# Supplementary material
Source: PubMed Central journal article supplement (PMC3064737)
Supplement: NIHMS277661-supplement-4_si_004.pdf [file NIHMS277661-supplement-4_si_004.pdf]

# Supporting Information

## Further Studies of Intramolecular Michael Reactions of Nitrosoalkenes for Construction of Functionalized Bridged Ring Systems

Praveen Kumar, Puhui Li, Ilia Korboukh, Tony L. Wang,  
Hemant Yennawar<sup>#</sup> and Steven M. Weinreb<sup>\*</sup>

*Department of Chemistry, The Pennsylvania State University  
University Park, Pennsylvania 16802, United States*

*E-Mail: [smw@chem.psu.edu](mailto:smw@chem.psu.edu)*

### Table of Contents

|                                                                      |          |
|----------------------------------------------------------------------|----------|
| Title Page                                                           | S1       |
| Experimental details of new compounds                                | S2-S22   |
| Crystal structures of compound <b>22b</b> , <b>33b</b> and <b>39</b> | S23-S25  |
| NMR spectra of new compounds                                         | S26-S139 |

### Scheme 1. Preparation of Iodoalkene 8

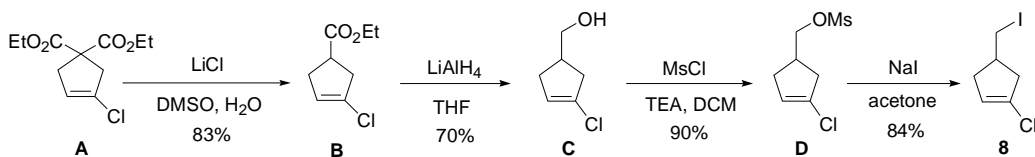

**3-Chlorocyclopent-3-ene-carboxylic Acid Ethyl Ester (B).** To a stirred solution of diester **A** (242 mg, 0.98 mmol) and water (0.05 mL) in DMSO (5 mL) was added LiCl (91 mg, 2.15 mmol). The reaction mixture was heated at reflux for 6 h, and then cooled to rt. Saturated aqueous NH<sub>4</sub>Cl was added and the aqueous phase was extracted with ether. The combined organic layers were dried over Na<sub>2</sub>SO<sub>4</sub>. The solvent was removed under reduced pressure, and the residue was purified by flash chromatography (15% ether/pentane) to afford the ester **B** as a clear oil (143 mg, 83%). <sup>1</sup>H NMR (300 MHz, CDCl<sub>3</sub>) δ 5.53-5.50 (m, 1H), 4.09 (q, *J* = 7.1 Hz, 2H), 3.22-3.11 (m, 1H), 2.86-2.78 (m, 1H), 2.72-2.65 (m, 1H), 2.63-2.58 (m, 2H), 1.19 (t, *J* = 7.1 Hz, 3H); <sup>13</sup>C NMR (75 MHz, CDCl<sub>3</sub>) δ 175.0, 130.7, 124.9, 61.1, 41.4, 40.5, 35.2, 14.5; HRMS-EI [M]<sup>+</sup> calcd for C<sub>8</sub>H<sub>11</sub>ClO<sub>2</sub>, 174.0448; found, 174.0452.

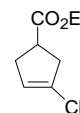

**(3-Chlorocyclopent-3-enyl)-methanol (C).** To a stirred suspension of LiAlH<sub>4</sub> (56 mg, 1.47 mmol) in THF (5 mL) at 0 °C was added dropwise ester **B** (143 mg, 0.82 mmol) in ether (5 mL). The mixture was stirred for 1 h at rt, and then diluted with ethyl acetate. The mixture was poured into 1 M HCl solution. Saturated aqueous NH<sub>4</sub>Cl and EtOAc were added. The organic layer was dried over Na<sub>2</sub>SO<sub>4</sub> and the solvent was removed under reduced pressure. The residue was purified by flash chromatography (50% ether/pentane) to afford the alcohol **C** as a colorless oil (76 mg, 70%). <sup>1</sup>H NMR (300 MHz, CDCl<sub>3</sub>) δ 5.54-5.51 (m, 1H), 3.50 (d, *J* = 6.3 Hz,

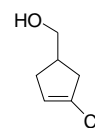

2H), 2.64-2.42 (m, 3H), 2.28-2.23 (m, 1H), 2.11-2.04 (m, 2H);  $^{13}\text{C}$  NMR (75 MHz,  $\text{CDCl}_3$ )  $\delta$  131.5, 125.6, 66.8, 40.6, 39.2, 34.5; HRMS-EI  $[\text{M}]^+$  calcd for  $\text{C}_6\text{H}_9\text{ClO}$ , 132.0342; found, 132.0337.

**Methanesulfonic Acid 3-Chlorocyclopent-3-enyl Methyl Ester (D).**

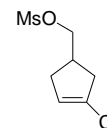

To a solution of alcohol **C** (71 mg, 0.53 mmol) in dichloromethane (5 mL) at 0 °C was added portionwise triethylamine (0.21 mL, 1.59 mmol) and mesyl chloride (0.11 mL, 1.59 mmol). The reaction mixture was stirred at 0 °C for 30 min, and then at rt for 3 h. The organic phase was diluted with dichloromethane and washed consecutively with brine, 1 M aqueous  $\text{KHSO}_4$ , brine, 5% aqueous  $\text{NaHCO}_3$ , brine, and dried over  $\text{Na}_2\text{SO}_4$ . The solvent was removed under reduced pressure and the residue was purified by flash chromatography (50% ether/pentane) affording the mesylate **D** as a colorless oil (106 mg, 94%).  $^1\text{H}$  NMR (300 MHz,  $\text{CDCl}_3$ )  $\delta$  5.55-5.52 (m, 1H), 4.08 (dd,  $J = 2.2, 6.9$  Hz, 2H), 2.96 (s, 3H), 2.80-2.61 (m, 2H), 2.57-2.47 (m, 1H), 2.34-2.26 (m, 1H), 2.17-2.09 (m, 1H);  $^{13}\text{C}$  NMR (75 MHz,  $\text{CDCl}_3$ )  $\delta$  131.3, 125.4, 72.6, 40.4, 37.9, 36.5, 34.5; LRMS-ES  $[\text{M} + \text{Na}]^+$  calcd for  $\text{C}_7\text{H}_{11}\text{ClNaO}_3\text{S}$ , 233.0; found, 233.0.

**1-Chloro-4-iodomethylcyclopentene (8).**

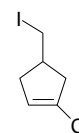

To a solution of mesylate **D** (108 mg, 0.51 mmol) in acetone (5 mL) was added sodium iodide (384 mg, 2.55 mmol) and the mixture was stirred at reflux for 12 h. The solvent was then removed under reduced pressure and the residue was purified by flash chromatography (pentane) to produce the iodide **8** as a clear oil (104 mg, 84%).  $^1\text{H}$  NMR (300 MHz,  $\text{CDCl}_3$ )  $\delta$  5.48-5.46 (m, 1H), 3.09 (d,  $J = 6.6$  Hz, 2H), 2.60-2.38 (m, 3H), 2.20-2.13 (m, 1H), 2.02-1.93 (m, 1H);  $^{13}\text{C}$  NMR (75 MHz,  $\text{CDCl}_3$ )  $\delta$  131.1, 125.6, 44.7, 39.9, 39.0, 13.6; HRMS-EI  $[\text{M}]^+$  calcd for  $\text{C}_6\text{H}_8\text{ClI}$ , 241.9359; found, 241.9368.

**2-(2-Allyl-4-chloropent-4-enyl)-1,3-diphenylpropane-1,3-dione**

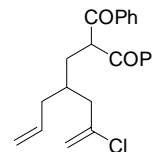

**(15a)**. To a stirred solution of 1,3-Diphenyl-propane-1,3-dione (238 mg, 1.06 mmol) in acetonitrile (10 mL) was added Verkade's base (230 mg, 1.06 mmol), and the mixture was stirred for 30 min at rt. Iodide **14** (261 mg, 0.96 mmol) was then added and the mixture was stirred for 72 h at rt. The solvent was removed under reduced pressure, and the residue was purified by flash chromatography (13% ether/hexanes) to afford the diene **15a** as a pale yellow oil (182 mg, 51%). <sup>1</sup>H NMR (300 MHz, CDCl<sub>3</sub>) δ 7.82-7.75 (m, 4H), 7.36-7.20 (m, 6H), 5.61-5.48 (m, 1H), 5.17 (t, *J* = 6.4 Hz, 1H), 4.98-4.83 (m, 4H), 2.22-2.03 (m, 2H), 2.01-1.80 (m, 5H); <sup>13</sup>C NMR (75 MHz, CDCl<sub>3</sub>) δ 196.3, 196.2, 141.5, 136.4, 136.3, 135.9, 133.9, 132.9, 129.3, 129.1, 129.0, 127.6, 117.9, 114.7, 55.8, 44.3, 38.1, 34.4, 33.2; HRMS-ES [M + H]<sup>+</sup> calcd for C<sub>23</sub>H<sub>24</sub>ClO<sub>2</sub>, 367.1465; found, 367.1470.

**2-(3-Chlorocyclopent-3-enylmethyl)-1,3-diphenylpropane-1,3-**

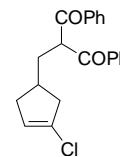

**dione (16a)**. A flame dried 250 mL two-necked flask equipped with a magnetic stirring bar and a condenser was charged with diene **15a** (172 mg, 0.47 mmol) and benzene (120 mL). The solution was deaerated by bubbling argon through the mixture for 2 h. The second-generation Grubbs catalyst (40 mg, 0.047 mmol) in 2 mL of benzene was added and the argon bubbling was continued for an additional 30 min. The mixture was heated and stirred at 65 °C for 2-3 days until TLC showed the reaction was complete. The solvent was removed under reduced pressure and the residue was purified by flash chromatography (17% ether/hexanes) to afford the vinyl chloride **16a** as a yellow oil (100 mg, 63%). <sup>1</sup>H NMR (300 MHz, CDCl<sub>3</sub>) δ 7.93-7.87 (m, 4H), 7.53-7.47 (m, 2H), 7.41-7.36 (m, 4H), 5.52-5.50 (m, 1H), 5.14 (t, *J* = 6.7 Hz, 1H), 2.62-

2.01 (m, 7H);  $^{13}\text{C}$  NMR (75 MHz,  $\text{CDCl}_3$ )  $\delta$  196.0, 136.3, 136.3, 134.0, 131.5, 129.3, 129.0, 125.8, 56.3, 43.8, 38.1, 36.3, 36.1; HRMS-ES  $[\text{M} + \text{H}]^+$  calcd for  $\text{C}_{21}\text{H}_{20}\text{ClO}_2$ , 339.1152; found, 339.1177.

**2-(3-Chloro-4-oxocyclopentylmethyl)-1,3-diphenylpropane-1,3-dione (17a).** To a solution of vinyl chloride **16a** (92 mg, 0.27 mmol), acetone (2.5 mL) and glacial acetic acid (1 mL) at 0 °C was added dropwise sodium hypochlorite (0.23 mL of 10% solution, 0.27 mmol) via syringe. The reaction mixture was stirred at 0 °C for 30 min and quenched by addition of saturated aqueous  $\text{NaHCO}_3$  solution. The mixture was then extracted with dichloromethane. The combined organic layers were washed with brine and dried over  $\text{Na}_2\text{SO}_4$ . The solvent was removed under reduced pressure and the residue was purified by flash chromatography (50% ether/hexanes) affording the  $\alpha$ -chloroketone **17a** as a white solid (38 mg, 40%).  $^1\text{H}$  NMR (300 MHz,  $\text{CDCl}_3$ )  $\delta$  7.88 (d,  $J = 7.7$  Hz, 4H), 7.54-7.36 (m, 6H), 5.15 (t,  $J = 6.5$  Hz, 1H), 4.06 (d,  $J = 5.6$  Hz, 1H), 2.70-2.53 (m, 1H), 2.33-1.78 (m, 6H);  $^{13}\text{C}$  NMR (75 MHz,  $\text{CDCl}_3$ )  $\delta$  209.7, 195.7, 195.6, 136.0, 135.9, 134.3, 134.2, 129.5, 129.4, 129.4, 129.0, 129.0, 57.5, 56.3, 42.7, 40.2, 34.6, 33.0; HRMS-ES  $[\text{M} + \text{H}]^+$  calcd for  $\text{C}_{21}\text{H}_{20}\text{ClO}_3$ , 355.1101; found, 355.1096.

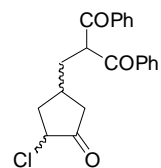

**2-(3-Chloro-*tert*-butyldimethylsilyloxyiminocyclopentylmethyl)-1,3-diphenylpropane-1,3-dione (18a).** To a solution of  $\alpha$ -chloroketone **17a** (23 mg, 0.065 mmol) in dichloromethane (3 mL) were added *O*-(*tert*-butyldimethylsilyl)-hydroxylamine (10 mg, 0.065 mmol), 4Å molecular sieves (crushed), and a catalytic amount of PPTS. The mixture was stirred at rt for 24 h and then filtered through a pad of Celite. The solvent was removed under reduced pressure and the

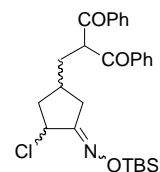

residue was purified by flash chromatography (25% ether/hexanes) to afford the  $\alpha$ -chloroketoxime **18a** as a colorless oil (19 mg, 61%).  $^1\text{H}$  NMR (300 MHz,  $\text{CDCl}_3$ , complex mixture of diastereomers including oxime geometric isomers)  $\delta$  7.84-7.76 (m, 4H), 7.46-7.27 (m, 6H), 5.08 (q,  $J = 6.5$  Hz, 1H), 4.84-4.61 (m, 1H), 2.78-2.64 (m, 1H), 2.53-2.39 (m, 1H), 2.28-1.88 (m, 4H), 1.72-1.55 (m, 1H), 0.82-0.68 (m, 9H), 0.02-0.00 (m, 6H);  $^{13}\text{C}$  NMR (75 MHz,  $\text{CDCl}_3$ )  $\delta$  196.0, 195.8, 195.8, 195.6, 167.3, 166.1, 136.2, 136.2, 136.1, 136.0, 134.1, 134.1, 134.1, 129.4, 129.4, 129.0, 129.0, 128.9, 59.1, 56.8, 56.4, 51.5, 43.0, 42.6, 35.4, 35.2, 34.6, 34.6, 34.2, 32.8, 26.3, 26.3, 18.4, 18.4, -4.8, -4.8; HRMS-ES  $[\text{M} + \text{H}]^+$  calcd for  $\text{C}_{27}\text{H}_{35}\text{ClNO}_3\text{Si}$ , 484.2075; found, 484.2066.

**2-(2-Allyl-4-chloropent-4-enyl)-1,1-bis-benzenesulfonylmethane**

**(15b)**. To a stirred suspension of sodium hydride (60% dispersion in mineral oil, 18 mg, 0.44 mmol) in DMF (1 mL) at 0 °C was dropwise added a solution of bis-benzenesulfonyl methane (137 mg, 0.44 mmol) in DMF (1 mL). After stirring the mixture for 30 min at 0 °C, a solution of iodide **14** (100 mg, 0.37 mmol) in DMF (1 mL) was added. The resulting mixture was warmed to rt and stirred for 72 h. Saturated aqueous  $\text{NH}_4\text{Cl}$  and ethyl acetate were added. The organic layer was separated and the aqueous layer was extracted with ethyl acetate. The combined organic layer was washed with water and brine. The organic layer was dried over  $\text{Na}_2\text{SO}_4$  and the solvent was removed under reduced pressure. The residue was purified by flash chromatography (25% ethyl acetate/hexanes) to afford the diene **15b** as a colorless oil (113 mg, 70%).  $^1\text{H}$  NMR (300 MHz,  $\text{CDCl}_3$ )  $\delta$  7.90-7.84 (m, 4H), 7.63-7.55 (m, 2H), 7.48 (t,  $J = 7.1$  Hz, 4H), 5.62-5.48 (m, 1H), 5.08 (d,  $J = 18.9$  Hz, 2H), 4.99-4.92 (m, 2H), 4.54 (t,  $J = 5.3$  Hz, 1H), 2.26-1.88 (m, 7H);  $^{13}\text{C}$  NMR (75 MHz,  $\text{CDCl}_3$ )  $\delta$  140.6, 138.3, 137.6, 135.1, 135.0,

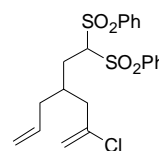

130.2, 129.9, 129.5, 129.5, 118.6, 115.3, 81.7, 43.9, 37.5, 33.5, 29.6; HRMS-ES  $[M + NH_4]^+$  calcd for  $C_{21}H_{27}ClNO_4S_2$ , 456.1070; found, 456.1067.

**4-(2,2-Bis-benzenesulfonylethyl)-2-chlorocyclopentene (16b).**

A flame dried 100 mL two-necked flask equipped with a magnetic stirring bar and a condenser was charged with diene **15b** (129 mg, 0.29 mmol) and

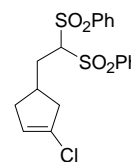

benzene (60 mL). The solution was deaerated by bubbling argon through the mixture for 2 h. The second-generation Grubbs catalyst (25 mg, 0.029 mmol) in 2 mL of benzene was added and the argon bubbling was continued for an additional 30 min. The mixture was heated and stirred at 65 °C for 2-3 days until TLC showed the reaction was complete. The solvent was removed under reduced pressure and the residue was purified by flash chromatography (25% ethyl acetate/hexanes) to afford the vinyl chloride **16b** as a pale yellow oil (61 mg, 51%).  $^1H$  NMR (300 MHz,  $CDCl_3$ )  $\delta$  7.93-7.79 (m, 4H), 7.67-7.57 (m, 2H), 7.51 (t,  $J = 7.6$  Hz, 4H), 5.47-5.44 (m, 1H), 4.25 (t,  $J = 5.6$  Hz, 1H), 2.73-2.39 (m, 2H), 2.20-2.11 (m, 3H), 2.02-1.81 (m, 2H);  $^{13}C$  NMR (75 MHz,  $CDCl_3$ )  $\delta$  138.0, 137.9, 135.2, 135.1, 131.1, 130.0, 130.0, 129.6, 129.6, 129.5, 129.4, 125.3, 82.8, 43.1, 37.3, 35.7, 32.0; HRMS-ES  $[M + NH_4]^+$  calcd for  $C_{19}H_{23}ClNO_4S_2$ , 428.0757; found, 428.0740.

**4-(2,2-Bis-benzenesulfonylethyl)-2-chlorocyclopentanone (17b).**

To a solution of vinyl chloride **16b** (51 mg, 0.124 mmol), acetone (2.5 mL) and glacial acetic acid (1 mL) at 0 °C was added dropwise sodium

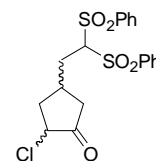

hypochlorite (0.11 mL of 10% solution, 0.124 mmol) via syringe. The reaction mixture was stirred at 0 °C for 30 min and quenched by addition of saturated aqueous  $NaHCO_3$  solution. The mixture was then extracted with dichloromethane. The combined organic layers were washed with brine and dried over  $Na_2SO_4$ . The solvent was removed under

reduced pressure and the residue was purified by flash chromatography (30% ethyl acetate/hexanes) affording the  $\alpha$ -chloroketone **17b** as a colorless oil (21 mg, 40%).  $^1\text{H}$  NMR (300 MHz,  $\text{CDCl}_3$ , diastereomer mixture)  $\delta$  8.03-7.83 (m, 4H), 7.72-7.62 (m, 2H), 7.56-7.51 (m, 4H), 4.30 (t,  $J = 5.5$  Hz, 1H), 4.02 (d,  $J = 6.9$  Hz, 1H), 2.76-2.00 (m, 7H);  $^{13}\text{C}$  NMR (75 MHz,  $\text{CDCl}_3$ )  $\delta$  209.0, 208.5, 137.7, 137.7, 136.0, 135.9, 135.4, 135.1, 132.3, 132.2, 130.1, 130.0, 129.9, 129.7, 129.6, 129.4, 129.3, 82.3, 82.2, 57.2, 56.6, 43.8, 41.7, 41.1, 39.4, 32.5, 31.0, 30.7; HRMS-ES  $[\text{M} + \text{NH}_4]^+$  calcd for  $\text{C}_{19}\text{H}_{23}\text{ClNO}_5\text{S}_2$ , 444.0706; found, 444.0699.

**4-(2,2-Bis-benzenesulfonylethyl)-2-chlorocyclopentanone-*tert*-butyldimethylsilyloxyoxime (18b).** To a solution of  $\alpha$ -chloroketone **17b** (19.7 mg, 0.046 mmol) in dichloromethane (3 mL) were added *O*-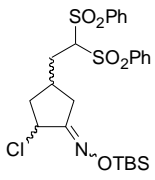-*tert*-butyldimethylsilyl)-hydroxylamine (15 mg, 0.092 mmol), 4Å molecular sieves (crushed), and a catalytic amount of PPTS. The mixture was stirred at rt for 19 h and then filtered through a pad of Celite. The solvent was removed under reduced pressure and the residue was purified by flash chromatography (25% ethyl acetate/hexanes) to afford the  $\alpha$ -chloroketoxime **18b** as a colorless oil (15.6 mg, 61%).  $^1\text{H}$  NMR (300 MHz,  $\text{CDCl}_3$ , complex mixture of diastereomers including oxime geometric isomers)  $\delta$  7.92-7.77 (m, 4H), 7.62-7.54 (m, 2H), 7.44 (t,  $J = 7.4$  Hz, 4H), 4.88-4.44 (m, 1H), 4.23-4.17 (m, 1H), 2.84-2.40 (m, 2H), 2.20-1.71 (m, 3H), 1.52-1.40 (m, 2H), 0.79-0.67 (m, 9H), 0.01-0.00 (m, 6H);  $^{13}\text{C}$  NMR (75 MHz,  $\text{CDCl}_3$ )  $\delta$  166.3, 165.2, 137.9, 137.9, 137.8, 135.8, 135.2, 132.4, 132.2, 130.0, 130.0, 130.0, 129.7, 129.4, 129.2, 82.7, 58.7, 51.1, 42.4, 41.9, 34.7, 34.5, 34.2, 34.1, 32.2, 32.0, 30.9, 30.6, 30.1, 26.4, 26.3, 18.5, 18.4, 18.3, -4.8, -4.8.



#### 4-Allyl-6-chloro-2-(4-methoxybenzoyl)-hept-6-enoic Acid

**Ethyl Ester (15c).** To a stirred solution of 3-(4-methoxyphenyl)-3-oxo-propionic acid ethyl ester (57 mg, 0.26 mmol) in acetonitrile (3 mL) was

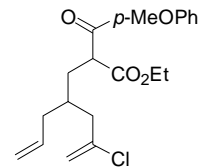

added Verkade's base (56 mg, 0.26 mmol), and the mixture was stirred for 30 min at 0 °C. Iodide **14** (70 mg, 0.26 mmol) was then added and the mixture was stirred for 7 h at 0 °C. The solvent was removed under reduced pressure, and the residue was purified by flash chromatography (20% ether/hexanes) to afford the diene **15c** as a colorless oil (65 mg, 68%). <sup>1</sup>H NMR (300 MHz, CDCl<sub>3</sub>, diastereomer mixture) δ 7.99-7.95 (m, 2H), 6.92 (d, *J* = 8.4 Hz, 2H), 5.81-5.65 (m, 1H), 5.19-5.12 (m, 2H), 5.08-5.00 (m, 2H), 4.43-4.38 (m, 1H), 4.12 (q, *J* = 7.1 Hz, 2H), 3.84 (s, 3H), 2.39-1.83 (m, 7H), 1.15 (t, *J* = 7.1 Hz, 3H); <sup>13</sup>C NMR (75 MHz, CDCl<sub>3</sub>) δ 193.9, 193.8, 170.7, 170.6, 164.5, 141.7, 141.6, 136.0, 131.6, 129.7, 118.1, 118.0, 114.8, 114.5, 62.0, 62.0, 56.1, 52.5, 52.4, 44.4, 44.2, 38.0, 37.8, 33.9, 33.7, 33.0, 32.8, 14.6; HRMS-ES [*M* + *H*]<sup>+</sup> calcd for C<sub>20</sub>H<sub>26</sub>ClO<sub>4</sub>, 365.1520; found, 365.1524.

**2-(3-Chlorocyclopent-3-enylmethyl)-3-(4-methoxyphenyl)-3-oxopropionic Acid Ethyl Ester (16c).** A flame dried 250 mL two-necked flask equipped with a magnetic stirring bar and a condenser was charged

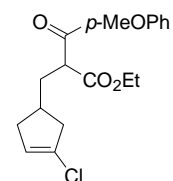

with diene **15c** (300 mg, 0.82 mmol) and benzene (200 mL). The solution was deaerated by bubbling argon through the mixture for 2 h. The second-generation Grubbs catalyst (70 mg, 0.082 mmol) in 2 mL of benzene was added and the argon bubbling was continued for an additional 30 min. The mixture was heated and stirred at 65 °C for 72 h. The solvent was removed under reduced pressure and the residue was purified by flash chromatography (30% ether/hexanes) to afford the vinyl chloride **16c** as a pale yellow oil

(216 mg, 78%).  $^1\text{H NMR}$  (300 MHz,  $\text{CDCl}_3$ , diastereomer mixture)  $\delta$  7.92-7.88 (m, 2H), 6.90-6.86 (m, 2H), 5.51-5.50 (m, 1H), 4.23-4.17 (m, 1H), 4.07 (q,  $J = 7.1$  Hz, 2H), 3.81 (s, 3H), 2.55-1.97 (m, 7H), 1.10 (t,  $J = 7.1$  Hz, 3H);  $^{13}\text{C NMR}$  (75 MHz,  $\text{CDCl}_3$ )  $\delta$  193.2, 193.2, 170.0, 164.0, 131.2, 131.1, 129.3, 129.2, 125.5, 125.5, 114.1, 61.5, 55.6, 52.6, 52.5, 43.4, 37.7, 37.7, 35.6, 35.3, 35.3, 14.1; HRMS-ES  $[\text{M} + \text{H}]^+$  calcd for  $\text{C}_{18}\text{H}_{22}\text{ClO}_4$ , 337.1207; found, 337.1208.

**2-(3-Chloro-4-oxocyclopentylmethyl)-3-(4-methoxyphenyl)-3-oxopropionic Acid Ethyl Ester (17c).** To a solution of vinyl chloride **16c** (168 mg, 0.49 mmol), acetone (2.5 mL) and glacial acetic acid (1 mL) at

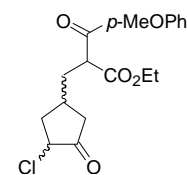

0 °C was added dropwise sodium hypochlorite (0.42 mL of 10% solution, 0.49 mmol) via syringe. The reaction mixture was stirred at 0 °C for 30 min and quenched by addition of saturated aqueous  $\text{NaHCO}_3$  solution. The mixture was then extracted with dichloromethane. The combined organic layers were washed with brine and dried over  $\text{Na}_2\text{SO}_4$ . The solvent was removed under reduced pressure and the residue was purified by flash chromatography (60% ether/hexanes) affording the  $\alpha$ -chloroketone **17c** as a colorless oil (101 mg, 57%).  $^1\text{H NMR}$  (300 MHz,  $\text{CDCl}_3$ , diastereomer mixture)  $\delta$  7.98-7.85 (m, 2H), 6.92-6.86 (m, 2H), 4.32-4.20 (m, 1H), 4.16-3.96 (m, 3H), 3.81 (s, 3H), 2.75-1.83 (m, 7H), 1.18-1.08 (m, 3H);  $^{13}\text{C NMR}$  (75 MHz,  $\text{CDCl}_3$ )  $\delta$  209.9, 209.9, 193.0, 192.9, 170.1, 164.5, 131.4, 129.3, 129.2, 114.5, 114.4, 62.1, 57.5, 56.0, 52.8, 52.7, 42.5, 42.5, 40.1, 40.1, 34.4, 32.4, 32.4, 14.4; HRMS-ES  $[\text{M} + \text{H}]^+$  calcd for  $\text{C}_{18}\text{H}_{22}\text{ClO}_5$ , 353.1156; found, 353.1151.

**2-(3-Chloro-4-tert-butyltrimethylsilyloxyiminocyclopentylmethyl)-3-(4-methoxyphenyl)-3-oxopropionic Acid Ethyl Ester (18c).** To a solution

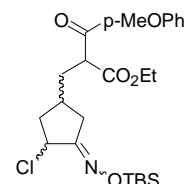

of  $\alpha$ -chloroketone **17c** (15.5 mg, 0.044 mmol) in dichloromethane (3 mL) were added *O*-(*tert*-butyldimethylsilyl)-hydroxylamine (6.5 mg, 0.044 mmol), 4Å molecular sieves (crushed), and a catalytic amount of PPTS. The mixture was stirred at rt for 5 h and then filtered through a pad of Celite. The solvent was removed under reduced pressure and the residue was purified by flash chromatography (50% ether/hexanes) to afford the  $\alpha$ -chloroketoxime **18c** as a colorless oil (10.5 mg, 50%). <sup>1</sup>H NMR (300 MHz, CDCl<sub>3</sub>, complex mixture of diastereomers including oxime geometric isomers)  $\delta$  7.86-7.82 (m, 2H), 6.82-6.75 (m, 2H), 4.84-4.61 (m, 1H), 4.18-4.11 (m, 1H), 4.04-3.95 (m, 2H), 3.73 (s, 3H), 2.78-2.58 (m, 1H), 2.37-2.32 (m, 1H), 2.13-1.81 (m, 4H), 1.65-1.52 (m, 1H), 1.06-1.01 (m, 3H), 0.82-0.70 (m, 9H), 0.01-0.00 (m, 6H); <sup>13</sup>C NMR (75 MHz, CDCl<sub>3</sub>)  $\delta$  193.3, 193.1, 193.1, 170.2, 170.2, 170.1, 167.5, 167.5, 166.2, 164.3, 164.3, 131.4, 129.4, 129.3, 129.3, 114.3, 61.9, 59.2, 55.9, 53.2, 53.1, 51.5, 42.9, 42.9, 35.2, 34.2, 33.9, 33.9, 32.6, 26.6, 26.3, 26.3, 26.0, 18.4, 18.4, 14.4, -4.8, -4.9; HRMS-ES [M + H]<sup>+</sup> calcd for C<sub>24</sub>H<sub>37</sub>ClNO<sub>5</sub>Si, 482.2130; found, 482.2110.

#### 4-Allyl-2-benzenesulfonyl-6-chlorohept-6-enoic Acid Methyl

**Ester (15d).** To a stirred suspension of sodium hydride (60% dispersion in mineral oil, 70 mg, 1.73 mmol) in DMF (8 mL) at 0 °C was dropwise added a solution of benzenesulfonyl acetic acid methyl ester (0.27 mL, 1.44 mmol) in DMF (2 mL). After stirring the mixture for 30 min at 0 °C, a solution of iodide **14** (468 mg, 1.73 mmol) in DMF (1 mL) was added. The resulting mixture was warmed to rt and stirred for 24 h. Saturated aqueous NH<sub>4</sub>Cl and ethyl acetate were added. The organic layer was separated and the aqueous layer was extracted with ethyl acetate. The combined organic layer was washed with water and brine. The organic layer was dried

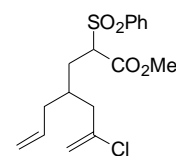

over Na<sub>2</sub>SO<sub>4</sub> and the solvent was removed under reduced pressure. The residue was purified by flash chromatography (20% ethyl acetate/hexanes) to afford the diene **15d** as a colorless oil (420 mg, 77%). <sup>1</sup>H NMR (300 MHz, CDCl<sub>3</sub>, diastereomer mixture) δ 7.85 (d, *J* = 7.6 Hz, 2H), 7.68 (t, *J* = 7.3 Hz, 1H), 7.56 (t, *J* = 7.6 Hz, 2H), 5.70-5.54 (m, 1H), 5.13 (d, *J* = 18.3 Hz, 2H), 5.04-4.93 (m, 2H), 4.12-4.06 (m, 1H), 3.64 (d, *J* = 6.3 Hz, 3H), 2.38-1.82 (m, 7H); <sup>13</sup>C NMR (75 MHz, CDCl<sub>3</sub>) δ 165.1, 164.9, 139.1, 138.9, 135.9, 135.8, 133.4, 133.2, 132.9, 128.0, 127.9, 117.0, 116.7, 113.6, 113.5, 67.6, 51.8, 51.8, 42.3, 41.7, 36.3, 34.9, 31.8, 31.4, 28.9, 28.3; HRMS-ES [M + NH<sub>4</sub>]<sup>+</sup> calcd for C<sub>17</sub>H<sub>25</sub>ClNO<sub>4</sub>S, 374.1193; found, 374.1188.

**2-Benzenesulfonyl-3-(3-chlorocyclopent-3-enyl)-propionic Acid**

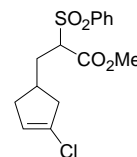

**Methyl Ester (16d).** A flame dried 250 mL two-necked flask equipped with a magnetic stirring bar and a condenser was charged with diene **15d** (148 mg, 0.41 mmol) and toluene (100 mL). The solution was deaerated by bubbling argon through the mixture for 2 h. The second-generation Grubbs catalyst (35 mg, 0.041 mmol) in 2 mL of toluene was added and the argon bubbling was continued for an additional 30 min. The mixture was heated and stirred at 85 °C for 20 h. The solvent was removed under reduced pressure and the residue was purified by flash chromatography (25% ethyl acetate/hexanes) to afford the vinyl chloride **16d** as a pale yellow oil (100 mg, 74%). <sup>1</sup>H NMR (300 MHz, CDCl<sub>3</sub>, diastereomer mixture) δ 7.87 (d, *J* = 7.7 Hz, 2H), 7.70 (t, *J* = 6.8 Hz, 1H), 7.58 (t, *J* = 7.6 Hz, 2H), 5.57-5.55 (m, 1H), 4.06-3.90 (m, 1H), 3.66 (s, 3H), 2.62-1.91 (m, 7H); <sup>13</sup>C NMR (75 MHz, CDCl<sub>3</sub>) δ 166.4, 136.8, 136.8, 134.4, 131.1, 130.7, 129.3, 129.3, 129.1, 125.3, 124.9, 69.7, 69.6, 53.1, 43.2, 42.5, 37.6, 36.8, 35.1, 32.7; HRMS-ES [M + NH<sub>4</sub>]<sup>+</sup> calcd for C<sub>15</sub>H<sub>21</sub>ClNO<sub>4</sub>S, 346.0880; found, 346.0889.

**2-Benzenesulfonyl-3-(3-chloro-4-oxocyclopentyl)-propionic Acid Methyl Ester (17d).** To a solution of vinyl chloride **16d** (64 mg,

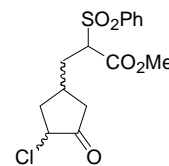

0.19 mmol), acetone (2.5 mL) and glacial acetic acid (1 mL) at 0 °C was added dropwise sodium hypochlorite (0.17 mL of 10% solution, 0.19 mmol) via syringe.

The reaction mixture was stirred at 0 °C for 30 min and quenched by addition of saturated aqueous NaHCO<sub>3</sub> solution. The mixture was then extracted with dichloromethane. The combined organic layers were washed with brine and dried over Na<sub>2</sub>SO<sub>4</sub>. The solvent was removed under reduced pressure and the residue was purified by flash chromatography (25% ethyl acetate/hexanes) affording the  $\alpha$ -chloroketone **17d** as a colorless oil (50 mg, 75%). <sup>1</sup>H NMR (300 MHz, CDCl<sub>3</sub>, diastereomer mixture)  $\delta$  7.80 (d, *J* = 7.4 Hz, 2H), 7.65 (t, *J* = 7.4 Hz, 1H), 7.53 (t, *J* = 7.6 Hz, 2H), 4.05 (d, *J* = 5.9 Hz, 1H), 3.97-3.85 (m, 1H), 3.59 (s, 3H), 2.59-1.76 (m, 7H); <sup>13</sup>C NMR (75 MHz, CDCl<sub>3</sub>)  $\delta$  208.8, 208.5, 166.5, 166.5, 137.0, 136.9, 135.0, 129.7, 129.6, 69.8, 69.7, 57.3, 57.0, 53.7, 53.6, 53.5, 42.0, 41.7, 39.9, 39.6, 32.1, 32.0, 32.0, 31.9; HRMS-ES [M + NH<sub>4</sub>]<sup>+</sup> calcd for C<sub>15</sub>H<sub>21</sub>ClNO<sub>5</sub>S, 362.0829; found, 362.0828.

**2-Benzenesulfonyl-3-(3-chloro-4-*tert*-butyldimethylsilyloxyiminocyclopentyl)-propionic Acid Methyl Ester**

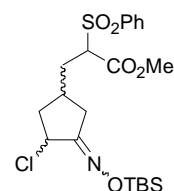

(**18d**). To a solution of  $\alpha$ -chloroketone **17d** (30 mg, 0.087 mmol) in dichloromethane (3 mL) were added *O*-(*tert*-butyldimethylsilyl)-hydroxylamine (27 mg, 0.174 mmol), 4Å molecular sieves (crushed), and a catalytic amount of PPTS. The mixture was stirred at rt for 24 h and then filtered through a pad of Celite. The solvent was removed under reduced pressure and the residue was purified by flash chromatography (20% ethyl acetate/hexanes) to afford the  $\alpha$ -chloroketoxime **18d** as a

colorless oil (28 mg, 68%).  $^1\text{H}$  NMR (300 MHz,  $\text{CDCl}_3$ , complex mixture of diastereomers including oxime geometric isomers)  $\delta$  7.72 (d,  $J = 7.7$  Hz, 2H), 7.56 (t,  $J = 7.4$  Hz, 1H), 7.44 (t,  $J = 7.6$  Hz, 2H), 4.83-4.61 (m, 1H), 3.98-3.77 (m, 1H), 3.53 (s, 3H), 2.73-2.51 (m, 1H), 2.39-2.19 (m, 1H), 2.09-1.81 (m, 4H), 1.59-1.51 (m, 1H), 0.84-0.67 (m, 9H), 0.01-0.00 (m, 6H);  $^{13}\text{C}$  NMR (75 MHz,  $\text{CDCl}_3$ )  $\delta$  165.4, 165.4, 165.3, 165.2, 164.9, 135.7, 135.6, 133.5, 128.4, 128.3, 128.3, 128.2, 128.2, 68.8, 68.8, 57.6, 57.3, 52.3, 52.2, 41.4, 41.1, 33.5, 32.2, 32.1, 30.9, 30.7, 30.6, 30.2, 25.0, 24.9, 24.9, 17.1, 17.0, 17.0, -6.2; HRMS-ES  $[\text{M} + \text{H}]^+$  calcd for  $\text{C}_{21}\text{H}_{33}\text{ClNO}_5\text{SSi}$ , 474.1537; found, 474.1553.

**4-Allyl-6-chloro-2-nitrohept-6-enoic Acid Ethyl Ester (15e).** To a stirred solution of tetrabutyl ammonium hydroxide (1.71 g, 2.64 mmol) in dichloromethane (2.5 mL) was slowly added nitroacetic acid ethyl ester (0.3 mL, 2.64 mmol), and the mixture was stirred at rt for 10 min. A solution of iodide **14** (783 mg, 2.90 mmol) in dichloromethane (0.5 mL) was then added in one portion and the mixture was stirred at rt for 72 h. The organic layer was separated and the aqueous layer was extracted with dichloromethane. The combined organic layer was washed with brine and dried over  $\text{MgSO}_4$ . The solvent was removed under reduced pressure, and the residue was purified by flash chromatography (7% ethyl acetate/hexanes) to afford the diene **15e** as an oil (217 mg, 30%).  $^1\text{H}$  NMR (300 MHz,  $\text{CDCl}_3$ , diastereomer mixture)  $\delta$  5.72-5.60 (m, 1H), 5.23-4.93 (m, 5H), 4.22 (q,  $J = 7.1$  Hz, 2H), 2.39-1.95 (m, 6H), 1.91-1.81 (m, 1H), 1.24 (t,  $J = 7.1$  Hz, 3H);  $^{13}\text{C}$  NMR (75 MHz,  $\text{CDCl}_3$ )  $\delta$  164.9, 164.9, 140.5, 140.4, 134.8, 134.6, 118.8, 118.6, 115.4, 115.2, 86.6, 86.5, 63.5, 43.7, 43.5, 37.6, 36.8, 33.8, 33.7, 32.2, 32.0, 14.2; HRMS-ES  $[\text{M} + \text{NH}_4]^+$  calcd for  $\text{C}_{12}\text{H}_{22}\text{ClN}_2\text{O}_4$ , 293.1268; found, 293.1281.

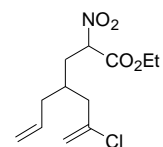

### 3-(3-Chlorocyclopent-3-enyl)-2-nitropropionic Acid Ethyl Ester

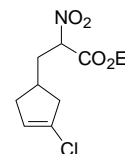

(**16e**). A flame dried 100 mL two-necked flask equipped with a magnetic stirring bar and a condenser was charged with diene **15e** (70 mg, 0.25 mmol) and toluene (60 mL). The solution was deaerated by bubbling argon through the mixture for 2 h. The second-generation Grubbs catalyst (44 mg, 0.05 mmol) in 2 mL of toluene was added and the argon bubbling was continued for an additional 30 min. The mixture was heated and stirred at 95 °C for 19 h. The solvent was removed under reduced pressure and the residue was purified by flash chromatography (9% ethyl acetate/hexanes) to afford the vinyl chloride **16e** as a pale yellow oil (37 mg, 59%). <sup>1</sup>H NMR (300 MHz, CDCl<sub>3</sub>, diastereomer mixture) δ 5.62-5.53 (m, 1H), 5.12-5.01 (m, 1H), 4.22 (q, *J* = 7.1 Hz, 2H), 2.54-1.97 (m, 7H), 1.24 (t, *J* = 7.1 Hz, 3H); <sup>13</sup>C NMR (75 MHz, CDCl<sub>3</sub>) δ 164.8, 164.8, 131.6, 131.2, 125.8, 125.4, 87.5, 87.3, 63.7, 63.6, 43.6, 43.1, 37.9, 37.4, 36.8, 36.7, 34.4, 34.4, 14.4.

### 3-(3-Chloro-4-oxocyclopentyl)-2-nitropropionic Acid Ethyl Ester

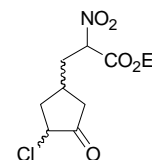

(**17e**). To a solution of vinyl chloride **16e** (32 mg, 0.13 mmol), acetone (2.5 mL) and glacial acetic acid (1 mL) at 0 °C was added dropwise sodium hypochlorite (0.12 mL of 10% solution, 0.13 mmol) via syringe. The reaction mixture was stirred at 0 °C for 20 min and quenched by addition of saturated aqueous NaHCO<sub>3</sub> solution. The mixture was then extracted with dichloromethane. The combined organic layers were washed with brine and dried over Na<sub>2</sub>SO<sub>4</sub>. The solvent was removed under reduced pressure and the residue was purified by flash chromatography (25% ethyl acetate/hexanes) affording the α-chloroketone **17e** as a colorless oil (14 mg, 41%). <sup>1</sup>H NMR (300 MHz, CDCl<sub>3</sub>, diastereomer mixture) δ 5.12-5.06 (m, 1H), 4.36-4.19 (m, 2H),

4.08 (d,  $J = 5.5$  Hz, 1H), 2.74-1.82 (m, 7H), 1.25 (t,  $J = 7.1$  Hz, 3H);  $^{13}\text{C}$  NMR (75 MHz,  $\text{CDCl}_3$ )  $\delta$  208.4, 208.3, 164.3, 87.0, 86.7, 63.9, 63.8, 57.1, 56.9, 41.8, 41.6, 39.7, 39.5, 35.6, 35.5, 31.0, 14.5, 14.3; HRMS-ES  $[\text{M} + \text{NH}_4]^+$  calcd for  $\text{C}_{10}\text{H}_{18}\text{ClN}_2\text{O}_5$ , 281.0904; found, 281.0893.

**3-(3-Chloro-4-*tert*-butyldimethylsilyloxyiminocyclopentyl)-2-nitropropionic Acid Ethyl Ester (18e).** To a solution of  $\alpha$ -chloroketone

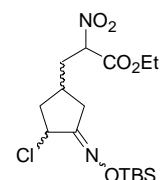

**17e** (12.0 mg, 0.046 mmol) in dichloromethane (2 mL) were added *O*-(*tert*-butyldimethylsilyl)-hydroxylamine (8.2 mg, 0.055 mmol), 4Å molecular sieves (crushed), and a catalytic amount of PPTS. The mixture was stirred at rt for 22 h and then filtered through a pad of Celite. The solvent was removed under reduced pressure and the residue was purified by flash chromatography (15% ethyl acetate/hexanes) to afford the  $\alpha$ -chloroketoxime **18e** as a colorless oil (12.4 mg, 70%).  $^1\text{H}$  NMR (300 MHz,  $\text{CDCl}_3$ , complex mixture of diastereomers including oxime geometric isomers)  $\delta$  5.05-4.94 (m, 1H), 4.85-4.61 (m, 1H), 4.23-4.11 (m, 2H), 2.82-2.53 (m, 1H), 2.36-2.23 (m, 2H), 2.15-2.00 (m, 2H), 1.96-1.85 (m, 1H), 1.66-1.56 (m, 1H), 1.15 (t,  $J = 7.1$  Hz, 3H), 0.82-0.66 (m, 9H), 0.01-0.00 (m, 6H);  $^{13}\text{C}$  NMR (75 MHz,  $\text{CDCl}_3$ )  $\delta$  166.2, 164.5, 87.4, 87.1, 63.7, 58.8, 58.6, 51.1, 42.5, 42.4, 42.0, 35.5, 35.4, 35.2, 34.7, 32.9, 32.4, 32.3, 32.2, 32.1, 26.6, 26.3, 26.3, 18.5, 14.3, -4.8; HRMS-ES  $[\text{M} + \text{H}]^+$  calcd for  $\text{C}_{16}\text{H}_{30}\text{ClN}_2\text{O}_5\text{Si}$ , 393.1613; found, 393.1614.

**4-Allyl-6-chloro-2-(diethoxyphosphoryl)-hept-6-enoic Acid Ethyl Ester (15f).** To a stirred suspension of sodium hydride (60% dispersion in mineral oil, 50 mg, 1.25 mmol) in DMF (2 mL) at 0 °C was dropwise added a solution of diethoxyphosphoryl acetic acid ethyl ester (0.26 mL, 1.25

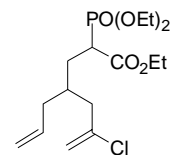



mmol) in DMF (2 mL). After stirring for 1 h at rt, reaction mixture was re-cooled to 0 °C and a solution of iodide **14** (405 mg, 1.5 mmol) in DMF (1 mL) was added. The resulting mixture was then heated at 55 °C for 13 h. Saturated aqueous NH<sub>4</sub>Cl and ethyl acetate were added. The organic layer was separated and the aqueous layer was extracted with ethyl acetate. The combined organic layer was washed with water and brine. The organic layer was dried over MgSO<sub>4</sub> and the solvent was removed under reduced pressure. The residue was purified by flash chromatography (50% ethyl acetate/hexanes) to afford the diene **15f** as a colorless oil (236 mg, 52%). <sup>1</sup>H NMR (300 MHz, CDCl<sub>3</sub>, diastereomer mixture) δ 5.68-5.53 (m, 1H), 5.07 (d, *J* = 16.0 Hz, 2H), 4.97-4.82 (m, 2H), 4.35-3.80 (m, 6H), 3.04-2.90 (m, 1H), 2.29-1.56 (m, 7H), 1.23-1.11 (m, 9H); <sup>13</sup>C NMR (75 MHz, CDCl<sub>3</sub>) δ 169.4, 169.4, 169.2, 169.1, 141.2, 141.1, 135.6, 135.0, 118.0, 117.7, 114.6, 114.4, 63.1, 63.0, 62.9, 61.8, 61.7, 44.7, 44.6, 43.8, 43.1, 42.9, 42.9, 37.7, 36.1, 34.2, 34.0, 33.8, 33.6, 30.7, 30.6, 30.2, 30.1, 16.7, 16.6, 14.4; HRMS-ES [M+H]<sup>+</sup> calcd for C<sub>16</sub>H<sub>29</sub>ClO<sub>5</sub>P, 367.1441; found, 367.1431.

**3-(3-Chlorocyclopent-3-enyl)-2-(diethoxyphosphoryl)-propionic Acid Ethyl Ester (16f)**. A flame dried 250 mL two-necked flask equipped with a magnetic stirring bar and a condenser was charged with diene **15f**

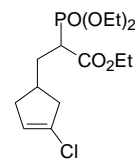

(197 mg, 0.54 mmol) and toluene (120 mL). The solution was deaerated by bubbling argon through the mixture for 2 h. The second-generation Grubbs catalyst (46 mg, 0.054 mmol) in 2 mL of toluene was added and the argon bubbling was continued for an additional 30 min. The mixture was heated and stirred at 85 °C for 20 h. The solvent was removed under reduced pressure and the residue was purified by flash chromatography (50% ethyl acetate/hexanes) to afford the vinyl chloride **16f** as a yellow oil (100 mg,

55%).  $^1\text{H}$  NMR (300 MHz,  $\text{CDCl}_3$ , diastereomer mixture)  $\delta$  5.64-5.55 (m, 1H), 4.23-4.07 (m, 6H), 2.99-2.87 (m, 1H), 2.62-1.86 (m, 7H), 1.33-1.22 (m, 9H);  $^{13}\text{C}$  NMR (75 MHz,  $\text{CDCl}_3$ )  $\delta$  169.0, 169.0, 131.1, 130.7, 125.4, 125.0, 62.8, 62.7, 62.7, 62.6, 61.4, 45.3, 45.1, 44.8, 43.8, 43.5, 43.4, 43.3, 43.2, 42.5, 37.6, 36.7, 36.2, 36.0, 33.1, 33.0, 33.0, 32.9, 16.3, 16.3, 16.2, 16.2, 14.0; HRMS-ES  $[\text{M}+\text{H}]^+$  calcd for  $\text{C}_{14}\text{H}_{25}\text{ClO}_5\text{P}$ , 339.1128; found, 339.1128.

**3-(3-Chloro-4-oxocyclopentyl)-2-(diethoxyphosphoryl)-propionic Acid Ethyl Ester (17f).** To a solution of vinyl chloride **16f** (70 mg, 0.21 mmol), acetone (3.5 mL) and glacial acetic acid (1.4 mL) at

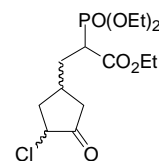

0 °C was added dropwise sodium hypochlorite (0.19 mL of 10% solution, 0.21 mmol) via syringe. The reaction mixture was stirred at 0 °C for 30 min and quenched by addition of saturated aqueous  $\text{NaHCO}_3$  solution. The mixture was then extracted with dichloromethane. The combined organic layers were washed with brine and dried over  $\text{Na}_2\text{SO}_4$ . The solvent was removed under reduced pressure and the residue was purified by flash chromatography (75% ethyl acetate/hexanes) affording the  $\alpha$ -chloroketone **17f** as a colorless oil (31 mg, 43%).  $^1\text{H}$  NMR (300 MHz,  $\text{CDCl}_3$ , diastereomer mixture)  $\delta$  4.60-4.24 (m, 7H), 3.23-3.15 (m, 1H), 2.88-2.02 (m, 7H), 1.58-1.44 (m, 9H);  $^{13}\text{C}$  NMR (75 MHz,  $\text{CDCl}_3$ )  $\delta$  209.3, 209.0, 208.9, 208.6, 168.8, 168.8, 168.7, 168.7, 63.0, 62.9, 62.8, 61.7, 57.2, 56.9, 45.0, 43.2, 41.9, 41.5, 39.4, 39.0, 32.8, 32.6, 32.6, 32.4, 32.0, 16.4, 16.3, 16.3, 16.2, 14.0; HRMS-ES  $[\text{M}+\text{H}]^+$  calcd for  $\text{C}_{14}\text{H}_{25}\text{ClO}_6\text{P}$ , 355.1077; found, 355.1072.

**3-(3-Chloro-4-tert-butyldimethylsilyloxyiminocyclopentyl)-2-(diethoxyphosphoryl)-propionic Acid Ethyl Ester (18f).** To a solution of  $\alpha$ -chloroketone **17f** (25.0 mg, 0.07 mmol) in dichloromethane (3 mL) were

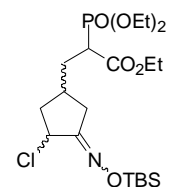

added *O*-(*tert*-butyldimethylsilyl)-hydroxylamine (24.0 mg, 0.14 mmol), 4Å molecular sieves (crushed), and a catalytic amount of PPTS. The mixture was stirred at rt for 21 h and then filtered through a pad of Celite. The solvent was removed under reduced pressure and the residue was purified by flash chromatography (75% ethyl acetate/hexanes) to afford the  $\alpha$ -chloroketoxime **18f** as a colorless oil (25.5 mg, 75%). <sup>1</sup>H NMR (300 MHz, CDCl<sub>3</sub>, complex mixture of diastereomers including oxime geometric isomers)  $\delta$  5.10-4.58 (m, 1H), 4.31-4.09 (m, 6H), 3.04-2.79 (m, 2H), 2.52-2.49 (m, 1H), 2.27-2.12 (m, 2H), 2.06-1.84 (m, 2H), 1.74-1.63 (m, 1H), 1.35-1.24 (m, 9H), 0.97-0.84 (m, 9H), 0.17-0.13 (m, 6H); <sup>13</sup>C NMR (75 MHz, CDCl<sub>3</sub>)  $\delta$  169.1, 168.9, 167.1, 166.7, 63.0, 62.8, 62.7, 61.6, 58.9, 58.6, 45.6, 43.8, 42.3, 42.0, 34.3, 34.1, 32.1, 31.8, 26.0, 25.9, 25.9, 18.1, 18.0, 16.4, 16.3, 14.1, -5.2, -5.2; HRMS-ES [M + H]<sup>+</sup> calcd for C<sub>20</sub>H<sub>40</sub>ClNO<sub>6</sub>PSi, 484.2051; found, 484.2039.

**4-Allyl-2-benzenesulfonyl-6-chlorohept-6-enitrile (15g).** To a stirred suspension of sodium hydride (60% dispersion in mineral oil, 43 mg, 1.07 mmol) in THF (2 mL) at 50 °C was dropwise added a solution of benzenesulfonyl acetonitrile (157 mg, 0.85 mmol) in THF (2 mL). After stirring the mixture for 15 min at 50 °C, a solution of iodide **14** (252 mg, 0.93 mmol) in THF (1 mL) was added in one portion. The resulting mixture was then heated at reflux for 19 h. Saturated aqueous NH<sub>4</sub>Cl and ethyl acetate were added. The organic layer was separated and the aqueous layer was extracted with ethyl acetate. The combined organic layer was washed with water and brine. The organic layer was dried over Na<sub>2</sub>SO<sub>4</sub> and the solvent was removed under reduced pressure. The residue was purified by flash chromatography (20% ethyl acetate/hexanes) to afford the diene **15g** as a colorless oil (214 mg, 78%). <sup>1</sup>H

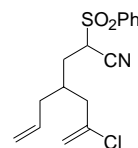

NMR (300 MHz, CDCl<sub>3</sub>, diastereomer mixture)  $\delta$  7.83 (d,  $J$  = 7.5 Hz, 2H), 7.61 (t,  $J$  = 7.4 Hz, 1H), 7.48 (t,  $J$  = 7.7 Hz, 2H), 5.61-5.46 (m, 1H), 5.08-4.84 (m, 4H), 3.97-3.91 (m, 1H), 2.32-1.73 (m, 7H); <sup>13</sup>C NMR (75 MHz, CDCl<sub>3</sub>)  $\delta$  140.2, 140.1, 135.8, 134.7, 134.3, 130.0, 130.0, 130.0, 119.2, 118.9, 115.8, 115.5, 114.5, 114.2, 56.1, 43.8, 43.3, 38.1, 36.6, 33.2, 33.0, 30.4, 30.0; HRMS-ES [M + NH<sub>4</sub>]<sup>+</sup> calcd for C<sub>16</sub>H<sub>22</sub>ClN<sub>2</sub>O<sub>2</sub>S, 341.1091; found, 341.1089.

**2-Benzenesulfonyl-3-(3-chlorocyclopent-3-enyl)-propionitrile (16g).**

A flame dried 250 mL two-necked flask equipped with a magnetic stirring bar and a condenser was charged with diene **15g** (214 mg, 0.66 mmol) and toluene (150 mL). The solution was deaerated by bubbling argon through the mixture for 2 h. The second-generation Grubbs catalyst (112 mg, 0.132 mmol) in 2 mL of toluene was added and the argon bubbling was continued for an additional 30 min. The mixture was heated and stirred at 95 °C for 19 h. The solvent was removed under reduced pressure and the residue was purified by flash chromatography (20% ethyl acetate/hexanes) to afford the vinyl chloride **16g** as a pale yellow oil (74 mg, 38%). <sup>1</sup>H NMR (300 MHz, CDCl<sub>3</sub>, diastereomer mixture)  $\delta$  7.95 (d,  $J$  = 7.7 Hz, 2H), 7.72 (t,  $J$  = 7.4 Hz, 1H), 7.59 (t,  $J$  = 7.7 Hz, 2H), 5.64-5.52 (m, 1H), 3.90-3.79 (m, 1H), 2.74-2.49 (m, 3H), 2.28-1.89 (m, 4H); <sup>13</sup>C NMR (75 MHz, CDCl<sub>3</sub>)  $\delta$  135.8, 135.8, 135.7, 131.6, 130.9, 130.1, 130.1, 130.0, 125.7, 125.0, 114.3, 56.8, 56.6, 43.7, 42.8, 38.1, 37.1, 35.2, 35.1, 32.9, 32.9; HRMS-ES [M + NH<sub>4</sub>]<sup>+</sup> calcd for C<sub>14</sub>H<sub>18</sub>ClN<sub>2</sub>O<sub>2</sub>S, 313.0778; found, 313.0776.

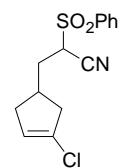

**2-Benzenesulfonyl-3-(3-chloro-4-oxocyclopentyl)-propionitrile**

**(17g).** To a solution of vinyl chloride **16g** (27.8 mg, 0.094 mmol), acetone (1.8 mL) and glacial acetic acid (0.7 mL) at 0 °C was added dropwise sodium

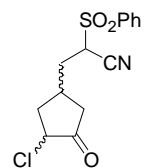

hypochlorite (0.086 mL of 10% solution, 0.094 mmol) via syringe. The reaction mixture was stirred at 0 °C for 30 min and quenched by addition of saturated aqueous NaHCO<sub>3</sub> solution. The mixture was then extracted with dichloromethane. The combined organic layers were washed with brine and dried over MgSO<sub>4</sub>. The solvent was removed under reduced pressure and the residue was purified by flash chromatography (25% ethyl acetate/hexanes) affording the  $\alpha$ -chloroketone **17g** as a colorless oil (16.4 mg, 56%). <sup>1</sup>H NMR (300 MHz, CDCl<sub>3</sub>, diastereomer mixture)  $\delta$  7.96 (d, *J* = 7.2 Hz, 2H), 7.74 (t, *J* = 6.8 Hz, 1H), 7.61 (t, *J* = 7.6 Hz, 2H), 4.10 (d, *J* = 5.3 Hz, 1H), 3.94-3.81 (m, 1H), 2.80-2.62 (m, 2H), 2.40-2.20 (m, 2H), 2.17-1.81 (m, 3H); <sup>13</sup>C NMR (75 MHz, CDCl<sub>3</sub>)  $\delta$  208.0, 207.7, 136.0, 135.5, 135.5, 130.2, 130.1, 128.3, 114.1, 58.5, 57.1, 56.7, 56.6, 56.2, 55.9, 42.0, 41.9, 41.4, 41.3, 39.9, 39.8, 39.4, 39.2, 32.5, 32.4, 32.0, 31.9, 31.9, 31.1, 31.0; HRMS-ES [M + NH<sub>4</sub>]<sup>+</sup> calcd for C<sub>14</sub>H<sub>18</sub>ClN<sub>2</sub>O<sub>3</sub>S, 329.0727; found, 329.0728.

**2-Benzenesulfonyl-3-(3-chloro-4-*tert*-**

**butyldimethylsilyloxyiminocyclopentyl)-propionitrile (18g).** To a

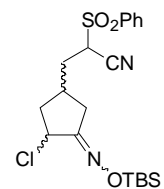

solution of  $\alpha$ -chloroketone **17g** (34.0 mg, 0.11 mmol) in dichloromethane (3 mL) were added *O*-(*tert*-butyldimethylsilyl)-hydroxylamine (34.0 mg, 0.22 mmol), 4 Å molecular sieves (crushed), and a catalytic amount of PPTS. The mixture was stirred at rt for 21 h and then filtered through a pad of Celite. The solvent was removed under reduced pressure and the residue was purified by flash chromatography (20% ethyl acetate/hexanes) to afford the  $\alpha$ -chloroketoxime **18g** as a colorless oil (20.0 mg, 42%).

<sup>1</sup>H NMR (300 MHz, CDCl<sub>3</sub>, complex mixture of diastereomers including oxime geometric isomers)  $\delta$  7.86 (d, *J* = 7.6 Hz, 2H), 7.64 (t, *J* = 7.4 Hz, 1H), 7.51 (t, *J* = 7.6 Hz, 2H), 4.95-4.50 (m, 1H), 3.82-3.62 (m, 1H), 2.88-2.38 (m, 2H), 2.24-1.82 (m, 4H), 1.71-

1.57 (m, 1H), 0.77-0.69 (m, 9H), 0.01-0.00 (m, 6H);  $^{13}\text{C}$  NMR (75 MHz,  $\text{CDCl}_3$ )  $\delta$  166.1, 165.7, 164.9, 164.6, 135.9, 135.6, 130.1, 130.1, 130.1, 114.2, 58.7, 58.4, 56.9, 56.9, 56.6, 42.8, 42.2, 34.6, 33.8, 33.4, 33.4, 32.5, 31.9, 31.8, 26.4, 26.3, 26.3, 18.5, 18.4, -4.8, -4.8; HRMS-ES  $[\text{M} + \text{H}]^+$  calcd for  $\text{C}_{20}\text{H}_{30}\text{ClN}_2\text{O}_3\text{SSi}$ , 441.1435; found, 441.1452.

Figure 1: Ortep Diagram of X-ray Diffraction Structure of 22b.

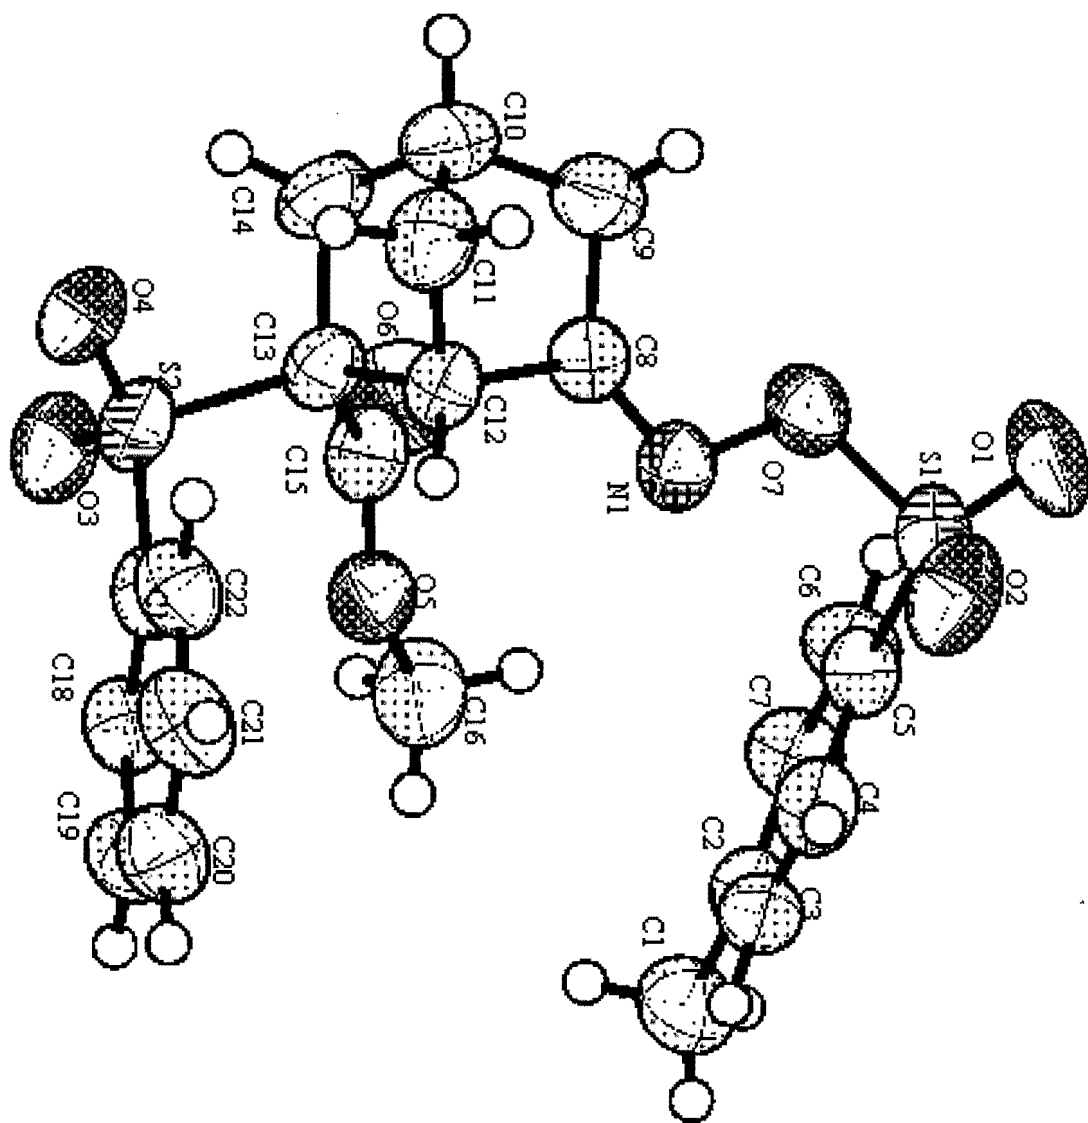

Figure 2: Ortep Diagram of X-ray Diffraction Structure of 39.

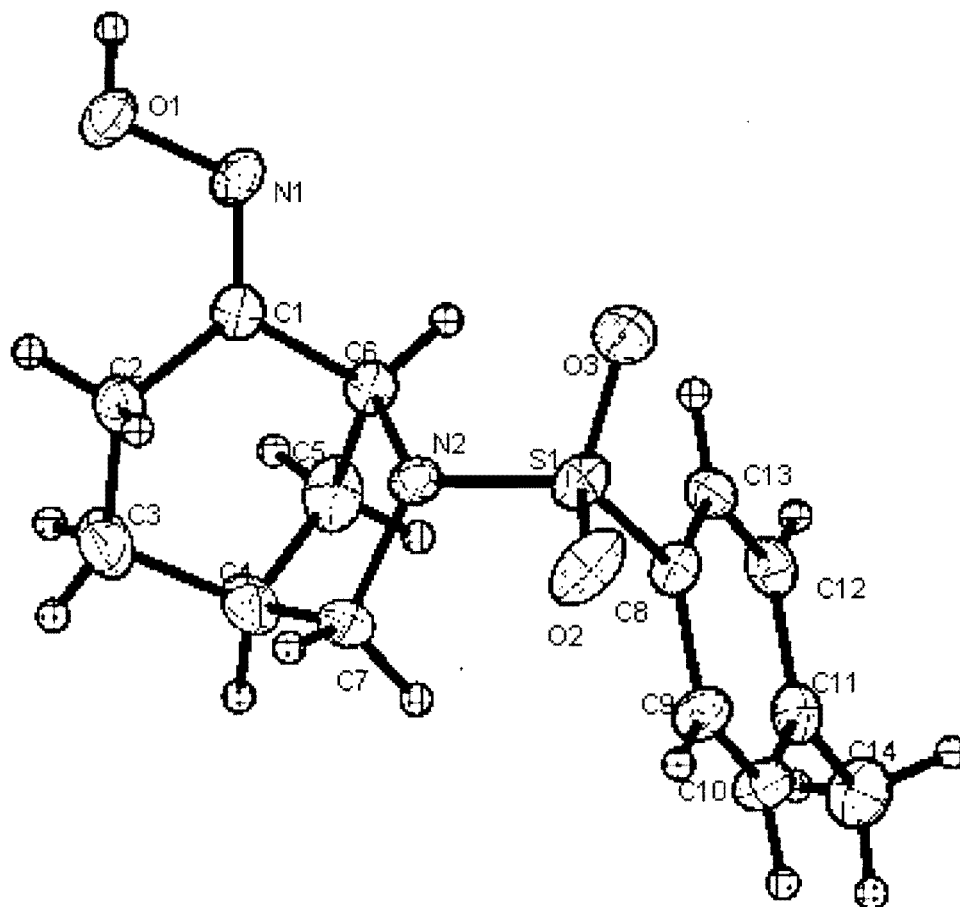



Figure 3: Ortep Diagram of X-ray Diffraction Structure of 33b.

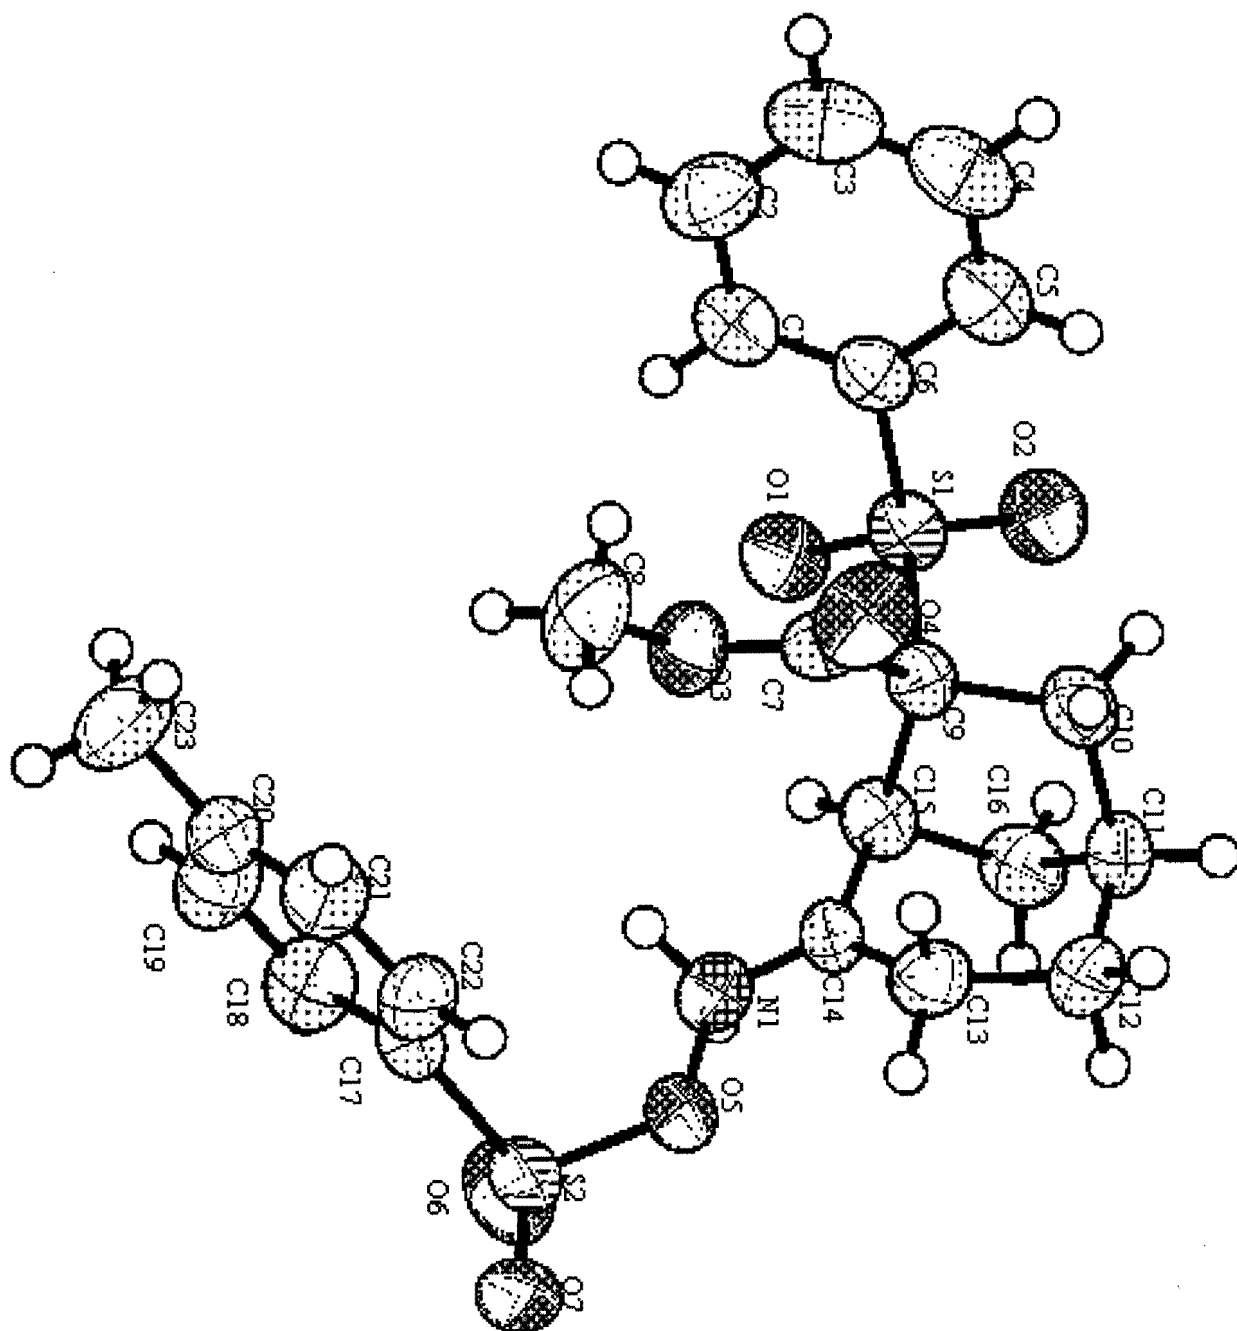

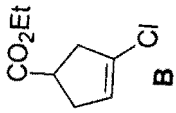

Current Data Parameters  
 NAME Nov28-2006-Me.in  
 EXPNO 10  
 PROCNO 1

F2 - Acquisition Parameters  
 Date\_ 20061128  
 Time 14.19  
 INSTRUM spect  
 PROBHD 5 mm Multinu  
 PULPROG zg30  
 TD 65536  
 SOLVENT CDCl3  
 NS 16  
 DS 2  
 SWH 6172.839 Hz  
 FIDRES 0.094190 Hz  
 AQ 5.3084660 sec  
 RG 256  
 DW 81.000 usec  
 DE 6.00 usec  
 TE 300.0 K  
 D1 1.00000000 sec

===== CHANNEL f1 =====  
 NUC1 1H  
 P1 9.60 usec  
 PL1 -6.00 dB  
 SF01 300.1318534 MHz

F2 - Processing parameters  
 SI 32768  
 SF 300.1300246 MHz  
 WDW EM  
 SSB 0  
 LB 0.30 Hz  
 GB 0  
 PC 1.00

1D NMR plot parameters  
 CX 20.00 cm  
 F1P 11.000 ppm  
 F1 3301.43 Hz  
 F2P -1.000 ppm  
 F2 -300.13 Hz  
 PPMCM 0.60000 ppm/cm  
 HZCM 180.07802 Hz/cm

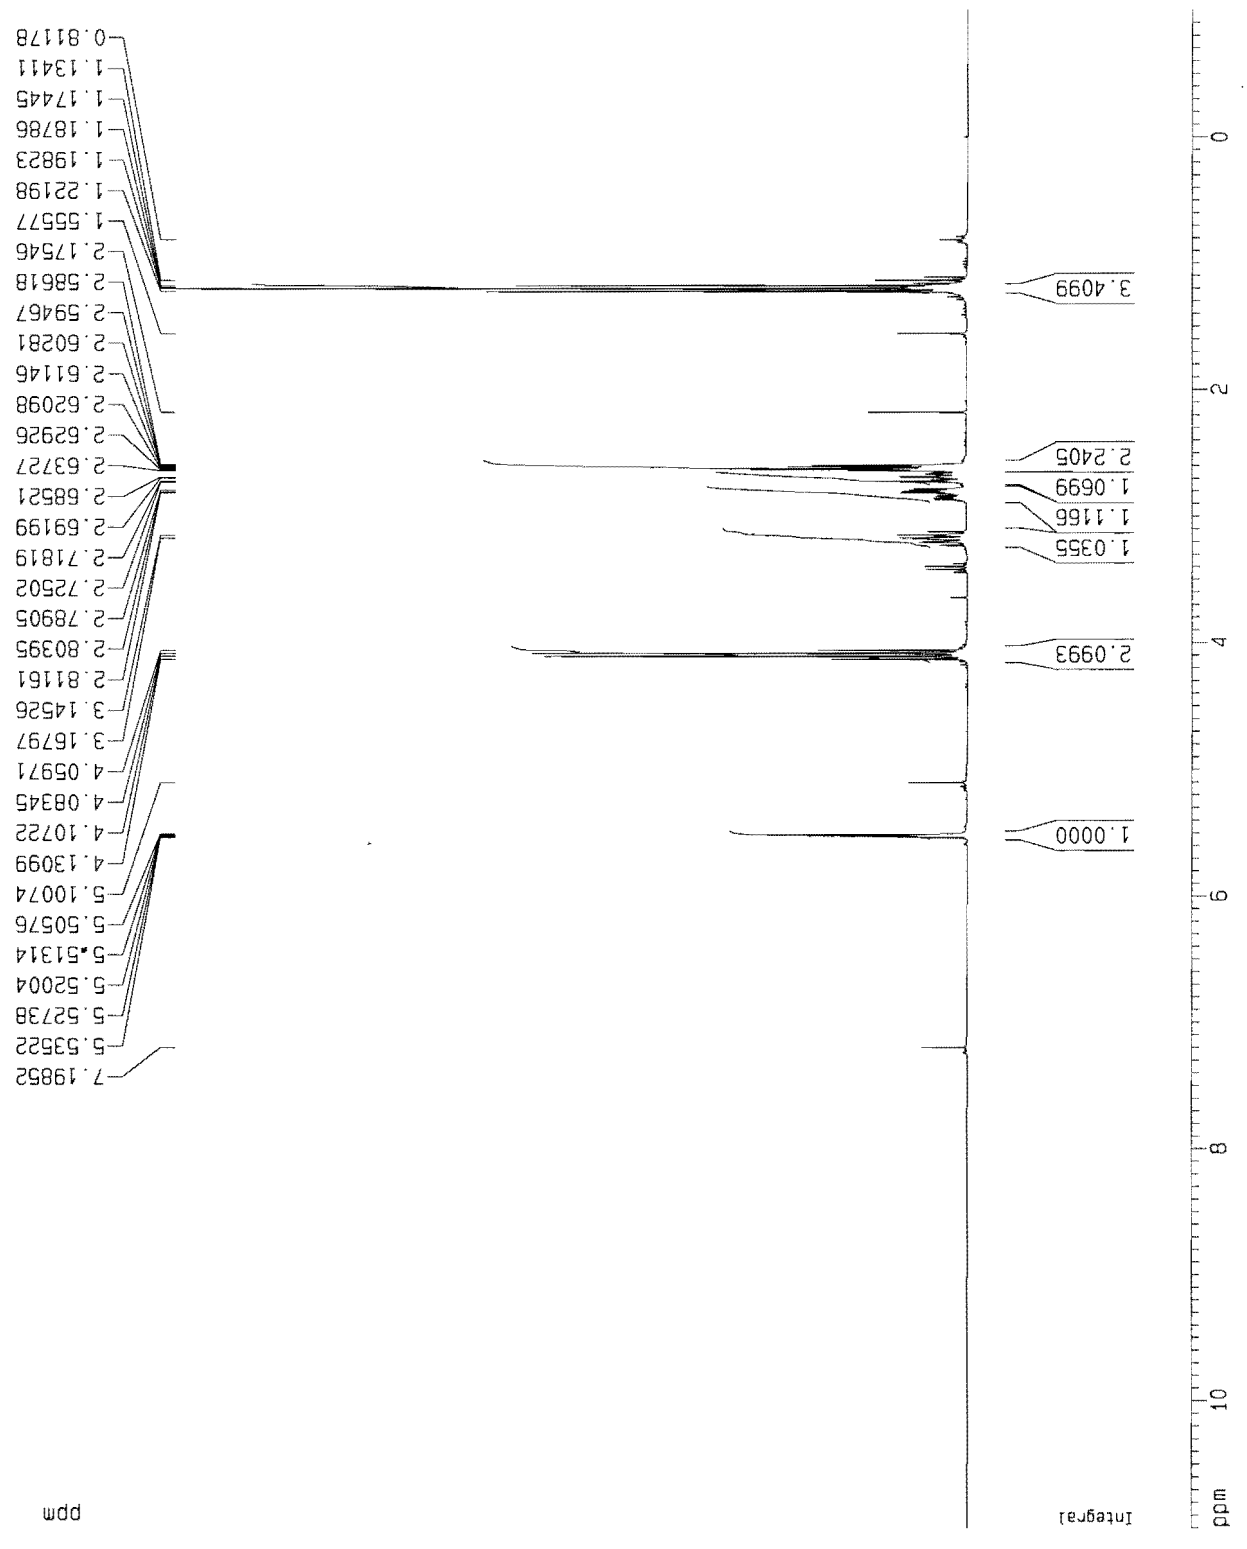

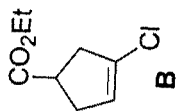

Current Data Parameters  
 NAME Nov28-2006-wejn  
 EXPNO 11  
 PROCNO 1

F2 - Acquisition Parameters  
 Date\_ 20061128  
 Time 14.25  
 INSTRUM spect  
 PROBHD 5 mm Multinu  
 PULPROG zgpg30  
 TD 65536  
 SOLVENT CDCl<sub>3</sub>  
 NS 90  
 DS 4  
 SWH 18832.393 Hz  
 FIDRES 0.287360 Hz  
 AQ 1.7400308 sec  
 RG 16384  
 DM 26.550 usec  
 DE 6.00 usec  
 TE 300.0 K  
 D1 2.00000000 sec  
 d11 0.03000000 sec  
 d12 0.00002000 sec

===== CHANNEL f1 =====  
 NUC1 13C  
 P1 11.80 usec  
 PL1 0.00 dB  
 SF01 75.4760200 MHz

===== CHANNEL f2 =====  
 CPDPRG2 waltz16  
 NUC2 1H  
 PCPD2 110.00 usec  
 PL2 0.00 dB  
 PL12 17.50 dB  
 PL13 17.50 dB  
 SF02 300.1312005 MHz

F2 - Processing parameters  
 SI 32768  
 SF 75.4677190 MHz  
 WDW EM  
 SSB 0  
 LB 1.00 Hz  
 GB 0  
 PC 1.40

10 NMR plot parameters  
 CX 20.00 cm  
 F1P 215.000 ppm  
 F1 16225.56 Hz  
 F2P -5.000 ppm  
 F2 -377.34 Hz  
 PPMCM 11.00000 ppm/cm  
 HZCM 830.14490 Hz/cm

14.567  
 35.274  
 40.561  
 41.473  
 61.195  
 76.974  
 77.397  
 77.821  
 124.967  
 130.798  
 175.034

ppm

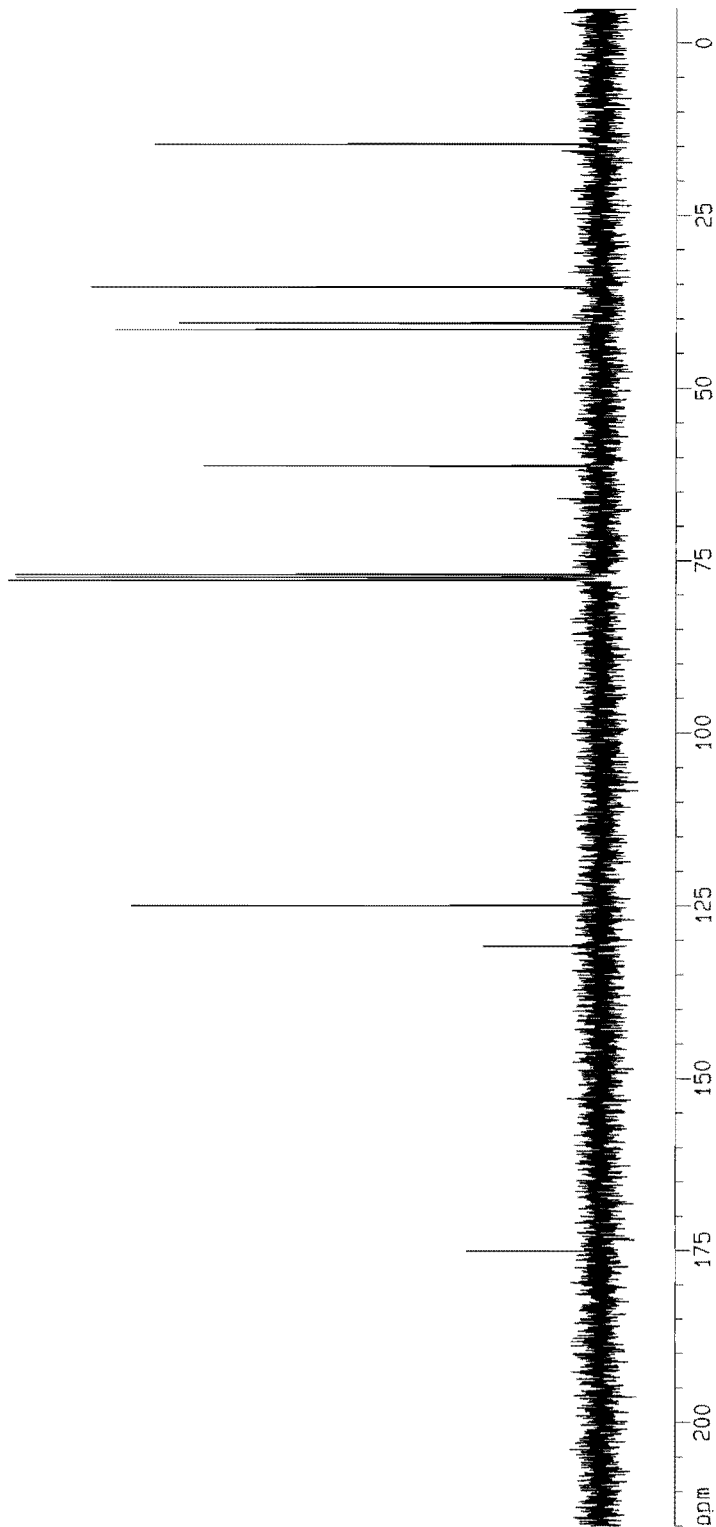

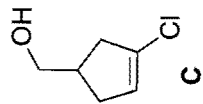

Current Data Parameters  
 NAME Dec03-2006-Me.in  
 EXPNO 10  
 PROCNO 1

F2 - Acquisition Parameters  
 Date\_ 20061203  
 Time 11.45  
 INSTRUM spect  
 PROBHD 5 mm Multinu  
 PULPROG zg30  
 TD 65536  
 SOLVENT CDCl3  
 NS 16  
 DS 2  
 SMH 6172.839 Hz  
 FIDRES 0.094190 Hz  
 AQ 5.3084660 sec  
 RG 181  
 DM 81.000 usec  
 DE 6.00 usec  
 TE 300.0 K  
 D1 1.00000000 sec

===== CHANNEL f1 =====  
 NUC1 1H  
 P1 9.60 usec  
 PL1 -6.00 dB  
 SF01 300.1318534 MHz

F2 - Processing parameters  
 SI 32768  
 SF 300.1300215 MHz  
 WDW EM  
 SSB 0  
 LB 0.30 Hz  
 GB 0  
 PC 1.00

1D NMR plot parameters  
 CX 20.00 cm  
 F1P 11.000 ppm  
 F1 3301.43 Hz  
 F2P -1.000 ppm  
 F2 -300.13 Hz  
 PPMCM 0.60000 ppm/cm  
 HZCM 180.07802 Hz/cm

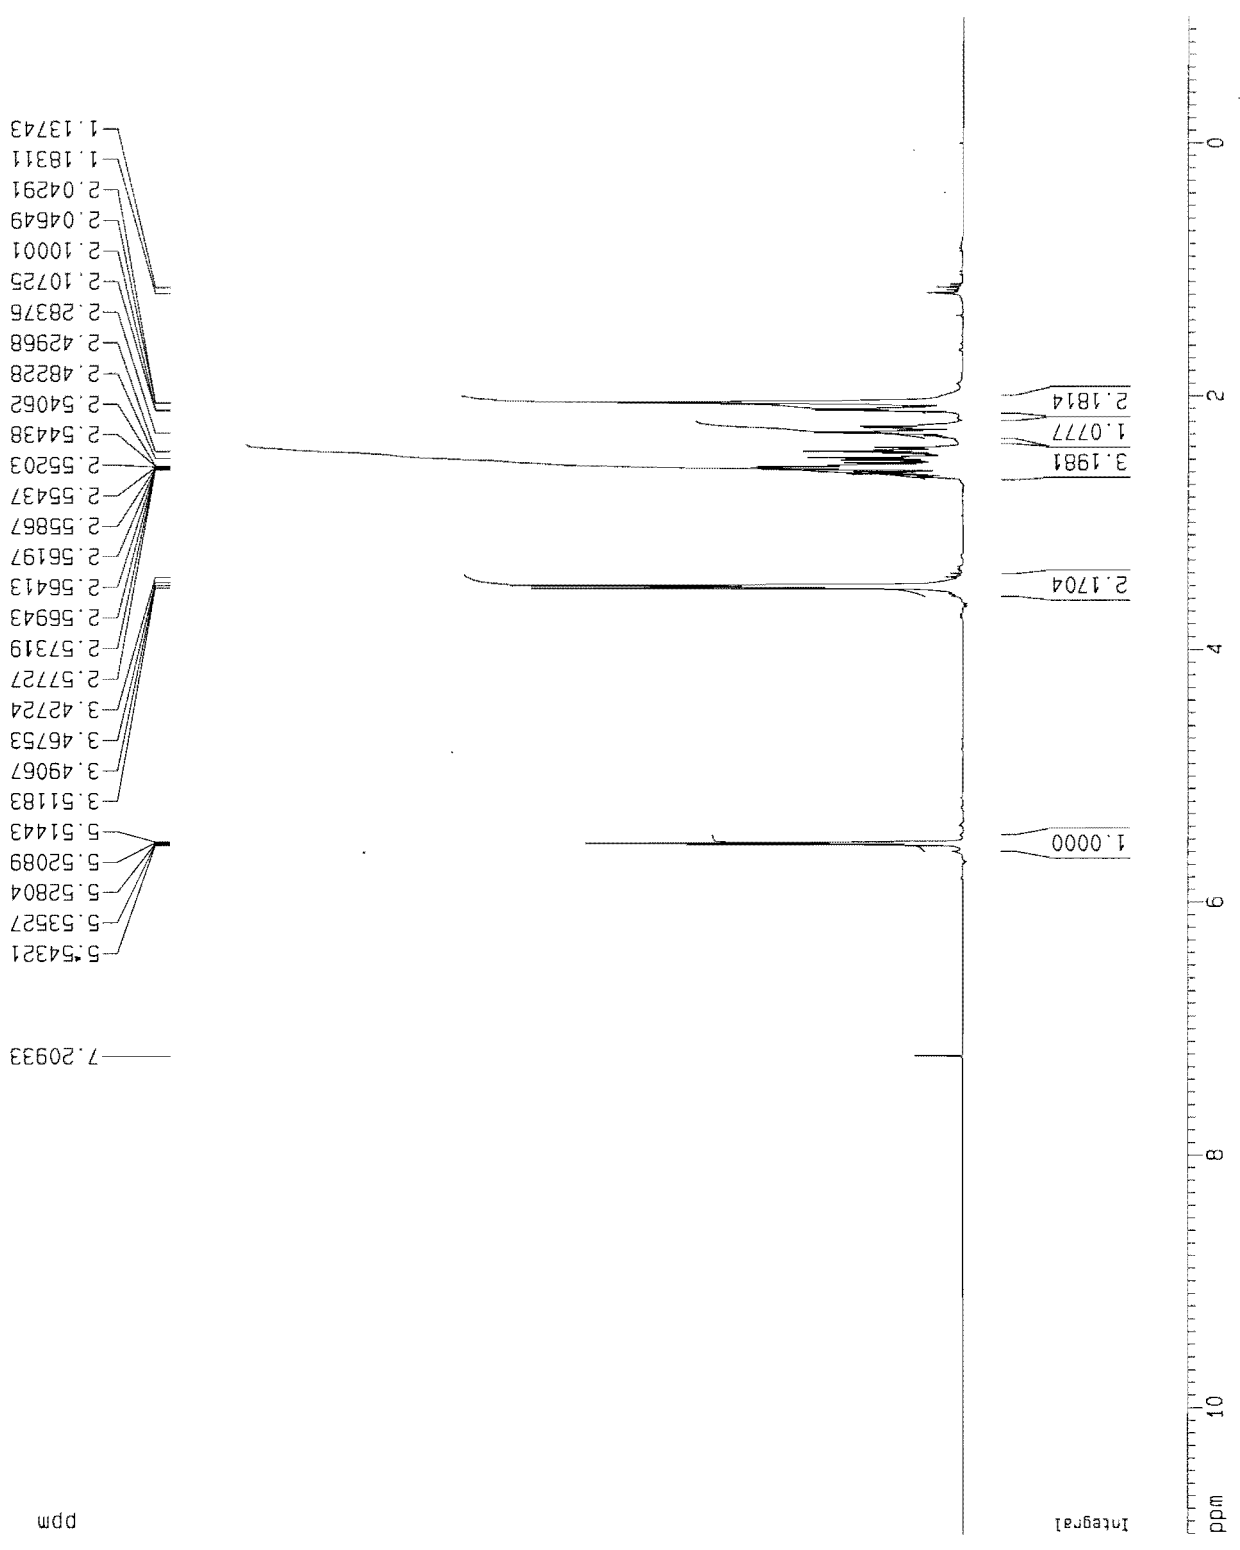

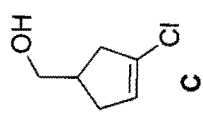

Current Data Parameters  
 NAME Dec03-2006-Wein  
 EXPNO 11  
 PROCNO 1

F2 - Acquisition Parameters  
 Date\_ 20061203  
 Time 11.55  
 INSTRUM spect  
 PROBHD 5 mm Multinu  
 PULPROG zgpg30  
 TD 65536  
 SOLVENT CDCl3  
 NS 131  
 DS 4  
 SWH 18832.393 Hz  
 FIDRES 0.287360 Hz  
 AQ 1.7400308 sec  
 RG 13004  
 DW 26.550 usec  
 DE 6.00 usec  
 TE 300.0 K  
 O1 2.00000000 sec  
 d11 0.03000000 sec  
 d12 0.00002000 sec

===== CHANNEL f1 =====  
 NUC1 13C  
 P1 11.80 usec  
 PL1 0.00 dB  
 SF01 75.4760200 MHz

===== CHANNEL f2 =====  
 CPDPRG2 waltz16  
 NUC2 1H  
 PCPD2 110.00 usec  
 PL2 0.00 dB  
 PL12 17.50 dB  
 PL13 17.50 dB  
 SF02 300.1312005 MHz

F2 - Processing parameters  
 SI 32768  
 SF 75.4677190 MHz  
 WDW EM  
 SSB 0  
 LB 1.00 Hz  
 GB 0  
 PC 1.40

1D NMR plot parameters  
 CX 20.00 cm  
 F1P 215.000 ppm  
 F1 16225.56 Hz  
 F2P -5.000 ppm  
 F2 -377.34 Hz  
 PPMCM 11.00000 ppm/cm  
 HZCM 830.14490 Hz/cm

131.524  
 125.690  
 77.878  
 77.454  
 77.030  
 66.831  
 40.624  
 39.284  
 34.578

ppm

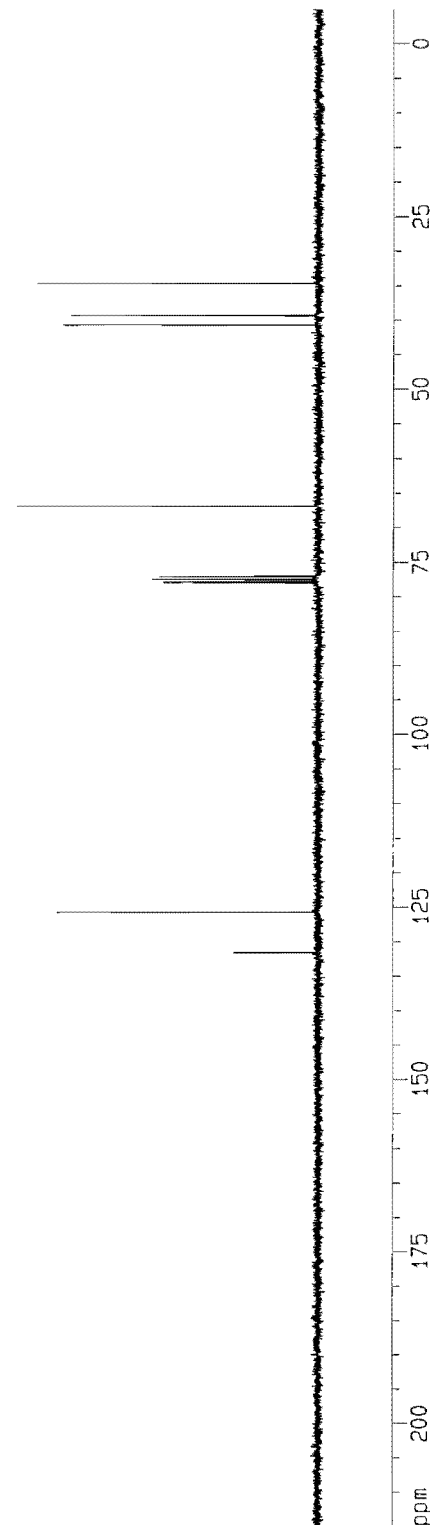

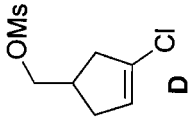

Current Data Parameters  
 NAME Dec05-2006-Wein  
 EXPNO 10  
 PROCNO 1

F2 - Acquisition Parameters  
 Date\_ 20061205  
 Time 17.25  
 INSTRUM spect  
 PROBHD 5 mm GNP 1H/1  
 PULPROG zg30  
 TD 65536  
 SOLVENT CDCl3  
 NS 16  
 DS 2  
 SWH 6172.839 Hz  
 FIDRES 0.094190 Hz  
 AQ 5.3084660 sec  
 RG 128  
 DW 81.000 usec  
 DE 6.00 usec  
 TE 300.0 K  
 SFO1 1.00000000 sec

===== CHANNEL f1 =====  
 NUC1 1H  
 P1 11.70 usec  
 PL1 0.00 dB  
 SFO1 299.8718518 MHz

F2 - Processing parameters  
 SI 32768  
 SF 299.8700247 MHz  
 WDW EM  
 SSB 0  
 LB 0.30 Hz  
 GB 0  
 PC 1.00

1D NMR plot parameters  
 CX 20.00 cm  
 F1P 11.000 ppm  
 F1 3298.57 Hz  
 F2P -1.000 ppm  
 F2 -299.87 Hz  
 PPMCM 0.60000 ppm/cm  
 HZCM 179.92201 Hz/cm

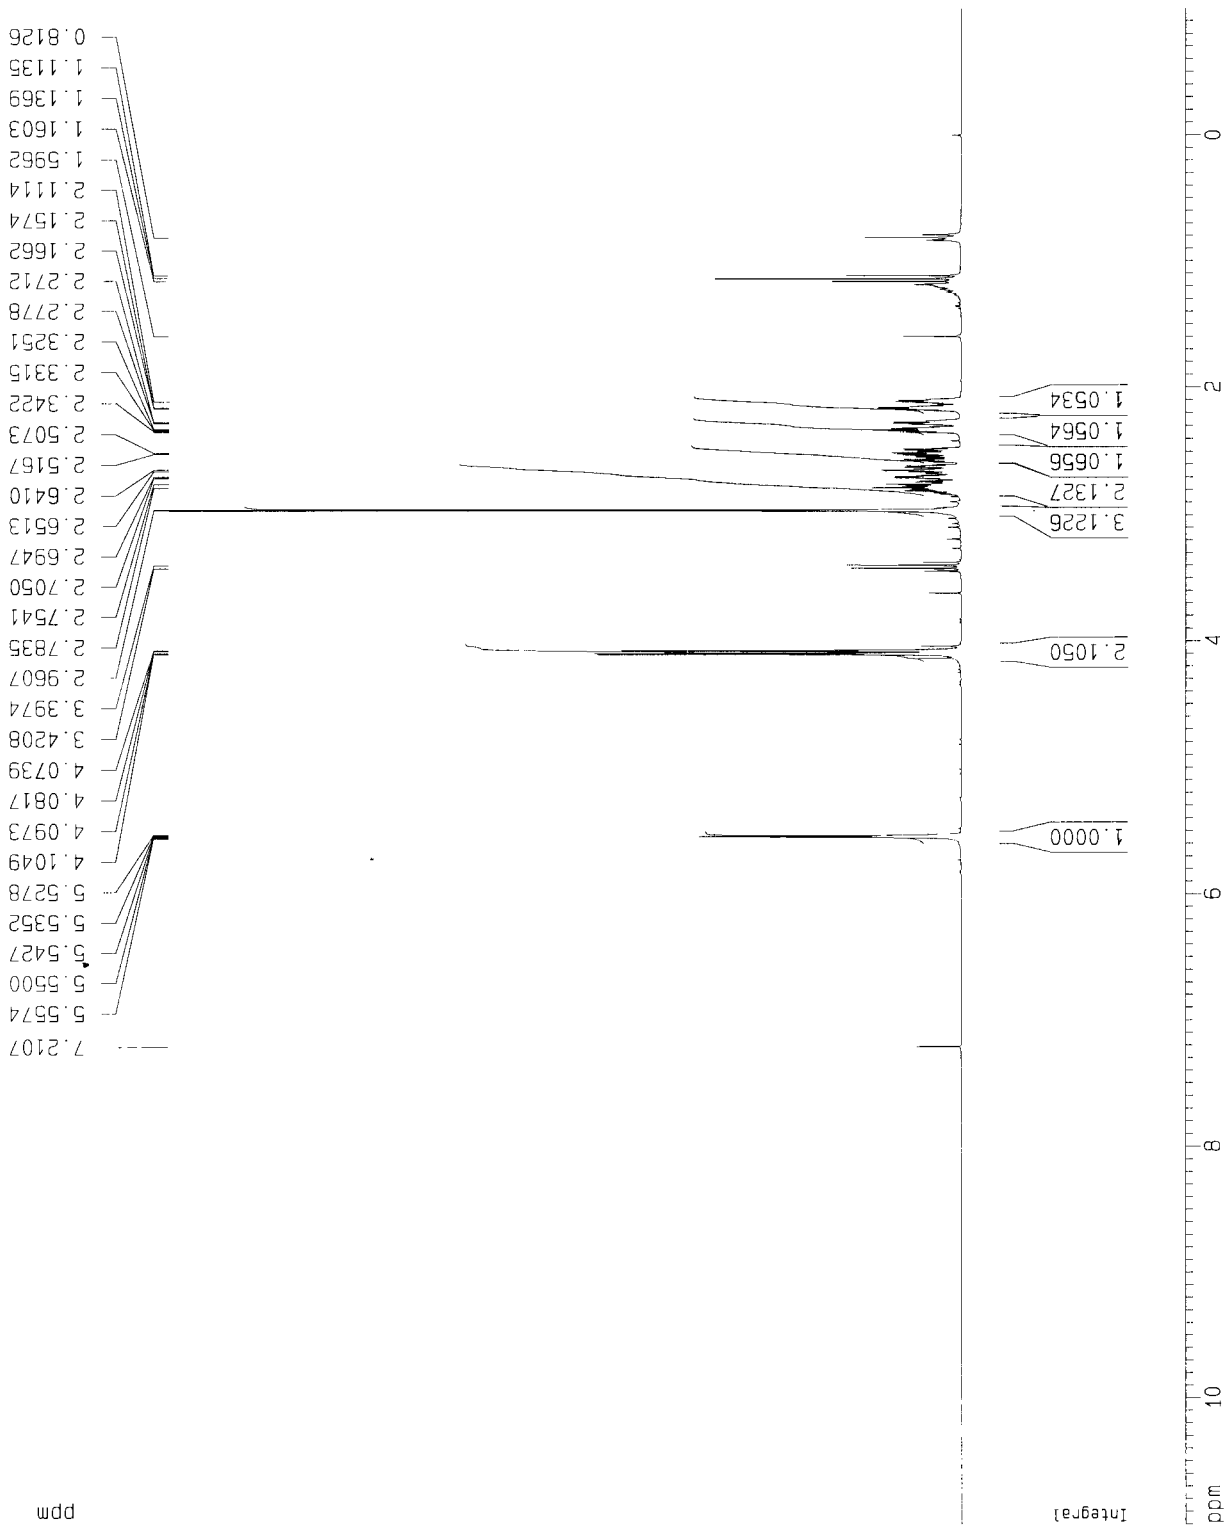

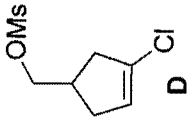

Current Data Parameters  
 NAME Dec05-2005-Ws.m  
 EXPNO 11  
 PROCNO 1

F2 - Acquisition Parameters  
 Date\_ 20051205  
 Time 17.34  
 INSTRUM Spect  
 PROBHD 5 mm GNP 1H/1  
 PULPROG zgpg30  
 TD 65536  
 SOLVENT CDCl3  
 NS 129  
 DS 4  
 SWH 18796.932 Hz  
 FIDRES 0.286819 Hz  
 AQ 1.7433076 sec  
 RG 2048  
 DH 26.600 usec  
 DE 6.00 usec  
 TE 300.0 K  
 D1 2.00000000 sec  
 D11 0.03000000 sec  
 D12 0.0002000 sec

===== CHANNEL f1 =====  
 NUC1 13C  
 P1 5.40 usec  
 PL1 -6.00 dB  
 SF01 75.4106357 MHz

===== CHANNEL f2 =====  
 CPDPRG2 waltz16  
 NUC2 1H  
 PCPD2 115.00 usec  
 PL2 0.00 dB  
 PL12 20.00 dB  
 PL13 20.00 dB  
 SF02 299.8711995 MHz

F2 - Processing parameters  
 SI 32768  
 SF 75.4023326 MHz  
 WDW EM  
 SSB 0  
 LB 1.00 Hz  
 GB 0  
 PC 1.40

1D NMR plot parameters  
 CX 20.00 cm  
 F1P 215.000 ppm  
 F1 16211.50 Hz  
 F2P -5.000 ppm  
 F2 -377.01 Hz  
 PPMCM 11.00000 ppm/cm  
 HZCM 829.42572 Hz/cm

40.473  
 37.936  
 36.538  
 34.536

78.029  
 77.605  
 77.480  
 72.646

131.338  
 125.417

ppm

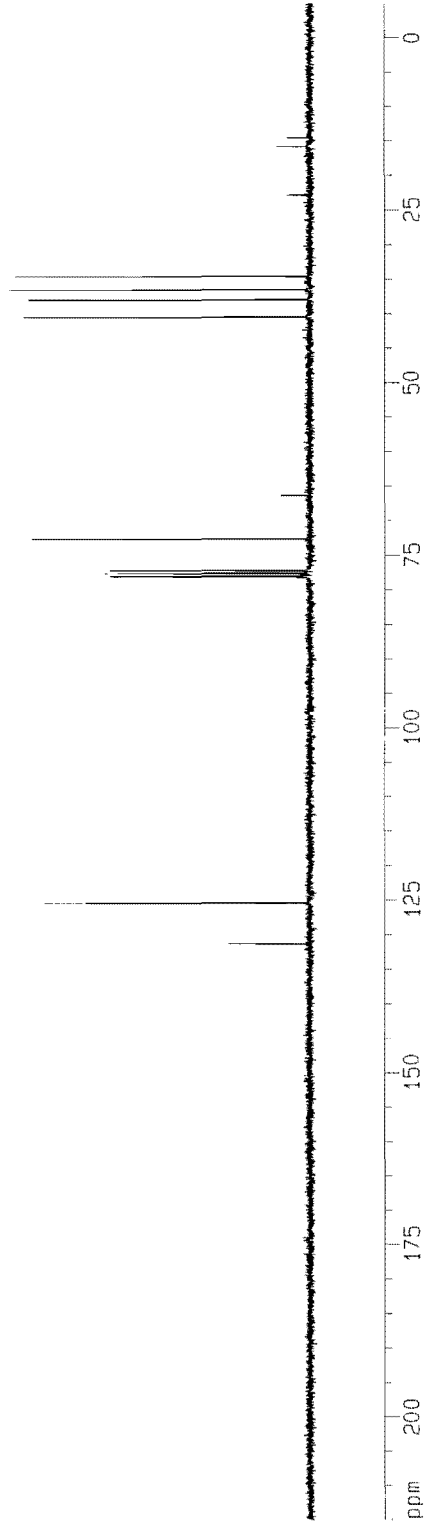

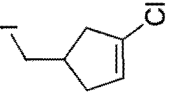

8

Current Data Parameters  
 NAME: Dec09-2006-wejn  
 EXPNO: 10  
 PROCNO: 1

F2 - Acquisition Parameters  
 Date\_: 20061208  
 Time: 12.08  
 INSTRUM: spect  
 PROBHD: 5 mm QNP 1H/1  
 PULPROG: zg30  
 TO: 65536  
 SOLVENT: CDCl3  
 NS: 16  
 DS: 2  
 SWH: 6172.839 Hz  
 FIDRES: 0.094190 Hz  
 AQ: 5.3084660 sec  
 RG: 128  
 DW: 81.000 usec  
 DE: 6.00 usec  
 TE: 300.0 K  
 D1: 1.00000000 sec

\*\*\*\*\* CHANNEL f1 \*\*\*\*\*  
 NUC1: 1H  
 P1: 11.70 usec  
 PL1: 0.00 dB  
 SFO1: 299.8718518 MHz

F2 - Processing parameters  
 SI: 32768  
 SF: 299.8700550 MHz  
 WDW: EM  
 SSB: 0  
 LB: 0.30 Hz  
 GB: 0  
 PC: 1.00

1D NMR plot parameters  
 CX: 20.00 cm  
 F1P: 11.000 ppm  
 F1: 3298.57 Hz  
 F2P: -1.000 ppm  
 F2: -299.87 Hz  
 PPMCM: 0.160000 ppm/cm  
 HZCM: 179.92203 Hz/cm

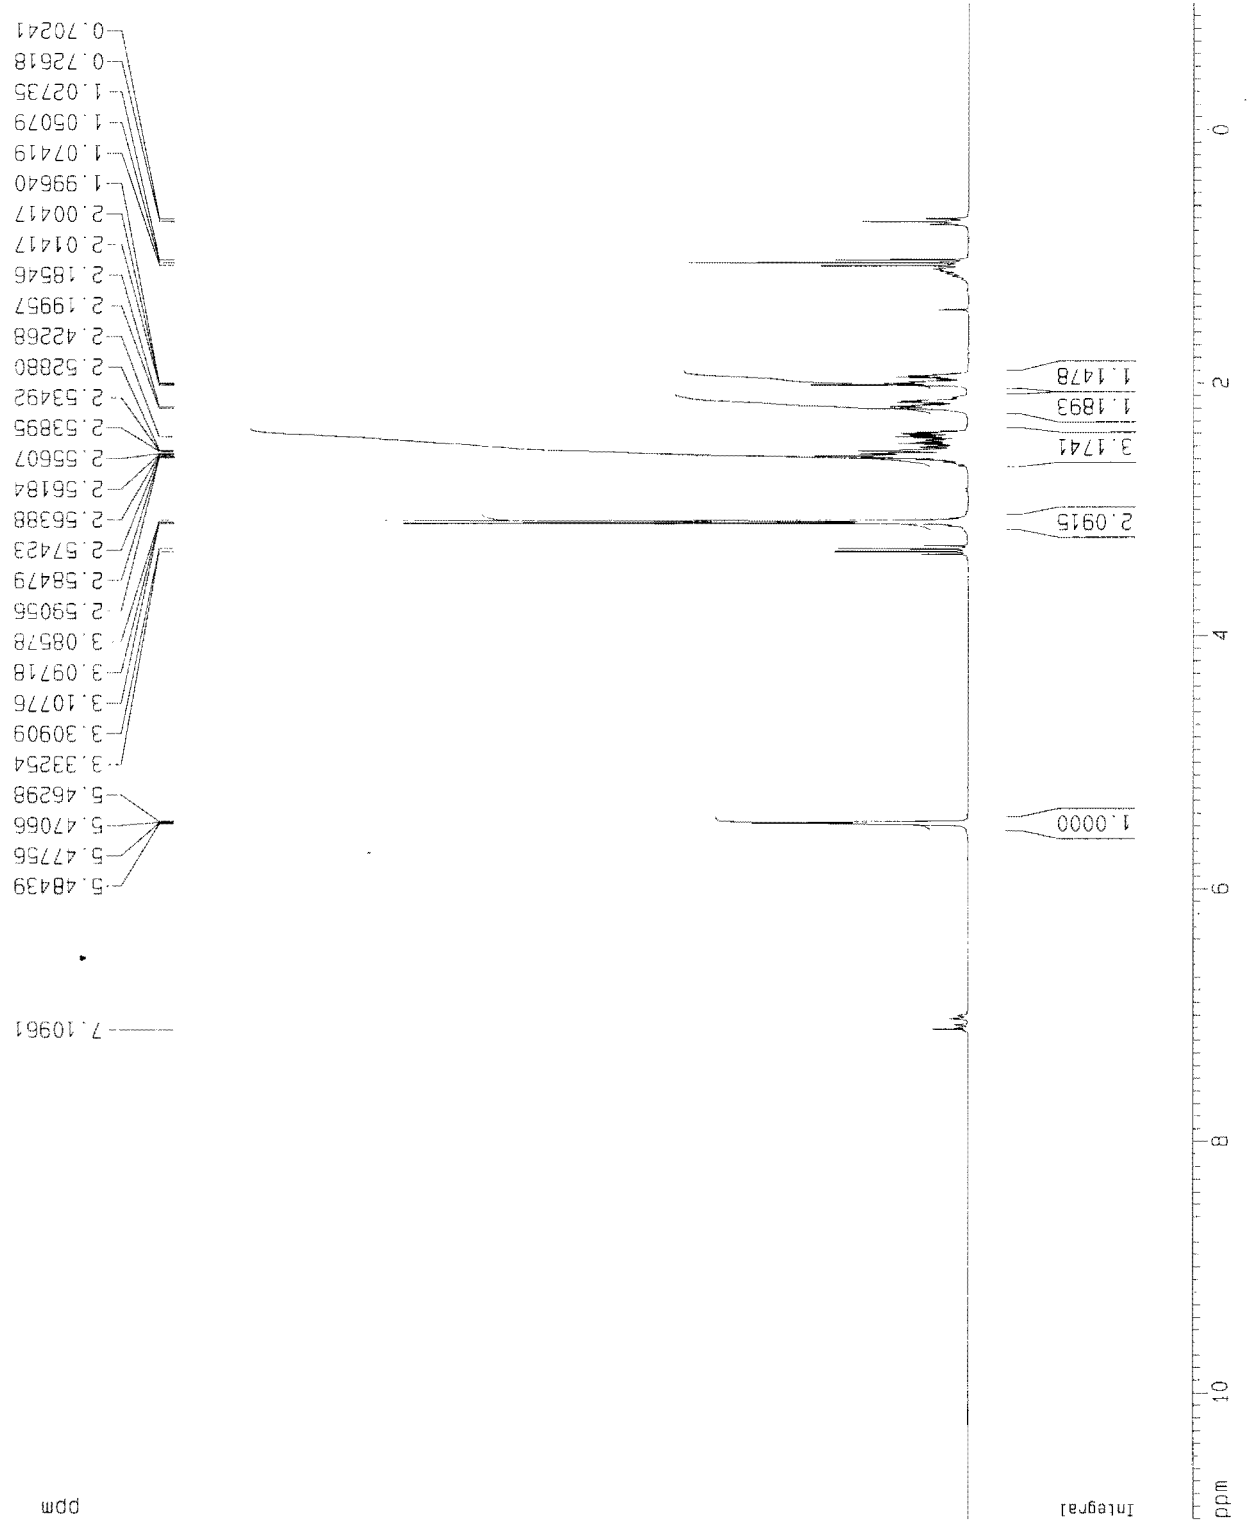



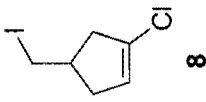

Current Data Parameters  
 NAME Dec09-2006-Weir  
 EXPNO 11  
 PROCNO 1

F2 - Acquisition Parameters  
 Date\_ 20061208  
 Time 12.16  
 INSTRUM spect  
 PROBHD 5 mm QNP 1H/1  
 PULPROG zgpg30  
 TD 65536  
 SOLVENT CDCl3  
 NS 110  
 DS 4  
 SWH 18796.992 Hz  
 FIDRES 0.286819 Hz  
 AQ 1.7433076 sec  
 RG 4096  
 DM 26.600 uSsec  
 DE 6.00 uSsec  
 TE 300.0 K  
 D1 2.0000000 sec  
 D11 0.0300000 sec  
 D12 0.0002000 sec

===== CHANNEL f1 =====  
 NUC1 13C  
 P1 5.40 usec  
 PL1 -6.00 dB  
 SF01 75 4106357 MHz

===== CHANNEL f2 =====  
 CPDPRG2 waltz16  
 NUC2 1H  
 PCPD2 115.00 usec  
 PL2 0.00 dB  
 PL12 20.00 dB  
 PL13 20.00 dB  
 SF02 299 8711995 MHz

F2 - Processing parameters  
 SI 32768  
 SF 4023410 MHz  
 WDW EM  
 SSB 0  
 LB 1.00 Hz  
 GB 0  
 PC 1.40

1D NMR plot parameters  
 CX 20.00 cm  
 FIP 215.000 ppm  
 F1 16211.50 Hz  
 F2 -5.000 ppm  
 F2 -377.01 Hz  
 PPMCM 11.00000 ppm/cm  
 HZCM 829.42678 Hz/cm

131.186  
 125.665  
 77.904  
 77.480  
 77.057  
 44.785  
 39.948  
 39.061  
 13.649

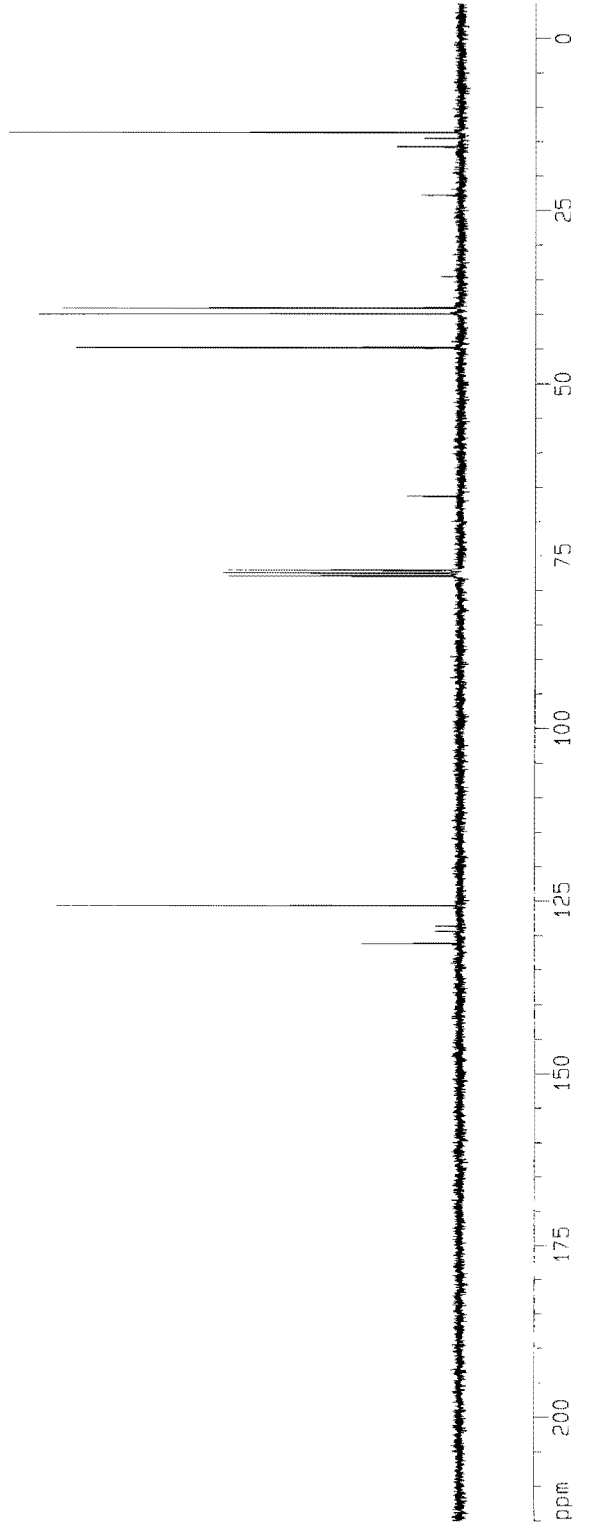

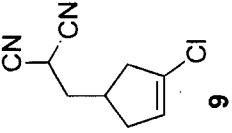

Current Data Parameters  
 NAME Sep23-2007-we.in  
 EXPNO 10  
 PROCNO 1

F2 - Acquisition Parameters  
 Date\_ 20070923  
 Time 11.28  
 INSTRUM spect  
 PROBHD 5 mm QNP 1H/1  
 PULPROG zg30  
 TD 65536  
 SOLVENT CDCl3  
 NS 16  
 DS 2  
 SWH 6172.839 Hz  
 FIDRES 0.094190 Hz  
 AQ 5.3084660 sec  
 RG 57  
 DW 81.000 usec  
 DE 6.00 usec  
 TE 300.0 K  
 D1 1.00000000 sec

==== CHANNEL f1 =====  
 NUC1 1H  
 P1 11.70 usec  
 PL1 0.00 dB  
 SF01 299.871851B MHz

F2 - Processing parameters  
 SI 32768  
 SF 299.8700541 MHz  
 WDM EM  
 SSB 0  
 LB 0.30 Hz  
 GB 0  
 PC 1.00

1D NMR plot parameters  
 CX 20.00 cm  
 F1P 11.000 ppm  
 F1 3298.57 Hz  
 F2P -1.000 ppm  
 F2 -299.87 Hz  
 PPMCM 0.60000 ppm/cm  
 HZCM 179.92203 Hz/cm

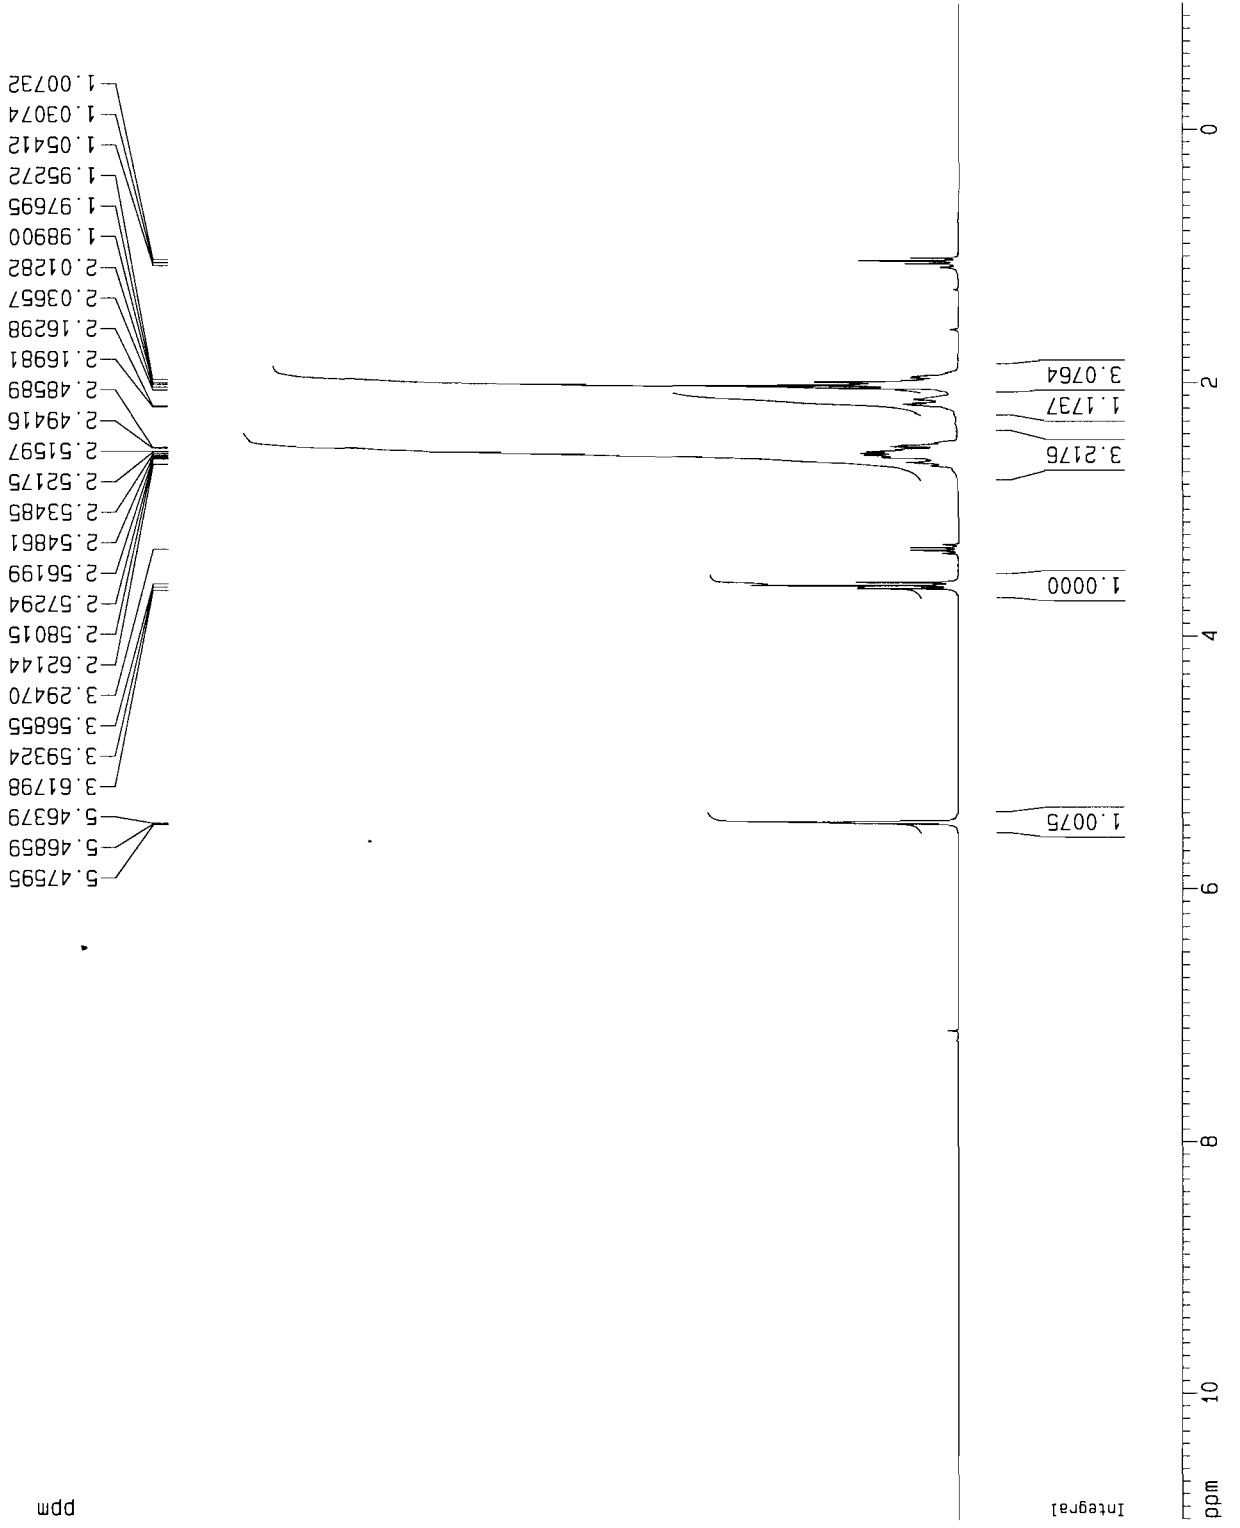

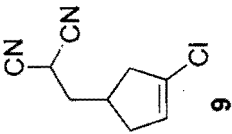

Current Data Parameters  
 NAME Sep23-2007-Wein  
 EXPNO 11  
 PROCNO 1

F2 - Acquisition Parameters

Date\_ 20070923  
 Time 11.37  
 INSTRUM spect  
 PROBHD 5 mm QNP 1H/1  
 PULPROG zgpg30  
 TO 65536  
 SOLVENT CDCl3  
 NS 122  
 OS 4  
 SMH 18796.992 Hz  
 FIDRES 0.286819 Hz  
 AQ 1.7433076 sec  
 RG 1824.6  
 DW 26.600 usec  
 DE 6.00 usec  
 TE 300.0 K  
 D1 2.00000000 sec  
 D11 0.03000000 sec  
 D12 0.00002000 sec

==== CHANNEL f1 =====  
 NUC1 13C  
 P1 5.40 usec  
 PL1 -6.00 dB  
 SF01 75.4106357 MHz

==== CHANNEL f2 =====  
 CPDPRG2 waltz16  
 NUC2 1H  
 PCPD2 115.00 usec  
 PL2 0.00 dB  
 PL12 20.00 dB  
 PL13 20.00 dB  
 SF02 299.8711995 MHz

F2 - Processing parameters  
 SI 32768  
 SF 75.4024082 MHz  
 WDW EM  
 SSB 0  
 LB 1.00 Hz  
 GB 0  
 PC 1.40

ID NMR plot parameters  
 CX 20.00 cm  
 F1P 215.000 ppm  
 F1 16211.52 Hz  
 F2P -5.000 ppm  
 F2 -377.01 Hz  
 PPMCM 11.00000 ppm/cm  
 HZCM 829.42645 Hz/cm

42.117  
 36.558  
 35.897  
 34.427  
 20.976

77.181  
 76.756  
 76.331

130.264  
 124.599  
 112.165

ppm

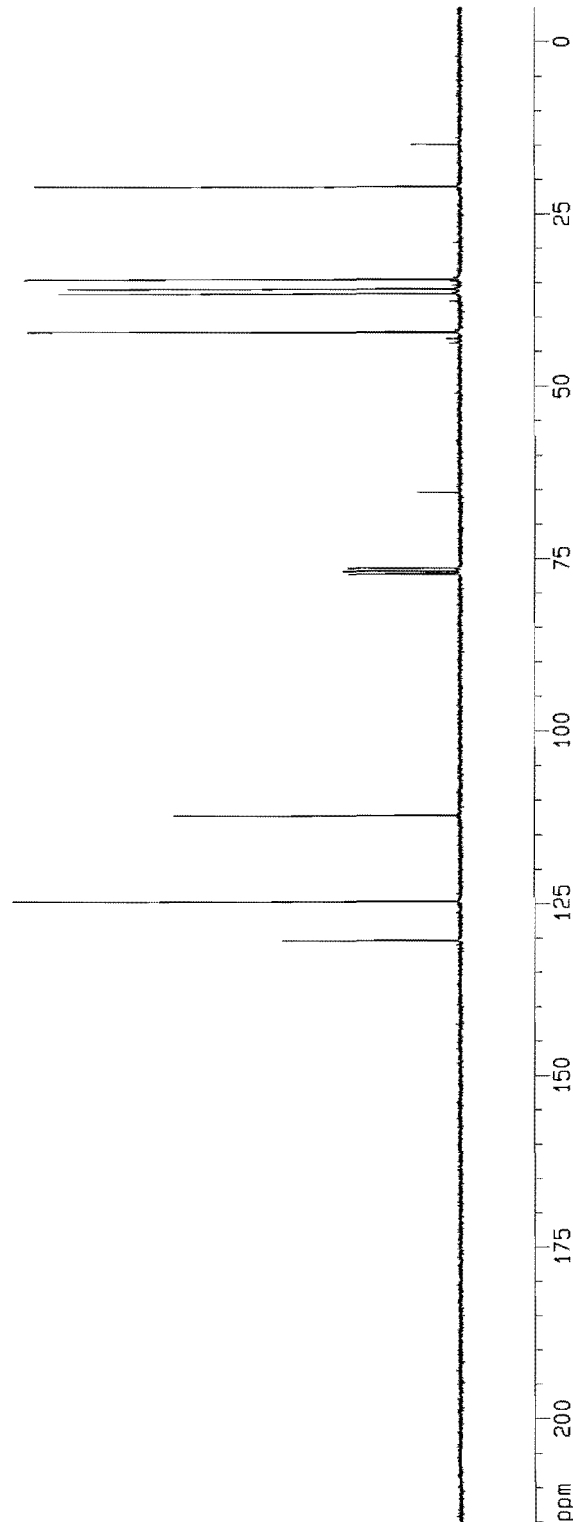

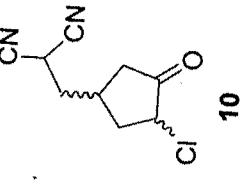

Current Data Parameters  
 NAME Sep24-2007-wejn  
 EXPNO 10  
 PROCNO 1

F2 - Acquisition Parameters  
 Date\_ 20070924  
 Time 20.04  
 INSTRUM spect  
 PROBHD 5 mm QNP 1H/1  
 PULPROG zg30  
 TD 65536  
 SOLVENT CDCl3  
 NS 15  
 DS 2  
 SWH 6172.839 Hz  
 FIDRES 0.094190 Hz  
 AQ 5.3084660 sec  
 RG 645.1  
 DW 81.000 usec  
 DE 6.00 usec  
 TE 300.0 K  
 D1 1.00000000 sec

===== CHANNEL f1 =====  
 NUC1 1H  
 P1 11.70 usec  
 PL1 0.00 dB  
 SF01 299.6718518 MHz

F2 - Processing parameters  
 SI 32768  
 SF 299.8700295 MHz  
 WDW EM  
 SSB 0  
 LB 0.30 Hz  
 GB 0  
 PC 1.00

10 NMR plot parameters  
 CX 20.00 cm  
 F1P 11.000 ppm  
 F1 3298.57 Hz  
 F2P -1.000 ppm  
 F2 -299.67 Hz  
 PPMCM 0.60000 ppm/cm  
 HZCM 179.92201 Hz/cm

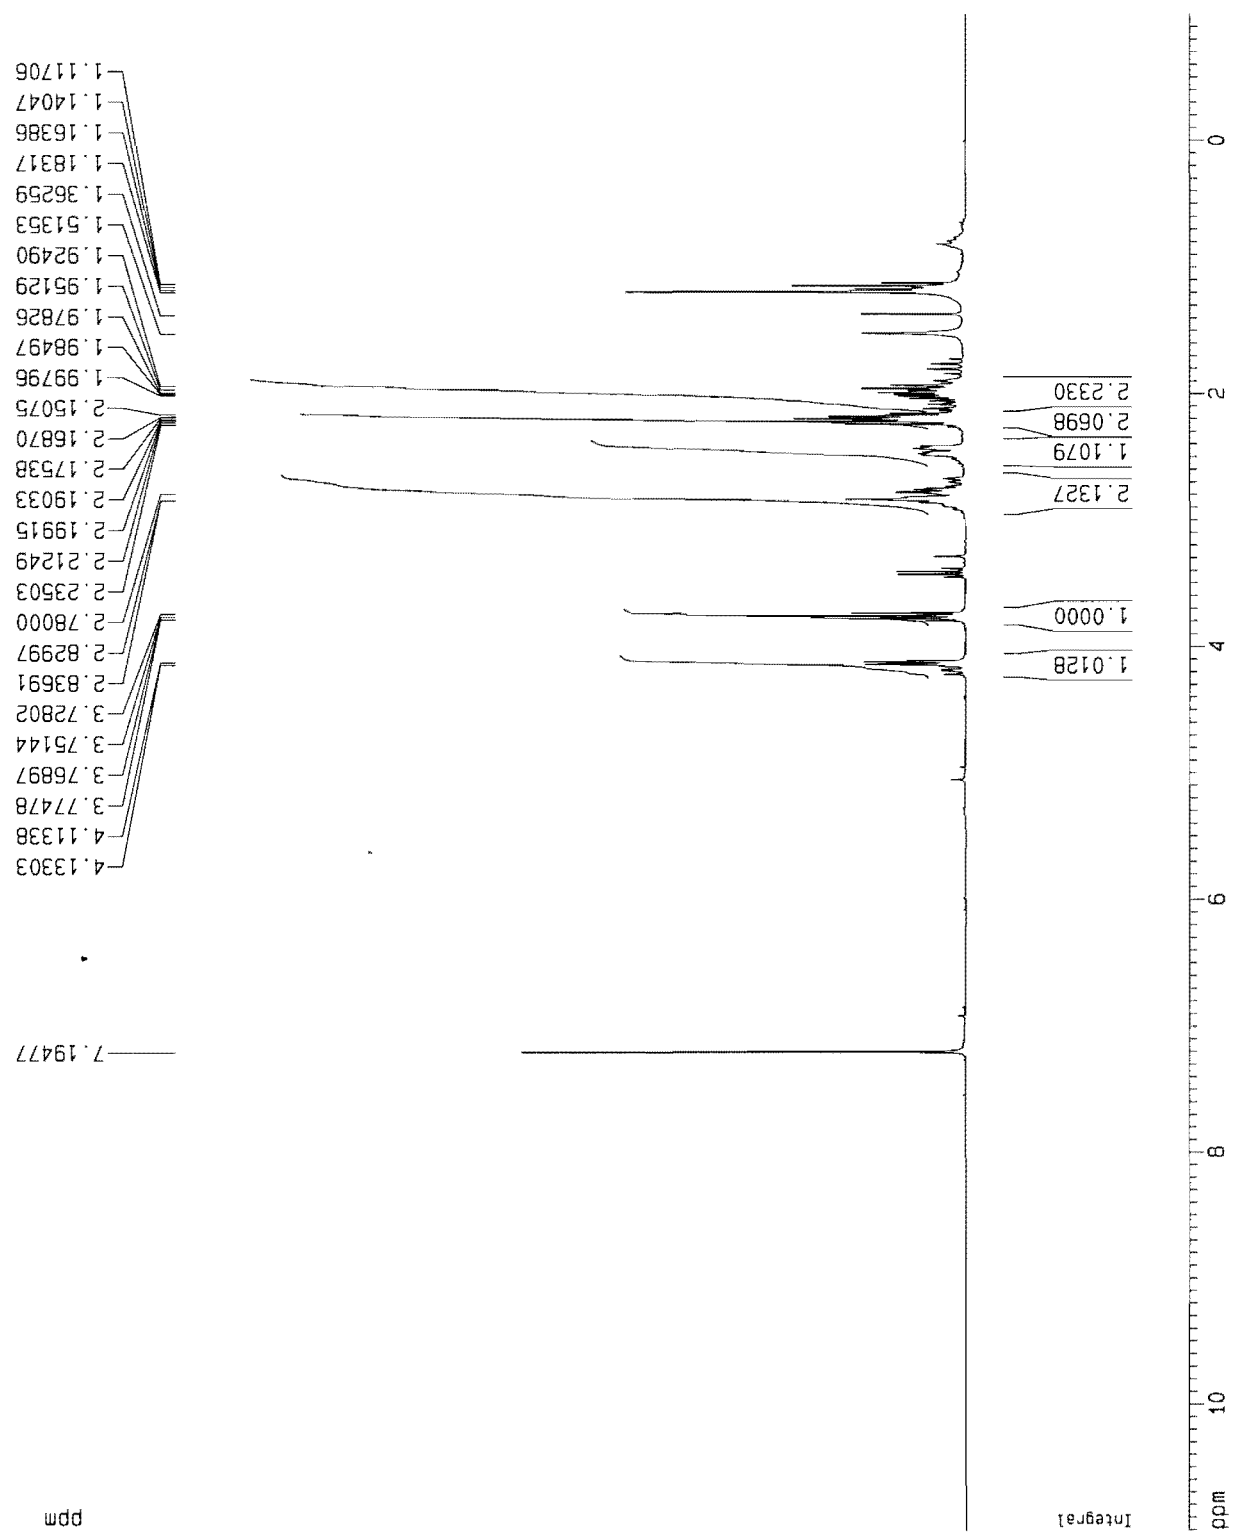

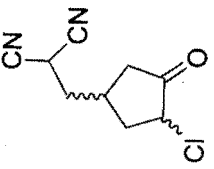

10

Current Data Parameters  
 NAME Sep24-2007-Me1n  
 EXPNO 10  
 PROCNO 1

F2 - Acquisition Parameters  
 Date\_ 20070924  
 Time 21.08  
 INSTRUM spect  
 PROBHD 5 mm Multinu  
 PULPROG zgpg30  
 TD 65536  
 SOLVENT CDCl3  
 NS 1745  
 DS 4  
 SWH 18832.393 Hz  
 FIDRES 0.287360 Hz  
 AQ 1.7400308 sec  
 RG 16384  
 DW 26.550 usec  
 DE 6.00 usec  
 TE 300.0 K  
 D1 2.00000000 sec  
 d11 0.03000000 sec  
 d12 0.00002000 sec

===== CHANNEL f1 =====  
 NUC1 13C  
 P1 11.80 usec  
 PL1 0.00 dB  
 SF01 75.4760200 MHz

===== CHANNEL f2 =====  
 CPDPRG2 waltz16  
 NUC2 1H  
 PCPD2 110.00 usec  
 PL2 0.00 dB  
 PL12 17.50 dB  
 PL13 17.50 dB  
 SF02 300.1312005 MHz

F2 - Processing parameters  
 SI 32768  
 SF 75.4677190 MHz  
 WDM 0  
 SSB 0  
 LB 1.00 Hz  
 GB 0  
 PC 1.40

1D NMR plot parameters  
 CX 20.00 cm  
 F1P 245.000 ppm  
 F1 16225.56 Hz  
 F2P -5.000 ppm  
 F2 -377.34 Hz  
 PPMCM 11.00000 ppm/cm  
 HZCM 830.14490 Hz/cm

21.685  
 21.838  
 30.099  
 31.089  
 31.948  
 36.132  
 36.337  
 39.232  
 39.537  
 41.334  
 41.463  
 56.671  
 58.310  
 76.996  
 77.419  
 77.622  
 77.842

112.342

207.327  
 ppm

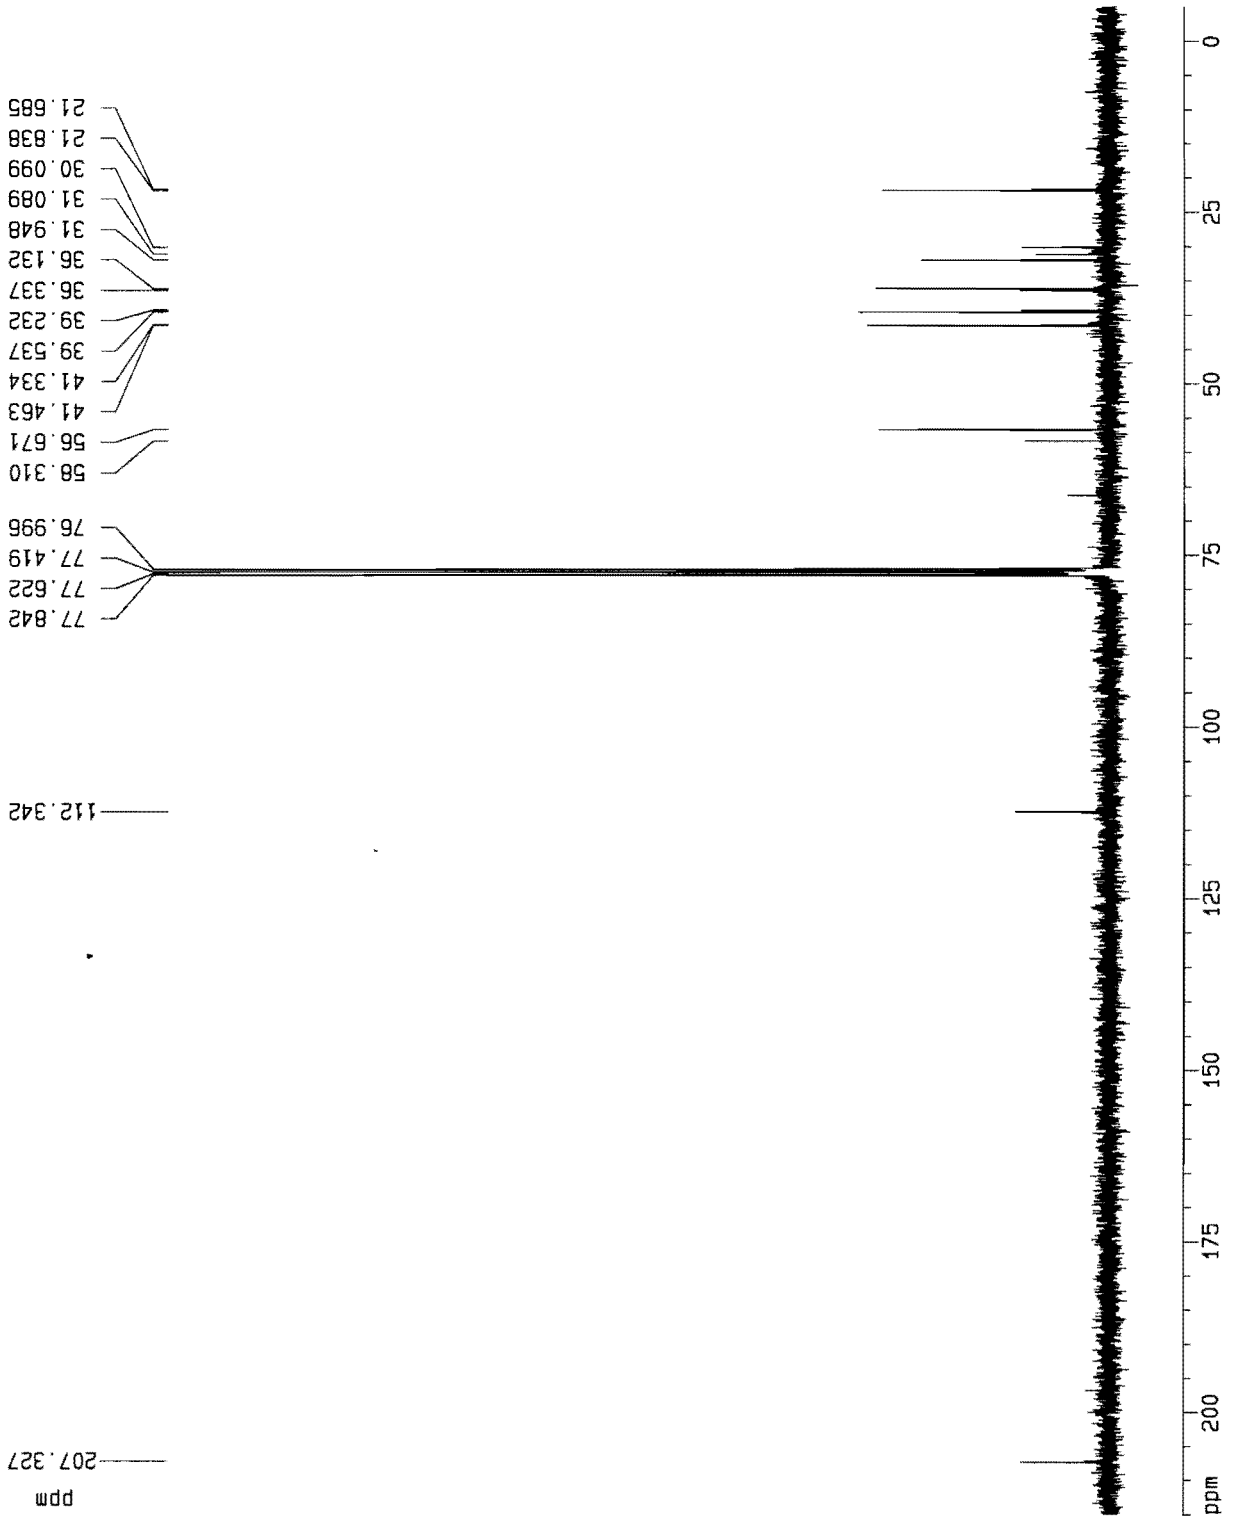

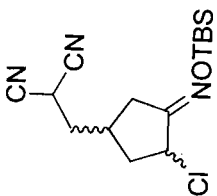

Current Data Parameters  
 NAME Oct03-2007-Me.in  
 EXPNO 10  
 PROCNO 1

F2 - Acquisition Parameters  
 Date\_ 20071003  
 Time 18.25  
 INSTRUM spect  
 PROBHD 5 mm QNP 1H/1  
 PULPROG zg30  
 TO 65536  
 SOLVENT CDCl3  
 NS 16  
 DS 2  
 SWH 6172.839 Hz  
 FIDRES 0.094190 Hz  
 AQ 5.3084660 sec  
 RG 101.6  
 DW 81.000 usec  
 DE 6.00 usec  
 TE 300.0 K  
 D1 1.00000000 sec

==== CHANNEL f1 =====

NUC1 1H  
 P1 11.70 usec  
 PL1 0.00 dB  
 SF01 299.8718518 MHz

F2 - Processing parameters  
 SI 32768  
 SF 299.8700603 MHz  
 WDW EM  
 SSB 0  
 LB 0.30 Hz  
 GB 0  
 PC 1.00

1D NMR plot parameters  
 CX 20.00 cm  
 F1P 11.000 ppm  
 F1 3298.57 Hz  
 F2P -1.000 ppm  
 F2 -299.87 Hz  
 PPMCM 0.60000 ppm/cm  
 HZCM 179.92203 Hz/cm

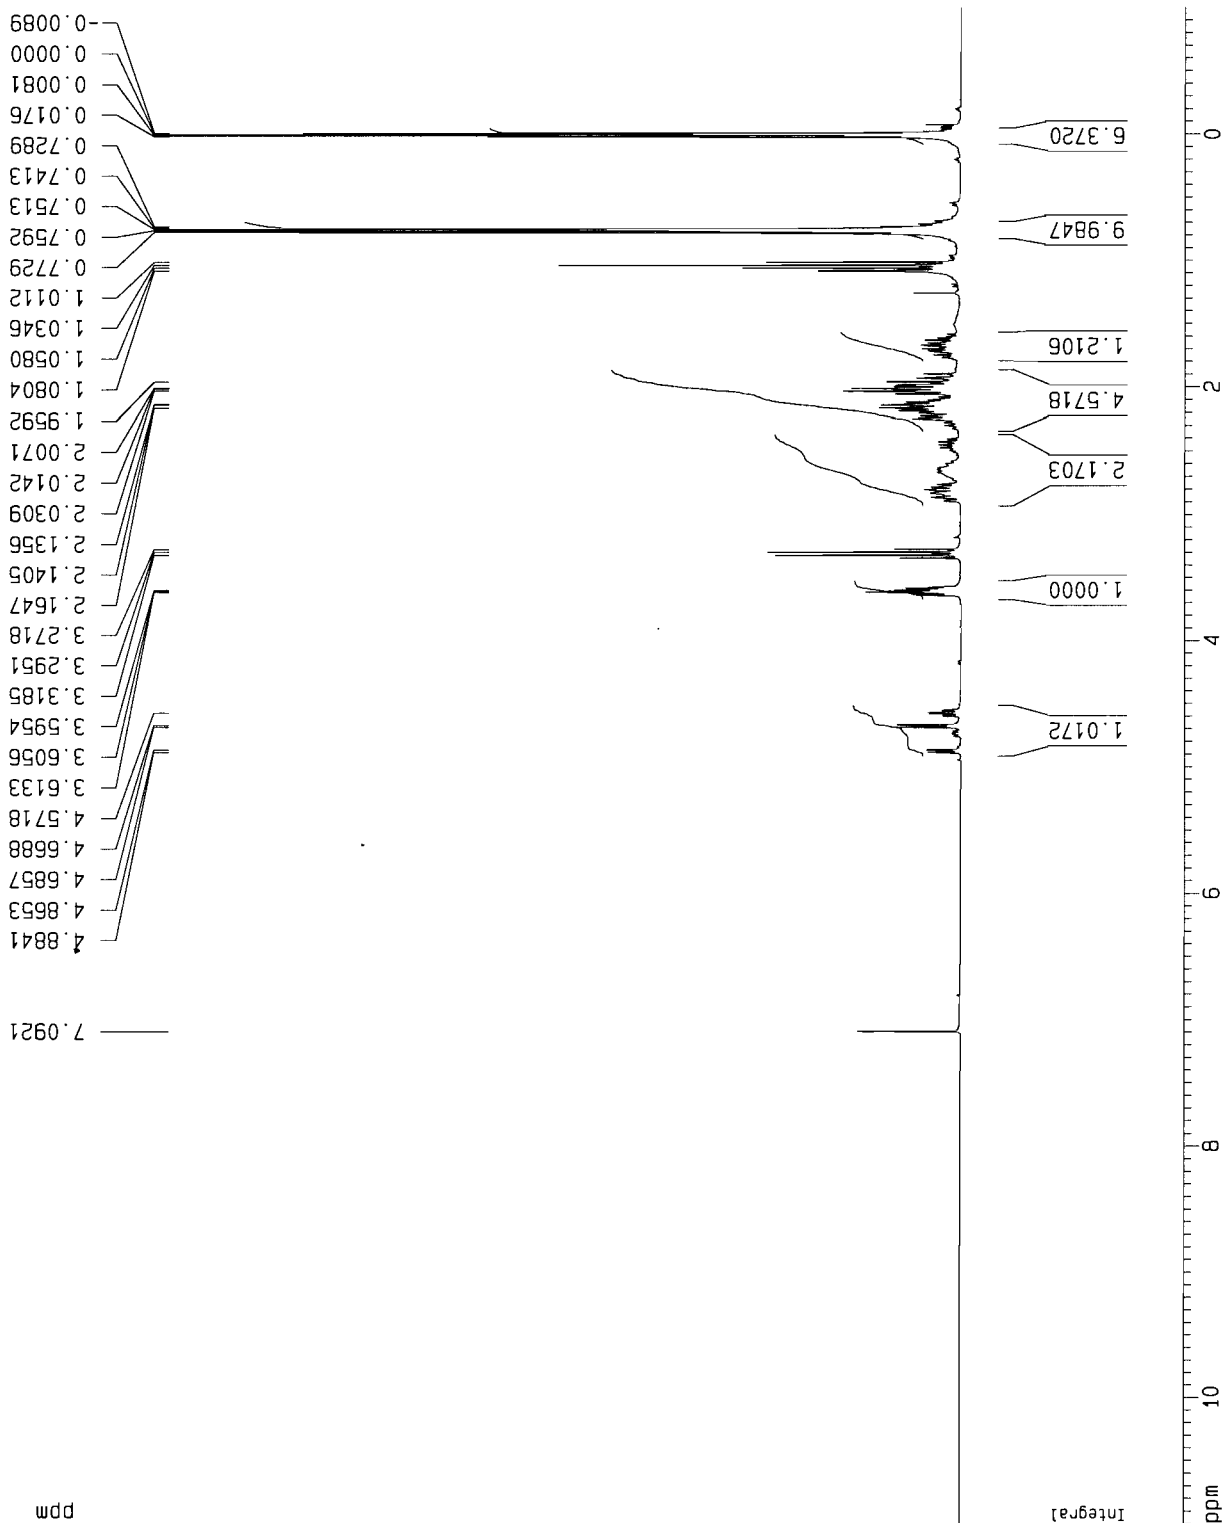

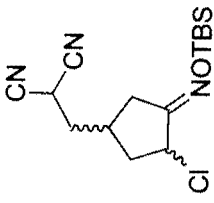

11

Current Data Parameters  
 NAME Oct03-2007-Wein  
 EXPNO 12  
 PROCNO 1

F2 - Acquisition Parameters

Date\_ 20071003  
 Time 18.49  
 INSTRUM spect  
 PROBHD 5 mm QNP 1H/1  
 PULPROG zgpg30  
 TD 65536  
 SOLVENT CDCl3  
 NS 770  
 DS 4  
 SWH 18796.992 Hz  
 FIDRES 0.286819 Hz  
 AQ 1.7433075 sec  
 RG 2048  
 DM 26.600 usec  
 DE 6.00 usec  
 TE 300.0 K  
 D1 2.00000000 sec  
 D11 0.03000000 sec  
 D12 0.00002000 sec

===== CHANNEL f1 =====  
 NUC1 13C  
 P1 5.40 usec  
 PL1 -6.00 dB  
 SFD1 75.4106357 MHz

===== CHANNEL f2 =====  
 CPDPRG2 Waltz16  
 NUC2 1H  
 PCPD2 115.00 usec  
 PL2 0.00 dB  
 PL12 20.00 dB  
 PL13 20.00 dB  
 SF02 299.8711995 MHz

F2 - Processing parameters  
 SI 32768  
 SF 75.4023410 MHz  
 WDW EM  
 SSB 0  
 LB 1.00 Hz  
 GB 0  
 PC 1.40

1D NMR plot parameters  
 CX 20.00 cm  
 F1P 215.000 ppm  
 F1 16211.50 Hz  
 F2P -5.000 ppm  
 F2 -377.01 Hz  
 PPMCM 11.00000 ppm/cm  
 HZCM 829.42578 Hz/cm

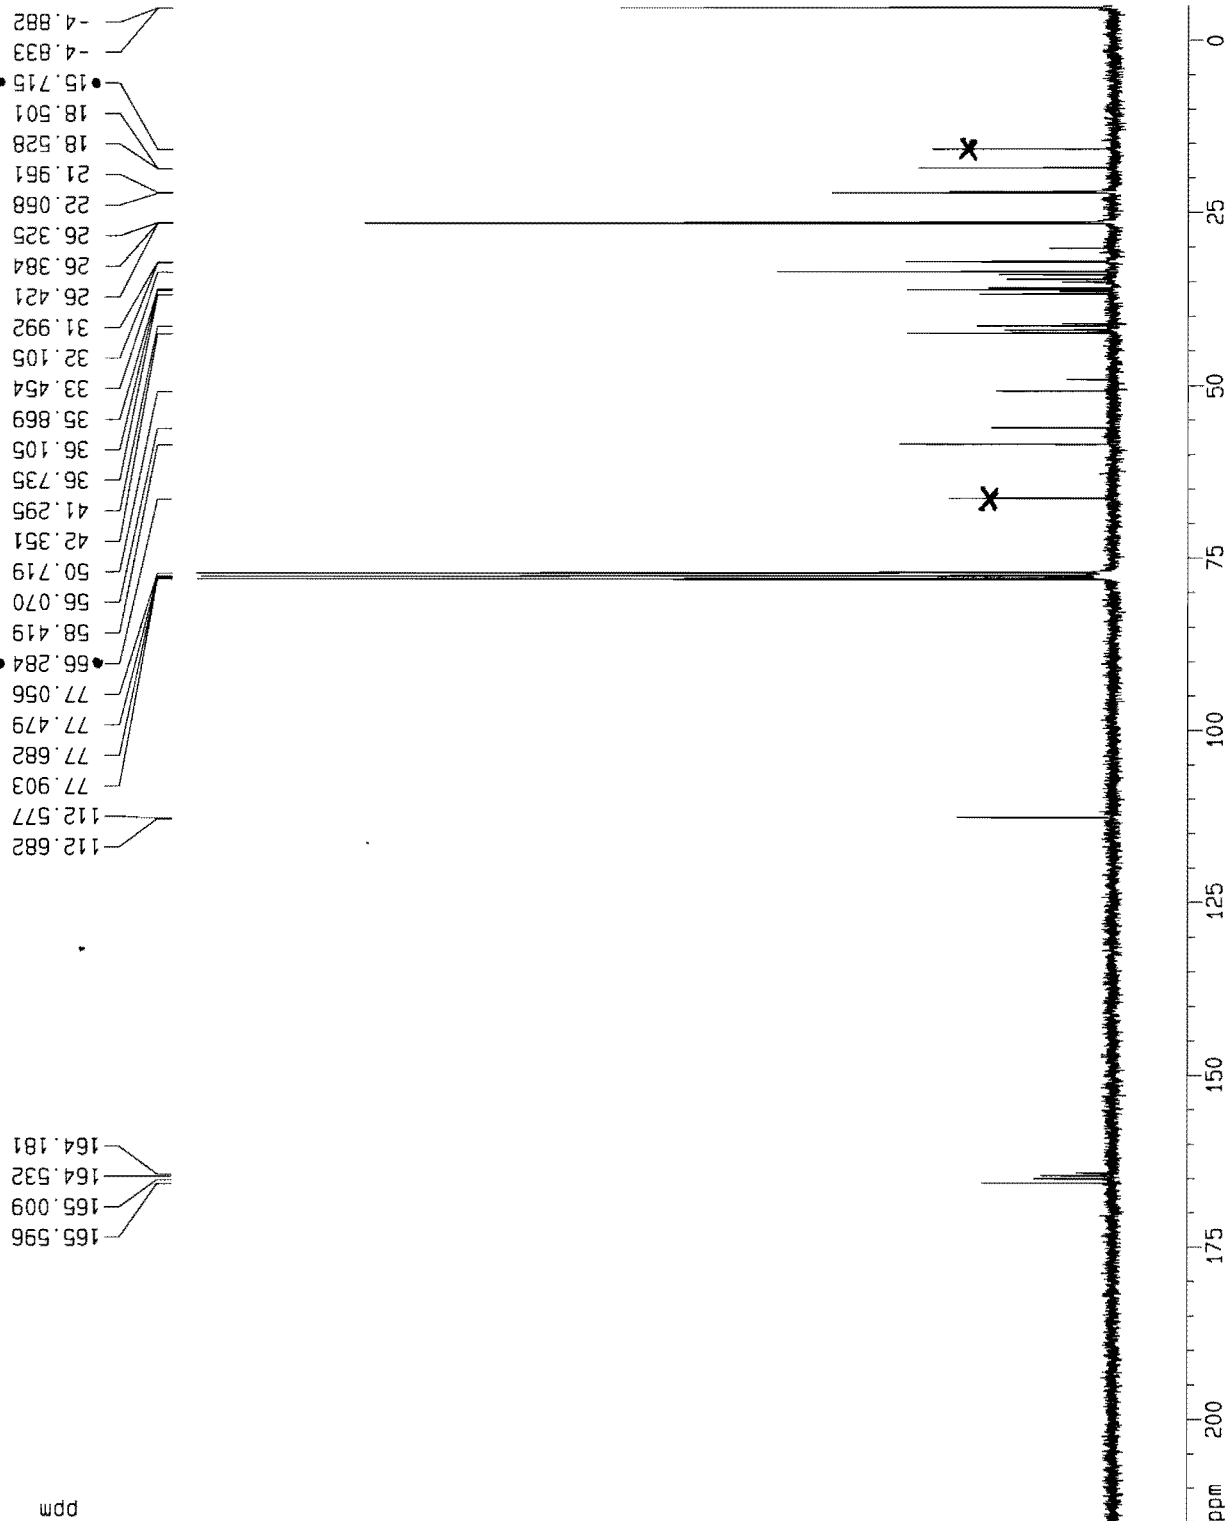

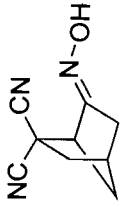

13

Current Data Parameters

NAME Sep27-2007-Me.in  
 EXPNO 10  
 PROCNO 1

F2 - Acquisition Parameters

Date\_ 20070927  
 Time 23.34  
 INSTRUM spect  
 PROBHD 5 mm Multinu  
 PULPROG zg30  
 TD 65536  
 SOLVENT CDC13  
 NS 52  
 DS 0  
 SMH 6172.839 Hz  
 FIDRES 0.094190 Hz  
 AQ 5.3084660 sec  
 RG 574.7  
 DW 81.000 usec  
 DE 6.00 usec  
 TE 300.0 K  
 D1 2.00000000 sec

===== CHANNEL f1 =====

NUC1 1H  
 P1 9.60 usec  
 PL1 -6.00 dB  
 SF01 300.1318534 MHz

F2 - Processing parameters

SI 32768  
 SF 300.1300534 MHz  
 WDW EM  
 SSB 0  
 LB 0.30 Hz  
 GB 0  
 PC 1.00

1D NMR plot parameters

CX 20.00 cm  
 F1P 11.000 ppm  
 F1 3301.43 Hz  
 F2P -1.000 ppm  
 F2 -300.13 Hz  
 PPMCM 0.60000 ppm/cm  
 HZCM 180.07803 Hz/cm

3.3749  
 3.3707  
 3.3399  
 2.6884  
 2.6833  
 2.4181  
 2.3367  
 2.3262  
 2.3221  
 2.3221  
 2.1778  
 2.1668  
 2.0552  
 2.0465  
 2.0103  
 2.0017  
 1.8575  
 1.8520  
 1.8466  
 1.7849  
 1.7801  
 1.7763  
 1.0925  
 0.7549  
 0.0000  
 -0.0579

7.1033

ppm

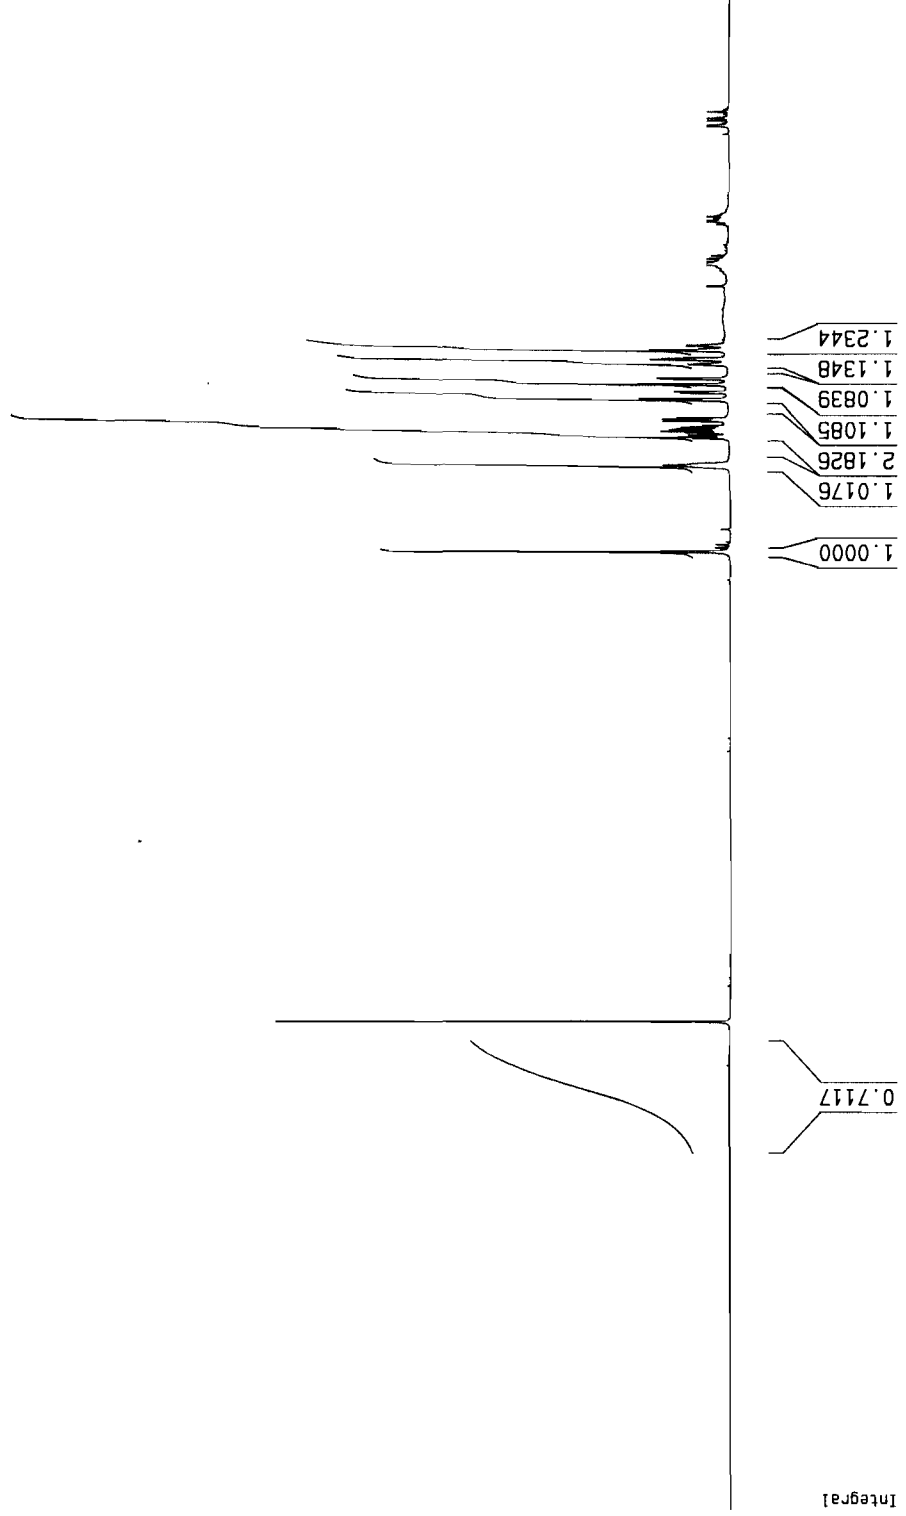

Integral  
 0.7117  
 1.0176  
 1.1085  
 1.0839  
 1.1348  
 1.2344  
 1.0000



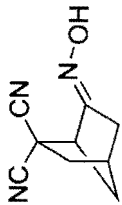

13

Current Data Parameters  
 NAME Sep27-2007-MeIn  
 EXPNO 12  
 PROCNO 1

F2 - Acquisition Parameters  
 Date\_ 20070928  
 Time 0.01  
 INSTRUM spect  
 PROBHD 5 mm Multinu  
 PULPROG zgpg30  
 TD 65536  
 SOLVENT CDCl3  
 NS 8532  
 DS 4  
 SWH 18832.393 Hz  
 FIDRES 0.287360 Hz  
 AQ 1.7400308 sec  
 RG 16384  
 DM 26.550 usec  
 DE 6.00 usec  
 TE 300.0 K  
 O1 2.0000000 sec  
 d11 0.03000000 sec  
 d12 0.00002000 sec

===== CHANNEL f1 =====  
 NUC1 13C  
 P1 11.80 usec  
 PL1 0.00 dB  
 SF01 75.4760200 MHz

===== CHANNEL f2 =====  
 CPDPRG2 waltz16  
 NUC2 1H  
 PCPD2 110.00 usec  
 PL2 0.00 dB  
 PL12 17.50 dB  
 PL13 17.50 dB  
 SF02 300.1312005 MHz

F2 - Processing parameters  
 SI 32768  
 SF 75.4678482 MHz  
 HDW EM  
 SSB 0  
 LB 1.00 Hz  
 GB 0  
 PC 1.40

ID NMR plot parameters  
 CX 20.00 cm  
 F1P 215.000 ppm  
 F1 16225.59 Hz  
 F2P -5.000 ppm  
 F2 -377.34 Hz  
 PPMCM 11.00000 ppm/cm  
 HZCM 830.14636 Hz/cm

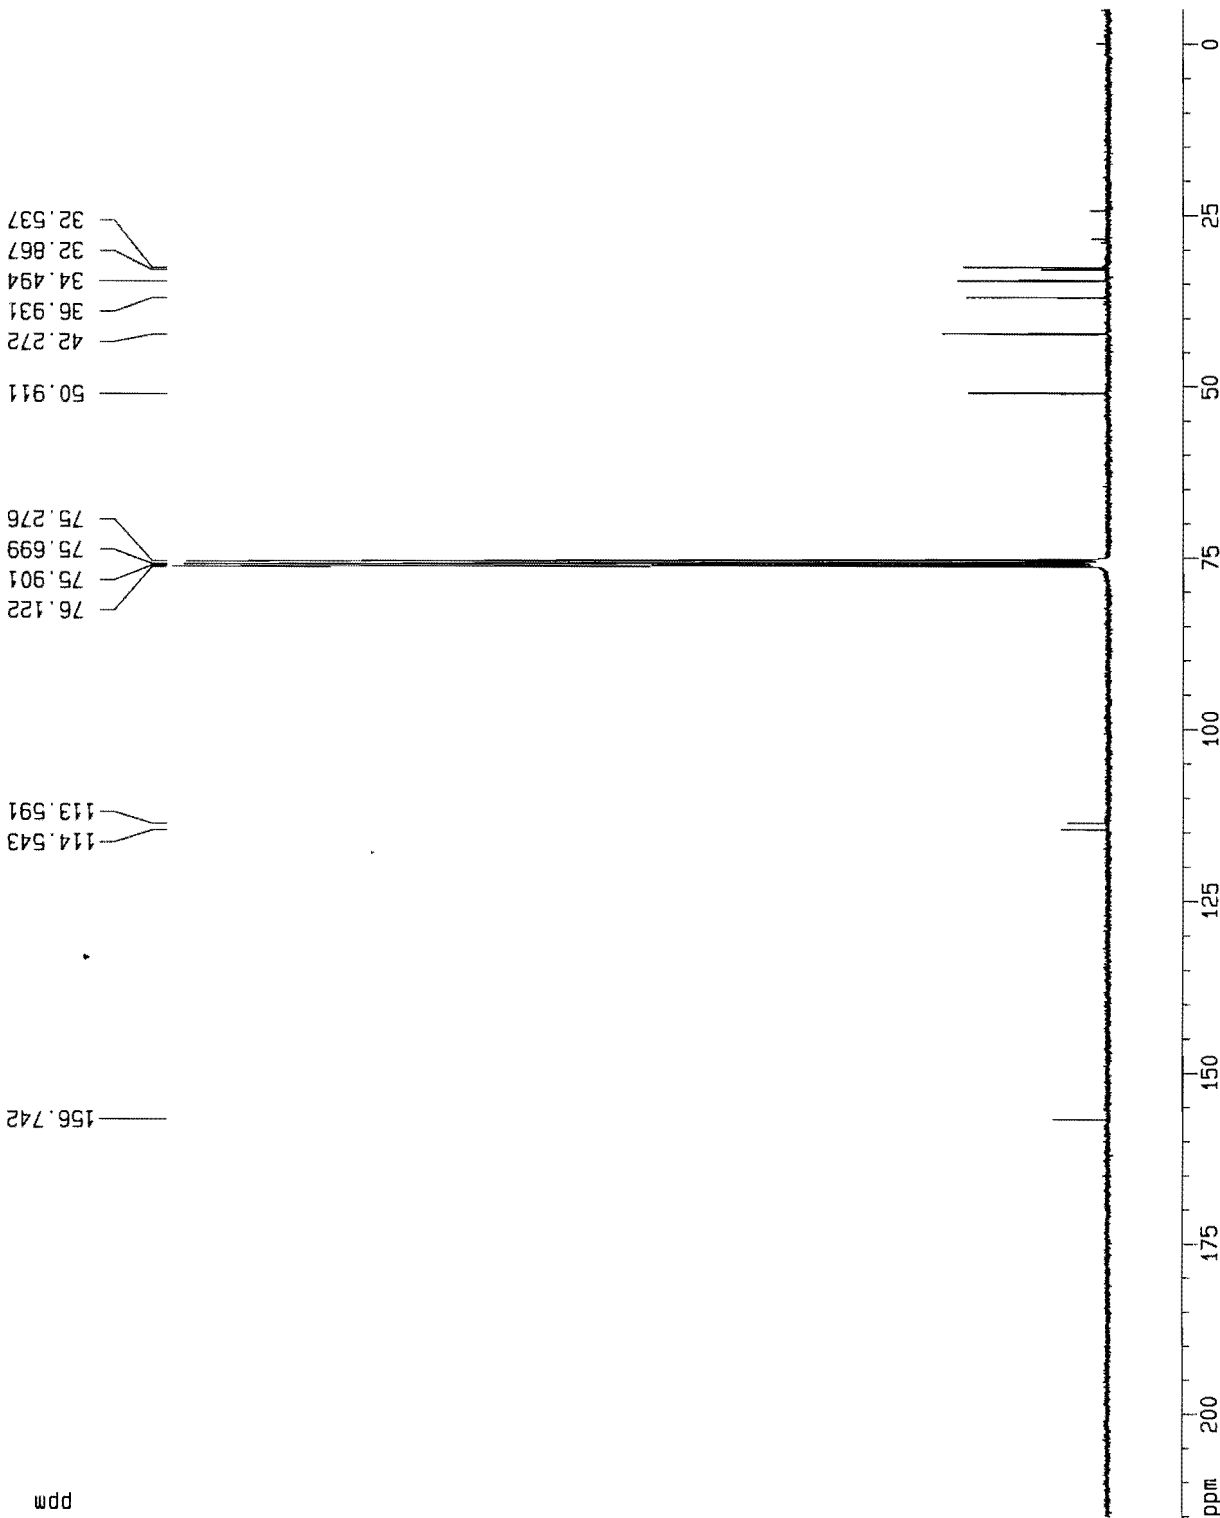

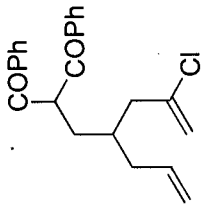

**15a**

Current Data Parameters  
 NAME Nov04-2007-we1n  
 EXPND 10  
 PRODCNO 1

F2 - Acquisition Parameters  
 Date\_ 20071104  
 Time 16.22  
 INSTRUM spect  
 PROBDH 5 mm QNP 1H/1  
 PULPROG zg30  
 TD 65536  
 SOLVENT CDCl3  
 NS 16  
 DS 2  
 SWH 6172.839 Hz  
 FIDRES 0.094190 Hz  
 AQ 5.3084660 sec  
 RG 80.6  
 OW 81.000 usec  
 DE 6.00 usec  
 TE 300.0 K  
 D1 1.00000000 sec

==== CHANNEL f1 =====  
 NUC1 1H  
 P1 11.70 usec  
 PL1 0.00 dB  
 SFO1 299.8718518 MHz

F2 - Processing parameters  
 SI 32768  
 SF 299.8700737 MHz  
 WDW EM  
 SSB 0  
 LB 0.30 Hz  
 GB 0  
 PC 1.00

1D NMR plot parameters  
 CX 20.00 cm  
 F1P 11.000 ppm  
 F1 3298.57 Hz  
 F2P -1.000 ppm  
 F2 -299.87 Hz  
 PPMCM 0.60000 ppm/cm  
 HZCM 179.92206 Hz/cm

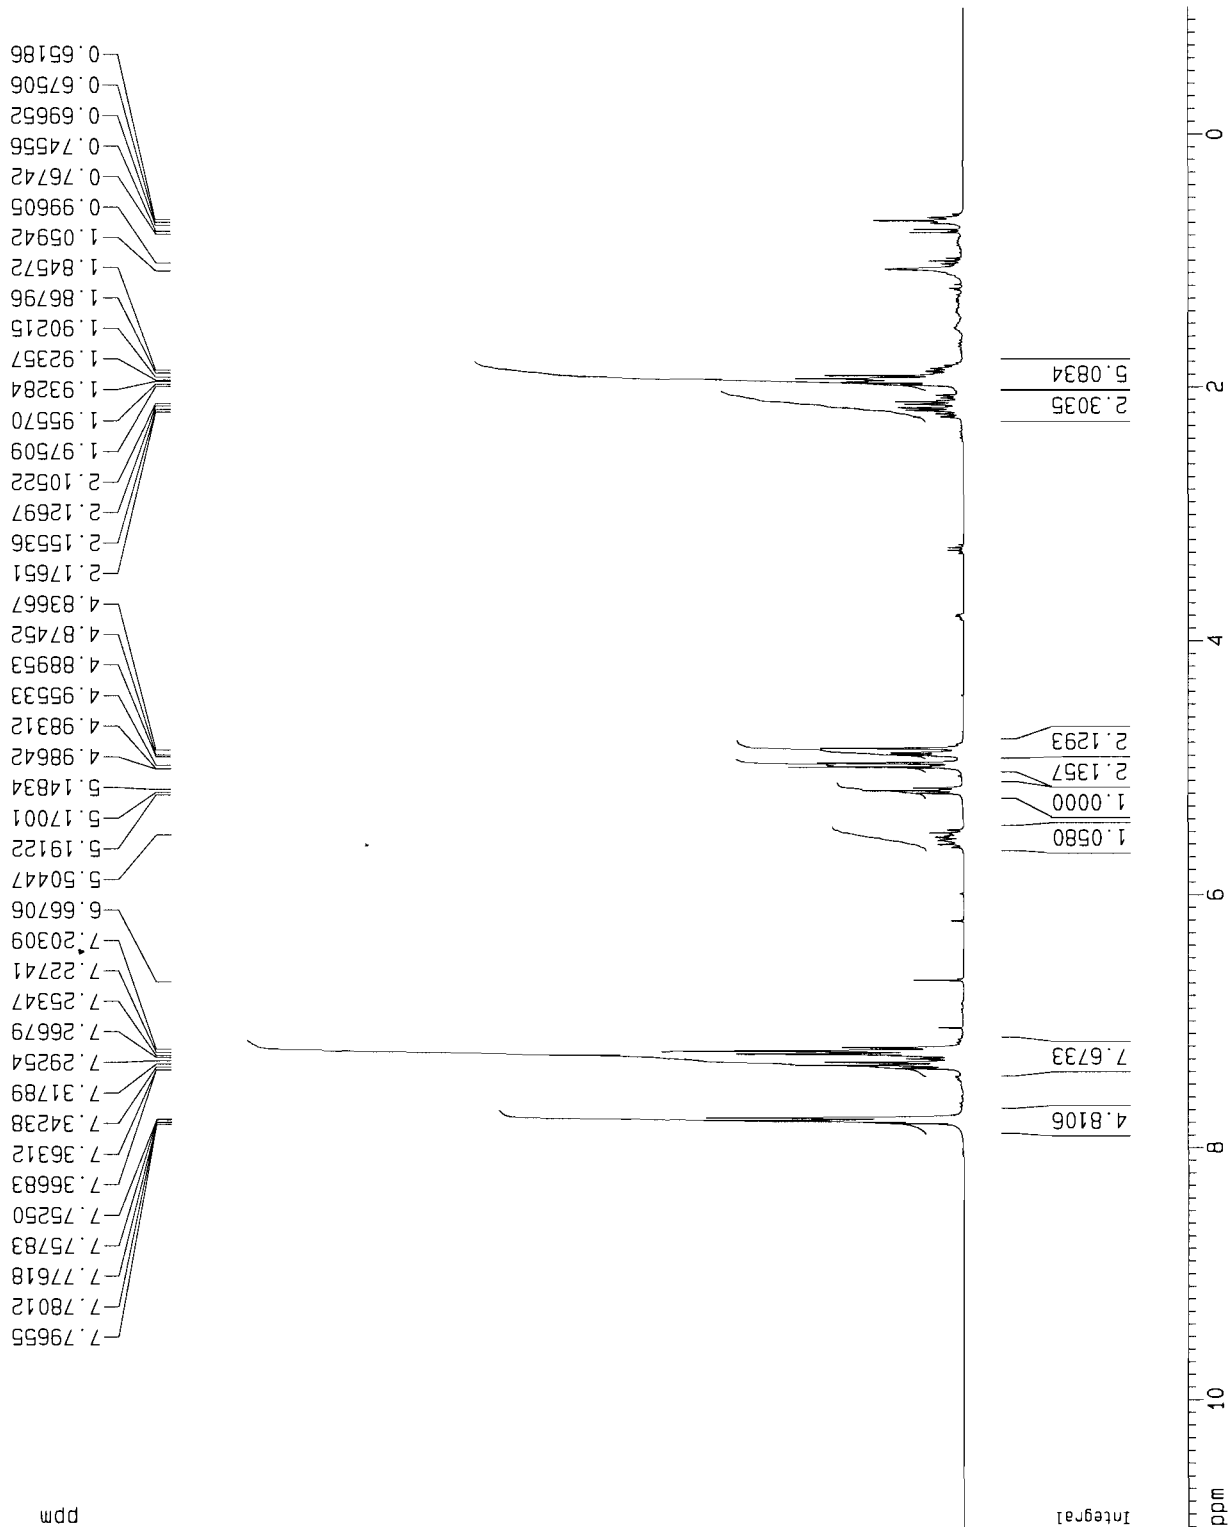

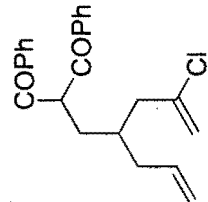

**15a**

Current Data Parameters  
 NAME Nov04-2007-Wein  
 EXPNO 11  
 PROCNO 1

F2 - Acquisition Parameters  
 Date\_ 20071104  
 Time 16.32  
 INSTRUM spect  
 PROBH0 5 mm QNP 1H/1  
 PULPROG zgpg30  
 TD 65536  
 SOLVENT CDCl3  
 NS 166  
 DS 4  
 SWH 18796.992 Hz  
 FIDRES 0.286819 Hz  
 AQ 1.7433076 sec  
 RG 512  
 DM 26.600 usec  
 DE 6.00 usec  
 TE 300.0 K  
 D1 2.00000000 sec  
 D11 0.03000000 sec  
 D12 0.00002000 sec

==== CHANNEL f1 =====  
 NUC1 13C  
 P1 5.40 usec  
 PL1 -6.00 dB  
 SF01 75.4106357 MHz

==== CHANNEL f2 =====  
 CPDPRG2 waltz16  
 NUC2 1H  
 PCPD02 115.00 usec  
 PL2 0.00 dB  
 PL12 20.00 dB  
 PL13 20.00 dB  
 SF02 299.8711995 MHz

F2 - Processing parameters  
 SI 32768  
 SF 75.4023410 MHz  
 WDW EM  
 SSB 0  
 LB 1.00 Hz  
 GB 0  
 PC 1.40

1D NMR plot parameters  
 CX 20.00 cm  
 F1P 2145.000 ppm  
 F1 16211.50 Hz  
 F2P -5.000 ppm  
 F2 -377.01 Hz  
 PPMCM 11.00000 ppm/cm  
 HZCM 829.42578 Hz/cm

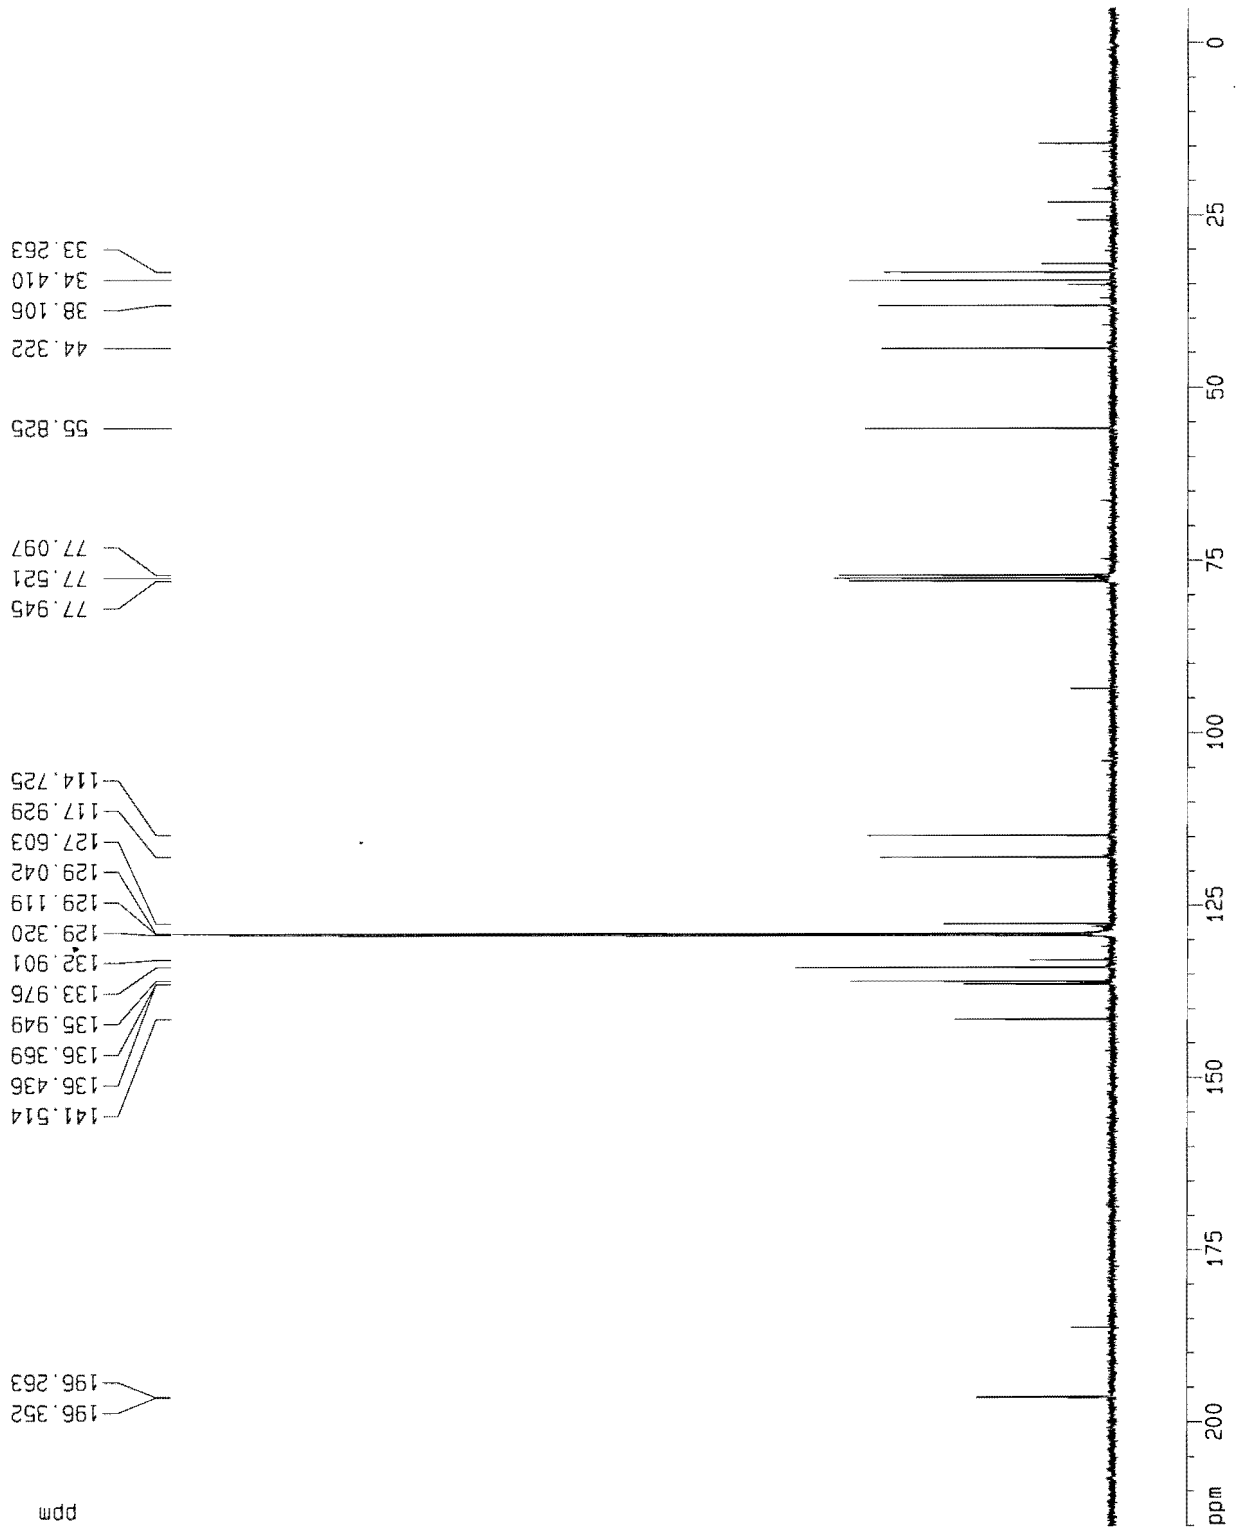

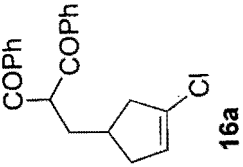

Current Data Parameters  
 NAME Nov21-2010-We.in  
 EXPNO 10  
 PROCNO 1

F2 - Acquisition Parameters  
 Date\_ 20101121  
 Time 13.27  
 INSTRUM spect  
 PROBHD 5 mm GNP 1H/1  
 PULPROG zg30  
 TD 65536  
 SOLVENT CDCl3  
 NS 16  
 DS 2  
 SWH 6172.839 Hz  
 FIDRES 0.094190 Hz  
 AQ 5.3084660 sec  
 RG 724.1  
 DM 81.000 usec  
 DE 6.00 usec  
 TE 300.0 K  
 D1 1.00000000 sec

==== CHANNEL f1 =====

NUC1 1H  
 P1 11.70 usec  
 PL1 0.00 dB  
 SF01 299.8718518 MHz

F2 - Processing parameters  
 SI 32768  
 SF 299.8700310 MHz  
 WDW EM  
 SSB 0  
 LB 0.30 Hz  
 GB 0  
 PC 1.00

1D NMR plot parameters  
 CX 20.00 cm  
 F1P 11.000 ppm  
 F1 3298.57 Hz  
 F2P -1.000 ppm  
 F2 -299.87 Hz  
 PPMCM 0.60000 ppm/cm  
 HZCM 179.92201 Hz/cm

1.18409  
1.49004  
1.97575  
2.06761  
2.07635  
2.17739  
2.18496  
2.20273  
2.20695  
2.22497  
2.22929  
2.28620  
2.45059  
2.46258  
2.47560  
2.51130  
2.55076  
2.55527  
5.12504  
5.14750  
5.16989  
5.51155  
5.51824  
5.52461  
7.19031  
7.36159  
7.36597  
7.38552  
7.38978  
7.41140  
7.41555  
7.47874  
7.48226  
7.50483  
7.52777  
7.87638  
7.88124  
7.88648  
7.89257  
7.90519  
7.90921

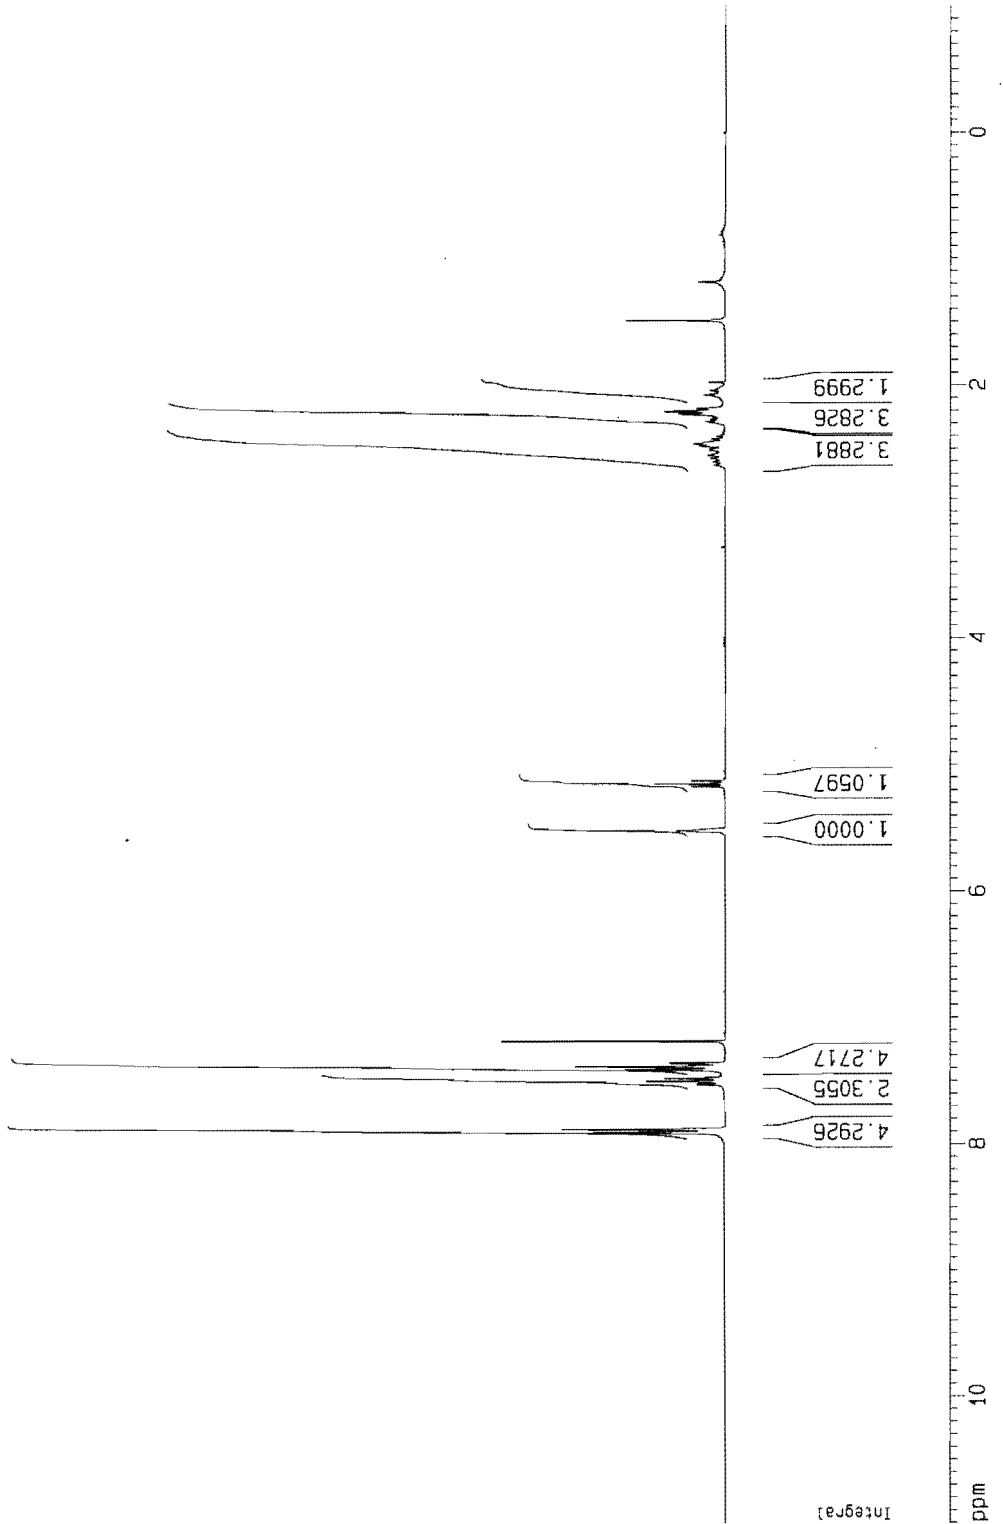

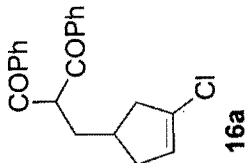

Current Data Parameters  
 NAME Nov21-2010-Wejn  
 EXPNO 12  
 PROCNO 1

F2 - Acquisition Parameters  
 Date\_ 20101121  
 Time 14.26  
 INSTRUM spect  
 PROBHD 5 mm QNP 1H/1  
 PULPROG zgpg30  
 TD 65536  
 SOLVENT CDCl3  
 NS 2615  
 DS 4  
 SWH 18796.992 Hz  
 FIDRES 0.286819 Hz  
 AQ 1.7433076 sec  
 RG 4096  
 DW 26.600 usec  
 DE 6.00 usec  
 TE 300.0 K  
 D1 2.00000000 sec  
 D11 0.03000000 sec  
 D12 0.00002000 sec

==== CHANNEL f1 =====  
 NUC1 13C  
 P1 5.40 usec  
 PL1 -5.00 dB  
 SFO1 75.4106357 MHz

==== CHANNEL f2 =====  
 CPDPRG2 waltz16  
 NUC2 1H  
 PCPD2 115.00 usec  
 PL2 0.00 dB  
 PL12 20.00 dB  
 PL13 20.00 dB  
 SFO2 299.8711995 MHz

F2 - Processing parameters  
 SI 32768  
 SF 75.4023410 MHz  
 WDW EM  
 SSB 0  
 LB 1.00 Hz  
 GB 0  
 PC 1.40

1D NMR plot parameters  
 CX 20.00 cm  
 F1P 245.000 ppm  
 F1 16211.50 Hz  
 F2P -5.000 ppm  
 F2 -377.01 Hz  
 PPMCM 11.00000 ppm/cm  
 HZCM 829.42578 Hz/cm

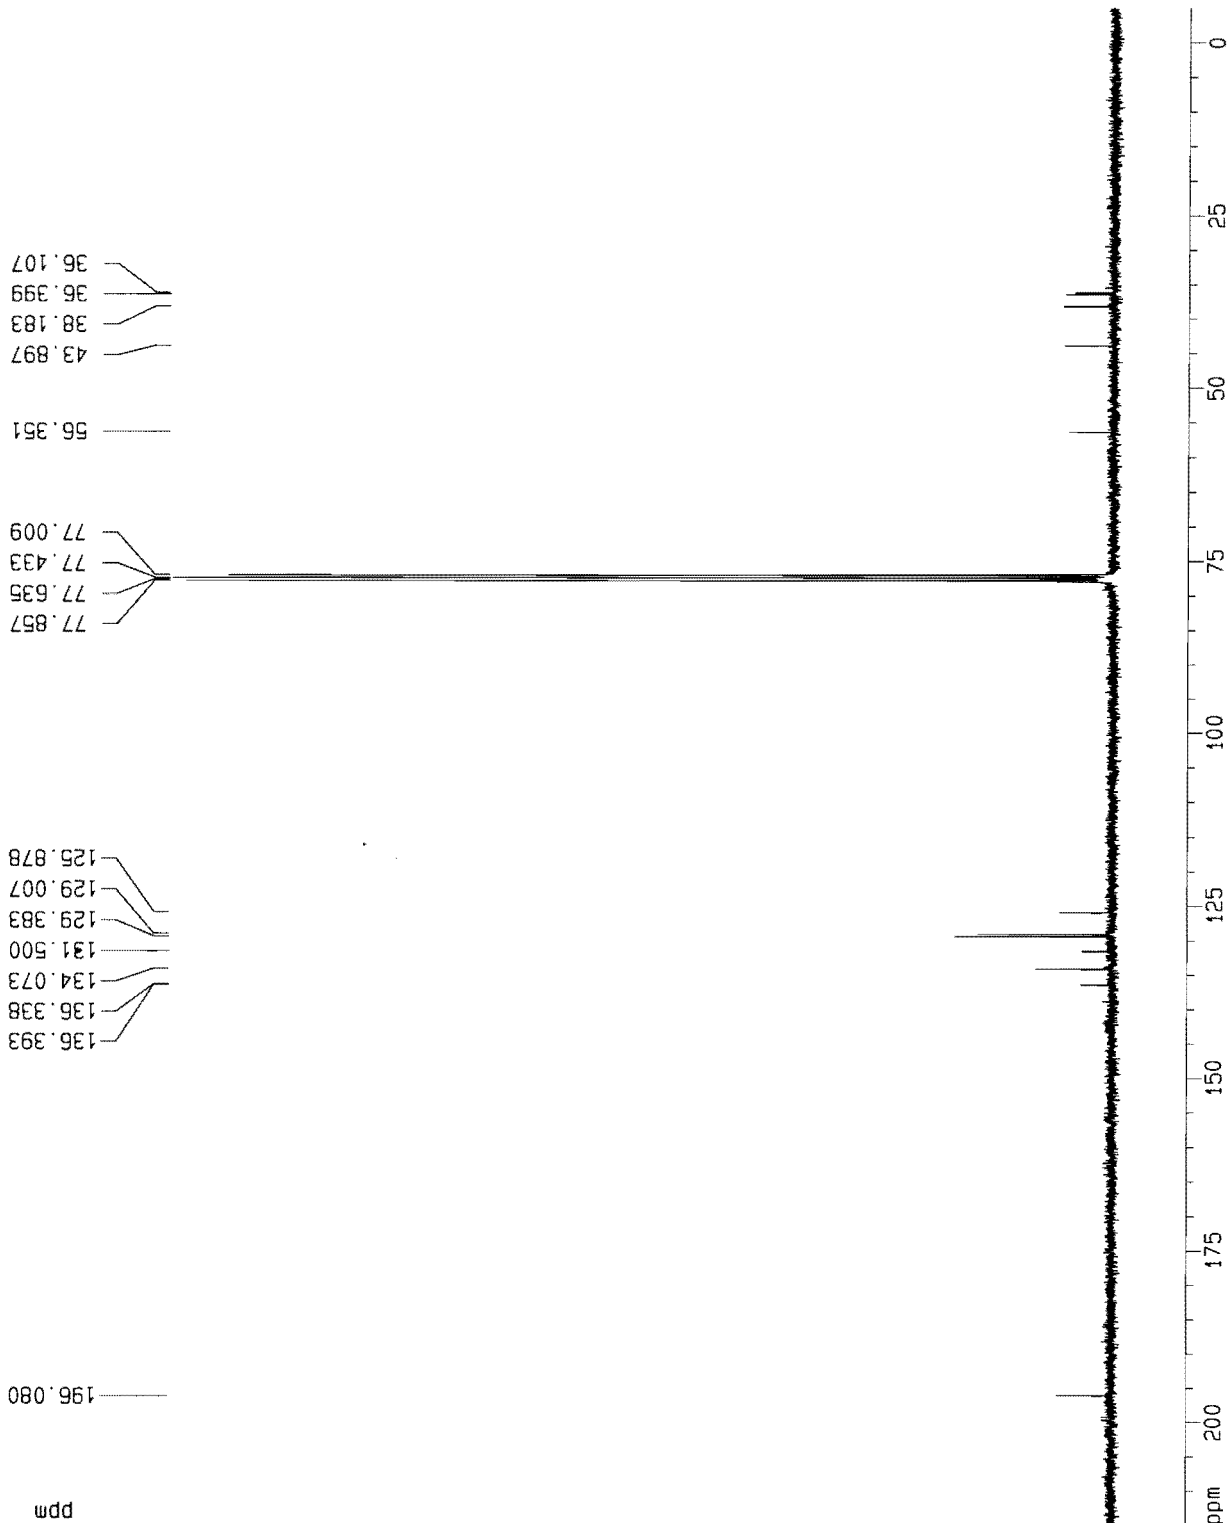

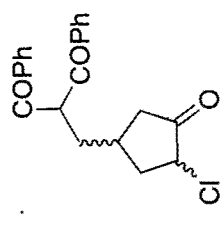

Current Data Parameters  
 NAME Nov11-2007-We.in  
 EXPNO 10  
 PROCNO 1

F2 - Acquisition Parameters  
 Date\_ 20071111  
 Time 23.48  
 INSTRUM spect  
 PROBHD 5 mm GNP 1H/1  
 PULPROG zg30  
 TD 65536  
 SOLVENT CDCl3  
 NS 16  
 DS 2  
 SWH 6172.639 Hz  
 FIDRES 0.094190 Hz  
 AQ 5.3084660 sec  
 RG 256  
 DM 81.000 usec  
 DE 6.00 usec  
 TE 300.0 K  
 D1 1.00000000 sec

===== CHANNEL f1 =====  
 NUC1 1H  
 P1 11.70 usec  
 PL1 0.00 dB  
 SF01 299.8718518 MHz

F2 - Processing parameters  
 SI 32768  
 SF 299.8700318 MHz  
 WDW EM  
 SSB 0  
 LB 0.30 Hz  
 GB 0  
 PC 1.00

1D NMR plot parameters  
 CX 20.00 cm  
 F1P 11.000 ppm  
 F1 3298.57 Hz  
 F2P -1.000 ppm  
 F2 -299.87 Hz  
 PPMCM 0.60000 ppm/cm  
 HZCM 179.92201 Hz/cm

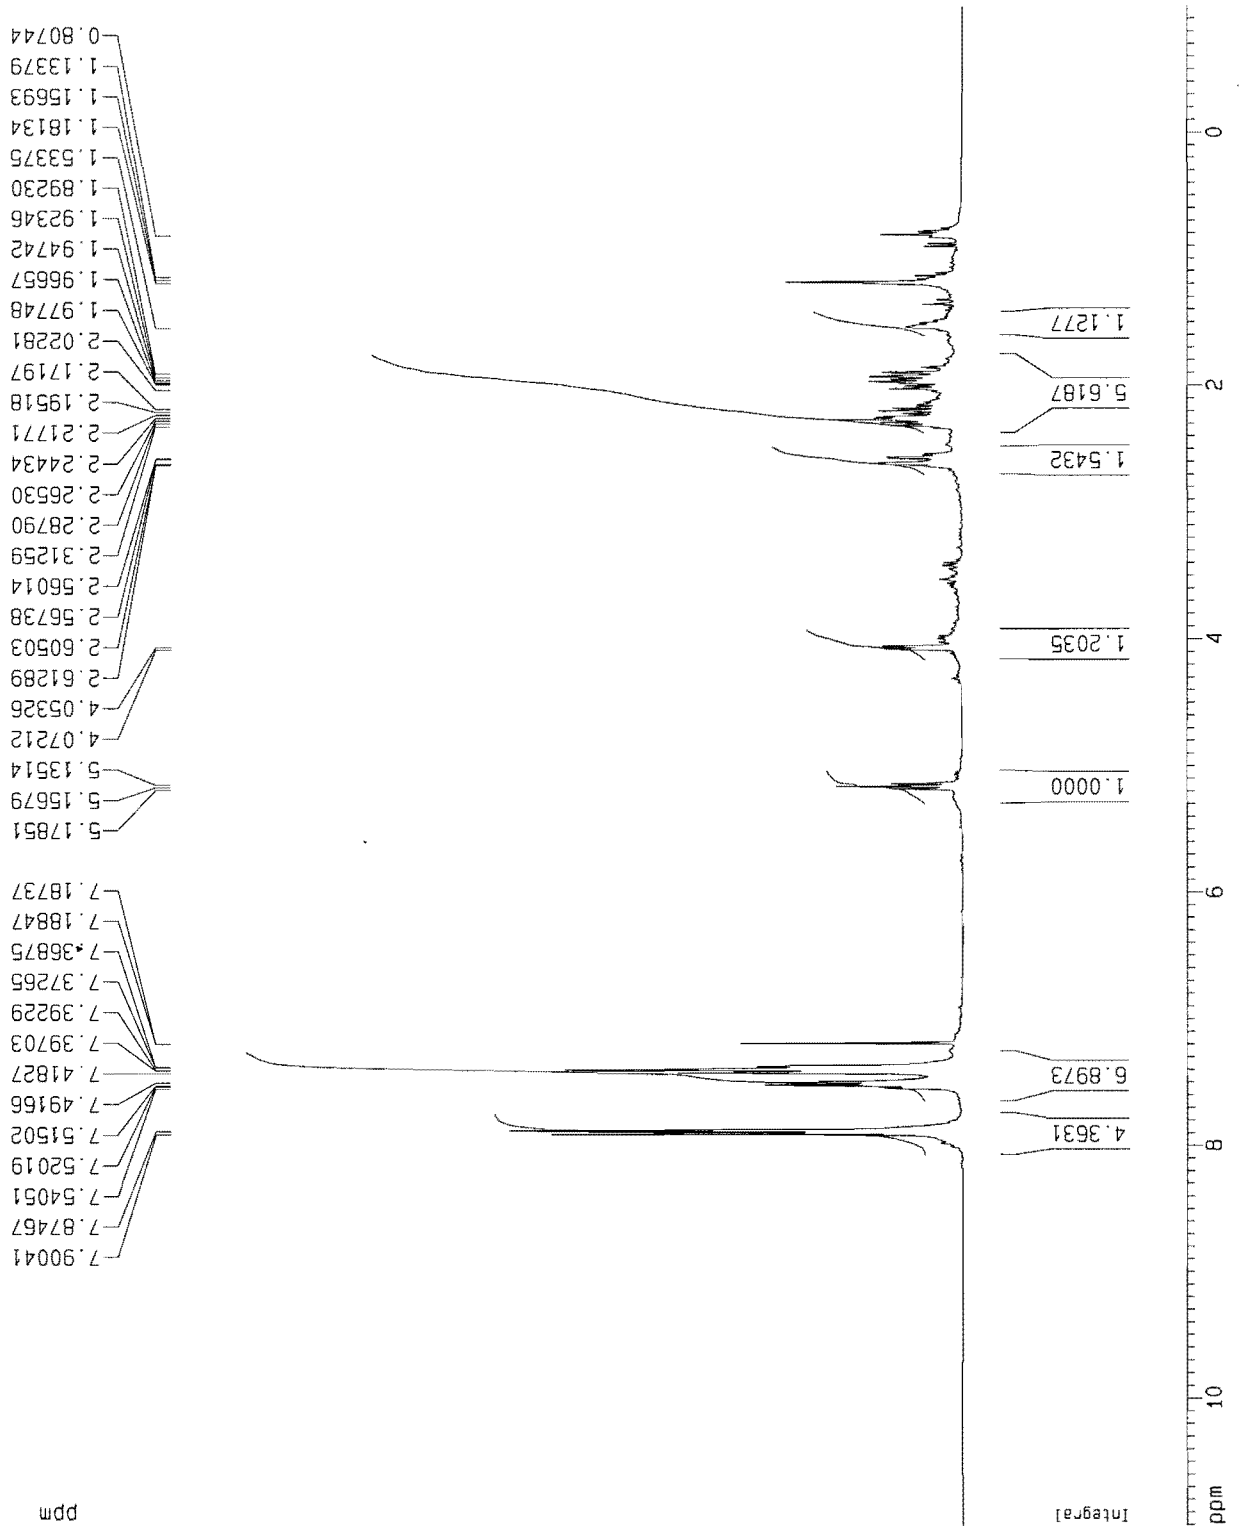

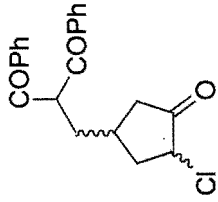

17a

Current Data Parameters  
 NAME Nov11-2007-Me1n  
 EXPNO 12  
 PROCNO 1

F2 - Acquisition Parameters  
 Date\_ 20071112  
 Time 9.36  
 INSTRUM spect  
 PROBHD 5 mm QNP 1H/1  
 PULPROG zgpg30  
 TO 65536  
 SOLVENT CDCl3  
 NS 9093  
 DS 4  
 SMH 18796.992 Hz  
 F1FRES 0.286819 Hz  
 AQ 1.7433076 sec  
 RG 512  
 DW 26.600 usec  
 DE 6.00 usec  
 TE 300.0 K  
 D1 2.00000000 sec  
 D11 0.03000000 sec  
 D12 0.00002000 sec

===== CHANNEL f1 =====  
 NUC1 13C  
 P1 5.40 usec  
 PL1 -6.00 dB  
 SF01 75.4106357 MHz

===== CHANNEL f2 =====  
 CPDPRG2 waltz16  
 NUC2 1H  
 PCPD2 115.00 usec  
 PL2 0.00 dB  
 PL12 20.00 dB  
 PL13 20.00 dB  
 SF02 299.8711995 MHz

F2 - Processing parameters  
 SI 32768  
 SF 75.4023410 MHz  
 MDW EM  
 SSB 0  
 LB 1.00 Hz  
 GB 0  
 PC 1.40

1D NMR plot parameters  
 CX 20.00 cm  
 F1P 215.000 ppm  
 F1 16211.50 Hz  
 F2P -5.000 ppm  
 F2 -377.01 Hz  
 PPMCM 11.00000 ppm/cm  
 HZCM 829.42578 Hz/cm

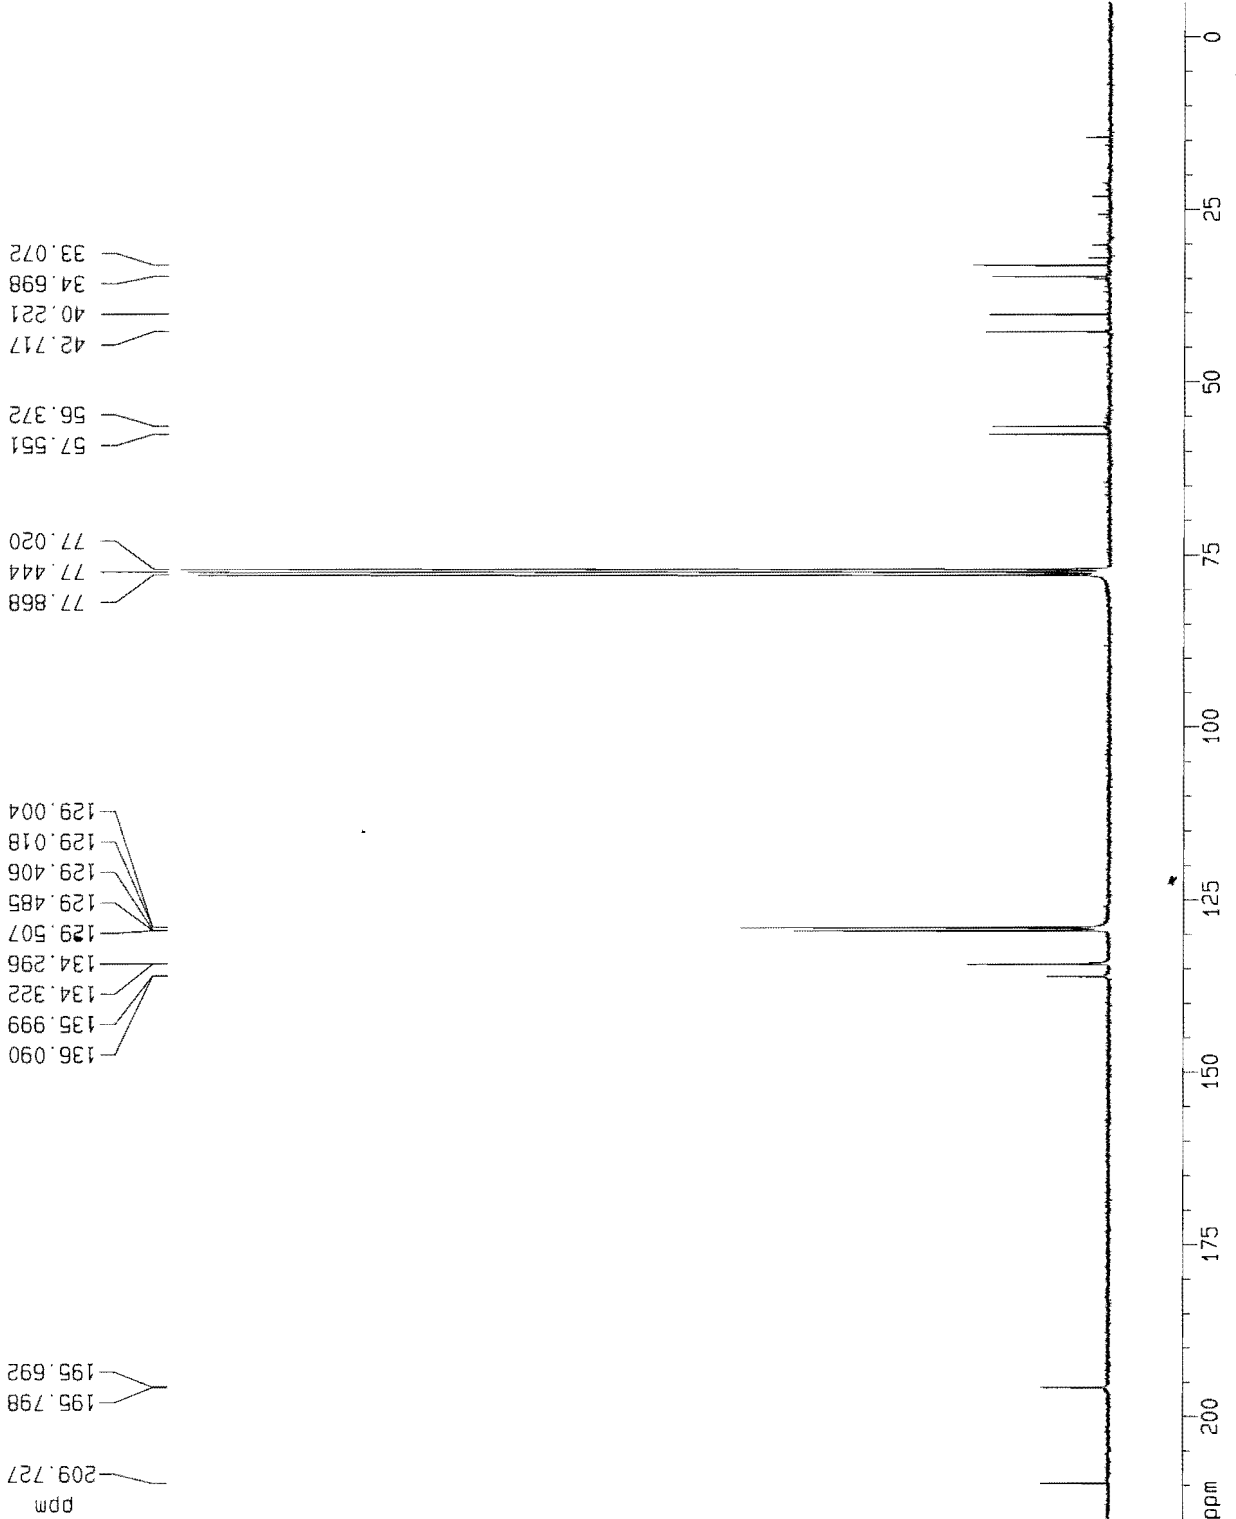

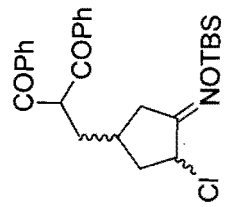

Current Data Parameters  
 NAME Nov13-2007-wein  
 EXPNO 30  
 PROCNO 1

F2 - Acquisition Parameters  
 Date\_ 20071113  
 Time 14.20  
 INSTRUM spect  
 PROBHD 5 mm GNP 1H/1  
 PULPROG zg30  
 TD 65536  
 SOLVENT CDCl3  
 NS 16  
 DS 2  
 SWH 6172.839 Hz  
 FIDRES 0.094190 Hz  
 AQ 5.3084660 sec  
 RG 256  
 DW 81.000 usec  
 DE 6.00 usec  
 TE 300.0 K  
 D1 1.00000000 sec

===== CHANNEL f1 =====  
 NUC1 1H  
 P1 11.70 usec  
 PL1 0.00 dB  
 SF01 299.8718518 MHz

F2 - Processing parameters  
 SI 32768  
 SF 299.8700550 MHz  
 WDW EM  
 SSB 0  
 LB 0.30 Hz  
 GB 0  
 PC 1.00

1D NMR plot parameters  
 CX 20.00 cm  
 F1P 11.000 ppm  
 F1 3298.57 Hz  
 F2P -1.000 ppm  
 F2 -299.87 Hz  
 PPMCM 0.60000 ppm/cm  
 HZCM 179.92203 Hz/cm

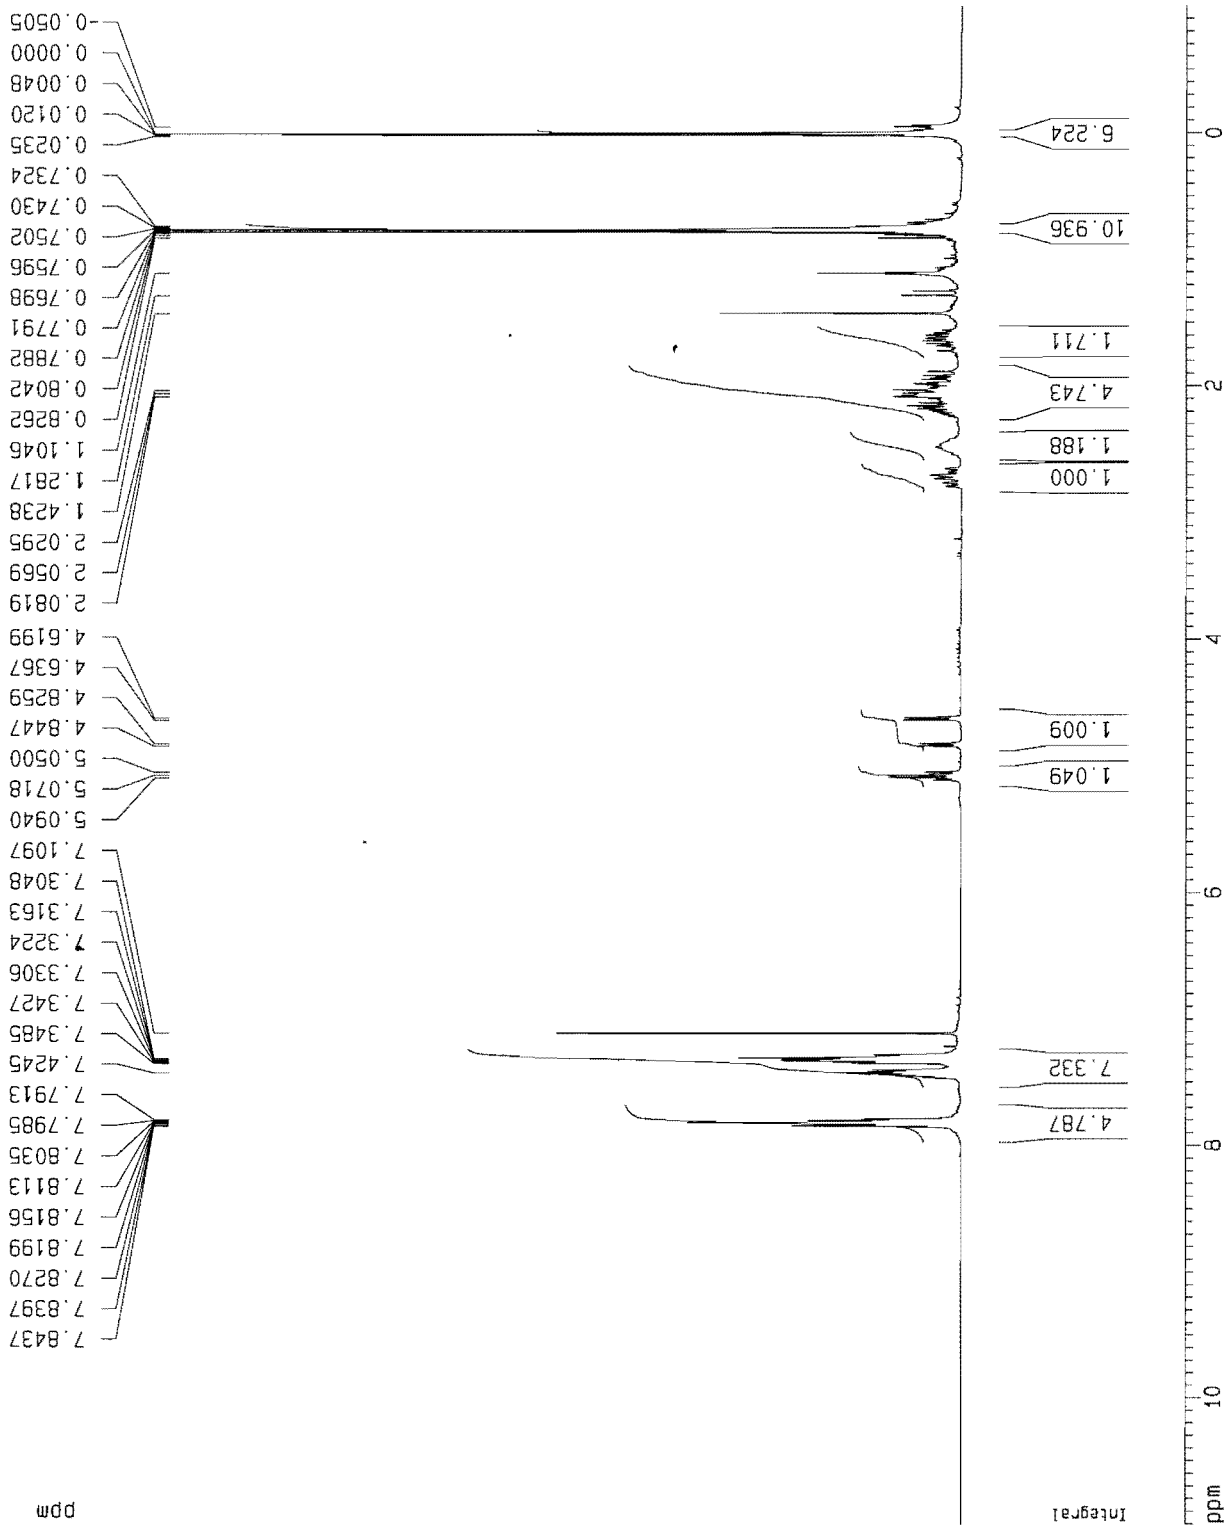



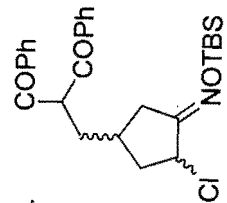

Current Data Parameters  
 NAME Nov13-2007-Warn  
 EXPNO 40  
 PROCNO 1

F2 - Acquisition Parameters  
 Date\_ 20071113  
 Time 22.30  
 INSTRUM spect  
 PROBHD 5 mm GNP 1H/1  
 PULPROG zgpg30  
 TD 65536  
 SOLVENT CDCl3  
 NS 5096  
 DS 4  
 SWH 18796.992 Hz  
 FIDRES 0.286819 Hz  
 AQ 1.7483076 sec  
 RG 2048  
 DW 26.600 usec  
 DE 6.00 usec  
 TE 300.0 K  
 O1 2.00000000 sec  
 D11 0.03000000 sec  
 D12 0.00002000 sec

===== CHANNEL f1 =====  
 NUC1 13C  
 P1 5.40 usec  
 PL1 -6.00 dB  
 SF01 75.4106357 MHz

===== CHANNEL f2 =====  
 CPDPRG2 waltz16  
 NUC2 1H  
 PCPD02 115.00 usec  
 PL2 0.00 dB  
 PL12 20.00 dB  
 PL13 20.00 dB  
 SF02 299.8711995 MHz

F2 - Processing parameters  
 SI 32768  
 SF 75.4023410 MHz  
 WDW EM  
 SSB 0  
 LB 1.00 Hz  
 GB 0  
 PC 1.40

10 NMR plot parameters  
 CX 20.00 cm  
 F1P 215.000 ppm  
 F1 16211.50 Hz  
 F2P -5.000 ppm  
 F2 -377.01 Hz  
 PPMCM 11.00000 ppm/cm  
 HZCM 829.42578 Hz/cm

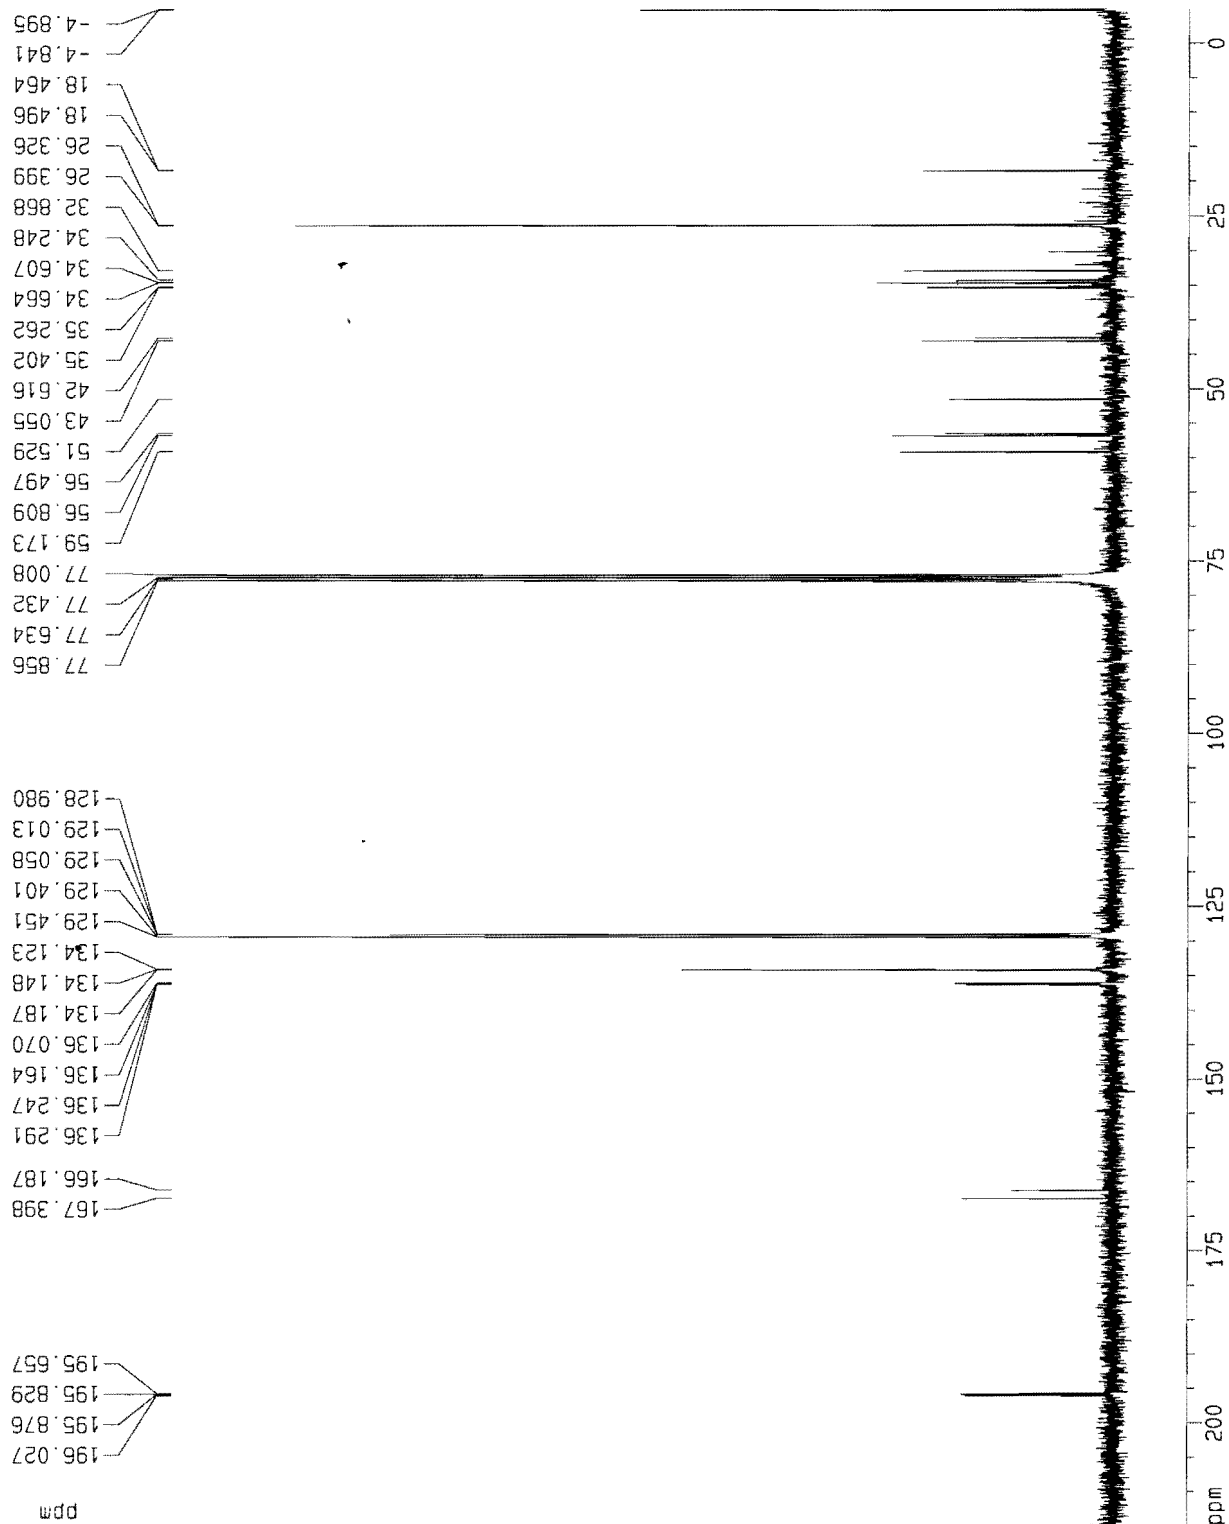

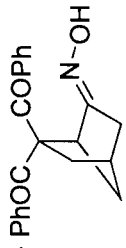

19

Current Data Parameters  
 NAME Nov14-2007-Mein  
 EXPNO 10  
 PROCNO 1

F2 - Acquisition Parameters  
 Date\_ 20071114  
 Time 18.25  
 INSTRUM spect  
 PROBHD 5 mm Multinu  
 PULPROG zg30  
 TD 65536  
 SOLVENT CDCl3  
 NS 218  
 DS 0  
 SWH 6172.839 Hz  
 FIDRES 0.094190 Hz  
 AQ 5.3084660 sec  
 RG 645.1  
 DW 81.000 usec  
 DE 6.00 usec  
 TE 300.0 K  
 D1 2.00000000 sec

==== CHANNEL f1 =====  
 NUC1 1H  
 P1 9.60 usec  
 PL1 -6.00 dB  
 SF01 300.1318534 MHz

F2 - Processing parameters  
 SI 32768  
 SF 300.1300356 MHz  
 WDW EM  
 SSB 0  
 LB 0.30 Hz  
 GB 0  
 PC 1.00

1D NMR plot parameters  
 CX 20.00 cm  
 F1P 11.000 ppm  
 F1 3301.43 Hz  
 F2P -1.000 ppm  
 F2 -300.13 Hz  
 PPMCM 0.60000 ppm/cm  
 HZCM 180.07802 Hz/cm

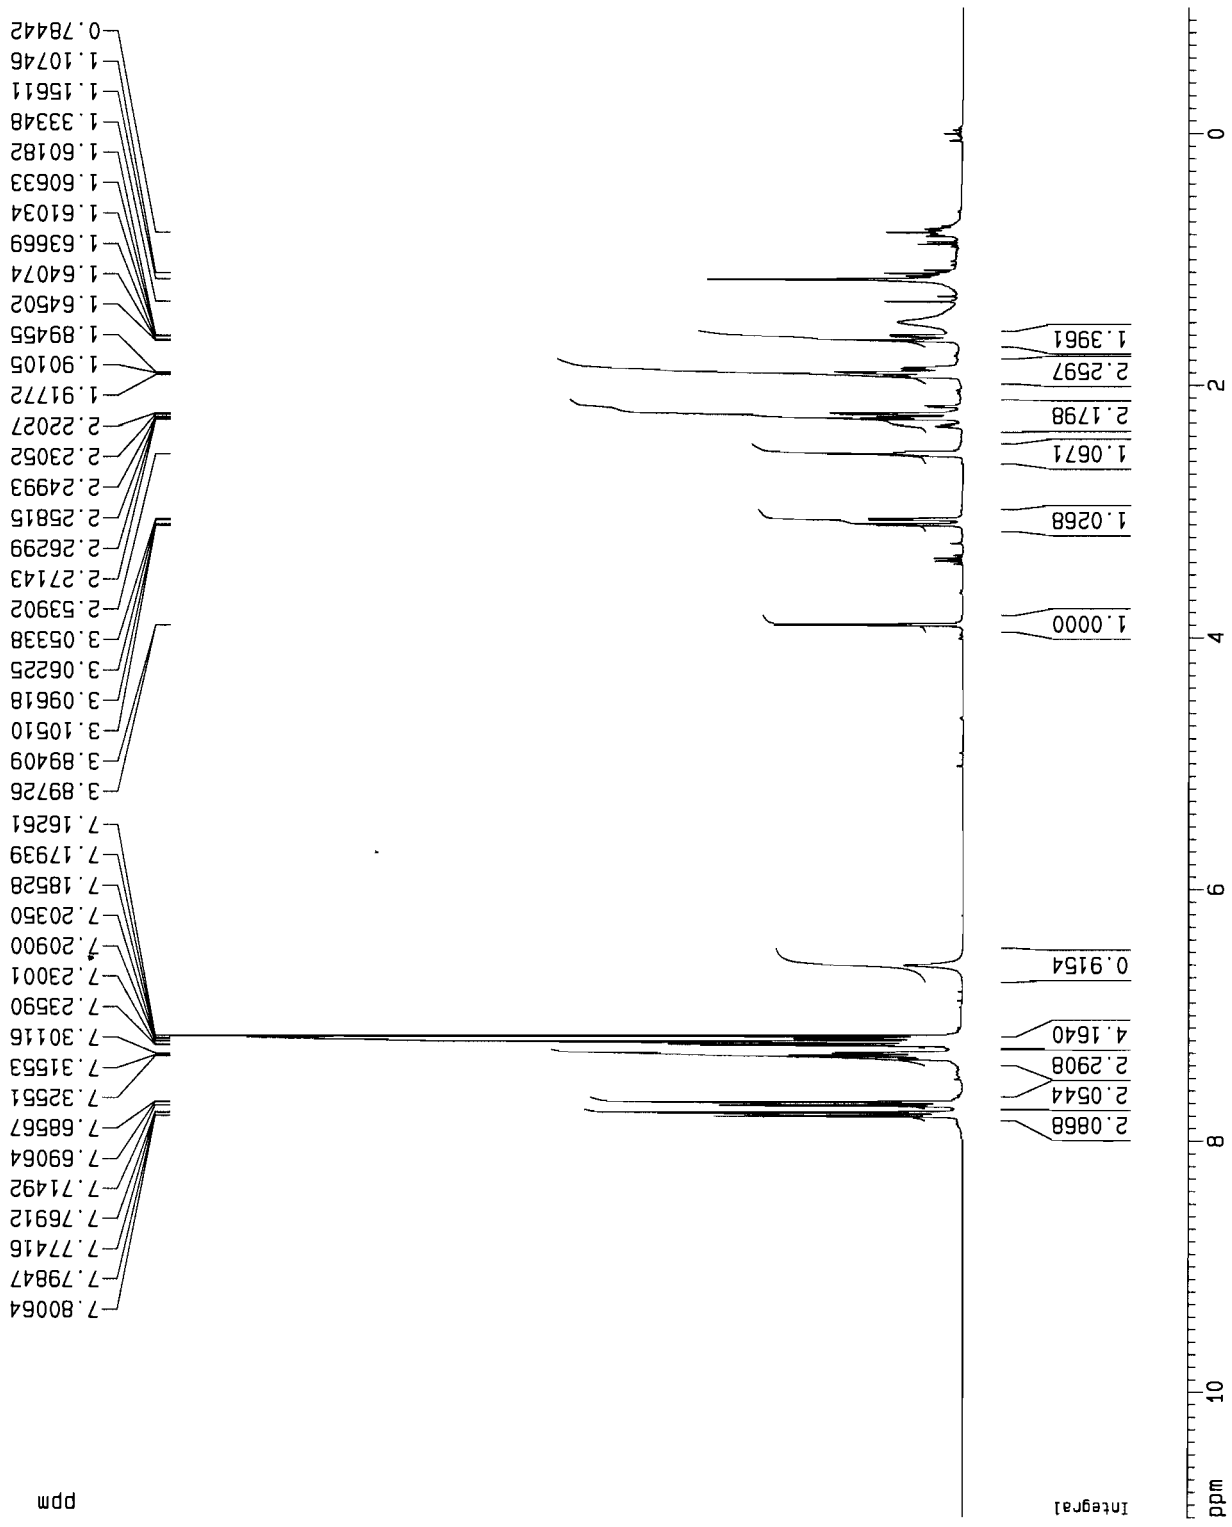

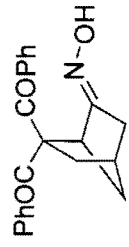

19

Current Data Parameters  
 NAME Nov14-2007-Wein  
 EXPNO 12  
 PROCNO 1

F2 - Acquisition Parameters  
 Date\_ 20071114  
 Time 20.16  
 INSTRUM spect  
 PROBHD 5 mm Multinu  
 PULPROG zgpg30  
 TD 65536  
 SOLVENT COC13  
 NS 2339  
 DS 4  
 SWH 18832.393 Hz  
 FIDRES 0.287360 Hz  
 AQ 1.7400308 sec  
 RG 16384  
 DM 26.550 usec  
 DE 6.00 usec  
 TE 300.0 K  
 D1 2.00000000 sec  
 d11 0.03000000 sec  
 d12 0.00002000 sec

===== CHANNEL f1 =====  
 NUC1 13C  
 P1 11.80 usec  
 PL1 0.00 dB  
 SF01 75.4760200 MHz

===== CHANNEL f2 =====  
 CPDPRG2 waitz16  
 NUC2 1H  
 PCPD2 110.00 usec  
 PL2 0.00 dB  
 PL12 17.50 dB  
 PL13 17.50 dB  
 SF02 300.1312005 MHz

F2 - Processing parameters  
 SI 32768  
 SF 75.4677190 MHz  
 MDW EM  
 SSB 0  
 LB 1.00 Hz  
 GB 0  
 PC 1.40

1D NMR plot parameters  
 CX 20.00 cm  
 F1P 245.000 ppm  
 F1 16225.56 Hz  
 F2P -5.000 ppm  
 F2 -377.34 Hz  
 PPMCM 11.00000 ppm/cm  
 HZCM 830.14490 Hz/cm

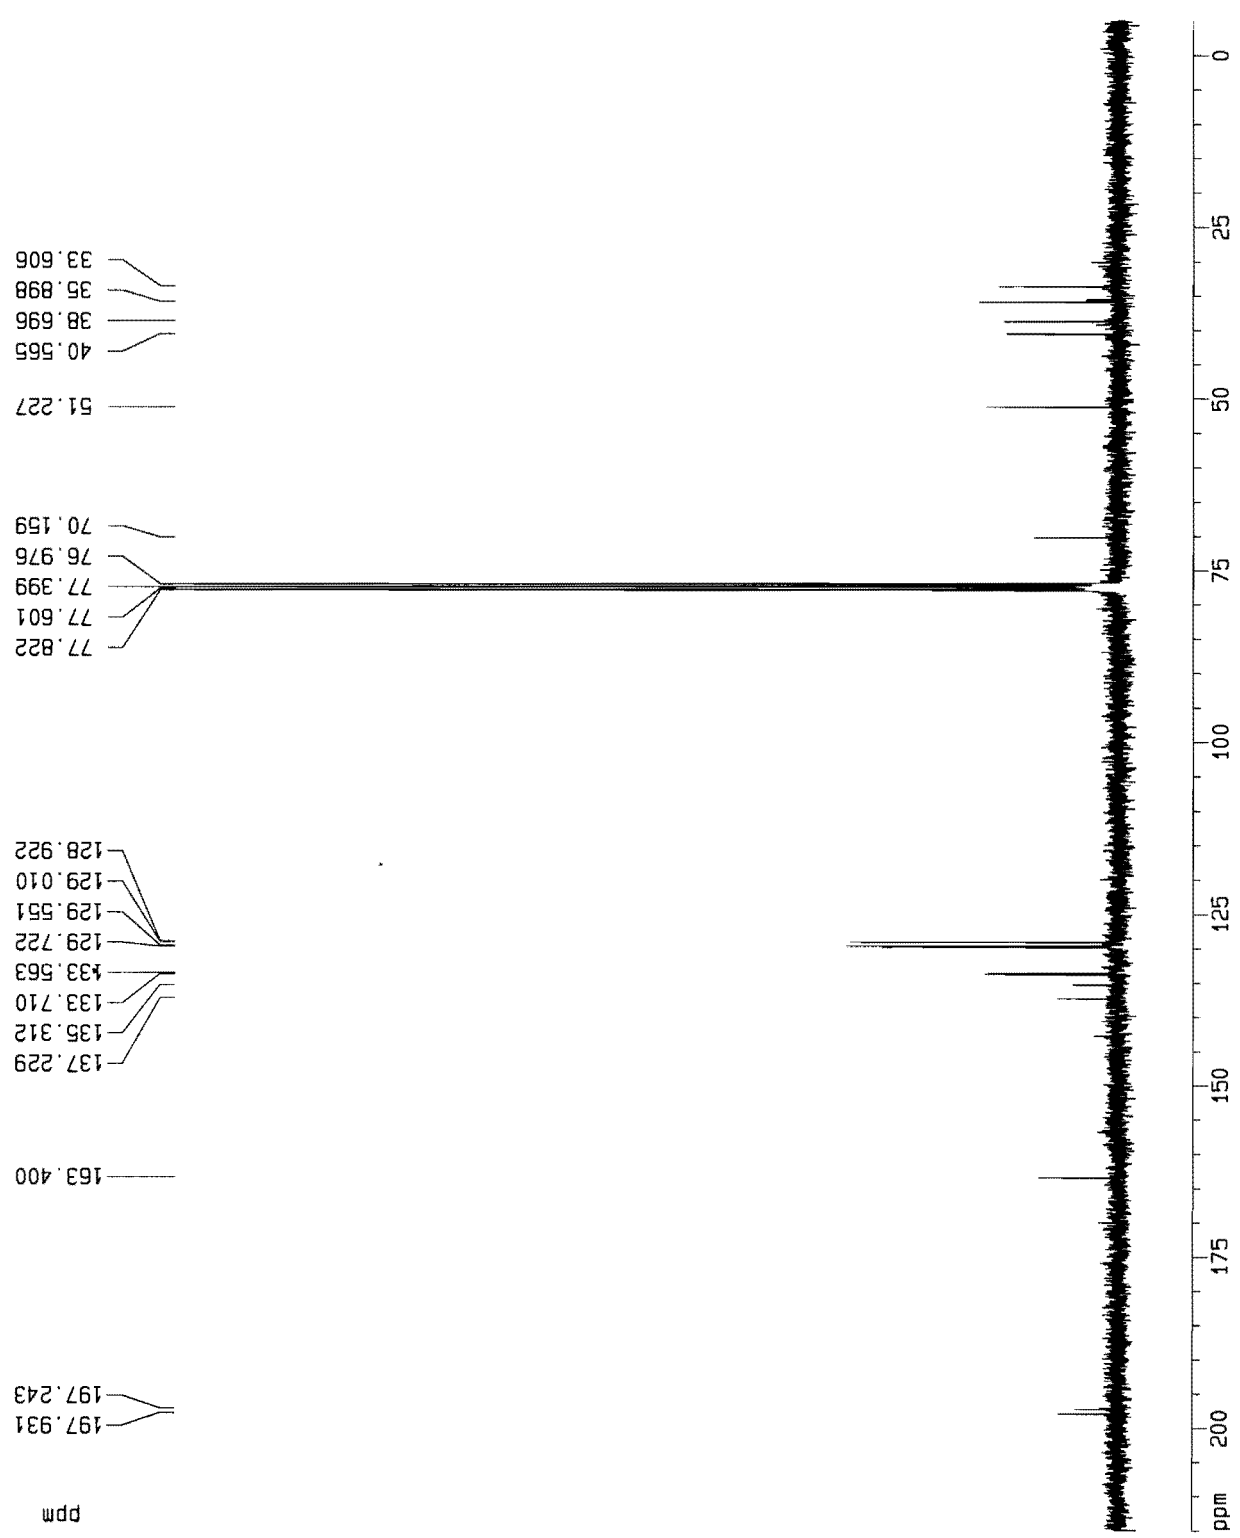

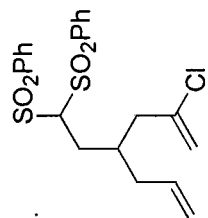

15b

Current Data Parameters  
 NAME Jul08-2010-Wein  
 EXPNO 20  
 PROCNO 1

F2 - Acquisition Parameters  
 Date\_ 20100708  
 Time 17.11  
 INSTRUM spect  
 PROBHD 5 mm QNP 1H/1  
 PULPROG zg30  
 TD 65536  
 SOLVENT CDC13  
 NS 16  
 DS 2  
 SWH 6172.839 Hz  
 FIDRES 0.094190 Hz  
 AQ 5.3084660 sec  
 RG 64  
 DW 81.000 usec  
 DE 6.00 usec  
 TE 300.0 K  
 D1 1.00000000 sec

==== CHANNEL f1 =====  
 NUC1 1H  
 P1 11.70 usec  
 PL1 0.00 dB  
 SF01 299.8718518 MHz

F2 - Processing parameters  
 SI 32768  
 SF 299.8700302 MHz  
 WDW EM  
 SSB 0  
 LB 0.30 Hz  
 GB 0  
 PC 1.00  
 ID NMR plot parameters  
 CX 20.00 cm  
 F1P 11.000 ppm  
 F1 3298.57 Hz  
 F2P -1.000 ppm  
 F2 -299.87 Hz  
 PPMCM 0.60000 ppm/cm  
 HZCM 179.92201 Hz/cm

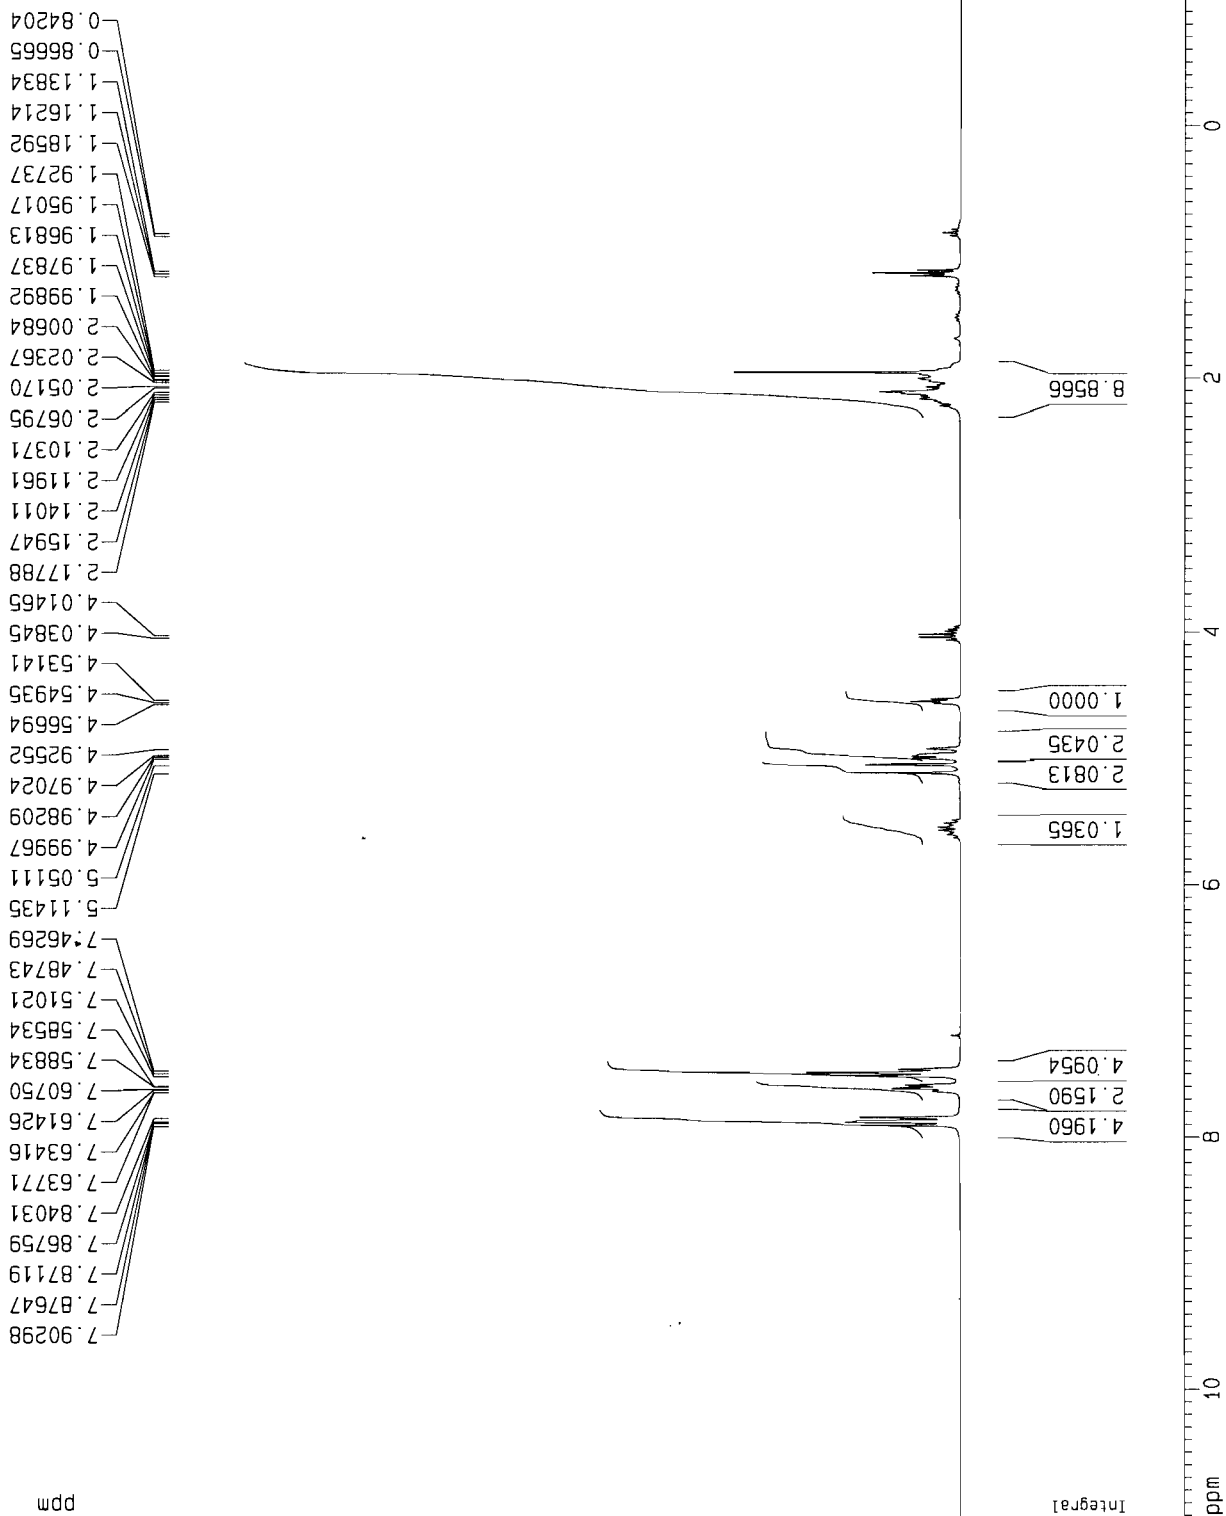

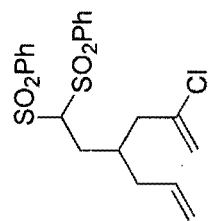

15b

Current Data Parameters  
 NAME Ju108-2010-Wein  
 EXPNO 21  
 PROCNO 1

F2 - Acquisition Parameters  
 Date\_ 20100708  
 Time 17.20  
 INSTRUM spect  
 PROBHD 5 mm QNP 1H/1  
 PULPROG zgpg30  
 TD 65536  
 SOLVENT CDCl3  
 NS 135  
 DS 4  
 SWH 18796.992 HZ  
 FIDRES 0.286819 HZ  
 AQ 1.7433076 sec  
 RG 4096  
 CW 26.600 usec  
 DE 6.00 usec  
 TE 300.0 K  
 D1 2.00000000 sec  
 D11 0.03000000 sec  
 D12 0.00002000 sec

===== CHANNEL f1 =====  
 NUC1 13C  
 P1 5.40 usec  
 PL1 -6.00 dB  
 SF01 75.4106357 MHz

===== CHANNEL f2 =====  
 CPDPRG2 waltz16  
 NUC2 1H  
 PCPD2 115.00 usec  
 PL2 0.00 dB  
 PL12 20.00 dB  
 PL13 20.00 dB  
 SF02 299.8711995 MHz

F2 - Processing parameters  
 SI 32768  
 SF 75.4023410 MHz  
 WDW EM  
 SSB 0  
 LB 1.00 HZ  
 GB 0  
 PC 1.40

1D NMR plot parameters  
 CX 20.00 cm  
 F1P 215.000 ppm  
 F1 16211.50 HZ  
 F2P -5.000 ppm  
 F2 -377.01 HZ  
 PPMCM 11.00000 ppm/cm  
 HZCM 829.42578 Hz/cm

43.900  
 37.535  
 33.531  
 29.669

81.784  
 77.986  
 77.562  
 77.137

140.613  
 138.369  
 137.693  
 135.156  
 135.047  
 130.275  
 129.936  
 129.597  
 129.555  
 118.634  
 115.363

ppm

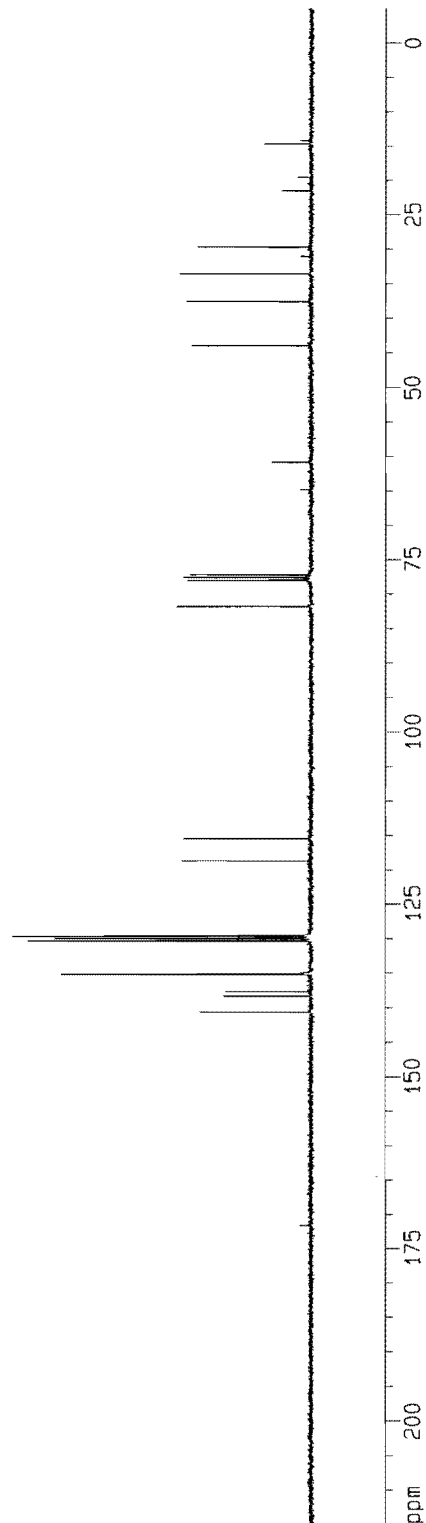

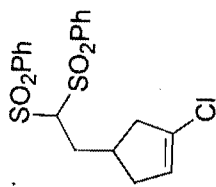

16b

Current Data Parameters

NAME Jul12-2010-Main  
 EXPNO 21  
 PROCNO 1

F2 - Acquisition Parameters

Date\_ 20100712  
 Time 17.24  
 INSTRUM spect  
 PROBHD 5 mm Multinu  
 PULPROG zg30  
 TD 65536  
 SOLVENT CDCl3  
 NS 16  
 DS 2  
 SWH 6172.839 Hz  
 FIDRES 0.094190 Hz  
 AQ 5.3084660 sec  
 RG 322.5  
 DW 81.000 usec  
 DE 6.00 usec  
 TE 300.0 K  
 D1 1.0000000 sec

===== CHANNEL f1 =====

NUC1 1H  
 P1 9.60 usec  
 PL1 -6.00 dB  
 SF01 300.1318534 MHz

F2 - Processing parameters

SI 32768  
 SF 300.1300275 MHz  
 NDM EM  
 SSB 0  
 LB 0.30 Hz  
 GB 0  
 PC 1.00

1D NMR plot parameters  
 CX 20.00 cm  
 F1P 11.000 ppm  
 F1 3301.43 Hz  
 F2P -1.000 ppm  
 F2 -300.13 Hz  
 PPMCM 0.60000 ppm/cm  
 HZCM 180.07802 Hz/cm

7.90633  
 7.89459  
 7.89063  
 7.88903  
 7.86762  
 7.86224  
 7.85691  
 7.84719  
 7.84291  
 7.84585  
 7.64000  
 7.63301  
 7.62054  
 7.54520  
 7.51874  
 7.49403  
 7.18916  
 5.46421  
 5.45704  
 5.45002  
 5.00812  
 4.26995  
 4.25109  
 4.23228  
 2.20702  
 2.18819  
 2.18208  
 2.16305  
 2.01866  
 2.00809  
 1.99999  
 1.96950  
 1.95594  
 1.88315  
 1.87443  
 1.83049  
 1.56411  
 1.55940  
 1.54322  
 1.53762  
 1.52714  
 1.18343  
 0.86016

ppm

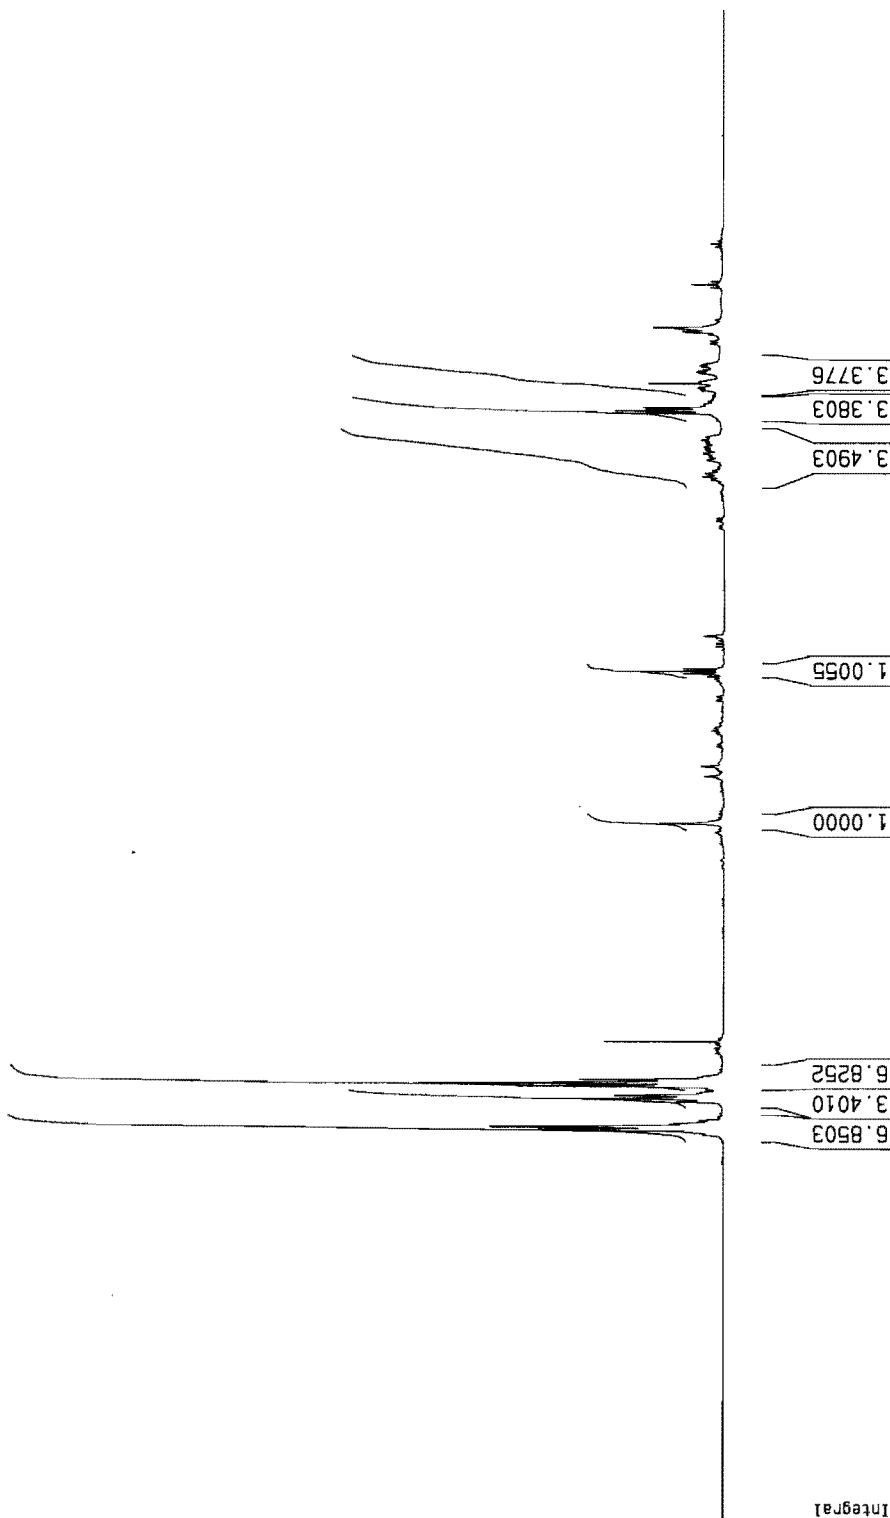

ppm

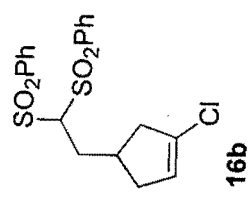

Current Data Parameters  
 NAME Jul12-2010-wein  
 EXPNO 31  
 PROCNO 1

F2 - Acquisition Parameters  
 Date\_ 20100712  
 Time 19.06  
 INSTRUM spect  
 PROBHD 5 mm QNP 1H/1  
 PULPROG zgpg30  
 TO 65536  
 SOLVENT CDC13  
 NS 553  
 DS 4  
 SWH 18796.992 Hz  
 FIDRES 0.286619 Hz  
 AQ 1.7433076 sec  
 RG 2048  
 DM 26.600 usec  
 DE 5.00 usec  
 TE 300.0 K  
 D1 2.00000000 sec  
 D11 0.03000000 sec  
 D12 0.00000000 sec

===== CHANNEL f1 =====  
 NUC1 13C  
 P1 5.40 usec  
 PL1 -6.00 dB  
 SF01 75.4106357 MHz

===== CHANNEL f2 =====  
 CPDPRG2 waltz16  
 NUC2 1H  
 PCPD2 115.00 usec  
 PL2 0.00 dB  
 PL12 20.00 dB  
 PL13 20.00 dB  
 SF02 299.6711995 MHz

F2 - Processing parameters  
 SI 32768  
 SF 75.4023410 MHz  
 WDW EM  
 SSB 0  
 LB 1.00 Hz  
 GB 0  
 PC 1.40

1D NMR plot parameters  
 CX 20.00 cm  
 F1P 215.000 ppm  
 F1 16211.50 Hz  
 F2P -5.000 ppm  
 F2 -377.01 Hz  
 PPMCM 11.00000 ppm/cm  
 HZCM 829.42578 Hz/cm

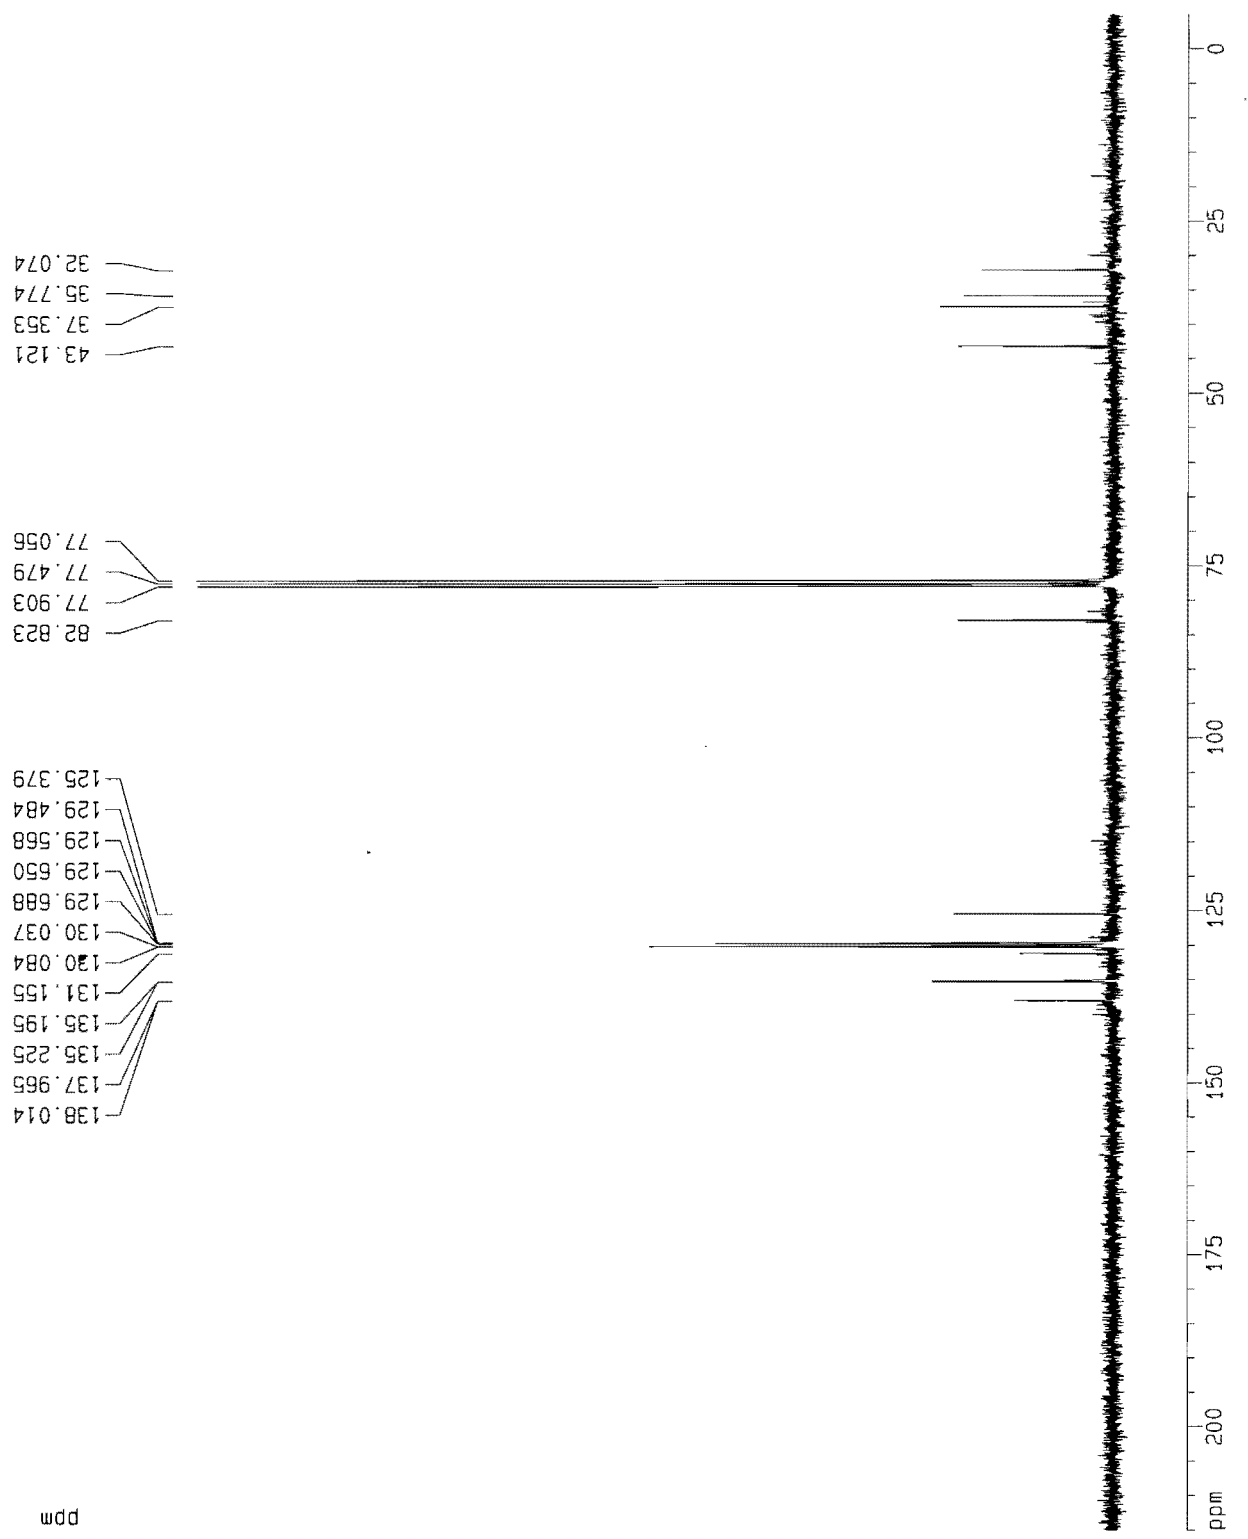

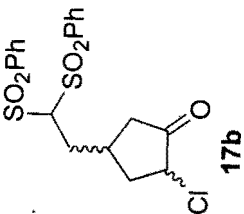

Current Data Parameters  
 NAME Jul13-2010-Wein  
 EXPNO 50  
 PROCNO 1

F2 - Acquisition Parameters  
 Date\_ 20100713  
 Time 19.18  
 INSTRUM spect  
 PROBH0 5 mm QNP 1H/1  
 PULPROG zg30  
 TD 65536  
 SOLVENT CDCl3  
 NS 16  
 DS 2  
 SWH 6172.839 Hz  
 FIDRES 0.094190 Hz  
 AQ 5.3084660 sec  
 RG 406.4  
 OW 61.000 usec  
 DE 6.00 usec  
 TE 300.0 K  
 D1 1.00000000 sec

===== CHANNEL f1 =====  
 NUC1 1H  
 P1 11.70 usec  
 PL1 0.00 dB  
 SF01 299.8718518 MHz

F2 - Processing parameters  
 SI 32768  
 SF 299.8700298 MHz  
 WDW EM  
 SSB 0  
 LB 0.30 Hz  
 GB 0  
 PC 1.00

1D NMR plot parameters  
 CX 20.00 cm  
 F1P 11.000 ppm  
 F1 3298.57 Hz  
 F2P -1.000 ppm  
 F2 -299.87 Hz  
 PPMCM 0.60000 ppm/cm  
 HZCM 179.92201 Hz/cm

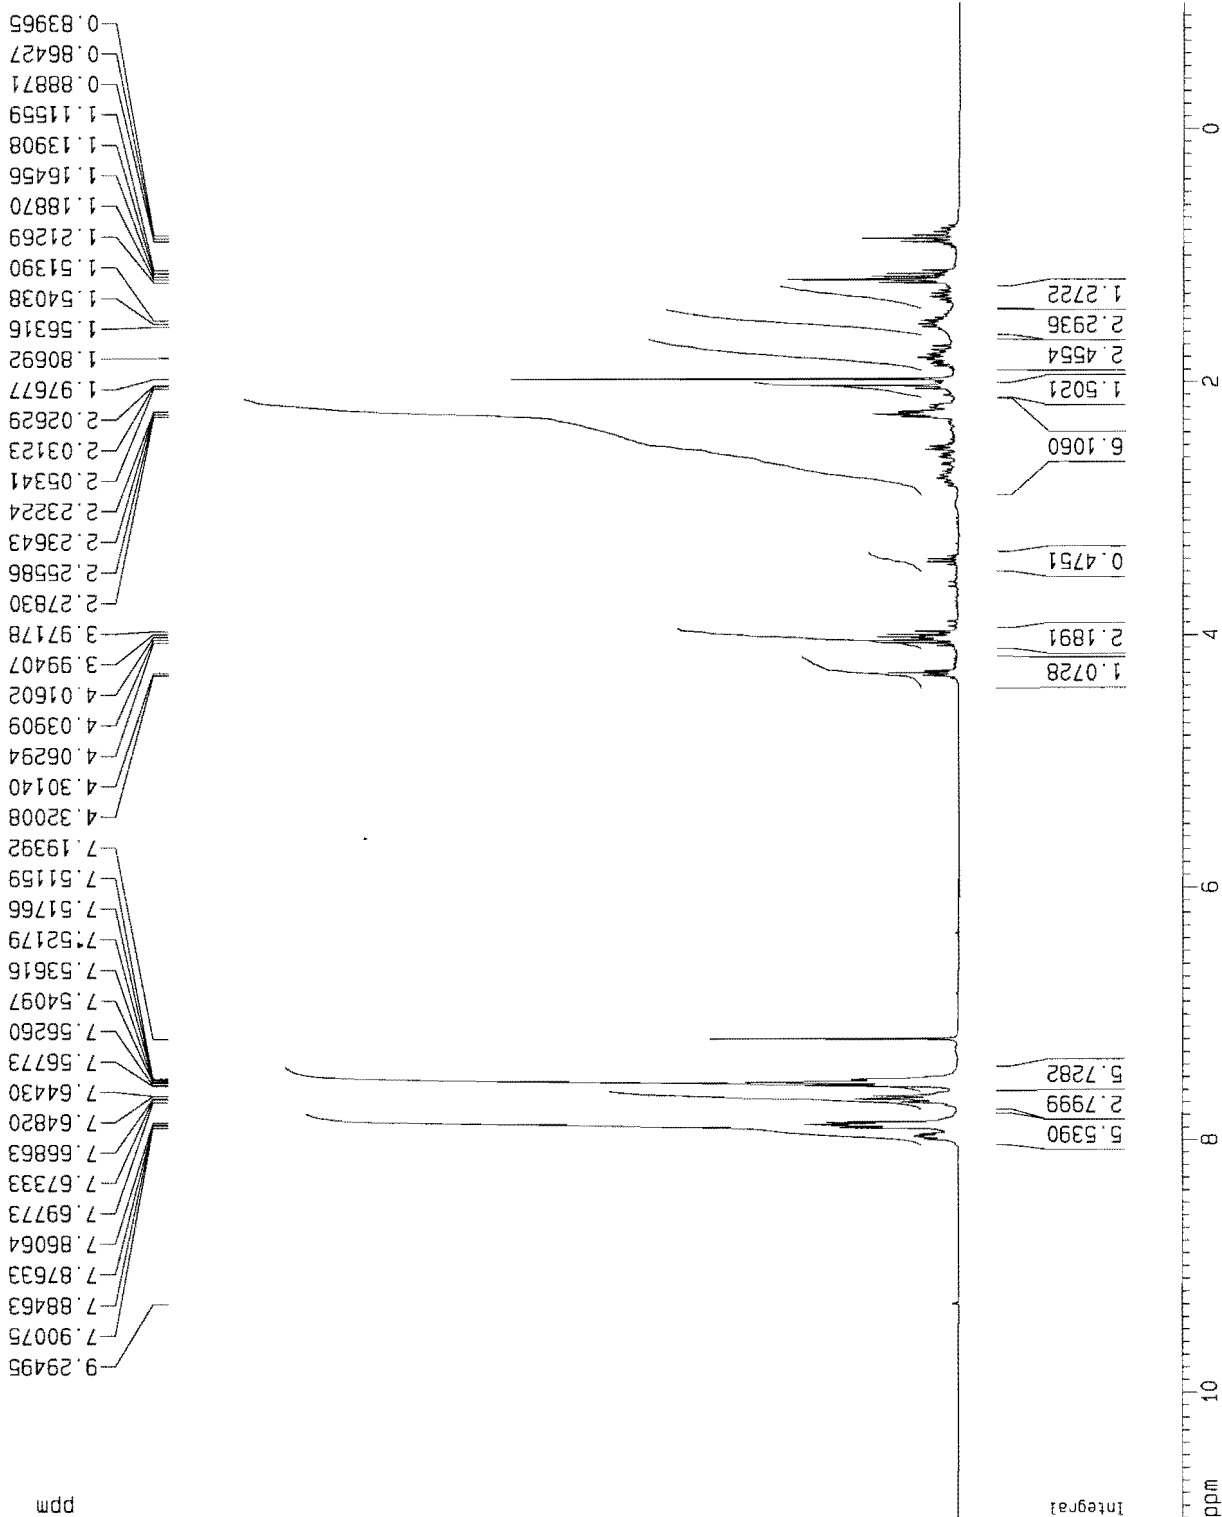



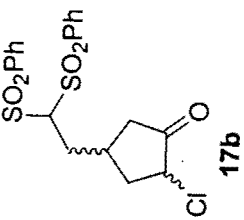

Current Data Parameters  
 NAME Jul13-2010-Me.in  
 EXPNO 52  
 PROCNO 1

F2 - Acquisition Parameters  
 Date\_ 20100713  
 Time 20.38  
 INSTRUM spect  
 PROBHD 5 mm QNP 1H/1  
 PULPROG zgpg30  
 TO 65536  
 SOLVENT CDCl3  
 NS 12157  
 DS 4  
 SWH 18796.992 Hz  
 FIDRES 0.286619 Hz  
 AQ 1.743076 sec  
 RG 2048  
 DM 26.600 usec  
 DE 6.00 usec  
 TE 300.0 K  
 D1 2.00000000 sec  
 D11 0.03000000 sec  
 D12 0.00002000 sec

==== CHANNEL f1 =====  
 NUC1 13C  
 P1 5.40 usec  
 PL1 -6.00 dB  
 SFO1 75.4106357 MHz

==== CHANNEL f2 =====  
 CPDPRG2 waltz15  
 NUC2 1H  
 PCPD2 115.00 usec  
 PL2 0.00 dB  
 PL12 20.00 dB  
 PL13 20.00 dB  
 SFO2 299.8711995 MHz

F2 - Processing parameters  
 SI 32768  
 SF 75.4023410 MHz  
 WDW EM  
 SSB 0  
 LB 1.00 Hz  
 GB 0  
 PC 1.40

10 NMR plot parameters  
 CX 20.00 cm  
 F1P 215.000 ppm  
 F1 16211.50 Hz  
 F2P -5.000 ppm  
 F2 -377.01 Hz  
 PPMCM 11.00000 ppm/cm  
 HZCM 629.42578 Hz/cm

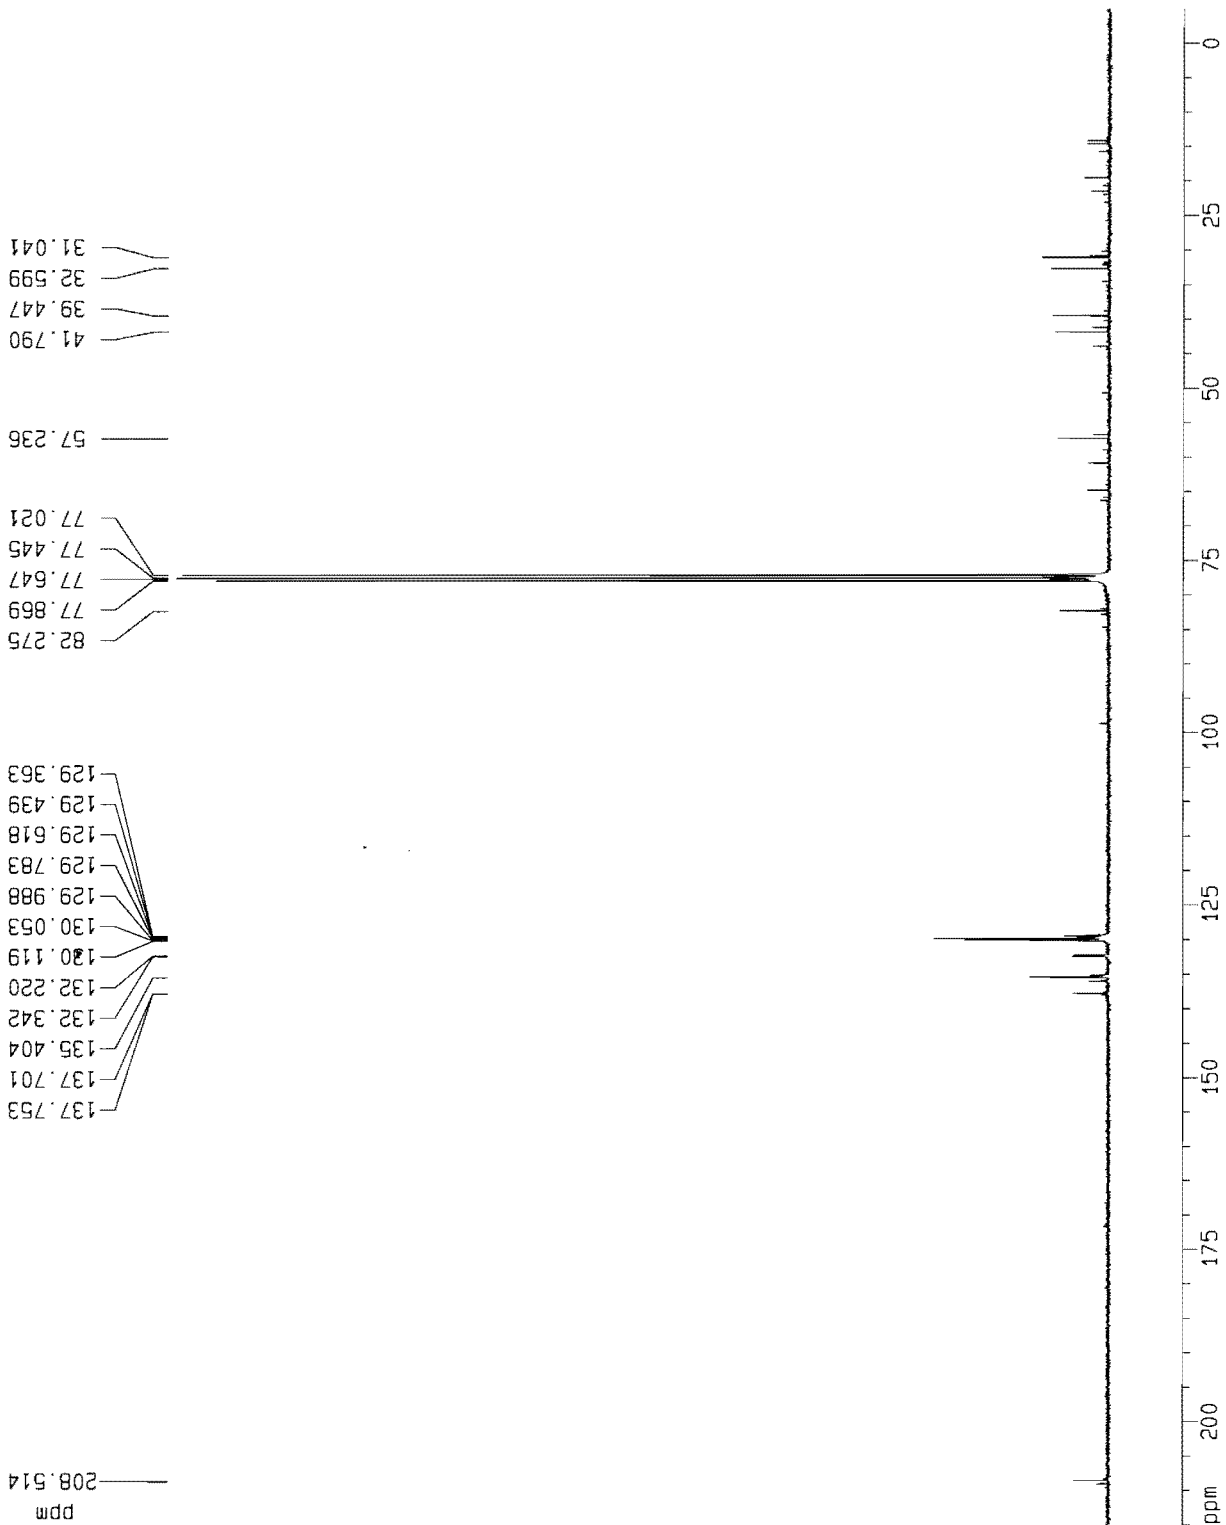

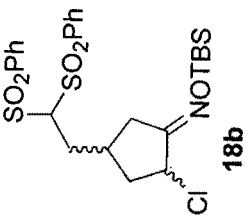

Current Data Parameters  
 NAME Jul15-2010-wein  
 EXPNO 20  
 PROCNO 1

F2 - Acquisition Parameters  
 Date\_ 20100715  
 Time 16.54  
 INSTRUM spect  
 PROBHD 5 mm QNP 1H/1  
 PULPROG zg30  
 TO 65536  
 SOLVENT CDCl3  
 NS 16  
 DS 2  
 SWH 6172.839 Hz  
 FIDRES 0.094190 Hz  
 AQ 5.3084660 sec  
 RG 362  
 DW 81.000 usec  
 DE 6.00 usec  
 TE 300.0 K  
 D1 1.00000000 sec

===== CHANNEL f1 =====  
 NUC1 1H  
 P1 11.70 usec  
 PL1 0.00 dB  
 SF01 299.8718516 MHz

F2 - Processing parameters  
 SI 32768  
 SF 299.8700575 MHz  
 WDW EM  
 SSB 0  
 LB 0.30 Hz  
 GB 0  
 PC 1.00

1D NMR plot parameters  
 CX 20.00 cm  
 F1P 11.000 ppm  
 F1 3298.57 Hz  
 F2P -1.000 ppm  
 F2 -299.87 Hz  
 PPMCM 0.60000 ppm/cm  
 HZCM 179.92203 Hz/cm

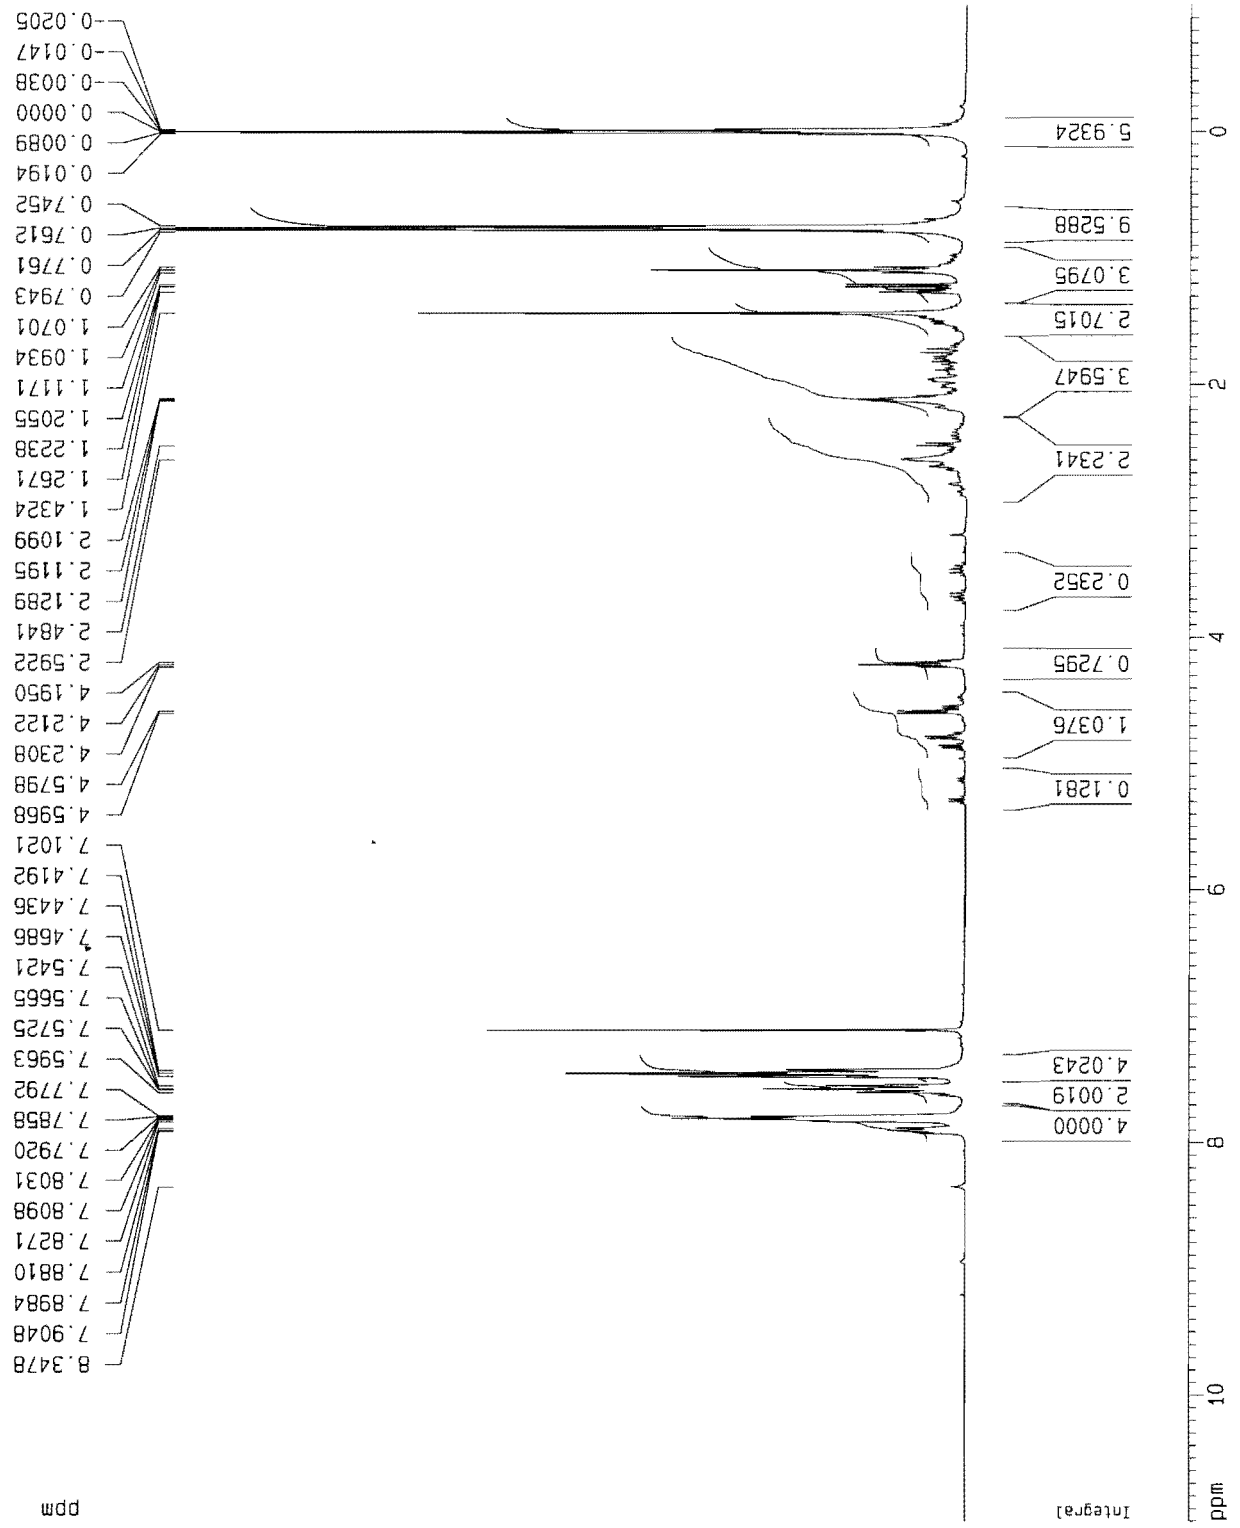

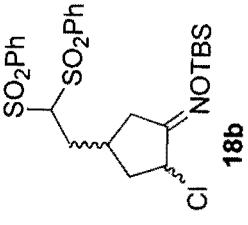

Current Data Parameters  
 NAME Jul15-2010-Wein  
 EXPNO 22  
 PROCNO 1

F2 - Acquisition Parameters  
 Date\_ 20100715  
 Time 17.19  
 INSTRUM spect  
 PROBHD 5 mm GNP 1H/1  
 PULPROG zgpg30  
 TD 65536  
 SOLVENT CDCl3  
 NS 2130  
 DS 4  
 SWH 18796.992 Hz  
 FIDRES 0.286819 Hz  
 AG 1.7433075 sec  
 RG 1024  
 DM 26.600 usec  
 DE 6.00 usec  
 TE 300.0 K  
 D1 2.00000000 sec  
 D11 0.03000000 sec  
 D12 0.00002000 sec

===== CHANNEL f1 =====  
 NUC1 13C  
 P1 5.40 usec  
 PL1 -6.00 dB  
 SF01 75.4106357 MHz

===== CHANNEL f2 =====  
 CPDPRG2 waltz16  
 NUC2 1H  
 PCPD2 115.00 usec  
 PL2 0.00 dB  
 PL12 20.00 dB  
 PL13 20.00 dB  
 SF02 299.8711995 MHz

F2 - Processing parameters  
 SI 32768  
 SF 75.4023410 MHz  
 MDW EM  
 SSB 0  
 LB 1.00 Hz  
 GB 0  
 PC 1.40

1D NMR plot parameters  
 CX 20.00 cm  
 F1P 215.000 ppm  
 F1 16211.50 Hz  
 F2P -5.000 ppm  
 F2 -377.01 Hz  
 PRMCM 11.00000 ppm/cm  
 HZCM 829.42578 Hz/cm

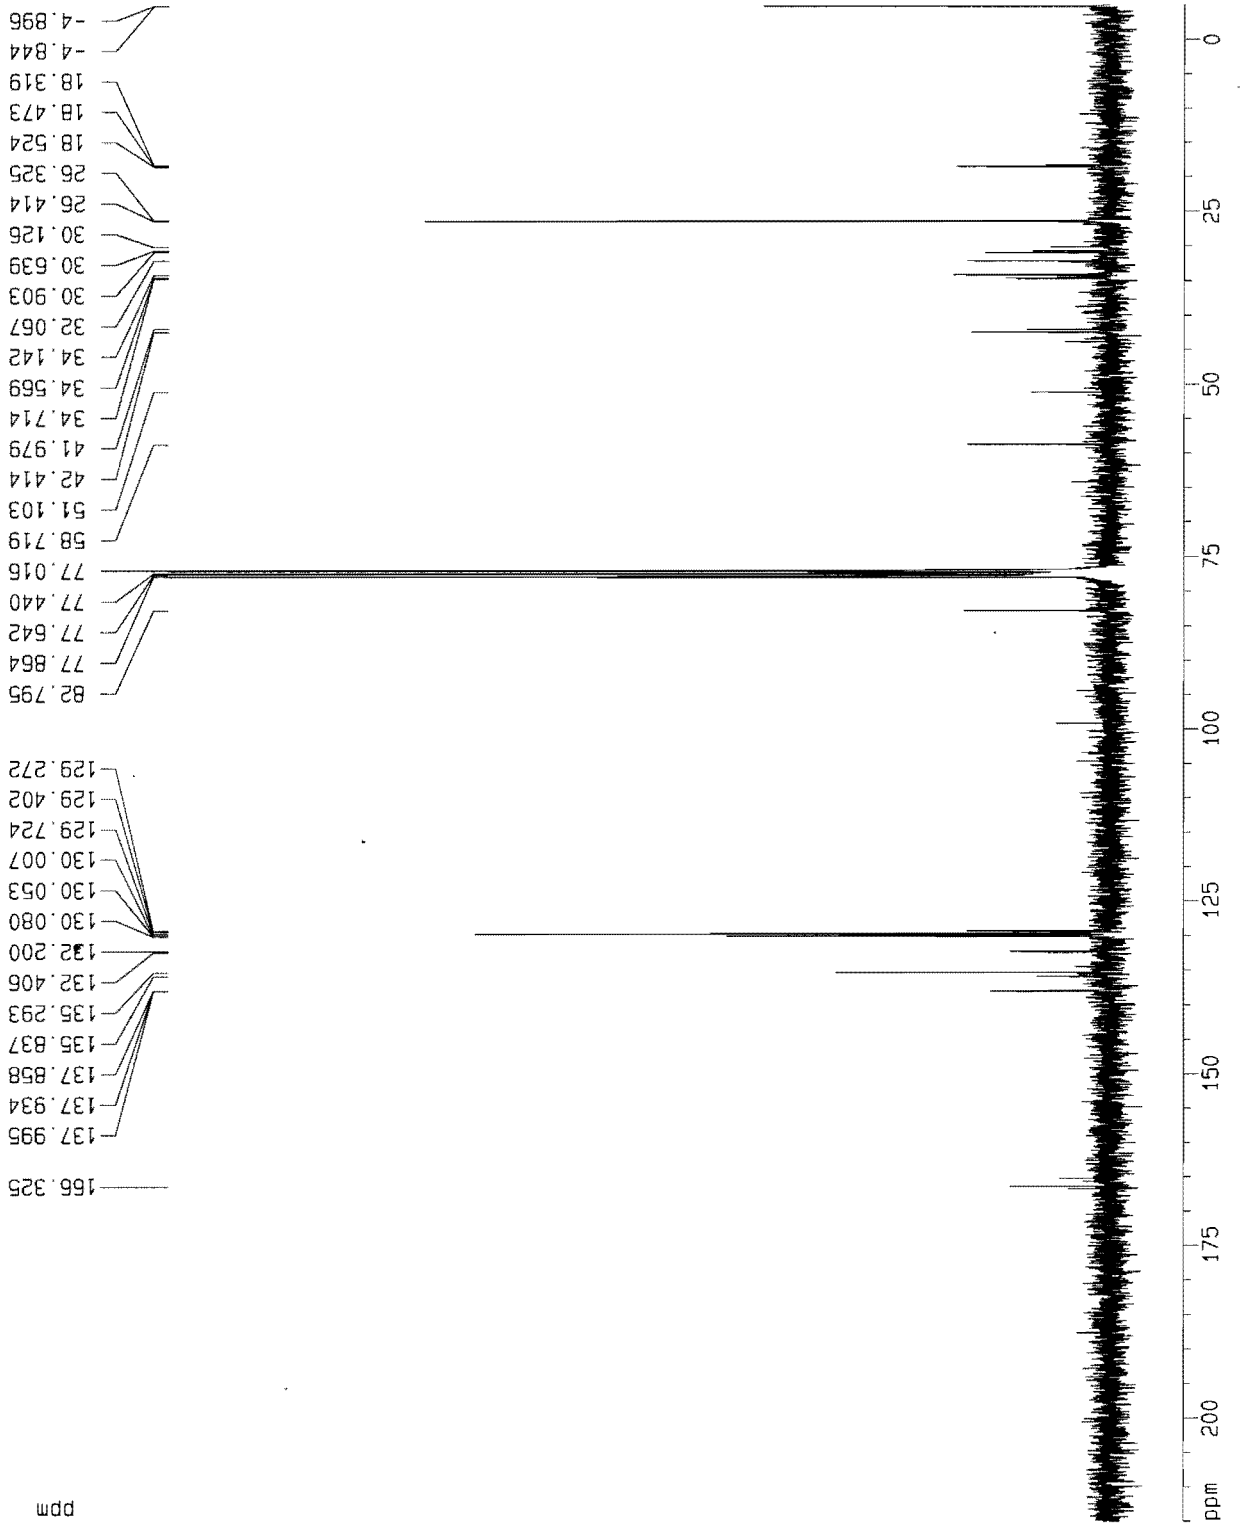

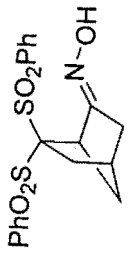

20

Current Data Parameters  
 NAME Jul16-2010-Wein  
 EXPNO 10  
 PROCNO 1

F2 - Acquisition Parameters

Date\_ 20100716  
 Time 18.21  
 INSTRUM spect  
 PROBHD 5 mm QNP 1H/1  
 PULPROG zg30  
 TD 65536  
 SOLVENT CDCl3  
 NS 36  
 DS 0  
 SWH 6172.839 Hz  
 FIDRES 0.094190 Hz  
 AQ 5.3084660 sec  
 RG 724.1  
 DW 81.000 usec  
 DE 6.00 usec  
 TE 300.0 K  
 D1 2.00000000 sec

===== CHANNEL f1 =====

NUC1 1H  
 P1 11.70 usec  
 PL1 0.00 dB  
 SF01 299.8718518 MHz

F2 - Processing parameters

SI 32768  
 SF 299.8700576 MHz  
 WDW EM  
 SSB 0  
 LB 0.30 Hz  
 GB 0  
 PC 1.00

1D NMR plot parameters

CX 20.00 cm  
 F1P 11.000 ppm  
 F1 3298.57 Hz  
 F2 -1.000 ppm  
 F2 -299.87 Hz  
 PPMCM 0.60000 ppm/cm  
 HZCM 179.92203 Hz/cm

3.25682  
 2.61219  
 2.60394  
 2.45085  
 2.44176  
 2.43070  
 2.42164  
 2.39512  
 2.38834  
 2.36383  
 2.35402  
 2.27930  
 2.26746  
 1.88681  
 1.47107  
 1.45227  
 1.42222  
 1.09779  
 1.09321  
 1.07433  
 0.79820  
 0.77358  
 0.00000

8.03385  
 8.00845  
 8.00428  
 7.64653  
 7.62162  
 7.61736  
 7.53785  
 7.52427  
 7.51735  
 7.51313  
 7.49928  
 7.44233  
 7.41569  
 7.39808  
 7.39216  
 7.37206  
 7.34649  
 7.10116  
 6.98906

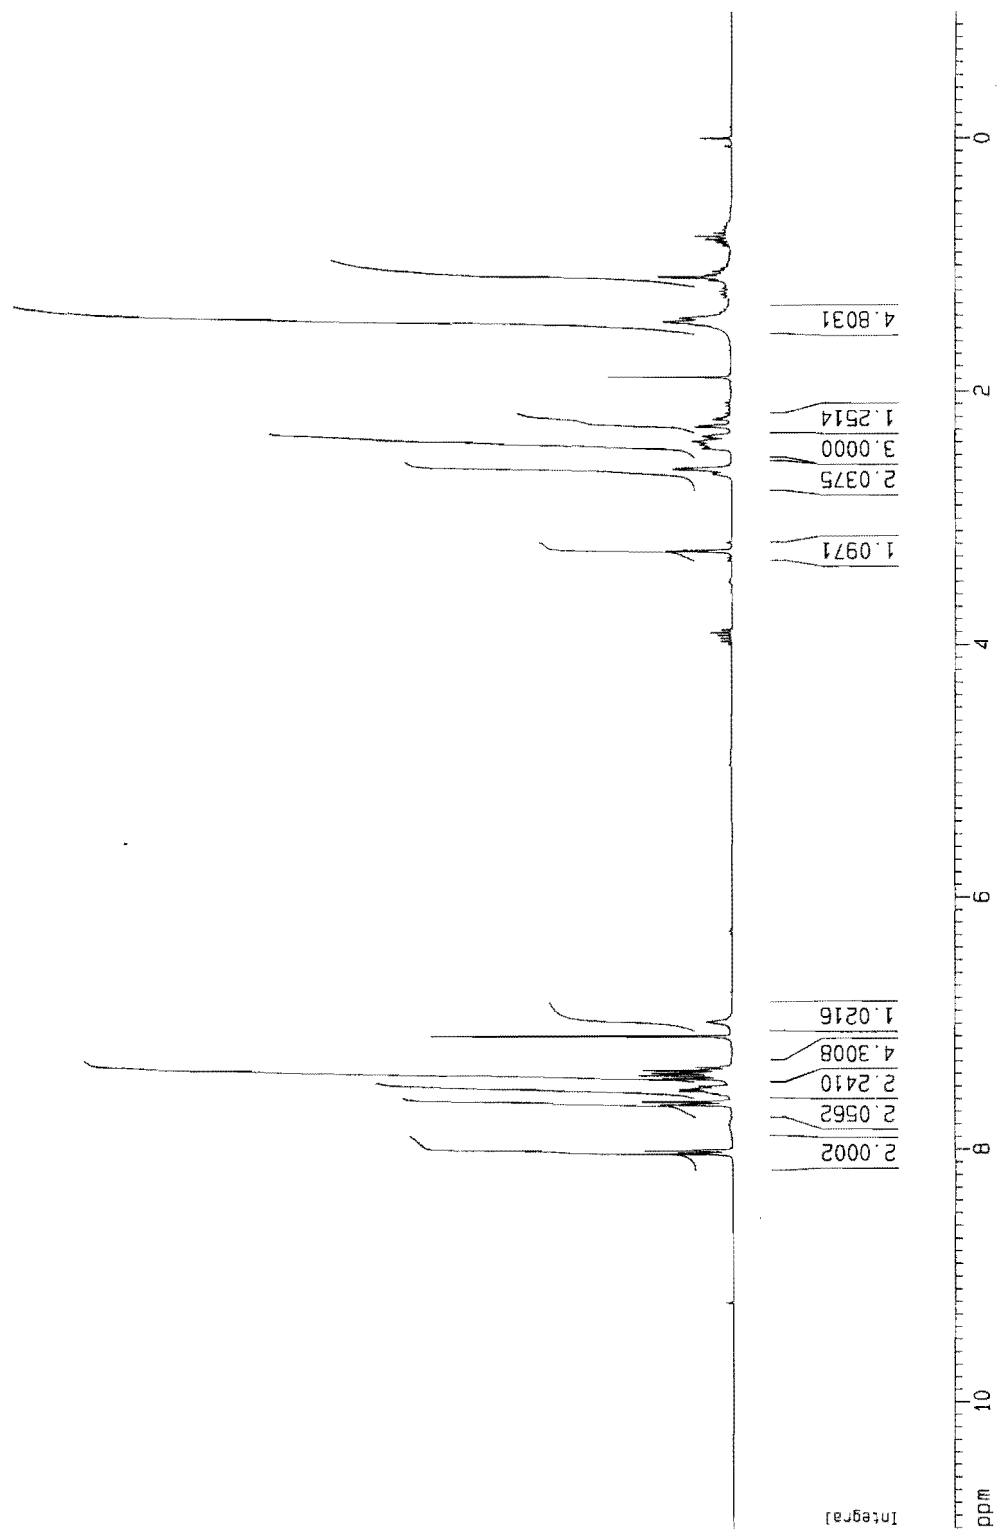

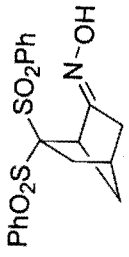

20

Current Data Parameters  
 NAME Jul16-2010-Wein  
 EXPNO 12  
 PROCNO 1

F2 - Acquisition Parameters  
 Date\_ 20100716  
 Time\_ 18.47  
 INSTRUM spect  
 PROBHD 5 mm GNP 1H/1  
 PULPROG zgpg30  
 TD 65536  
 SOLVENT CDCl3  
 NS 13978  
 DS 4  
 SWH 18796.992 Hz  
 FIDRES 0.286819 Hz  
 AQ 1.7433076 sec  
 RG 1024  
 DM 26.600 usec  
 DE 6.00 usec  
 TE 300.0 K  
 D1 2.00000000 sec  
 D11 0.03000000 sec  
 D12 0.00002000 sec

===== CHANNEL f1 =====  
 NUC1 13C  
 P1 5.40 usec  
 PL1 -6.00 dB  
 SFO1 75.4106357 MHz

===== CHANNEL f2 =====  
 CPDPRG2 waltz16  
 NUC2 1H  
 PCPD2 115.00 usec  
 PL2 0.00 dB  
 PL12 20.00 dB  
 PL13 20.00 dB  
 SFO2 299.8711995 MHz

F2 - Processing parameters  
 SI 32768  
 SF 75.4023410 MHz  
 WDW EM  
 SSB 0  
 LB 1.00 Hz  
 GB 0  
 PC 0.75

1D NMR plot parameters  
 CX 20.00 cm  
 F1P 215.000 ppm  
 F1 16211.50 Hz  
 F2P -5.000 ppm  
 F2 -377.01 Hz  
 PPMCM 11.00000 ppm/cm  
 HZCM 829.42578 Hz/cm

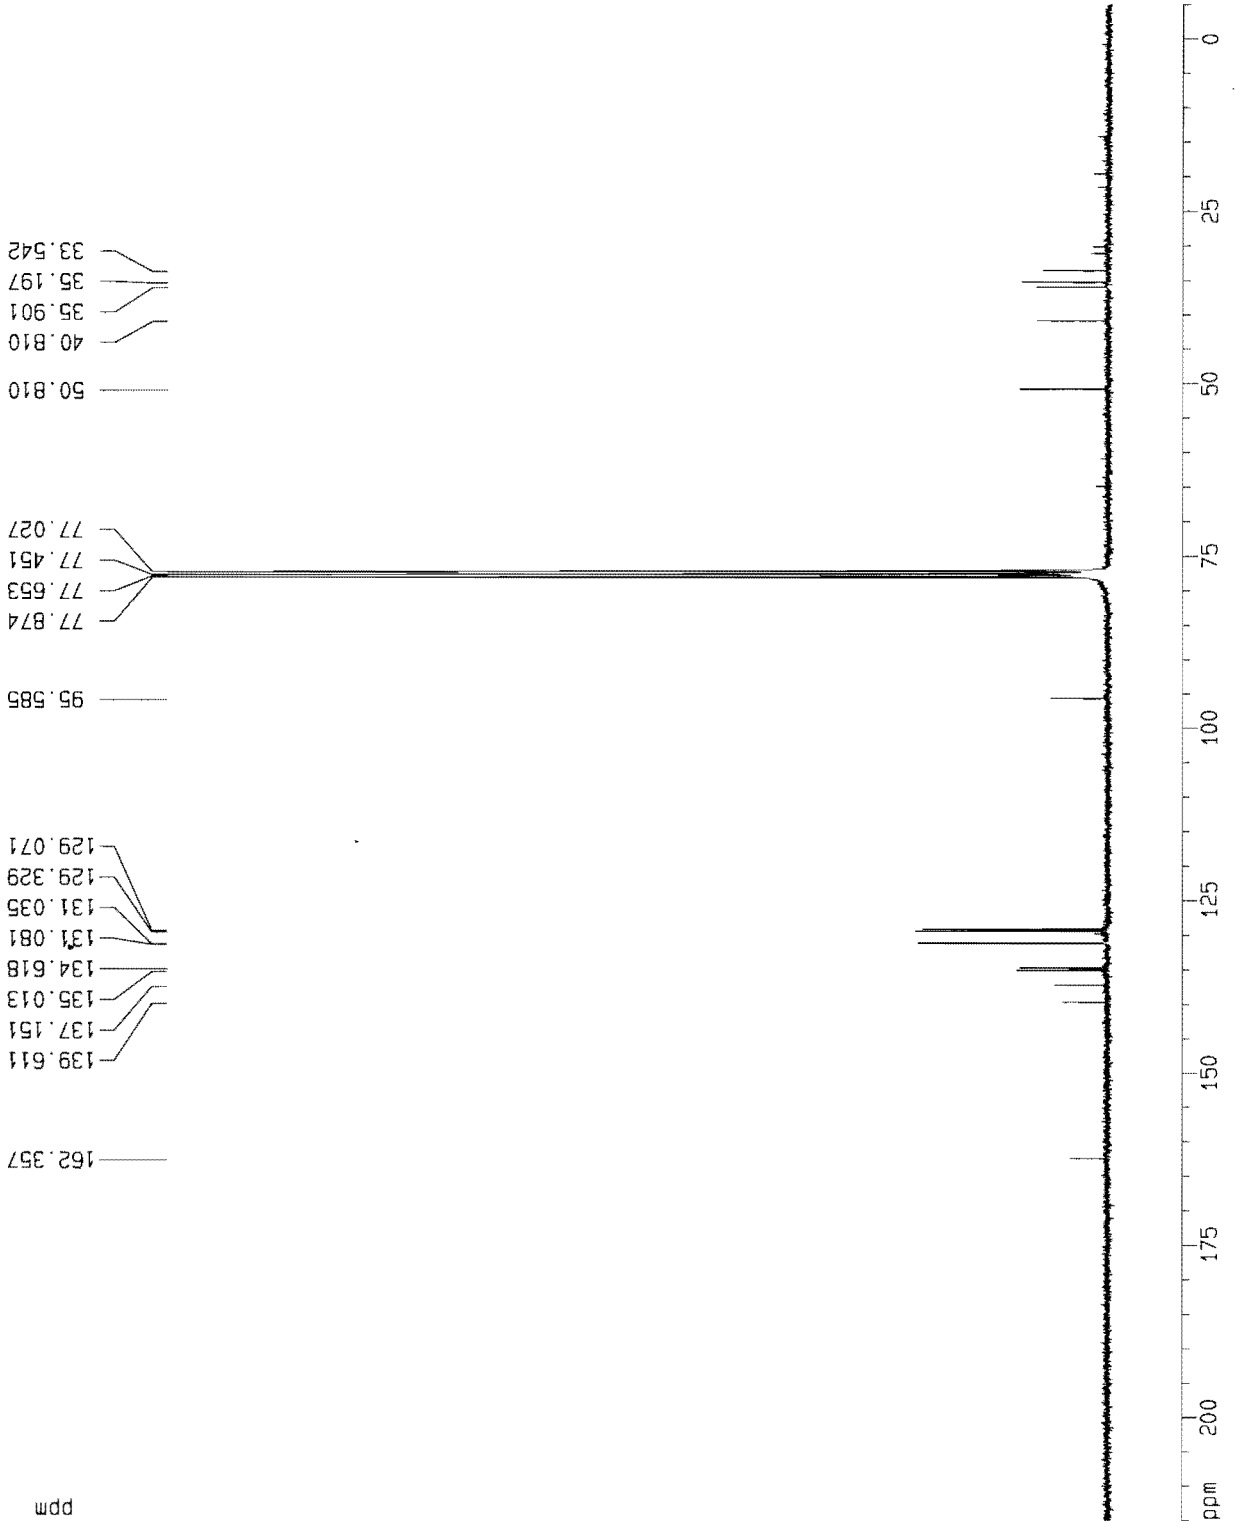

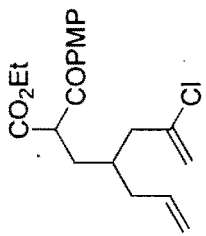

15c

Current Data Parameters  
 NAME Oct18-2007-wein  
 EXPNO 10  
 PROCNO 1

F2 - Acquisition Parameters  
 Date\_ 20071018  
 Time 14.08  
 INSTRUM spect  
 PROBHD 5 mm QNP 1H/1  
 PULPROG zg30  
 TD 65536  
 SOLVENT CDCl<sub>3</sub>  
 NS 16  
 DS 2  
 SWH 6172.839 Hz  
 FIDRES 0.094190 Hz  
 AQ 5.3084660 sec  
 RG 35.9  
 DW 81.000 usec  
 DE 6.00 usec  
 TE 300.0 K  
 D1 1.00000000 sec

===== CHANNEL f1 =====  
 NUC1 1H  
 P1 11.70 usec  
 PL1 0.00 dB  
 SF01 299.8718518 MHz

F2 - Processing parameters  
 SI 32768  
 SF 299.8700000 MHz  
 WDW EM  
 SSB 0  
 LB 0.30 Hz  
 GB 0  
 PC 1.00

1D NMR plot parameters  
 CX 20.00 cm  
 F1P 11.000 ppm  
 F1 3298.57 Hz  
 F2P -1.000 ppm  
 F2 -299.87 Hz  
 PPMCM 0.50000 ppm/cm  
 HZCM 179.92200 Hz/cm

0.85948  
 1.13562  
 1.15936  
 1.18315  
 1.91436  
 1.92855  
 1.93412  
 1.94458  
 1.96627  
 2.04977  
 2.05939  
 2.07709  
 2.29676  
 2.31789  
 3.84226  
 4.08737  
 4.11115  
 4.13494  
 4.15870  
 4.40455  
 4.40874  
 5.03196  
 5.03582  
 5.05459  
 5.05826  
 5.07486  
 5.07807  
 5.08329  
 5.14670  
 5.18085  
 5.18722  
 5.19133  
 5.67925  
 5.70313  
 6.91458  
 6.94277  
 7.95532  
 7.95974  
 7.96616  
 7.98491  
 7.98944  
 7.99885

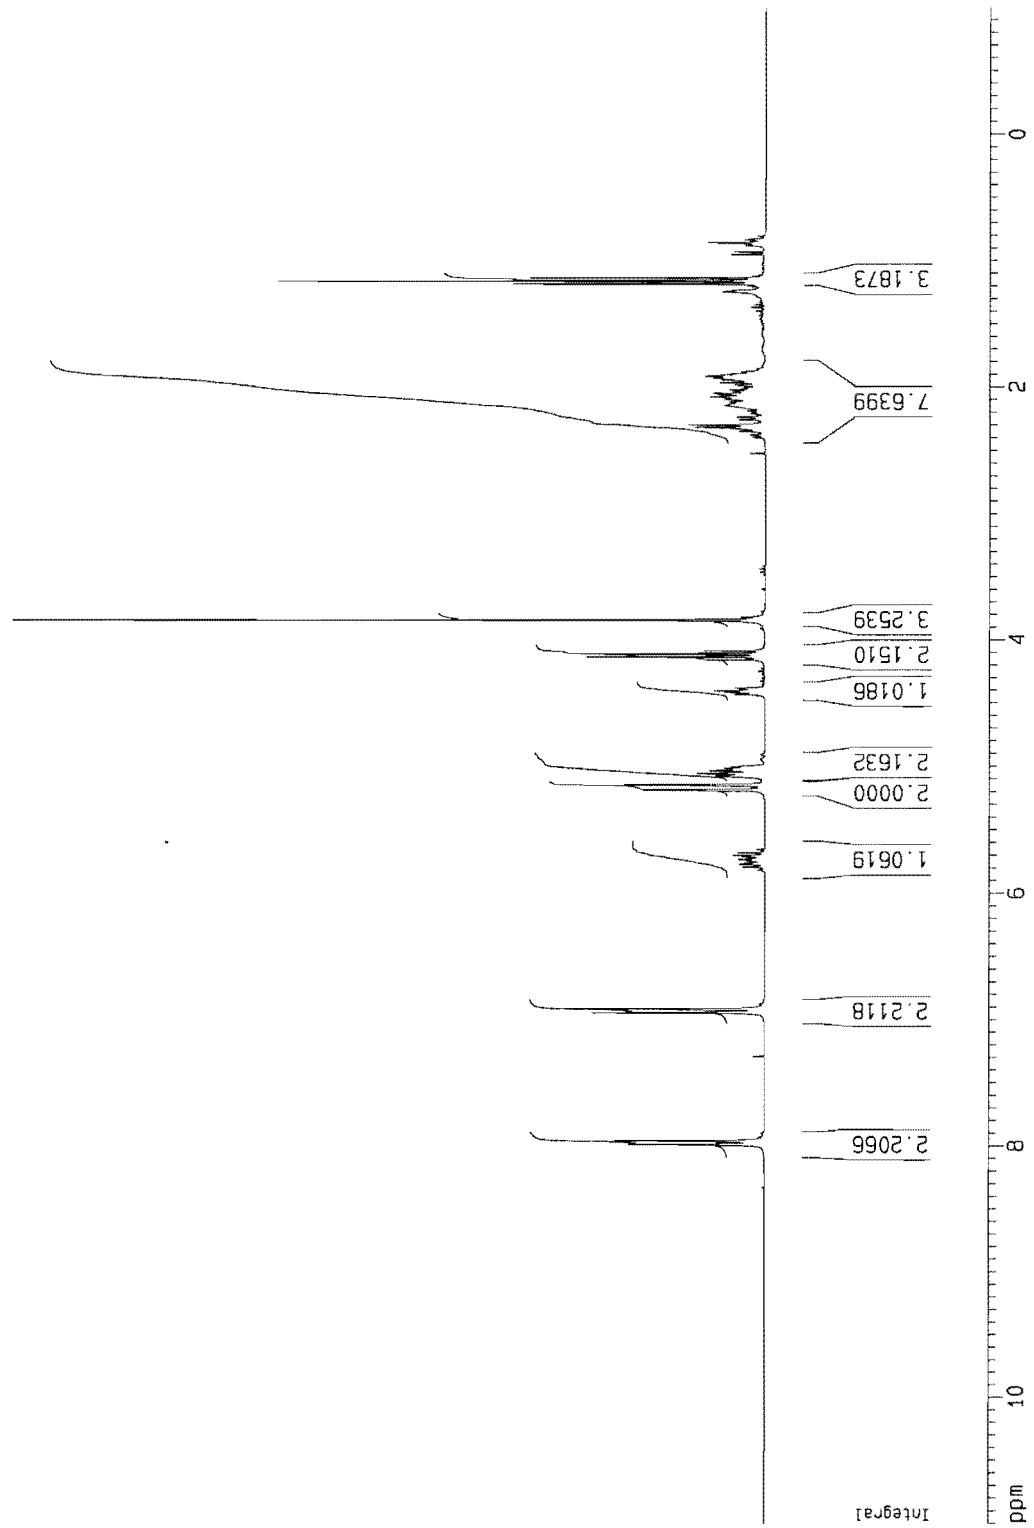

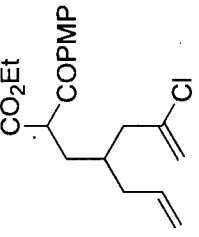

15c

Current Data Parameters  
 NAME Dct18-2007-Wein  
 EXPNO 11  
 PROCNO 1

F2 - Acquisition Parameters  
 Date\_ 20071018  
 Time 14.21  
 INSTRUM spect  
 PROBHD 5 mm QNP 1H/1  
 PULPROG zgpg30  
 TD 65536  
 SOLVENT CDC13  
 NS 180  
 DS 4  
 SWH 18796.992 Hz  
 FIDRES 0.286819 Hz  
 AQ 1.7433075 sec  
 RG 4095  
 DM 26.600 usec  
 DE 6.00 usec  
 TE 300.0 K  
 D1 2.00000000 sec  
 D11 0.03000000 sec  
 D12 0.00002000 sec

\*\*\*\*\* CHANNEL f1 \*\*\*\*\*  
 NUC1 13C  
 P1 5.40 usec  
 PL1 -6.00 dB  
 SF01 75.4106357 MHz

\*\*\*\*\* CHANNEL f2 \*\*\*\*\*  
 CPDPRG2 waltz16  
 NUC2 1H  
 PCPD2 115.00 usec  
 PL2 0.00 dB  
 PL12 20.00 dB  
 PL13 20.00 dB  
 SF02 299.8711995 MHz

F2 - Processing parameters  
 SI 32768  
 SF 75.4023191 MHz  
 WDW EM  
 SSB 0  
 LB 1.00 Hz  
 GB 0  
 PC 1.40

1D NMR plot parameters  
 CX 20.00 cm  
 F1P 215.000 ppm  
 F1 16211.50 Hz  
 F2P -5.000 ppm  
 F2 -377.01 Hz  
 PPMCM 11.00000 ppm/cm  
 HZCM 829.42554 Hz/cm

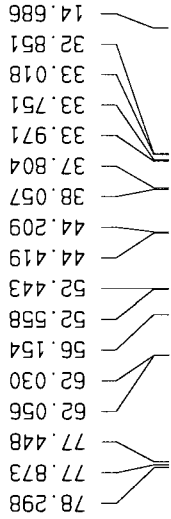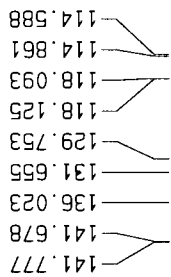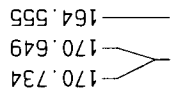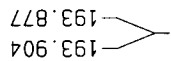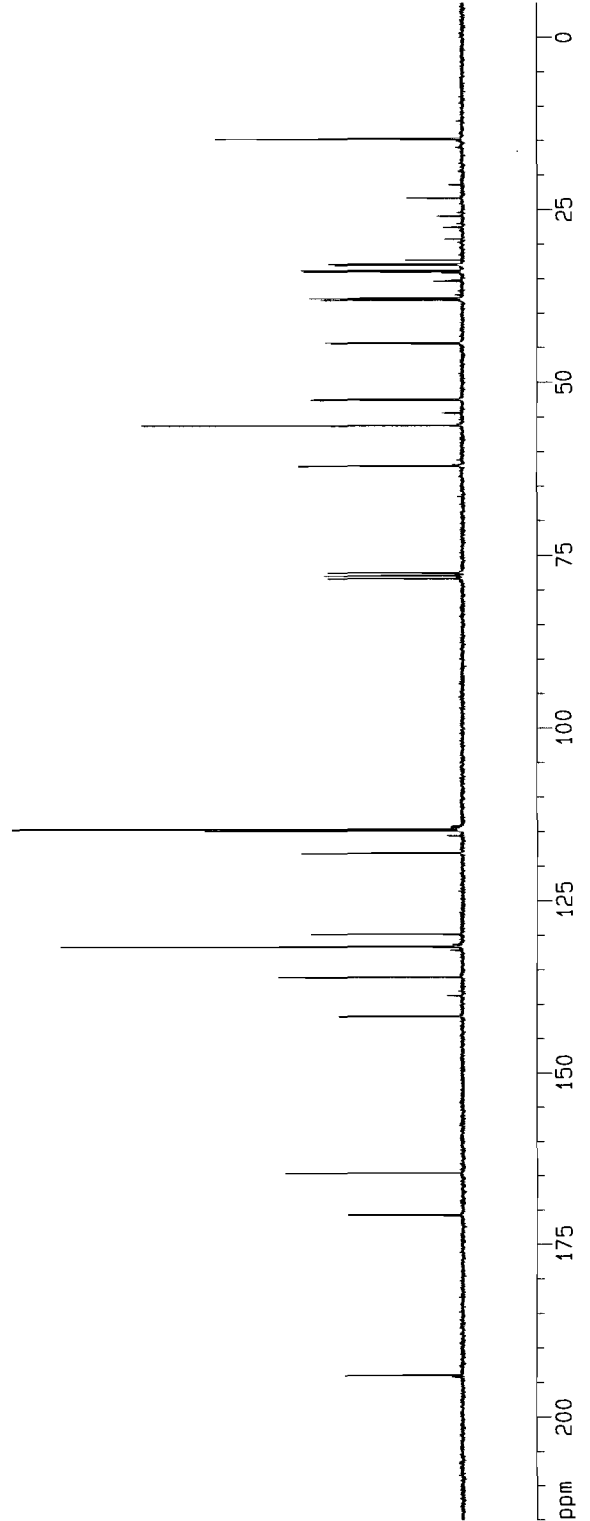

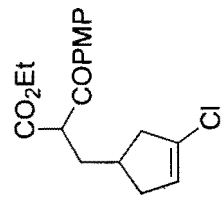

**16c**

Current Data Parameters

NAME Dec03-2010-Wein  
EXPNO 10  
PROCNO 1

F2 - Acquisition Parameters

Date\_ 20101203  
Time 19.34  
INSTRUM spect  
PROBHD 5 mm GNP 1H/1  
PULPROG zg30  
TD 65536  
SOLVENT CDCl3  
NS 16  
DS 2  
SWH 6172.839 Hz  
FIDRES 0.094190 Hz  
AQ 5.3084660 sec  
RG 322.5  
DM B1.000 usec  
DE 6.00 usec  
TE 300.0 K  
D1 1.00000000 sec

===== CHANNEL f1 =====

NUC1 1H  
P1 11.70 usec  
PL1 0.00 dB  
SF01 299.8718518 MHz

F2 - Processing parameters

SI 32768  
SF 299.8700294 MHz  
WDW EM  
SSB 0  
LB 0.30 Hz  
GB 0  
PC 1.00

1D NMR plot parameters

CX 20.00 cm  
F1P 11.000 ppm  
F1 3298.57 Hz  
F2P -1.000 ppm  
F2 -299.87 Hz  
PPMCM 0.60000 ppm/cm  
HZCM 179.92201 Hz/cm

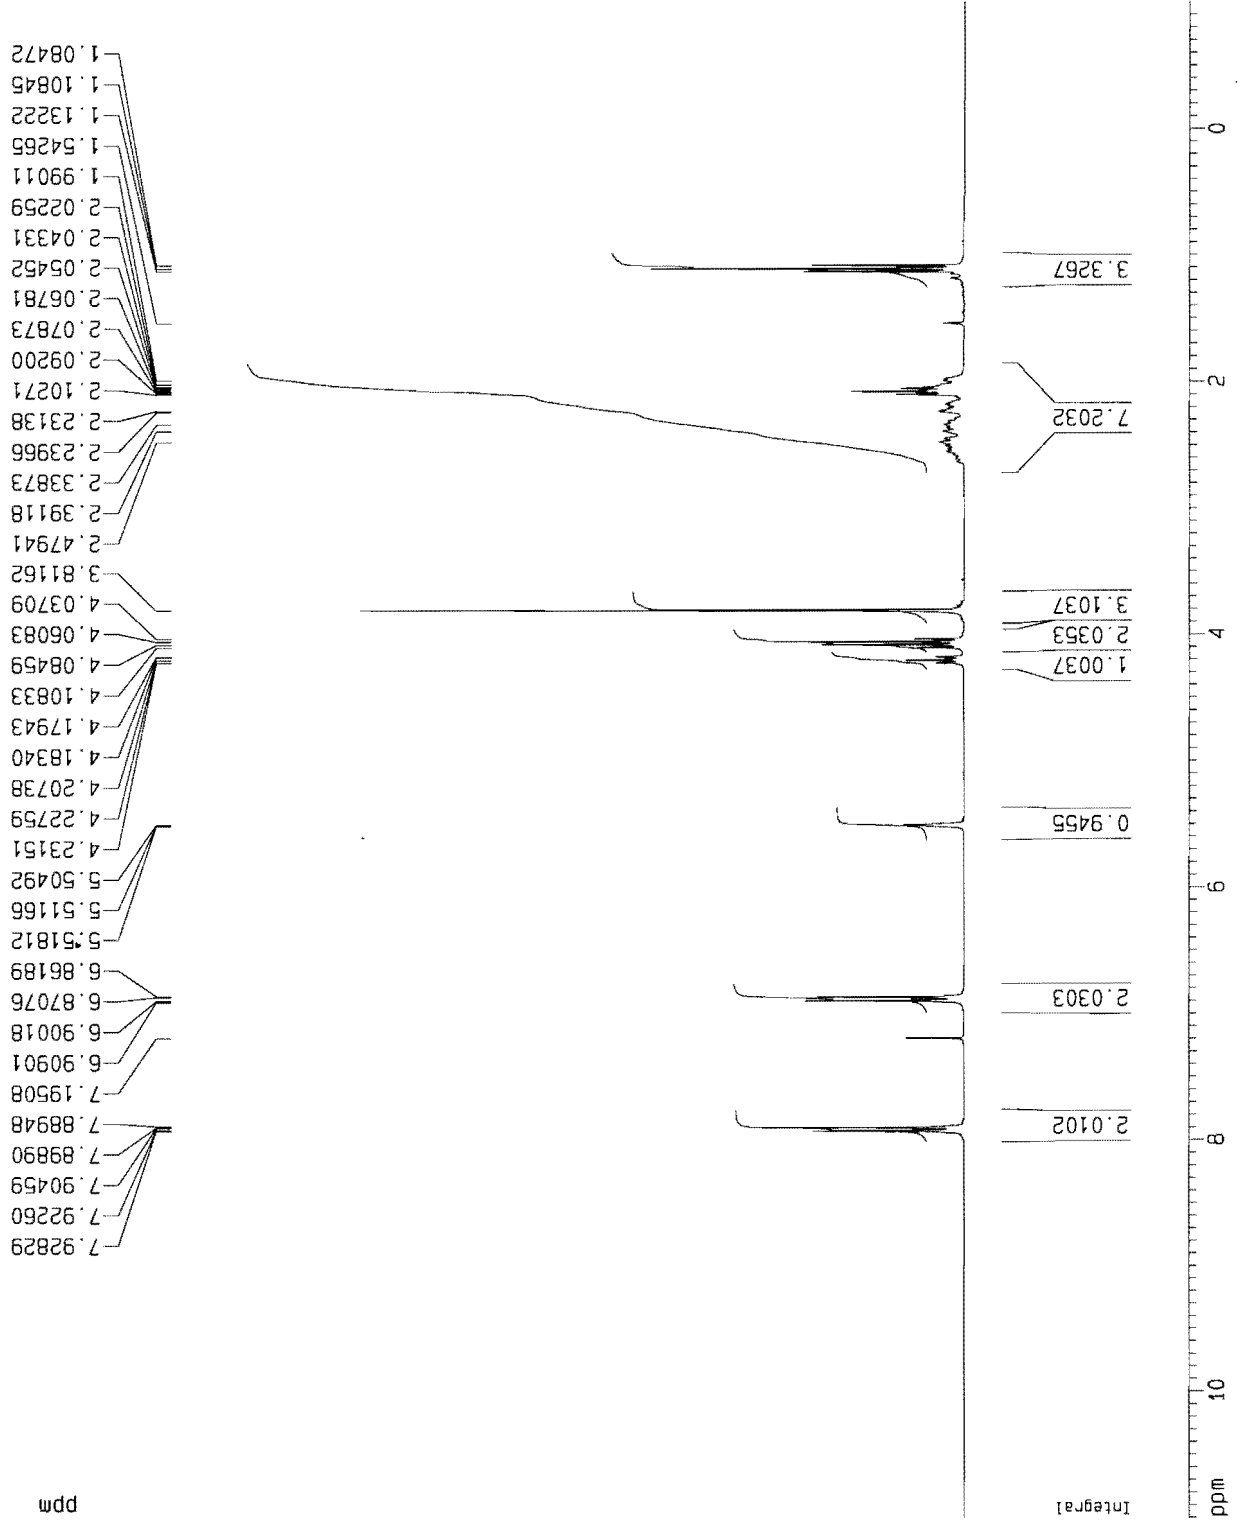



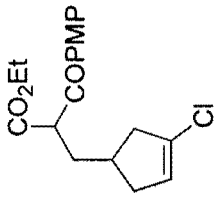

**16c**

Current Data Parameters  
 NAME Dec03-2010-We.in  
 EXPNO 12  
 PROCNO 1

F2 - Acquisition Parameters  
 Date\_ 20101203  
 Time 20.37  
 INSTRUM spect  
 PROBHD 5 mm QNP 1H/1  
 PULPROG zgpg30  
 TD 65536  
 SOLVENT CDC13  
 NS 12867  
 DS 4  
 SWH 18796.992 Hz  
 FIDRES 0.286819 Hz  
 AQ 1.7433076 sec  
 RG 8192  
 DW 26.600 usec  
 DE 6.00 usec  
 TE 300.0 K  
 O1 2.00000000 sec  
 O11 0.03000000 sec  
 O12 0.00002000 sec

===== CHANNEL f1 =====  
 NUC1 13C  
 P1 5.40 usec  
 PL1 -6.00 dB  
 SF01 75.4106357 MHz

===== CHANNEL f2 =====  
 CPDPRG2 waltz16  
 NUC2 1H  
 PCPD2 115.00 usec  
 PL2 0.00 dB  
 PL12 20.00 dB  
 PL13 20.00 dB  
 SF02 299.6711995 MHz

F2 - Processing parameters  
 SI 32768  
 SF 75.4023620 MHz  
 WDW EM  
 SSB 0  
 LB 1.00 Hz  
 GB 0  
 PC 1.40

10 NMR plot parameters  
 CX 20.00 cm  
 F1P 215.000 ppm  
 F1 16211.51 Hz  
 F2P -5.000 ppm  
 F2 -377.01 Hz  
 PPMCM 11.00000 ppm/cm  
 HZCM 829.42596 Hz/cm

14.162  
 35.313  
 35.336  
 35.696  
 37.769  
 37.793  
 43.487  
 52.541  
 52.616  
 55.676  
 61.594  
 76.739  
 77.163  
 77.366  
 77.587

114.116  
 125.563  
 125.588  
 129.266  
 129.318  
 131.112  
 131.225

164.071  
 170.084

193.241  
 193.291

ppm

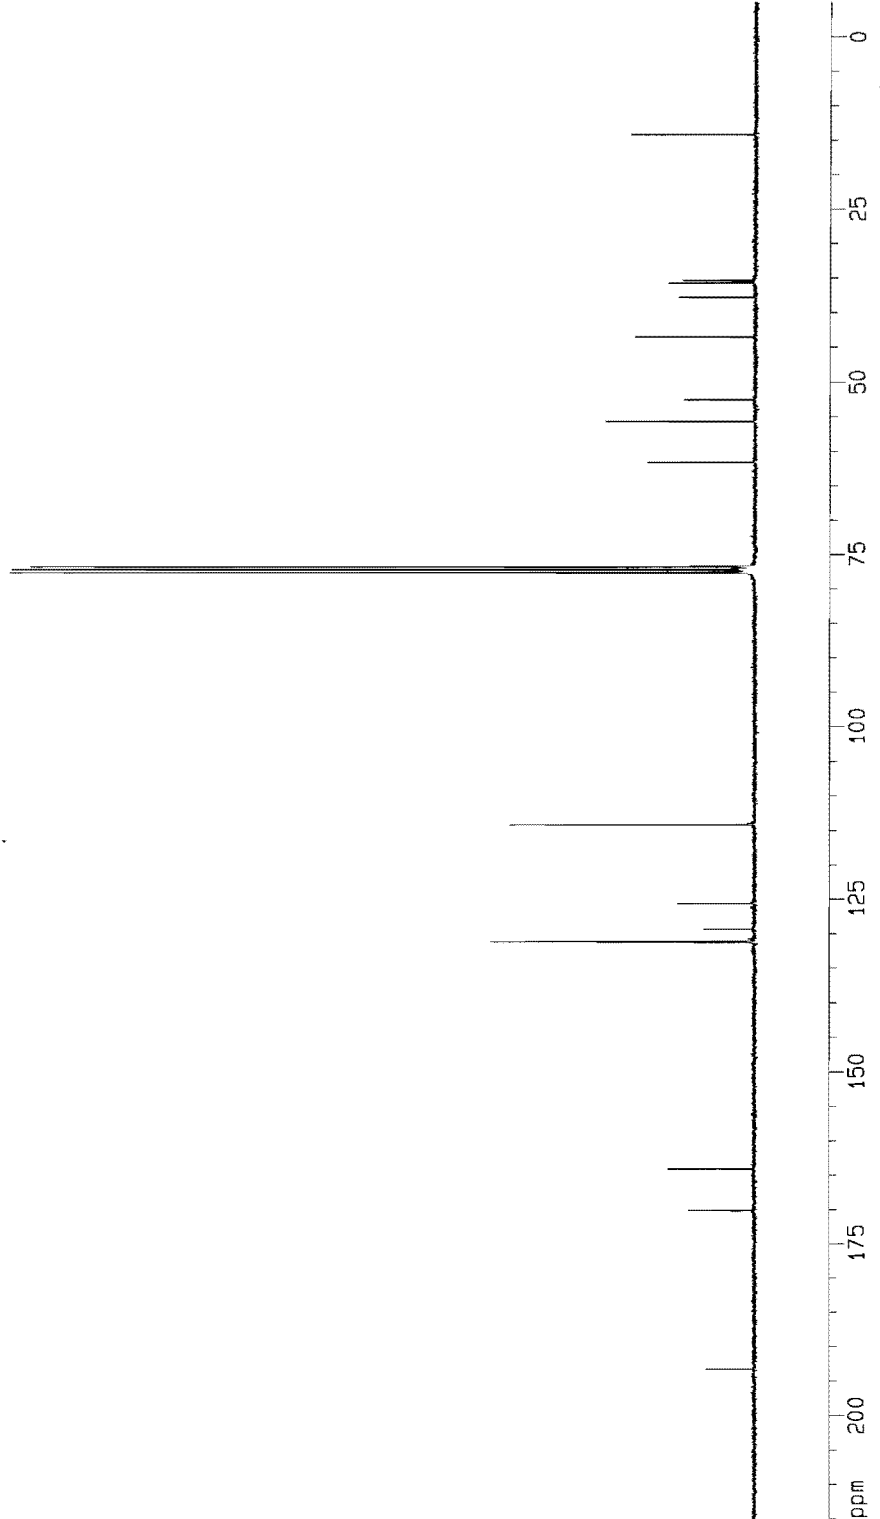

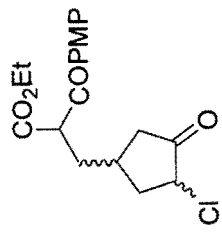

Current Data Parameters  
 NAME Nov06-2007-Wein  
 EXPNO 10  
 PROCNO 1

F2 - Acquisition Parameters  
 Date\_ 20071108  
 Time 17.00  
 INSTRUM spect  
 PROBHD 5 mm QNP 1H/1  
 PULPROG zg30  
 TD 65536  
 SOLVENT CDCl3  
 NS 16  
 DS 2  
 SWH 6172.839 Hz  
 FIDRES 0.094190 Hz  
 AQ 5.3084660 sec  
 RG 203.2  
 DW 81.000 usec  
 DE 6.00 usec  
 TE 300.0 K  
 D1 1.00000000 sec

===== CHANNEL f1 =====  
 NUC1 1H  
 P1 11.70 usec  
 PL1 0.00 dB  
 SF01 299.8716516 MHz

F2 - Processing parameters  
 SI 32768  
 SF 299.8700287 MHz  
 WDW EM  
 SSB 0  
 LB 0.30 Hz  
 GB 0  
 PC 1.00

1D NMR plot parameters  
 CX 20.00 cm  
 F1P 11.000 ppm  
 F1 3299.57 Hz  
 F2P -1.000 ppm  
 F2 -299.87 Hz  
 PPMCM 0.60000 ppm/cm  
 HZCM 179.92201 Hz/cm

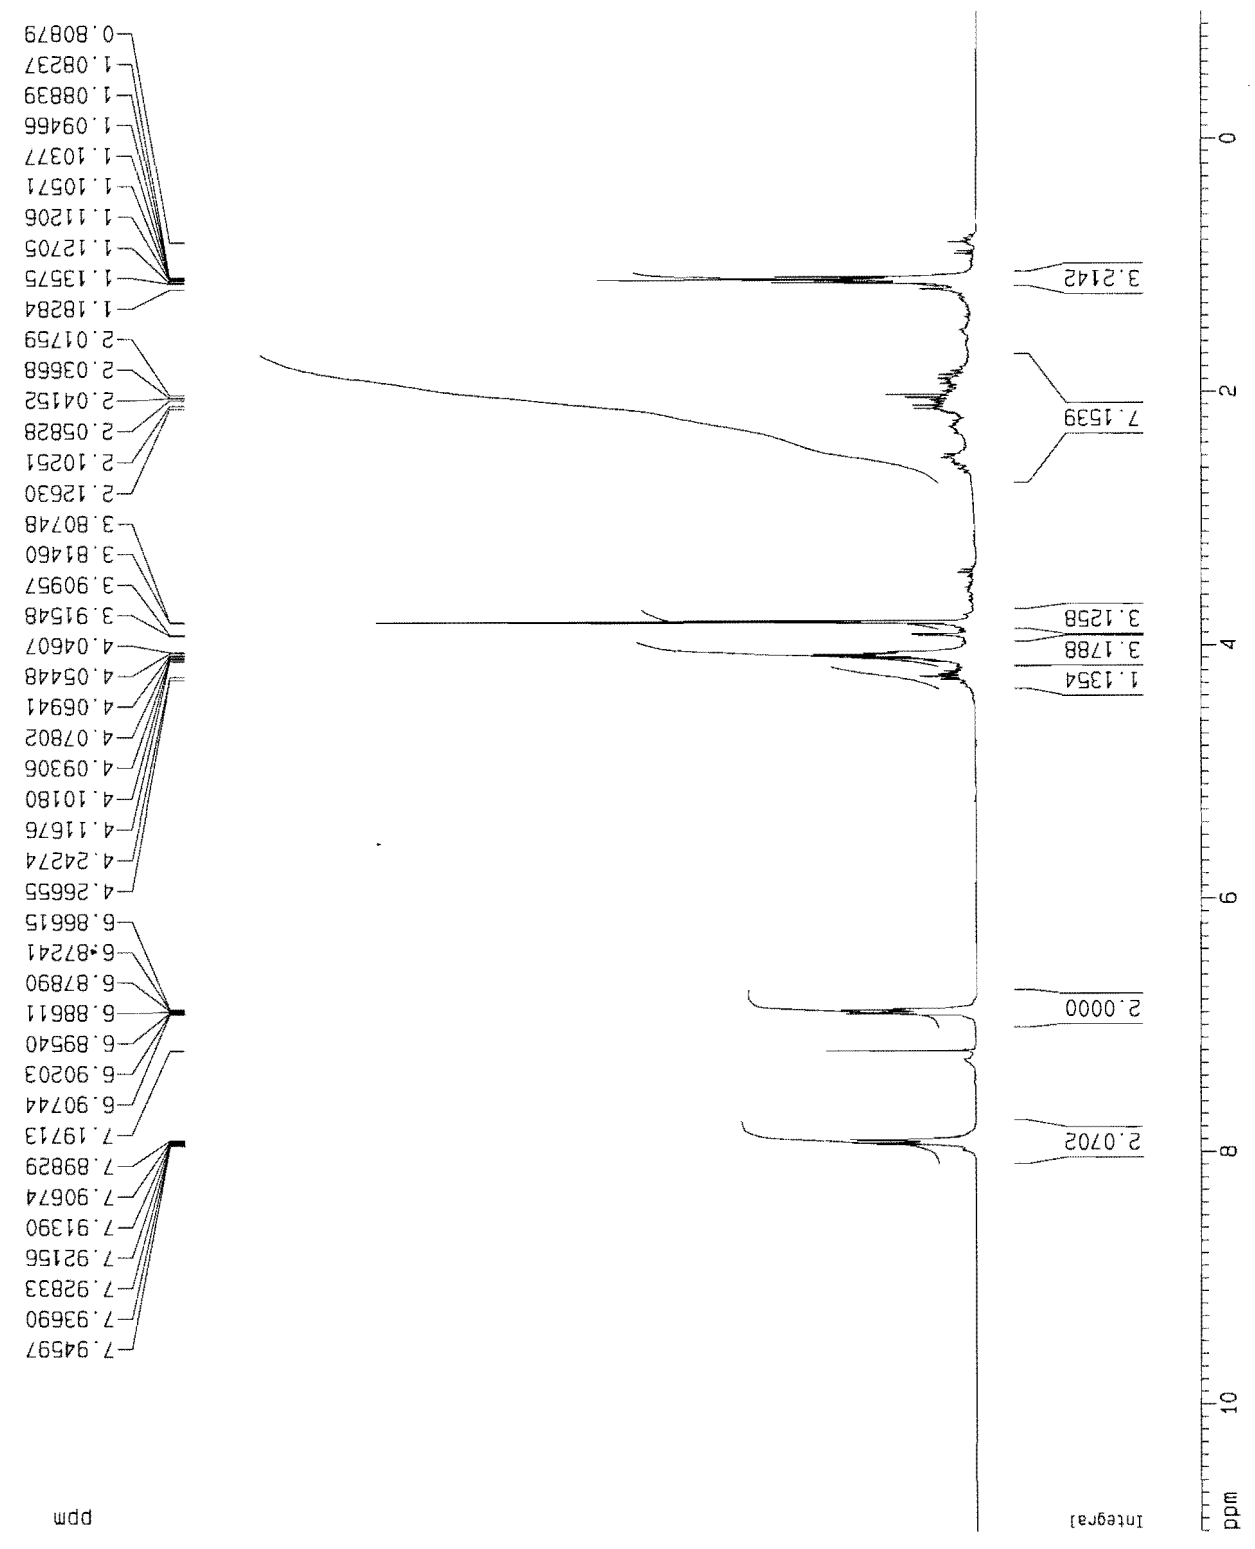

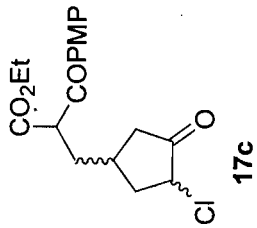

Current Data Parameters  
 NAME Nov08-2007-Wein  
 EXPNO 12  
 PROCNO 1

F2 - Acquisition Parameters  
 Date\_ 20071108  
 Time 17.23  
 INSTRUM spect  
 PROBHD 5 mm GNP 1H/1  
 PULPROG zgpg30  
 TO 65536  
 SOLVENT COCl3  
 NS 4314  
 DS 4  
 SWH 18796.992 Hz  
 FIDRES 0.286819 Hz  
 AQ 1.7433076 sec  
 RG 4096  
 DW 26.600 usec  
 DE 6.00 usec  
 TE 300.0 K  
 D1 2.00000000 sec  
 D11 0.03000000 sec  
 D12 0.00002000 sec

===== CHANNEL f1 =====  
 NUC1 13C  
 P1 5.40 usec  
 PL1 -6.00 dB  
 SF01 75.4106357 MHz

===== CHANNEL f2 =====  
 CPOPRG2 waltz16  
 NUC2 1H  
 PCPD2 115.00 usec  
 PL2 0.00 dB  
 PL12 20.00 dB  
 PL13 20.00 dB  
 SF02 299.8711995 MHz

F2 - Processing parameters  
 SI 32768  
 SF 75.4023410 MHz  
 WDW EM  
 SSB 0  
 LB 1.00 Hz  
 GB 0  
 PC 1.40

1D NMR plot parameters  
 CX 20.00 cm  
 F1P 215.000 ppm  
 F1 16211.50 Hz  
 F2P -5.000 ppm  
 F2 -377.01 Hz  
 PPMCM 11.00000 ppm/cm  
 HZCM 829.42578 Hz/cm

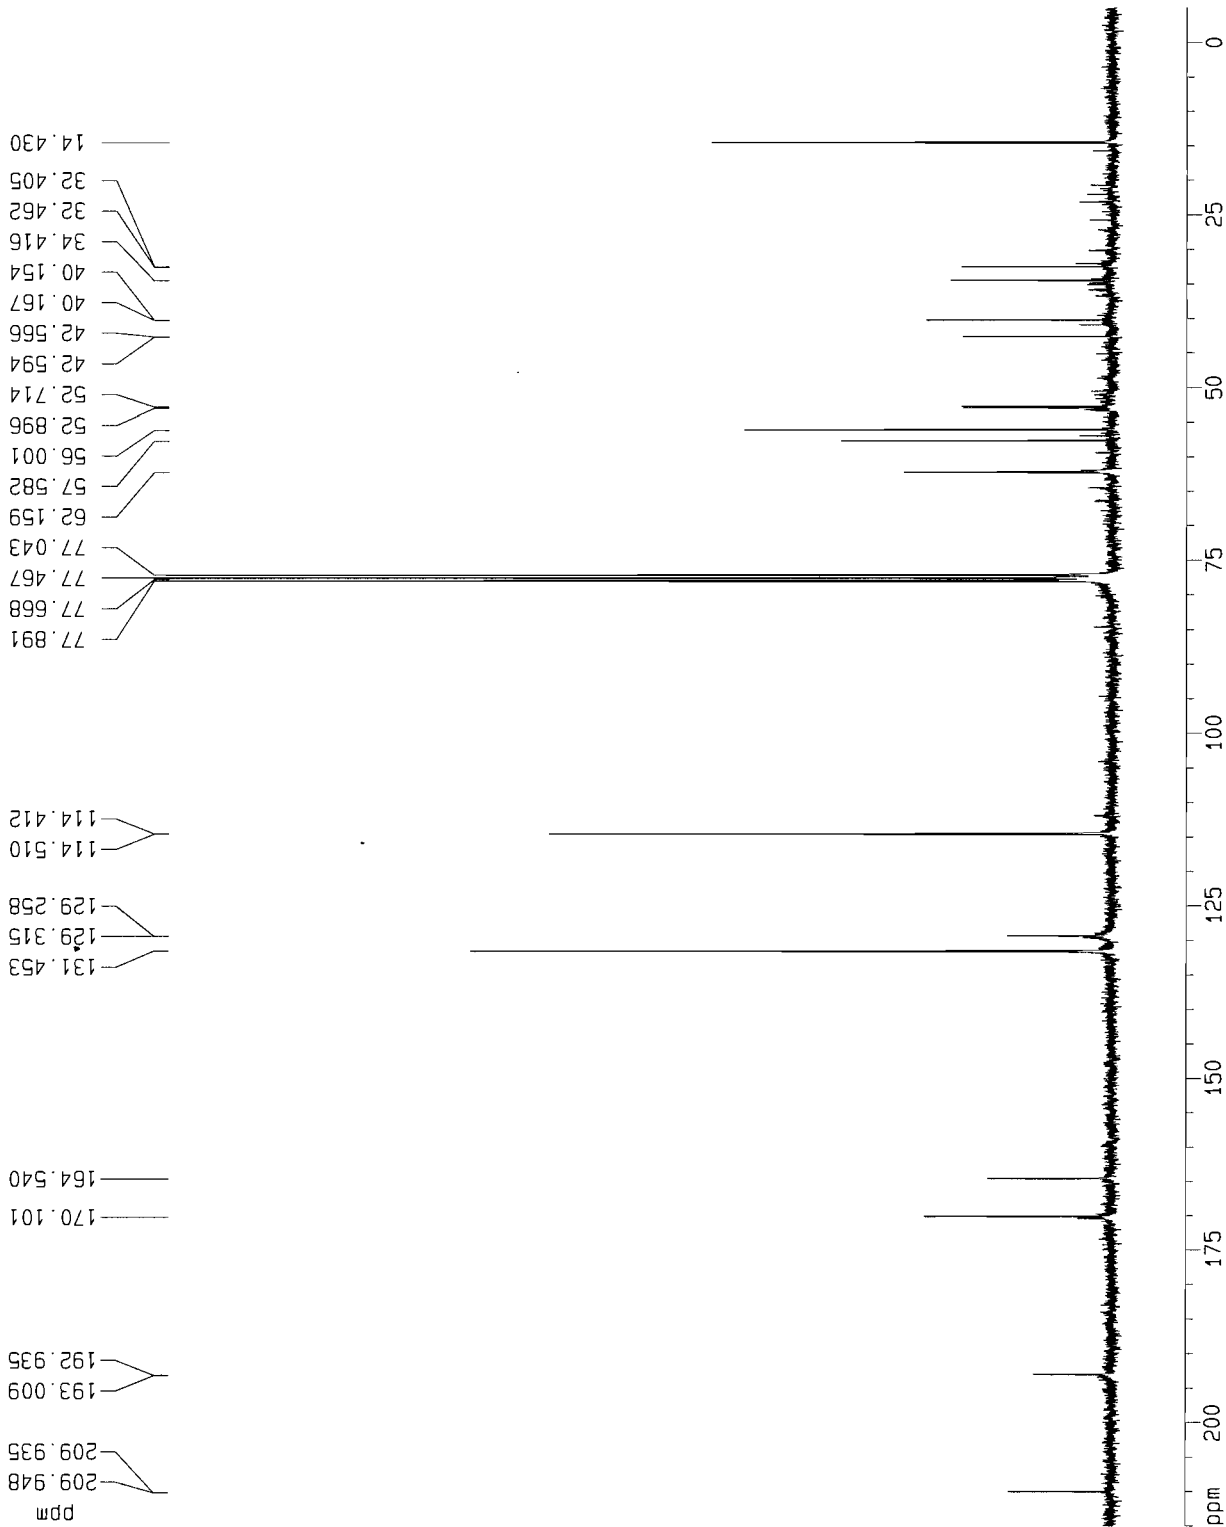

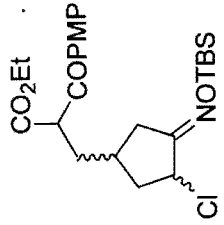

18c

Current Data Parameters  
 NAME Dct26-2007-wein  
 EXPNO 10  
 PROCNO 1

F2 - Acquisition Parameters  
 Date\_ 20071026  
 Time 11.08  
 INSTRUM spect  
 PROBHD 5 mm GNP 1H/1  
 PULPROG zg30  
 TD 65536  
 SOLVENT CDCl3  
 NS 16  
 DS 2  
 SWH 6172.839 Hz  
 FIDRES 0.094190 Hz  
 AQ 5.3084960 sec  
 RG 256  
 DM 81.000 usec  
 DE 6.00 usec  
 TE 300.0 K  
 Q1 1.00000000 sec

===== CHANNEL f1 =====  
 NUC1 1H  
 P1 11.70 usec  
 PL1 0.00 dB  
 SF01 299.8718518 MHz

F2 - Processing parameters  
 SI 32768  
 SF 299.8700549 MHz  
 WDW EM  
 SSB 0  
 LB 0.30 Hz  
 GB 0  
 PC 1.00

1D NMR plot parameters  
 CX 20.00 cm  
 F1P 11.000 ppm  
 F1 3298.57 Hz  
 F2P -1.000 ppm  
 F2 -299.87 Hz  
 PPMCM 0.60000 ppm/cm  
 HZCM 179.92203 Hz/cm

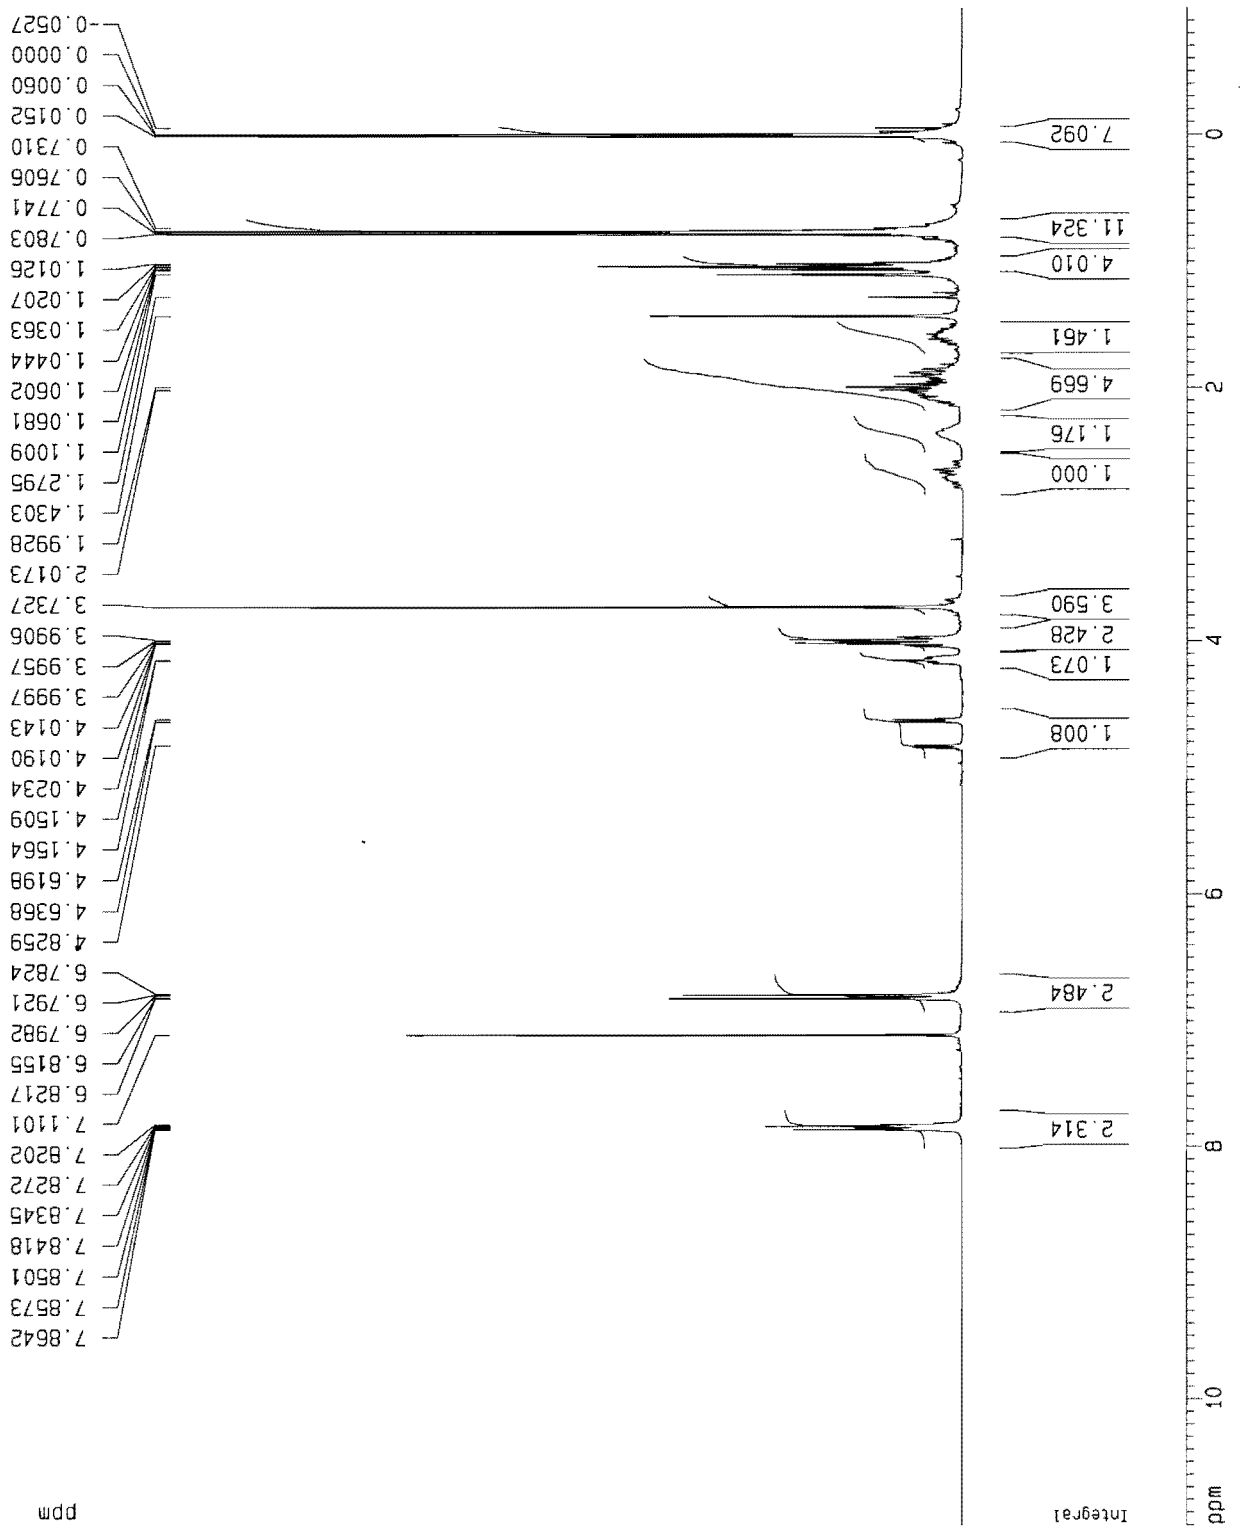

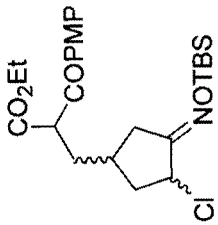

**18c**

Current Data Parameters  
 NAME Nov19-2007-Me1n  
 EXPNO 12  
 PROCNO 1

F2 - Acquisition Parameters

Date\_ 20071119  
 Time 17:51  
 INSTRUM spect  
 PROBD 5 mm Multinu  
 PULPROG zgpg30  
 TD 65536  
 SOLVENT CDCl3  
 NS 2602  
 DS 4  
 SWH 18632.393 Hz  
 FIDRES 0.287360 Hz  
 AQ 1.7400308 sec  
 RG 11585.2  
 DM 26.550 usec  
 DE 6.00 usec  
 TE 300.0 K  
 D1 2.00000000 sec  
 d11 0.03000000 sec  
 d12 0.00002000 sec

==== CHANNEL f1 =====

NUC1 13C  
 P1 11.80 usec  
 PL1 0.00 dB  
 SF01 75.4760200 MHz

==== CHANNEL f2 =====

CPDPRG2 waitz16  
 NUC2 1H  
 PCPD2 110.00 usec  
 PL2 0.00 dB  
 PL12 17.50 dB  
 PL13 17.50 dB  
 SF02 300.1312005 MHz

F2 - Processing parameters

SI 32768  
 SF 75.4677190 MHz  
 MDW EM  
 SS8 0  
 LB 1.00 Hz  
 GB 0  
 PC 1.40

1D NMR plot parameters

CX 20.00 cm  
 F1P 215.000 ppm  
 F1 16225.56 Hz  
 F2P -5.000 ppm  
 F2 -377.34 Hz  
 PPMCM 11.00000 ppm/cm  
 HZCM 830.14490 Hz/cm

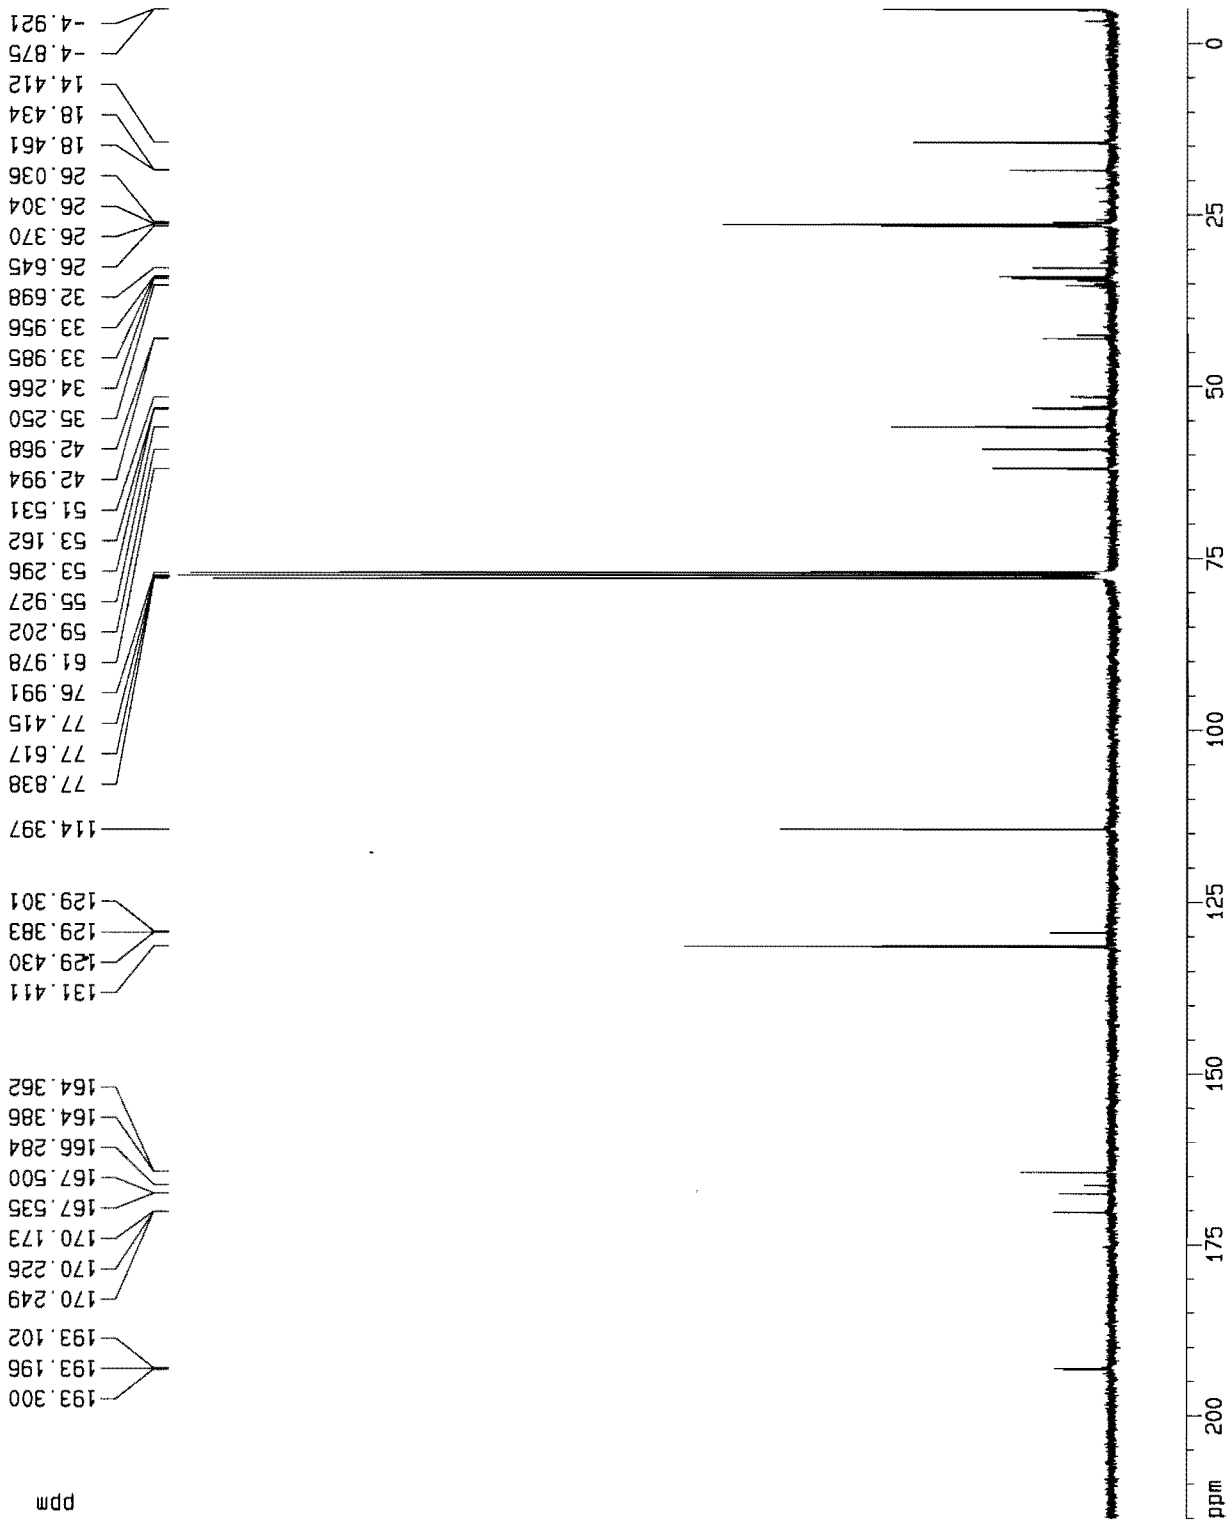

p-MeOPhOC<sub>2</sub>Et

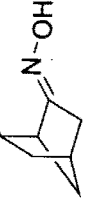

25

Current Data Parameters  
 NAME PKII-3B  
 EXPNO 1  
 PROCNO 1

F2 - Acquisition Parameters  
 Date\_ 20071029  
 Time 21.29  
 INSTRUM spect  
 PROBHD 5 mm BBI 1H-8  
 PULPROG zg30  
 TD 65536  
 SOLVENT CDCl3  
 NS 500  
 DS 2  
 SWH 8278.146 Hz  
 FIDRES 0.126314 Hz  
 AQ 3.9584243 sec  
 RG 512  
 DW 60.400 usec  
 DE 5.00 usec  
 TE 300.0 K  
 D1 1.00000000 sec

===== CHANNEL f1 =====  
 NUC1 1H  
 P1 6.45 usec  
 PL1 0.00 dB  
 SF01 400.1324710 MHz

F2 - Processing parameters  
 SI 32768  
 SF 400.1300000 MHz  
 WDW EM  
 SSB 0  
 LB 0.30 Hz  
 GB 0  
 PC 1.00

ID NMR plot parameters  
 CX 20.00 cm  
 F1P 11.000 ppm  
 F1 4401.43 Hz  
 F2P -1.000 ppm  
 F2 -400.13 Hz  
 PPMCM 0.50000 ppm/cm  
 HZCM 240.07800 Hz/cm

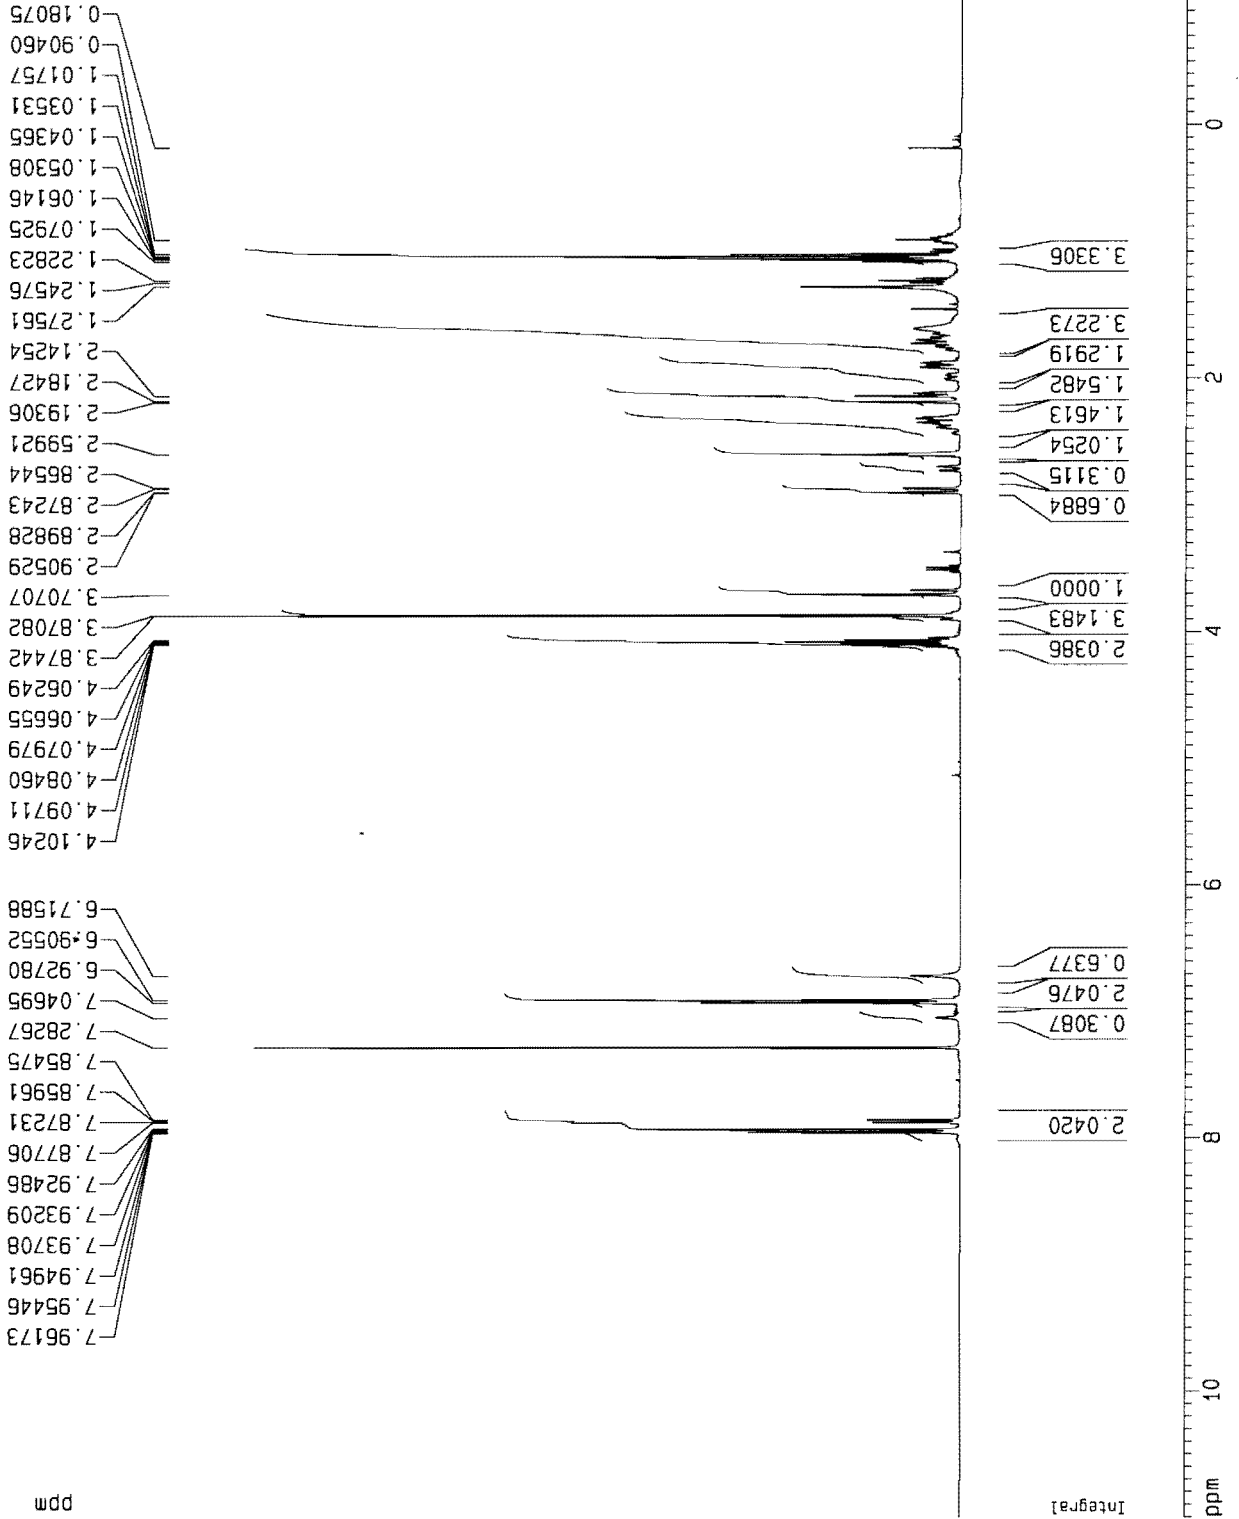

p-MeOPhOC<sub>2</sub>Et

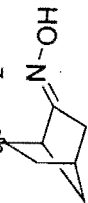

25

Current Data Parameters  
NAME Nov26-2007-wein  
EXPNO 12  
PROCNO 1

F2 - Acquisition Parameters

Date\_ 20071126  
Time 22.43  
INSTRUM spect  
PROBHD 5 mm QNP 1H/1  
PULPROG zgpg30  
TD 65536  
SOLVENT CDCl3  
NS 10744  
DS 4  
SWH 18795.992 Hz  
FIDRES 0.286819 Hz  
AQ 1.7433076 sec  
RG 2048  
DM 26.600 usec  
DE 6.00 usec  
TE 300.0 K  
D1 2.00000000 sec  
D11 0.03000000 sec  
D12 0.00002000 sec

==== CHANNEL f1 =====  
NUC1 13C  
P1 5.40 usec  
PL1 -6.00 dB  
SFO1 75.4106357 MHz

==== CHANNEL f2 =====  
CPDPRG2 waltz16  
NUC2 1H  
PCPD2 115.00 usec  
PL2 0.00 dB  
PL12 20.00 dB  
PL13 20.00 dB  
SFO2 299.8711995 MHz

F2 - Processing parameters  
SI 32768  
SF 75.4023410 MHz  
WDW EM  
SSR 0  
LB 1.00 Hz  
GB 0  
PC 1.40

10 NMR plot parameters  
CX 20.00 cm  
F1P 215.000 ppm  
F1 16211.50 Hz  
F2P -5.000 ppm  
F2 -377.01 Hz  
P1MCM 11.00000 ppm/cm  
HZCM 829.42578 Hz/cm

14.177  
14.281  
33.399  
34.035  
34.914  
36.152  
37.897  
38.761  
40.287  
40.523  
50.102  
50.596  
55.821  
55.885  
61.908  
62.484  
63.507  
64.133  
77.012  
77.435  
77.637  
77.859

114.206  
127.414  
129.295  
131.360  
131.608

162.828  
163.717  
163.856  
163.889  
172.383  
173.643

192.562  
193.452

ppm

0 25 50 75 100 125 150 175 200  
ppm

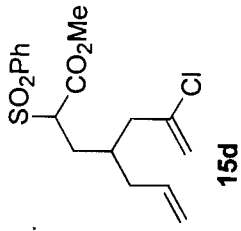

Current Data Parameters  
 NAME Jun25-2010-Me1n  
 EXPNO 10  
 PROCNO 1

F2 - Acquisition Parameters  
 Date\_ 20100625  
 Time 17.27  
 INSTRUM spect  
 PROBHD 5 mm GNP 1H/1  
 PULPROG zg30  
 TD 65536  
 SOLVENT CDC13  
 NS 16  
 DS 2  
 SWH 6172.839 Hz  
 FIDRES 0.094190 Hz  
 AQ 5.3084660 sec  
 RG 45.3  
 DW 81.000 usec  
 DE 6.00 usec  
 TE 300.0 K  
 D1 1.0000000 sec

===== CHANNEL f1 =====  
 NUC1 1H  
 P1 11.70 usec  
 PL1 0.00 dB  
 SF01 299.8718518 MHz

F2 - Processing parameters  
 SI 32768  
 SF 299.8700000 MHz  
 WDW EM  
 SSB 0  
 LB 0.30 Hz  
 GB 0  
 PC 1.00

1D NMR plot parameters  
 CX 20.00 cm  
 F1P 11.000 ppm  
 F1 3298.57 Hz  
 F2P -1.000 ppm  
 F2 -299.87 Hz  
 PPMCH 0.60000 ppm/cm  
 HZCM 179.92200 Hz/cm

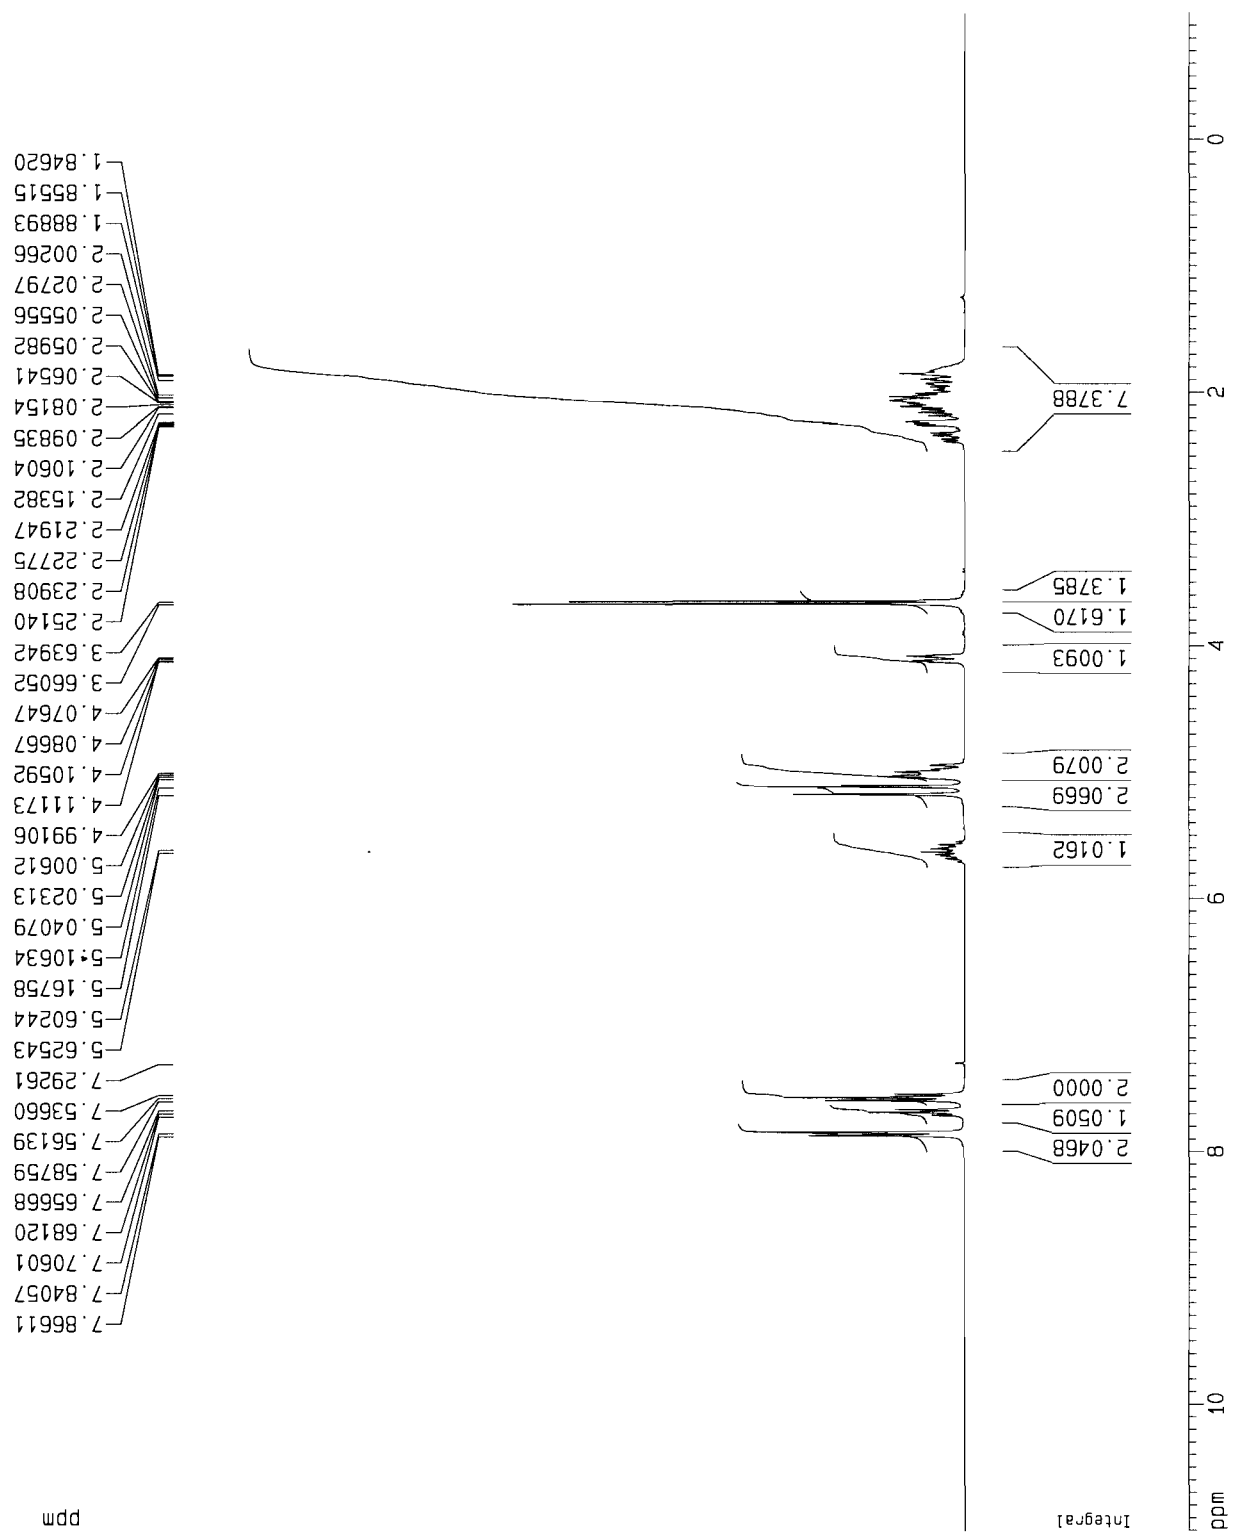



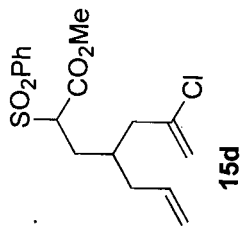

Current Data Parameters  
 NAME Jun25-2010-Me1n  
 EXPNO 11  
 PROCNO 1

F2 - Acquisition Parameters  
 Date\_ 20100625  
 Time 17.35  
 INSTRUM spect  
 PROBHD 5 mm QNP 1H/1  
 PULPROG zgpg30  
 TD 65536  
 SOLVENT CDC13  
 NS 74  
 DS 4  
 SWH 18796.992 Hz  
 FIDRES 0.286819 Hz  
 AQ 1.743076 sec  
 RG 1024  
 DM 26.600 usec  
 DE 6.00 usec  
 TE 300.0 K  
 D1 2.00000000 sec  
 D11 0.03000000 sec  
 D12 0.00002000 sec

===== CHANNEL f1 =====  
 NUC1 13C  
 P1 5.40 usec  
 PL1 -6.00 dB  
 SF01 75.4106357 MHz

===== CHANNEL f2 =====  
 CPDPRG2 waltz16  
 NUC2 1H  
 PCPD2 115.00 usec  
 PL2 0.00 dB  
 PL12 20.00 dB  
 PL13 20.00 dB  
 SF02 299.8711995 MHz

F2 - Processing parameters  
 S1 32768  
 SF 75.4024598 MHz  
 WDW EM  
 SSB 0  
 LB 1.00 Hz  
 GB 0  
 PC 1.40

1D NMR plot parameters  
 CX 20.00 cm  
 F1P 215.000 ppm  
 F1 16211.53 Hz  
 F2P -5.000 ppm  
 F2 -377.01 Hz  
 PPMCM 11.00000 ppm/cm  
 HZCM 829.42706 Hz/cm

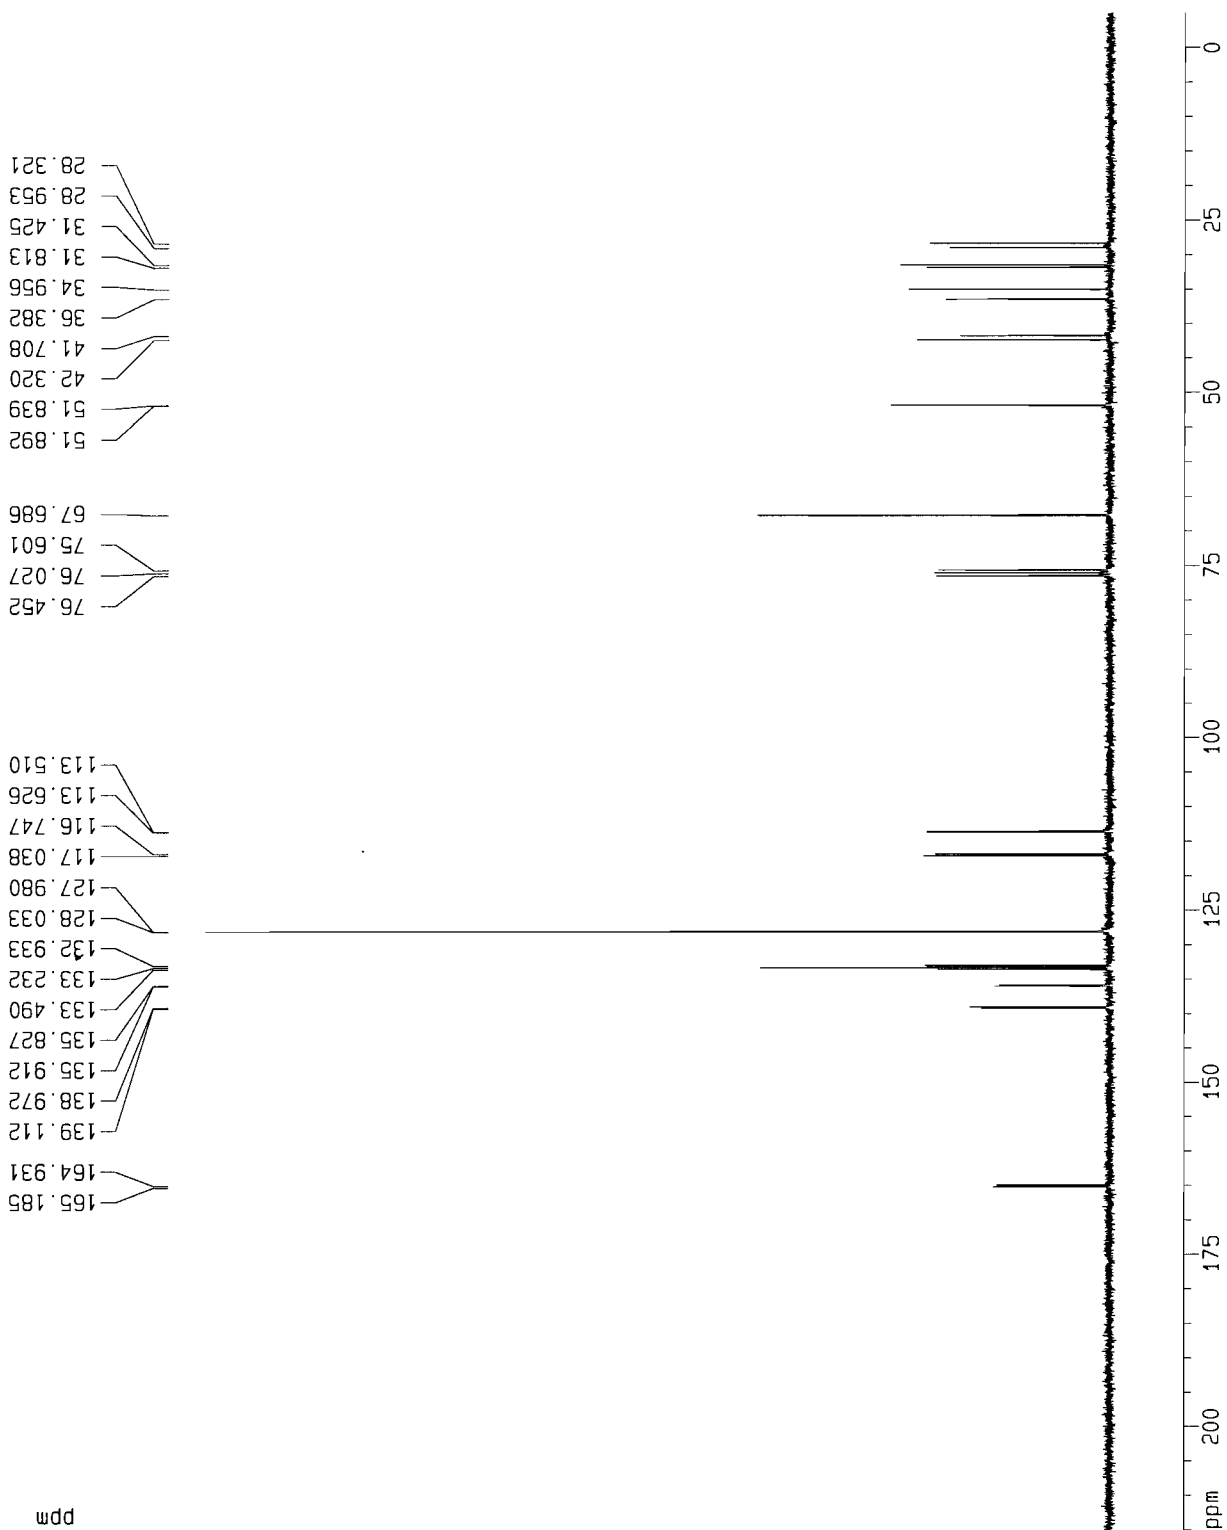

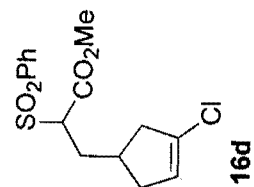

Current Data Parameters  
 NAME Oct16-2010-Me1n  
 EXPNO 20  
 PROCNO 1

F2 - Acquisition Parameters  
 Date\_ 20101016  
 Time 17.35  
 INSTRUM spect  
 PROBHD 5 mm QNP 1H/1  
 PULPROG zg30  
 TO 65536  
 SOLVENT CDCl3  
 NS 16  
 DS 2  
 SWH 6172.839 Hz  
 FIDRES 0.094190 Hz  
 AQ 5.3084660 sec  
 RG 456.1  
 DW 81.000 usec  
 DE 6.00 usec  
 TE 300.0 K  
 D1 1.00000000 sec

===== CHANNEL f1 =====  
 NUC1 1H  
 P1 11.70 usec  
 PL1 0.00 dB  
 SF01 299.8718518 MHz

F2 - Processing parameters  
 SI 32768  
 SF 299.8700099 MHz  
 AQCW EM  
 SSB 0  
 LB 0.30 Hz  
 GB 0  
 PC 1.00

10 NMR plot parameters  
 CX 20.00 cm  
 F1P 11.000 ppm  
 F1 3298.57 Hz  
 F2P -1.000 ppm  
 F2 -299.87 Hz  
 PPMCM 0.60000 ppm/cm  
 HZCM 179.92200 Hz/cm

7.88583  
7.86014  
7.72938  
7.71151  
7.70476  
7.69814  
7.68384  
7.67987  
7.61104  
7.58466  
7.56541  
7.56033  
7.26020  
5.57682  
5.56484  
5.55967  
5.55186  
3.97457  
3.96255  
3.95026  
3.94501  
3.93707  
3.92538  
3.91319  
3.66618  
3.66219  
3.62682  
3.59659  
2.55207  
2.54809  
2.35375  
2.22259  
2.21500  
2.20735  
2.15930  
2.15567  
2.13409  
2.10964  
2.04268  
1.57366  
1.25482

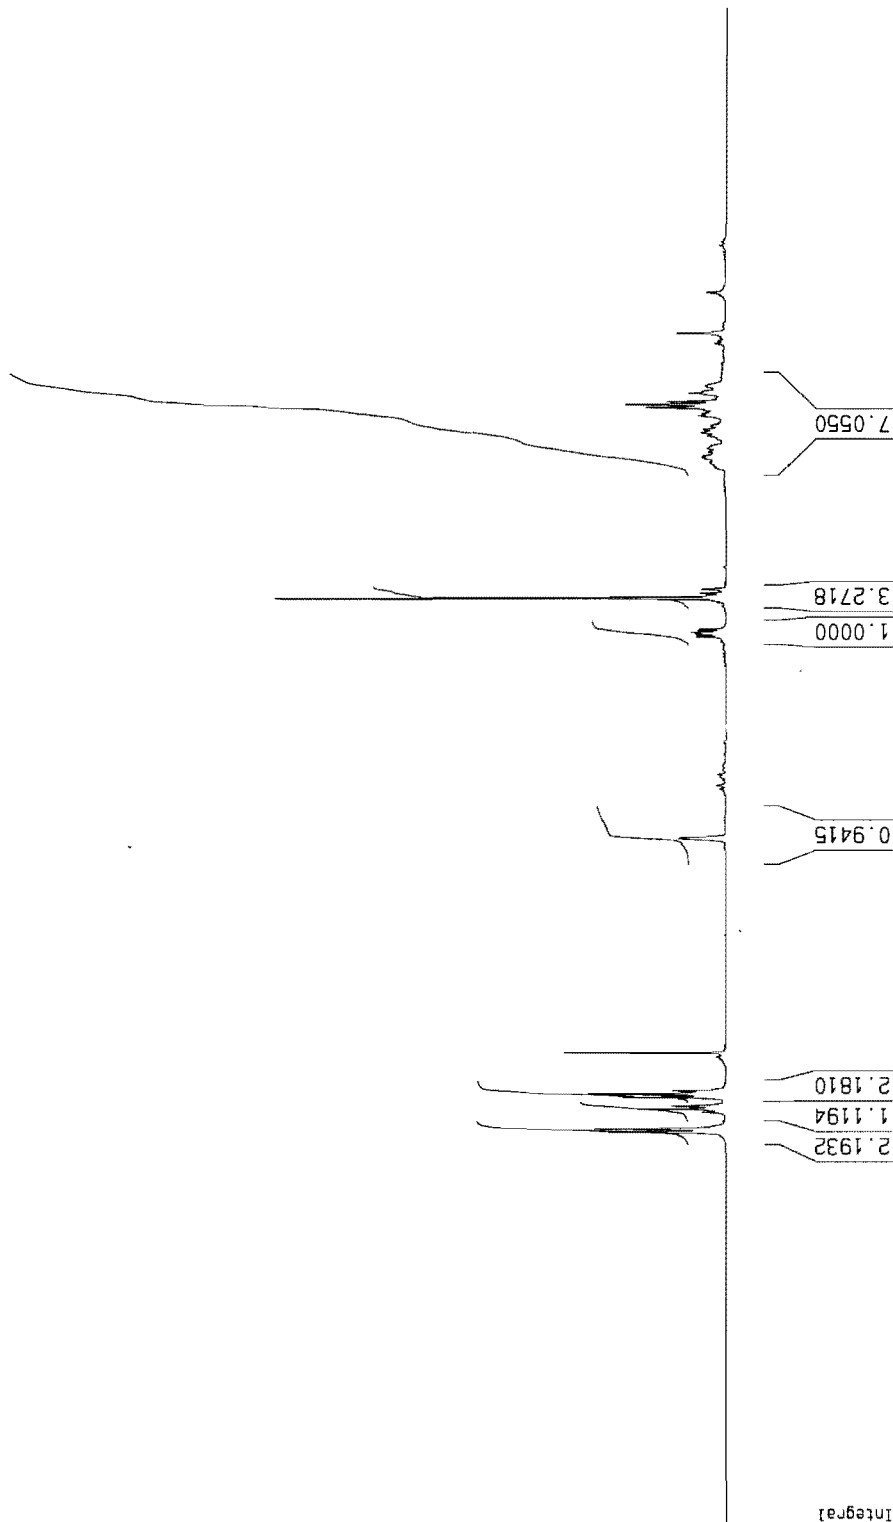

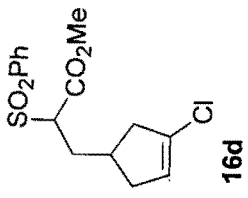

Current Data Parameters  
 NAME Oct16-2010-wejn  
 EXPNO 22  
 PROCNO 1

F2 - Acquisition Parameters  
 Date\_ 20101016  
 Time\_ 18.36  
 INSTRUM spect  
 PROBHD 5 mm QNP 1H/1  
 PULPROG zgpg30  
 TO 65536  
 SOLVENT CDCl3  
 NS 1760  
 DS 4  
 SWH 18796.992 Hz  
 FIDRES 0.286819 Hz  
 AQ 1.7433076 sec  
 RG 1024  
 DM 26.600 usec  
 DE 6.00 usec  
 TE 300.0 K  
 D1 2.00000000 sec  
 D11 0.03000000 sec  
 D12 0.00002000 sec

===== CHANNEL f1 =====  
 NUC1 13C  
 P1 5.40 usec  
 PL1 -6.00 dB  
 SFO1 75.4106357 MHz

===== CHANNEL f2 =====  
 CPDPRG2 waltz16  
 NUC2 1H  
 PCPD2 115.00 usec  
 PL2 0.00 dB  
 PL12 20.00 dB  
 PL13 20.00 dB  
 SFO2 299.8711995 MHz

F2 - Processing parameters  
 SI 32768  
 SF 75.4023707 MHz  
 WDW EM  
 SSB 0  
 LB 1.00 Hz  
 GB 0  
 PC 1.40

1D NMR plot parameters  
 CX 20.00 cm  
 F1P 215.000 ppm  
 F1 16211.51 Hz  
 F2P -5.000 ppm  
 F2 -377.01 Hz  
 PPMCM 11.00000 ppm/cm  
 HZCM 829.42615 Hz/cm

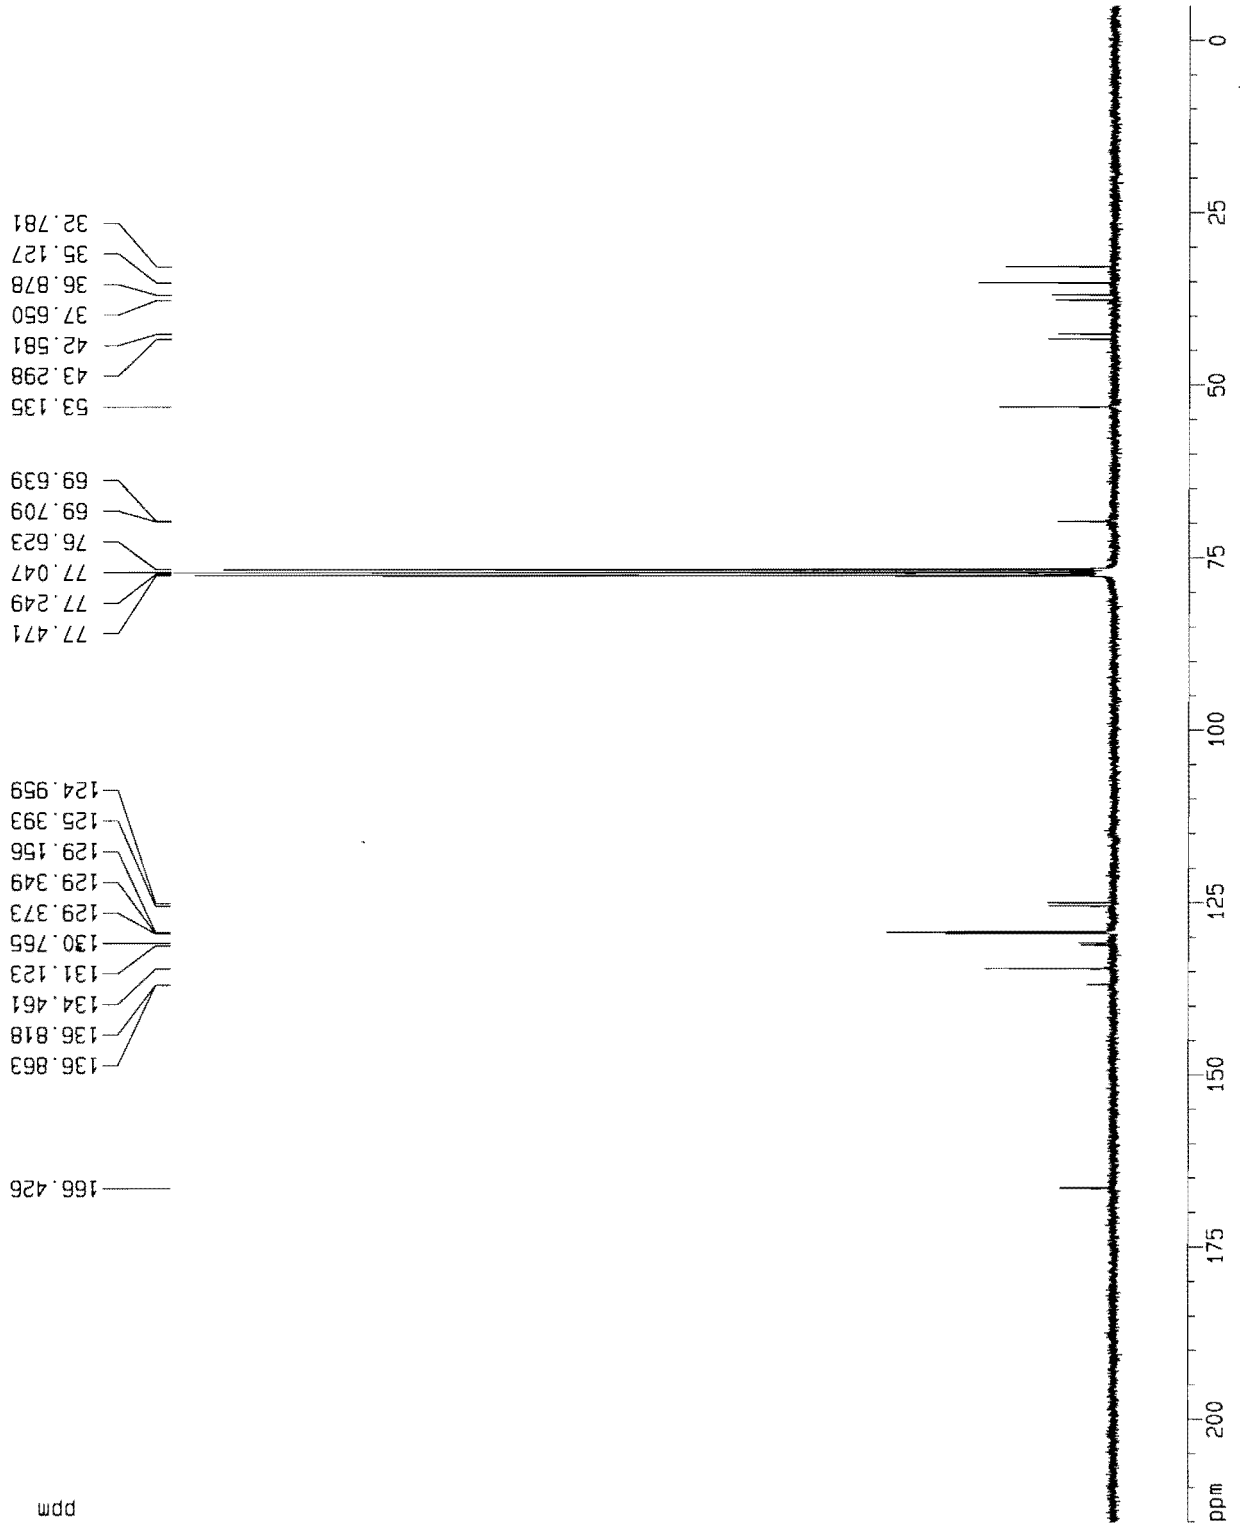

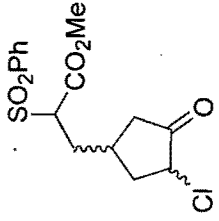

Current Data Parameters  
 NAME Jun30-2010-We.in  
 EXPNO 30  
 PROCNO 1

F2 - Acquisition Parameters  
 Date\_ 20100630  
 Time 17.31  
 INSTRUM spect  
 PROBHD 5 mm QNP 1H/1  
 PULPROG zg30  
 TO 65536  
 SOLVENT CDCl3  
 NS 16  
 DS 2  
 SWH 6172.839 Hz  
 FIDRES 0.094190 Hz  
 AQ 5.3084660 sec  
 RG 362  
 DW 81.000 usec  
 DE 6.00 usec  
 TE 300.0 K  
 D1 1.00000000 sec

===== CHANNEL f1 =====  
 NUC1 1H  
 P1 11.70 usec  
 PL1 0.00 dB  
 SF01 299.8718515 MHz

F2 - Processing parameters  
 SI 32768  
 SF 299.8700299 MHz  
 WDW EM  
 SSB 0  
 LB 0.30 Hz  
 GB 0  
 PC 1.00

1D NMR plot parameters  
 CX 20.00 cm  
 F1P 11.000 ppm  
 F1 3298.57 Hz  
 F2P -1.000 ppm  
 F2 -299.87 Hz  
 PPMCM 0.60000 ppm/cm  
 HZCM 179.92201 Hz/cm

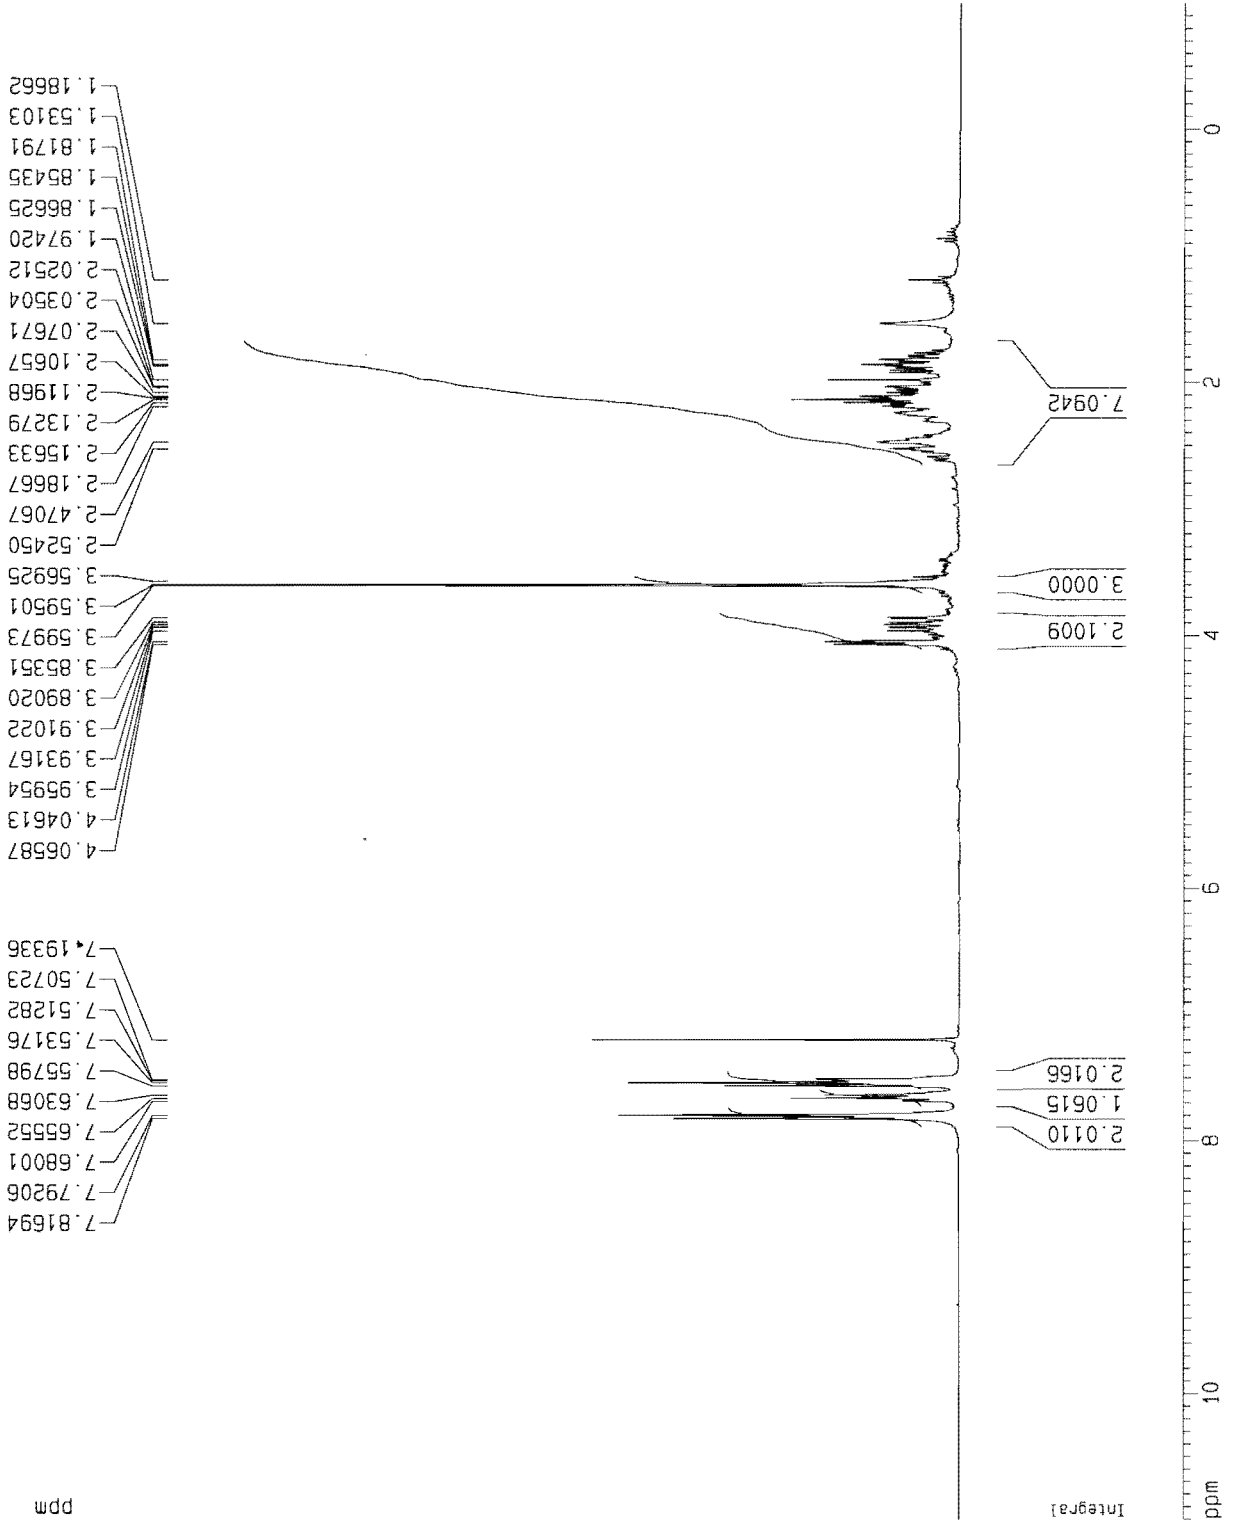

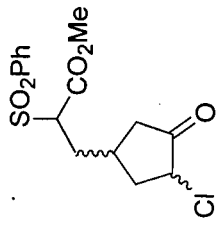

Current Data Parameters  
 NAME Jun30-2010-Mein  
 EXPNO 30  
 PROCNO 1

F2 - Acquisition Parameters  
 Date\_ 20100630  
 Time 19.14  
 INSTRUM spect  
 PROBHD 5 mm Multinu  
 PULPROG zgpg30  
 TD 65536  
 SOLVENT CDC13  
 NS 13525  
 DS 4  
 SWH 18832.393 Hz  
 FIDRES 0.287360 Hz  
 AQ 1.7400308 sec  
 RG 11585.2  
 DW 26.550 usec  
 DE 6.00 usec  
 TE 300.0 K  
 D1 2.00000000 sec  
 d11 0.03000000 sec  
 d12 0.00002000 sec

===== CHANNEL f1 =====  
 NUC1 13C  
 P1 11.80 usec  
 PL1 0.00 dB  
 SF01 75.4760200 MHz

===== CHANNEL f2 =====  
 CPDPRG2 waltz16  
 NUC2 1H  
 PCPD2 110.00 usec  
 PL2 0.00 dB  
 PL12 17.50 dB  
 PL13 17.50 dB  
 SF02 300.1312005 MHz

F2 - Processing parameters  
 SI 32768  
 SF 75.4677190 MHz  
 HDW EM  
 SSB 0  
 LB 1.00 Hz  
 GB 0  
 PC 1.40

1D NMR plot parameters  
 CX 20.00 cm  
 F1P 215.000 ppm  
 F1 16225.56 Hz  
 F2P -5.000 ppm  
 F2 -377.34 Hz  
 PPMCM 11.00000 ppm/cm  
 HZCM 830.14490 Hz/cm

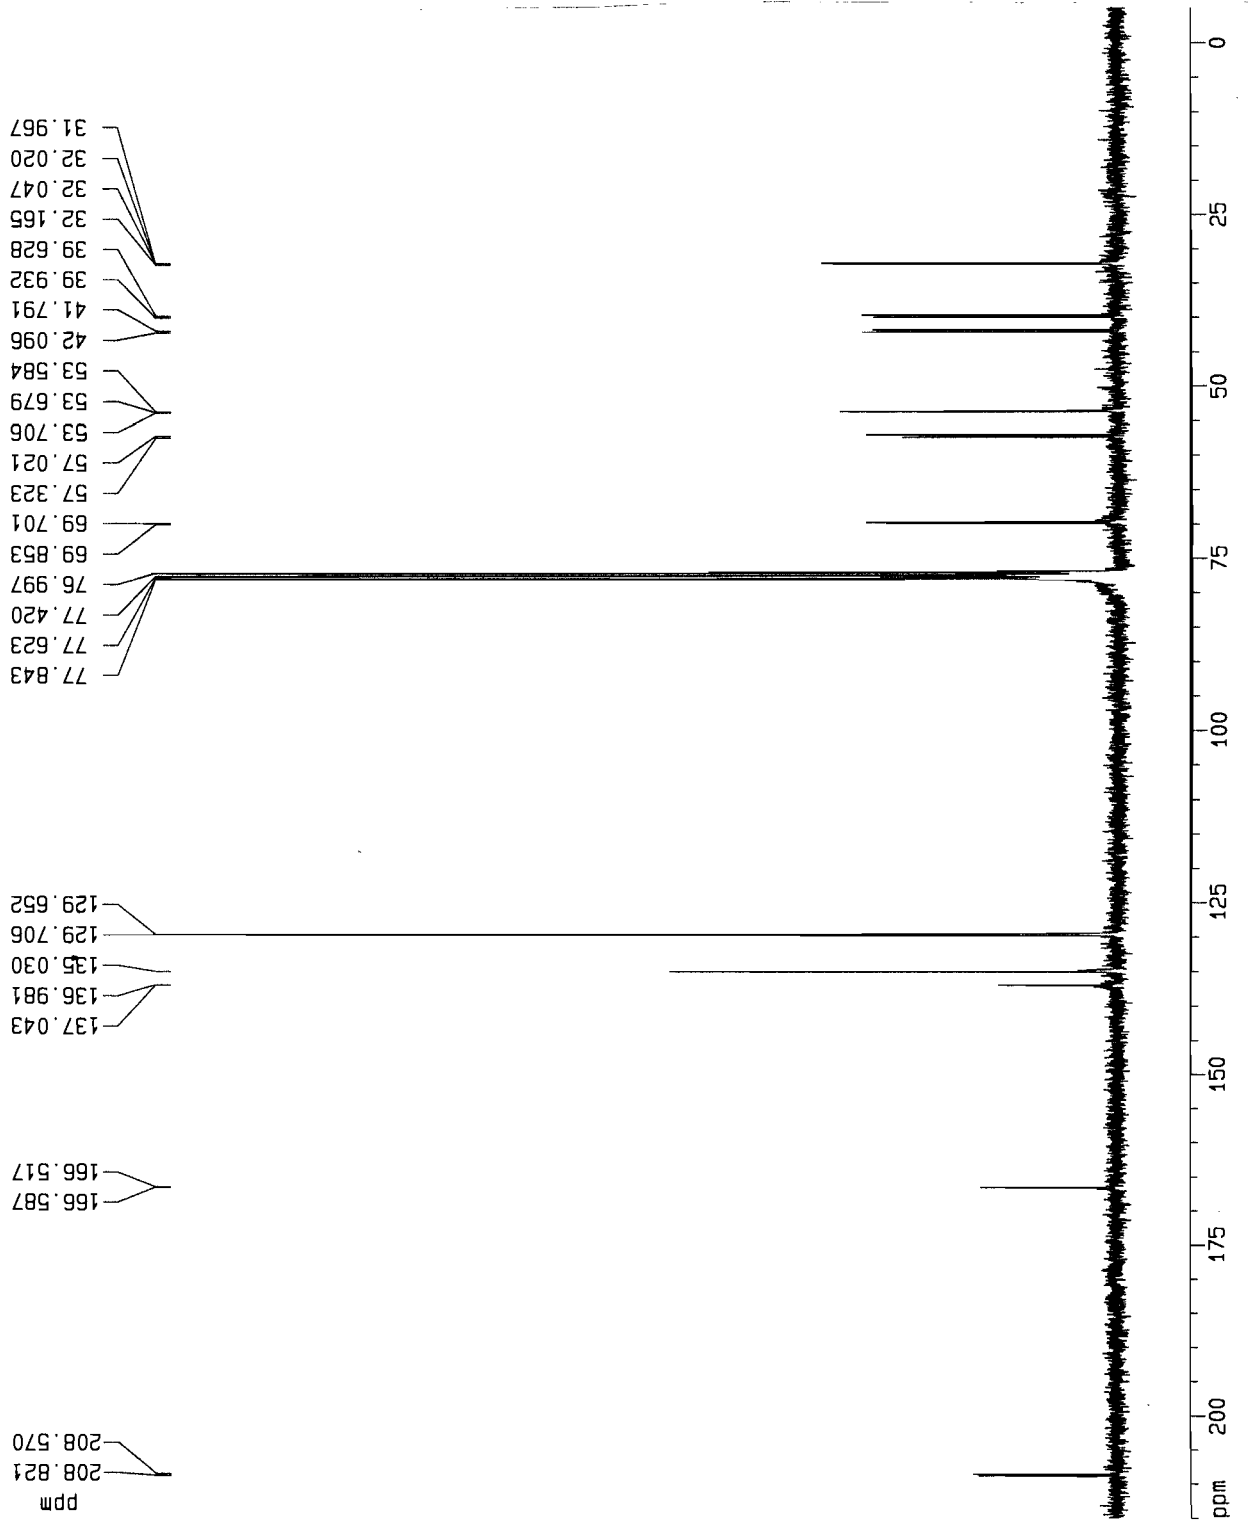

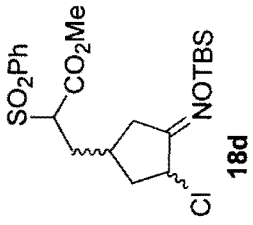

Current Data Parameters  
 NAME Jui02-2010-Wein  
 EXPNO 10  
 PROCNO 1

F2 - Acquisition Parameters  
 Date\_ 20100702  
 Time 16:59  
 INSTRUM spect  
 PROBD 5 mm QNP 1H/1  
 PULPROG zg30  
 TD 65536  
 SOLVENT CDCl3  
 NS 16  
 DS 2  
 SWH 6172.839 Hz  
 FIDRES 0.094190 Hz  
 AQ 5.3084660 sec  
 RG 287.4  
 DW 81.000 usec  
 DE 6.00 usec  
 TE 300.0 K  
 O1 1.00000000 sec

\*\*\*\*\* CHANNEL f1 \*\*\*\*\*  
 NUC1 1H  
 P1 11.70 usec  
 PL1 0.00 dB  
 SF01 299.8718518 MHz

F2 - Processing parameters  
 SI 32768  
 SF 299.8700542 MHz  
 WDW EM  
 SSB 0  
 LB 0.30 Hz  
 GB 0  
 PC 1.00

1D NMR plot parameters  
 CX 20.00 cm  
 F1P 11.000 ppm  
 F1 3298.57 Hz  
 F2P -1.000 ppm  
 F2 -299.87 Hz  
 PPMCM 0.60000 ppm/cm  
 HZCM 179.92203 Hz/cm

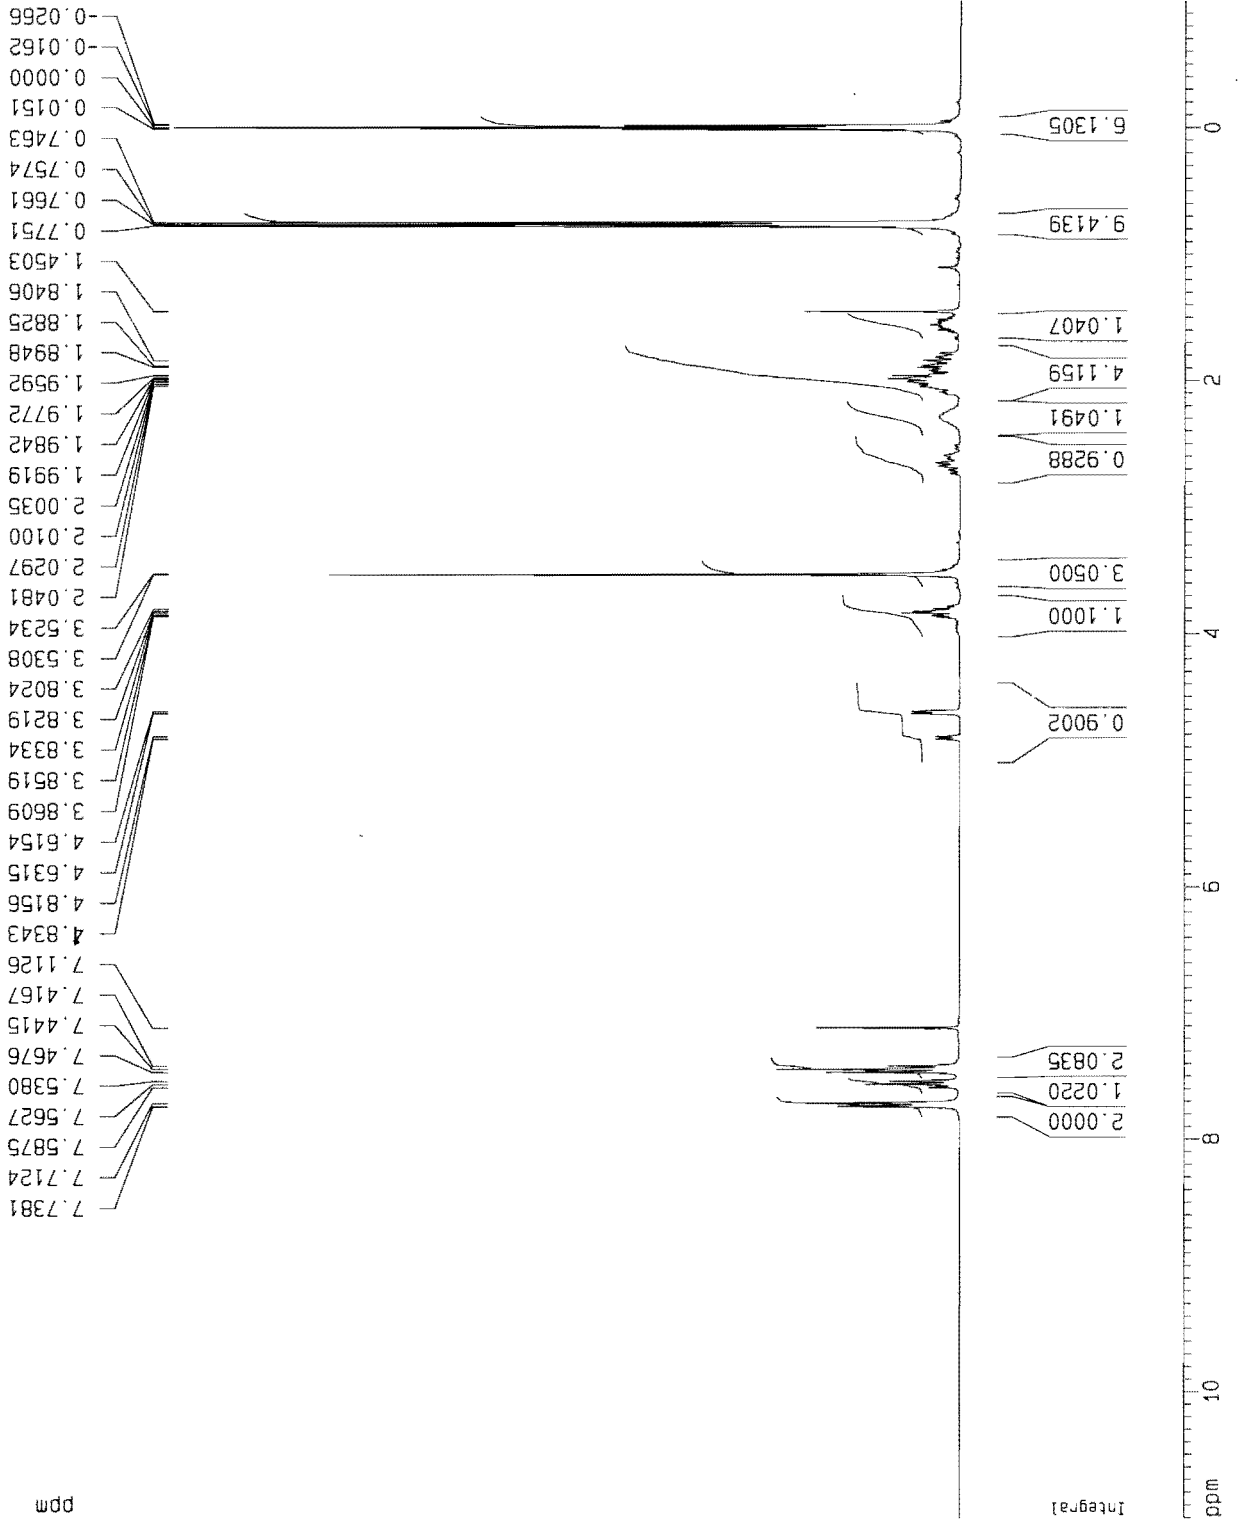

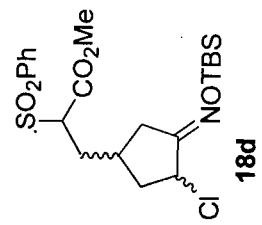

Current Data Parameters  
 NAME Ju102-2010-wejn  
 EXPNO 12  
 PROCNO 1

F2 - Acquisition Parameters  
 Date\_ 20100702  
 Time\_ 17.49  
 INSTRUM spect  
 PROBHD 5 mm QNP 1H/1  
 PULPROG zgpg30  
 TD 65536  
 SOLVENT CDCl3  
 NS 1024  
 DS 4  
 SWH 18796.992 Hz  
 FIDRES 0.286819 Hz  
 AQ 1.7433076 sec  
 RG 8192  
 DW 26.600 usec  
 DE 6.00 usec  
 TE 300.0 K  
 D1 2.00000000 sec  
 D11 0.03000000 sec  
 D12 0.00002000 sec

===== CHANNEL f1 =====  
 NUC1 13C  
 P1 5.40 usec  
 PL1 -6.00 dB  
 SFO1 75.4106357 MHz

===== CHANNEL f2 =====  
 CPDPRG2 waltz16  
 NUC2 1H  
 PCPD2 115.00 usec  
 PL2 0.00 dB  
 PL12 20.00 dB  
 PL13 20.00 dB  
 SFO2 299.8711995 MHz

F2 - Processing parameters  
 SI 32768  
 SF 75.4024435 MHz  
 WDW EM  
 SSB 0  
 LB 1.00 Hz  
 GB 0  
 PC 1.40

1D NMR plot parameters  
 CX 20.00 cm  
 F1P 215.000 ppm  
 F1 16211.52 Hz  
 F2P -10.000 ppm  
 F2 -754.03 Hz  
 PPMCM 11.25000 ppm/cm  
 HZCM 848.27147 Hz/cm

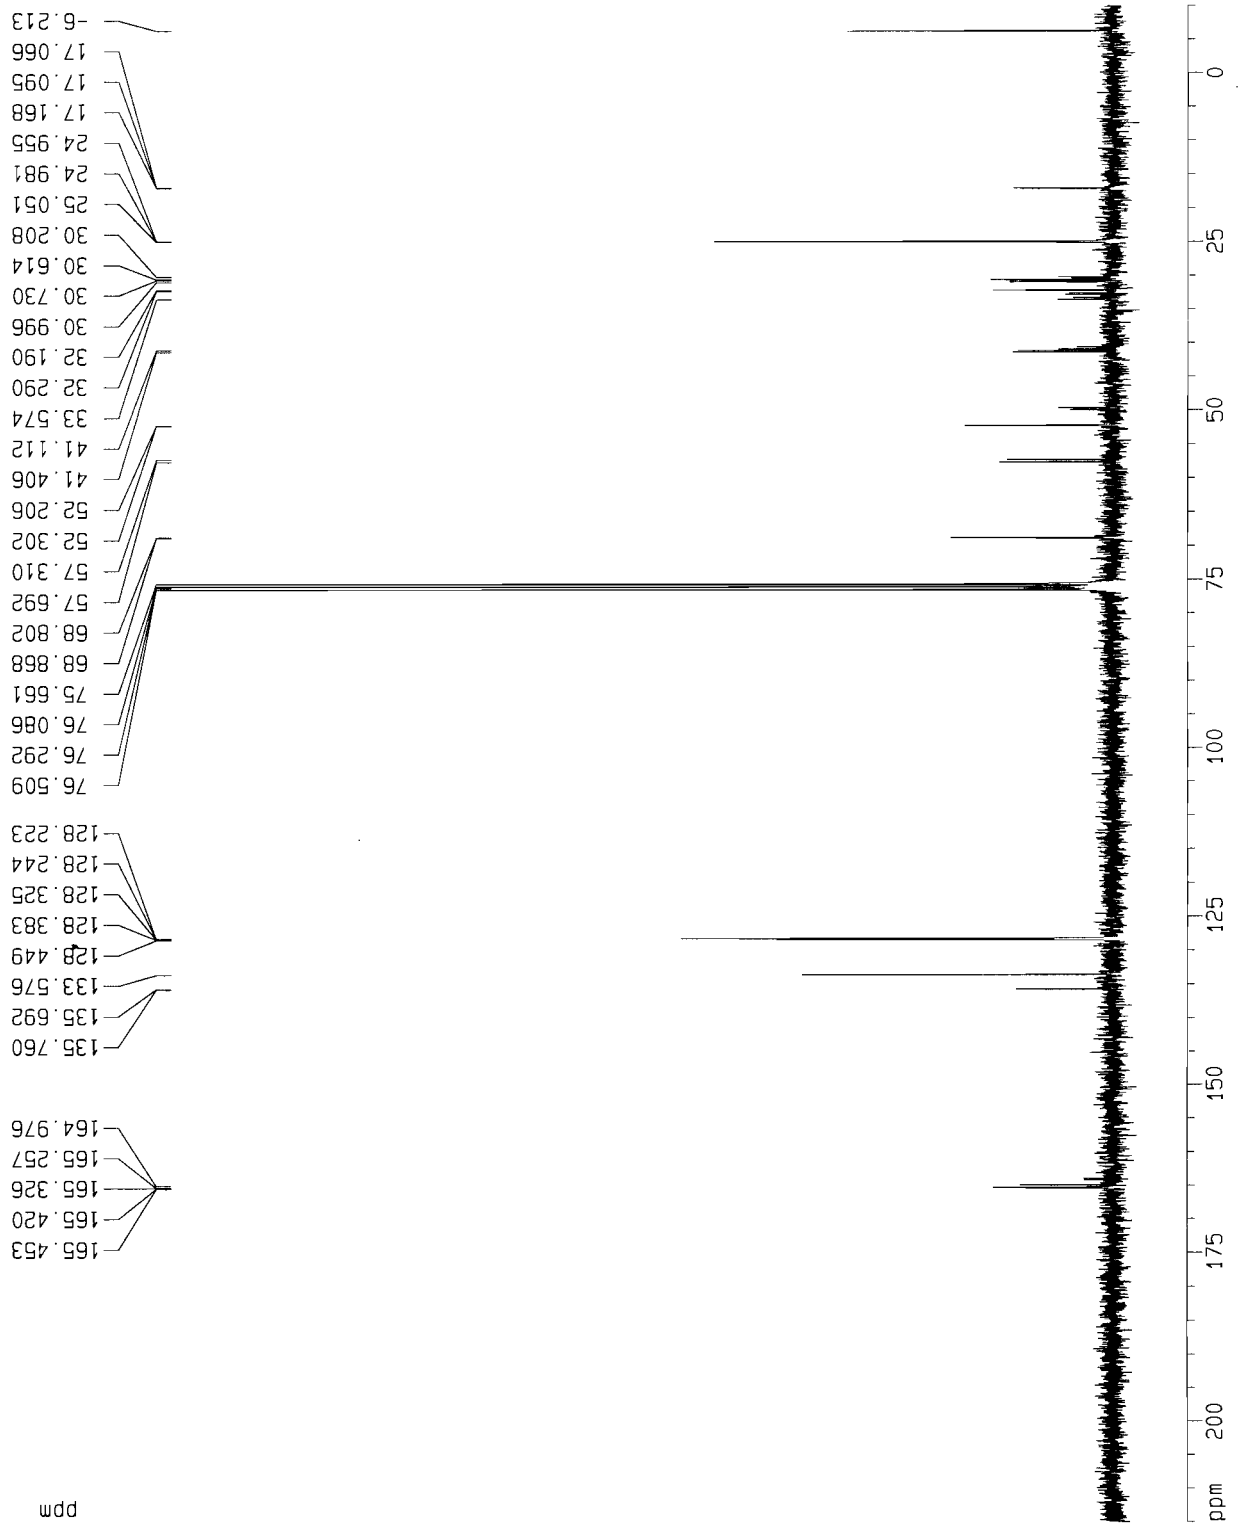

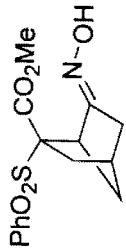

22a

Current Data Parameters  
 NAME Jul05-2010-Wein  
 EXPNO 10  
 PROCNO 1

F2 - Acquisition Parameters  
 Date\_ 20100705  
 Time 18.00  
 INSTRUM spect  
 PROBHD 5 mm QNP 1H/1  
 PULPROG zg30  
 TD 65536  
 SOLVENT CDCl3  
 NS 16  
 DS 2  
 SWH 6172.839 Hz  
 FIDRES 0.094190 Hz  
 AQ 5.3084660 sec  
 RG 256  
 DM B1.000 usec  
 DE 6.00 usec  
 TE 300.0 K  
 D1 1.00000000 sec

==== CHANNEL f1 =====  
 NUC1 1H  
 P1 11.70 usec  
 PL1 0.00 dB  
 SFO1 299.8718518 MHz

F2 - Processing parameters  
 SI 32768  
 SF 299.8700431 MHz  
 WDW EM  
 SSB 0  
 LB 0.30 Hz  
 GB 0  
 PC 1.00

1D NMR plot parameters  
 CX 20.00 cm  
 F1P 11.000 ppm  
 F1 3298.57 Hz  
 F2P -1.000 ppm  
 F2 -299.87 Hz  
 PPMCM 0.60000 ppm/cm  
 HZCM 179.92203 Hz/cm

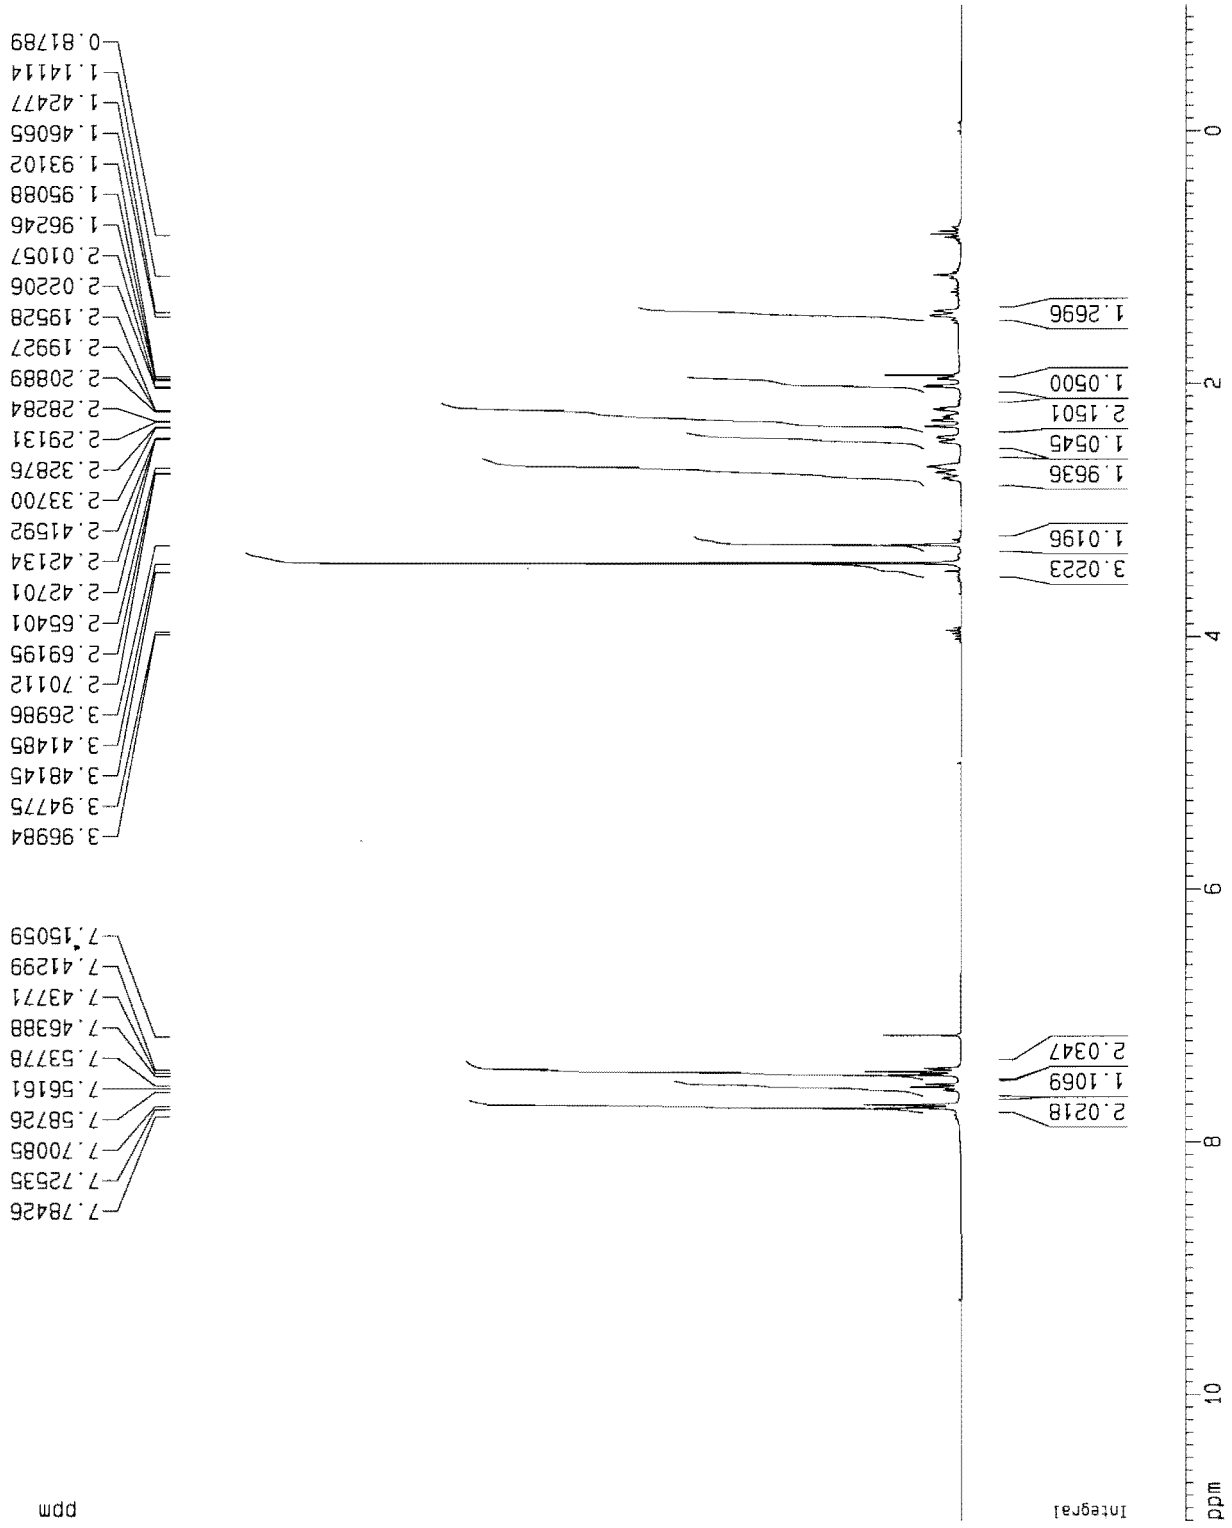



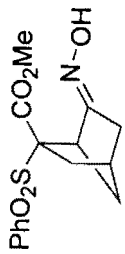

22a

Current Data Parameters  
 NAME Ju105-2010-Wein  
 EXPNO 12  
 PROCNO 1

F2 - Acquisition Parameters  
 Date\_ 20100705  
 Time 19.00  
 INSTRUM spect  
 PROBHD 5 mm GNP 1H/1  
 PULPROG zgpg30  
 TD 65536  
 SOLVENT CDCl<sub>3</sub>  
 NS 1621  
 DS 4  
 SWH 18796.992 Hz  
 FIDRES 0.286819 Hz  
 AQ 1.7433076 sec  
 RG 512  
 DW 26.600 USEC  
 DE 6.00 USEC  
 TE 300.0 K  
 D1 2.00000000 sec  
 D11 0.03000000 sec  
 D12 0.0002000 sec

===== CHANNEL f1 =====  
 NUC1 13C  
 P1 5.40 USEC  
 PL1 -6.00 dB  
 SF01 75.4106357 MHz

===== CHANNEL f2 =====  
 CPDPRG2 waltz16  
 NUC2 1H  
 PCPD2 115.00 USEC  
 PL2 0.00 dB  
 PL12 20.00 dB  
 PL13 20.00 dB  
 SF02 299.8711995 MHz

F2 - Processing parameters  
 SI 32768  
 SF 75.4023410 MHz  
 WDW EM  
 SSB 0  
 LB 1.00 Hz  
 GB 0  
 PC 1.40

10 NMR plot parameters  
 CX 20.00 cm  
 F1P 215.000 ppm  
 F1 16211.50 Hz  
 F2P -5.000 ppm  
 F2 -377.01 Hz  
 PPMCM 11.00000 ppm/cm  
 HZCM 829.42578 Hz/cm

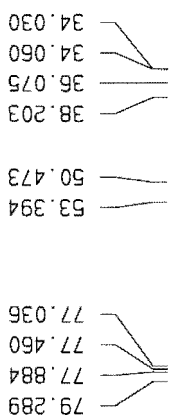

ppm

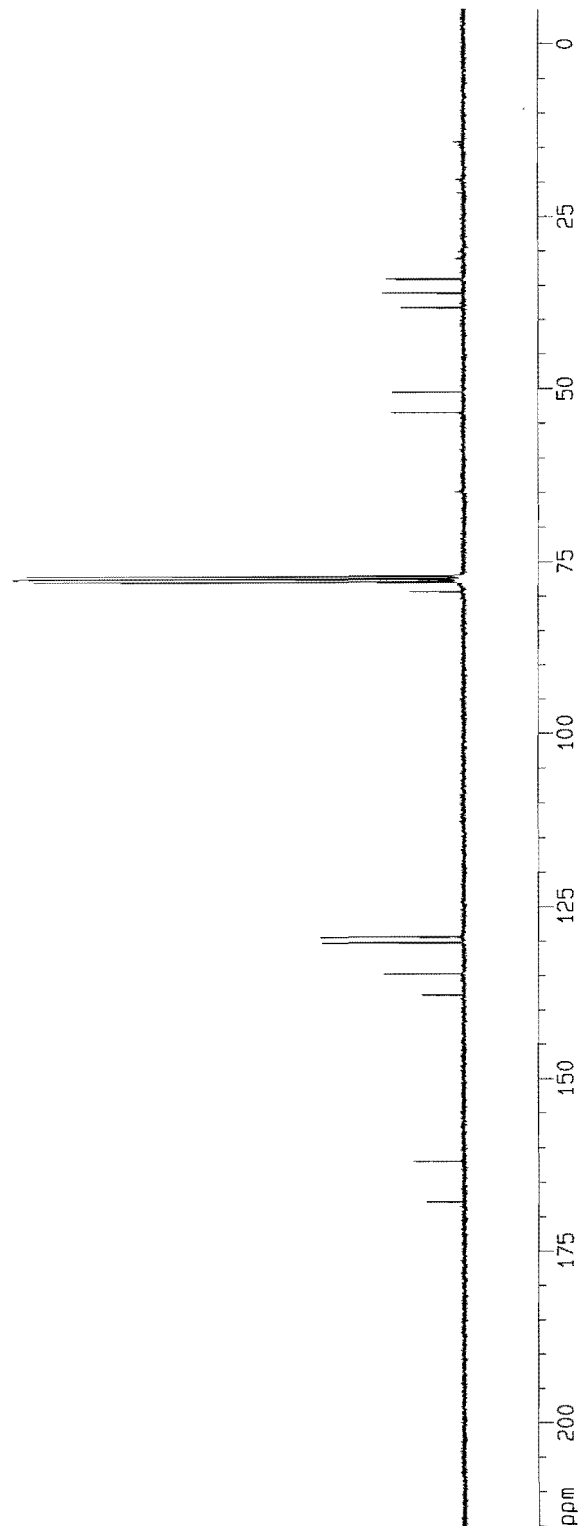

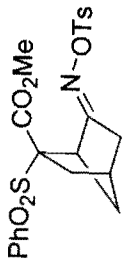

22b

NAME Nov23-2010-Wein  
 EXPNO 10  
 PROCNO 1

F2 - Acquisition Parameters  
 Date\_ 20101123  
 Time 15.20  
 INSTRUM spect  
 PROBHD 5 mm Multinu  
 PULPROG zg30  
 TD 65536  
 SOLVENT CDCl<sub>3</sub>  
 NS 16  
 DS 2  
 SWH 6172.839 Hz  
 FIDRES 0.094190 Hz  
 AQ 5.3084660 sec  
 RG 512  
 DW 81.000 usec  
 DE 6.00 usec  
 TE 300.0 K  
 D1 1.00000000 sec

===== CHANNEL f1 =====  
 NUC1 1H  
 P1 9.60 usec  
 PL1 -6.00 dB  
 SF01 300.1318534 MHz

F2 - Processing parameters  
 SI 32768  
 SF 300.1300263 MHz  
 WDW EM  
 SSB 0  
 LB 0.30 Hz  
 GB 0  
 PC 1.00

1D NMR plot parameters  
 CX 20.00 cm  
 F1P 11.000 ppm  
 F1 3301.43 Hz  
 F2P -1.000 ppm  
 F2 -300.13 Hz  
 PPMCM 0.60000 ppm/cm  
 HZCM 180.07802 Hz/cm

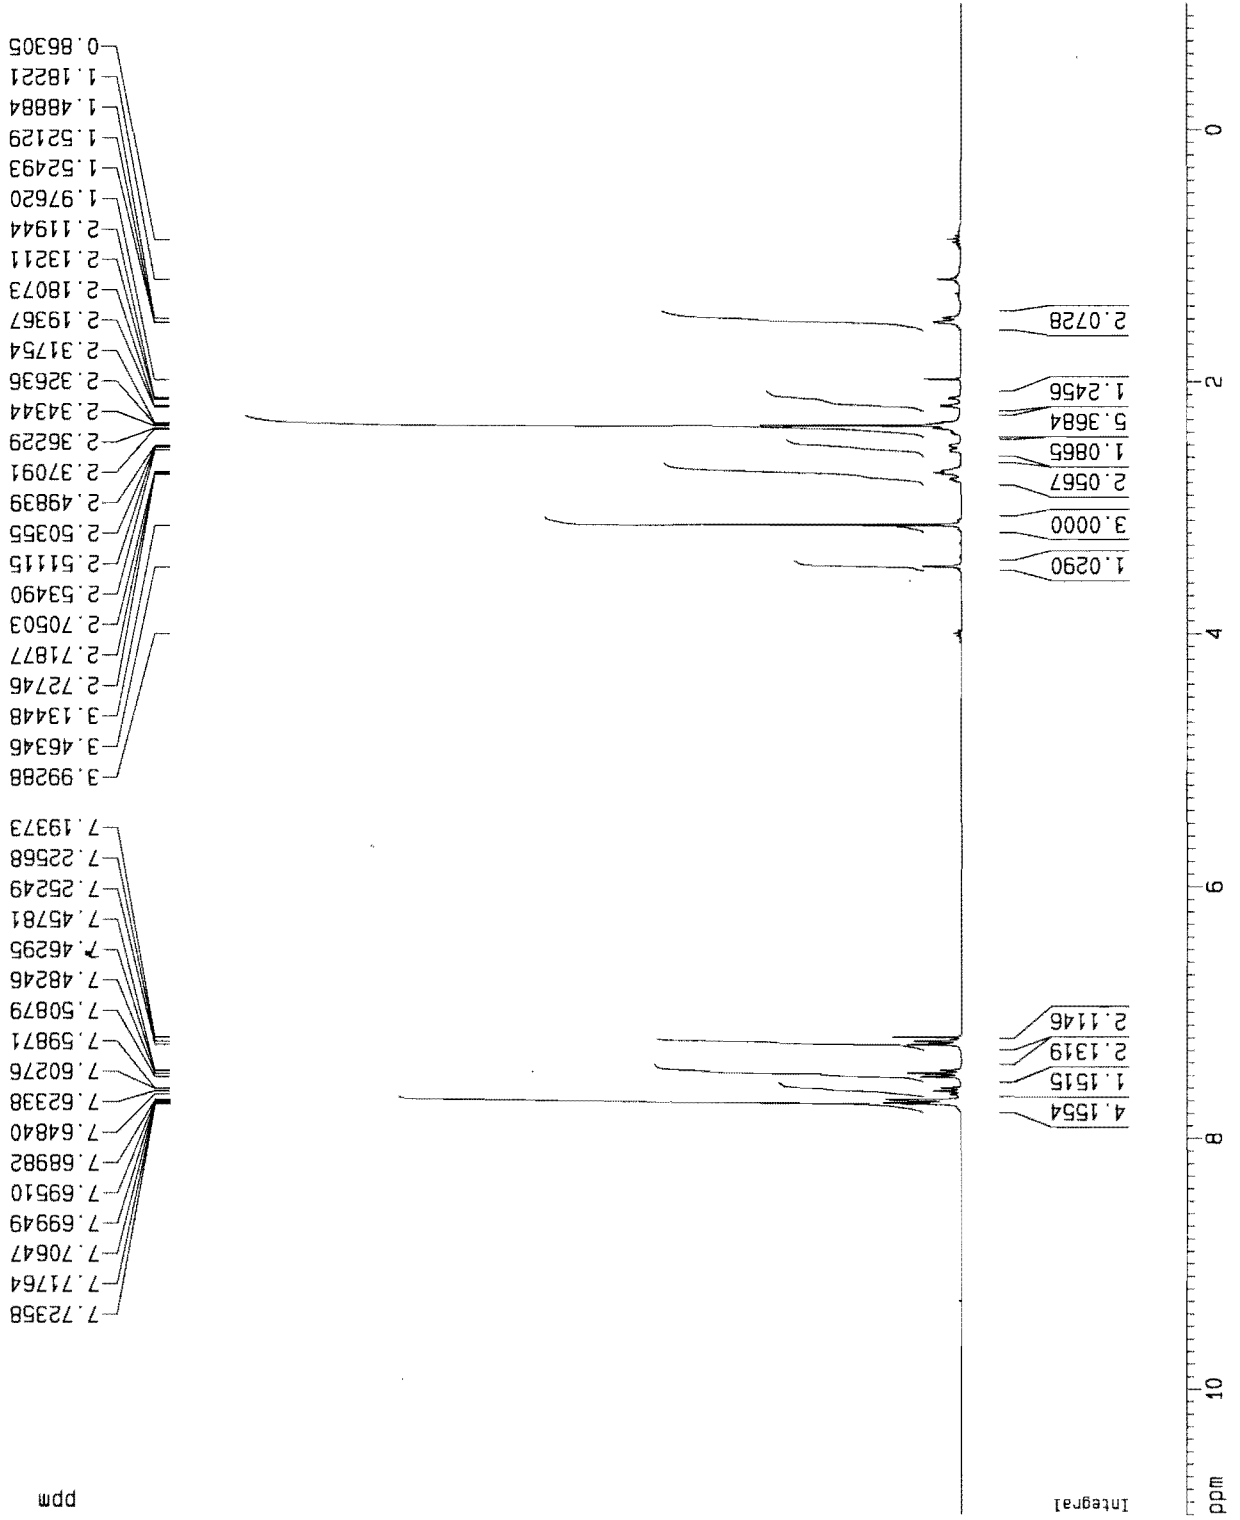

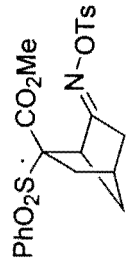

22b

Current Data Parameters  
 NAME pxx91112310  
 EXPNO 2  
 PROCNO 1

F2 - Acquisition Parameters  
 Date\_ 20101123  
 Time 17.55  
 INSTRUM spect  
 PROBHD 5 mm BBI 4H-B  
 PULPROG zgpg30  
 TO 65536  
 SOLVENT CDCl<sub>3</sub>  
 NS 1024  
 DS 4  
 SWH 25125.629 Hz  
 FIDRES 0.393387 Hz  
 AQ 1.3042164 sec  
 RG 16384  
 DW 19.900 usec  
 DE 6.00 usec  
 TE 300.0 K  
 O1 2.00000000 sec  
 d11 0.03000000 sec  
 d12 0.00002000 sec

===== CHANNEL f1 =====  
 NUC1 13C  
 P1 16.35 usec  
 PL1 -6.00 dB  
 SF01 100.6237959 MHz

===== CHANNEL f2 =====  
 CPOPRG2 waltz16  
 NUC2 1H  
 PCPD2 114.00 usec  
 PL2 0.00 dB  
 PL12 24.00 dB  
 PL13 24.00 dB  
 SF02 400.1316005 MHz

F2 - Processing parameters  
 SI 32768  
 SF 100.6127290 MHz  
 WDW EM  
 SSB 0  
 LB 1.00 Hz  
 GB 0  
 PC 1.40

10 NMR plot parameters  
 CX 20.00 cm  
 F1P 215.000 ppm  
 F1 21631.74 Hz  
 F2P -5.000 ppm  
 F2 -503.06 Hz  
 PPMCM 11.00000 ppm/cm  
 HZCM 1106.73999 Hz/cm

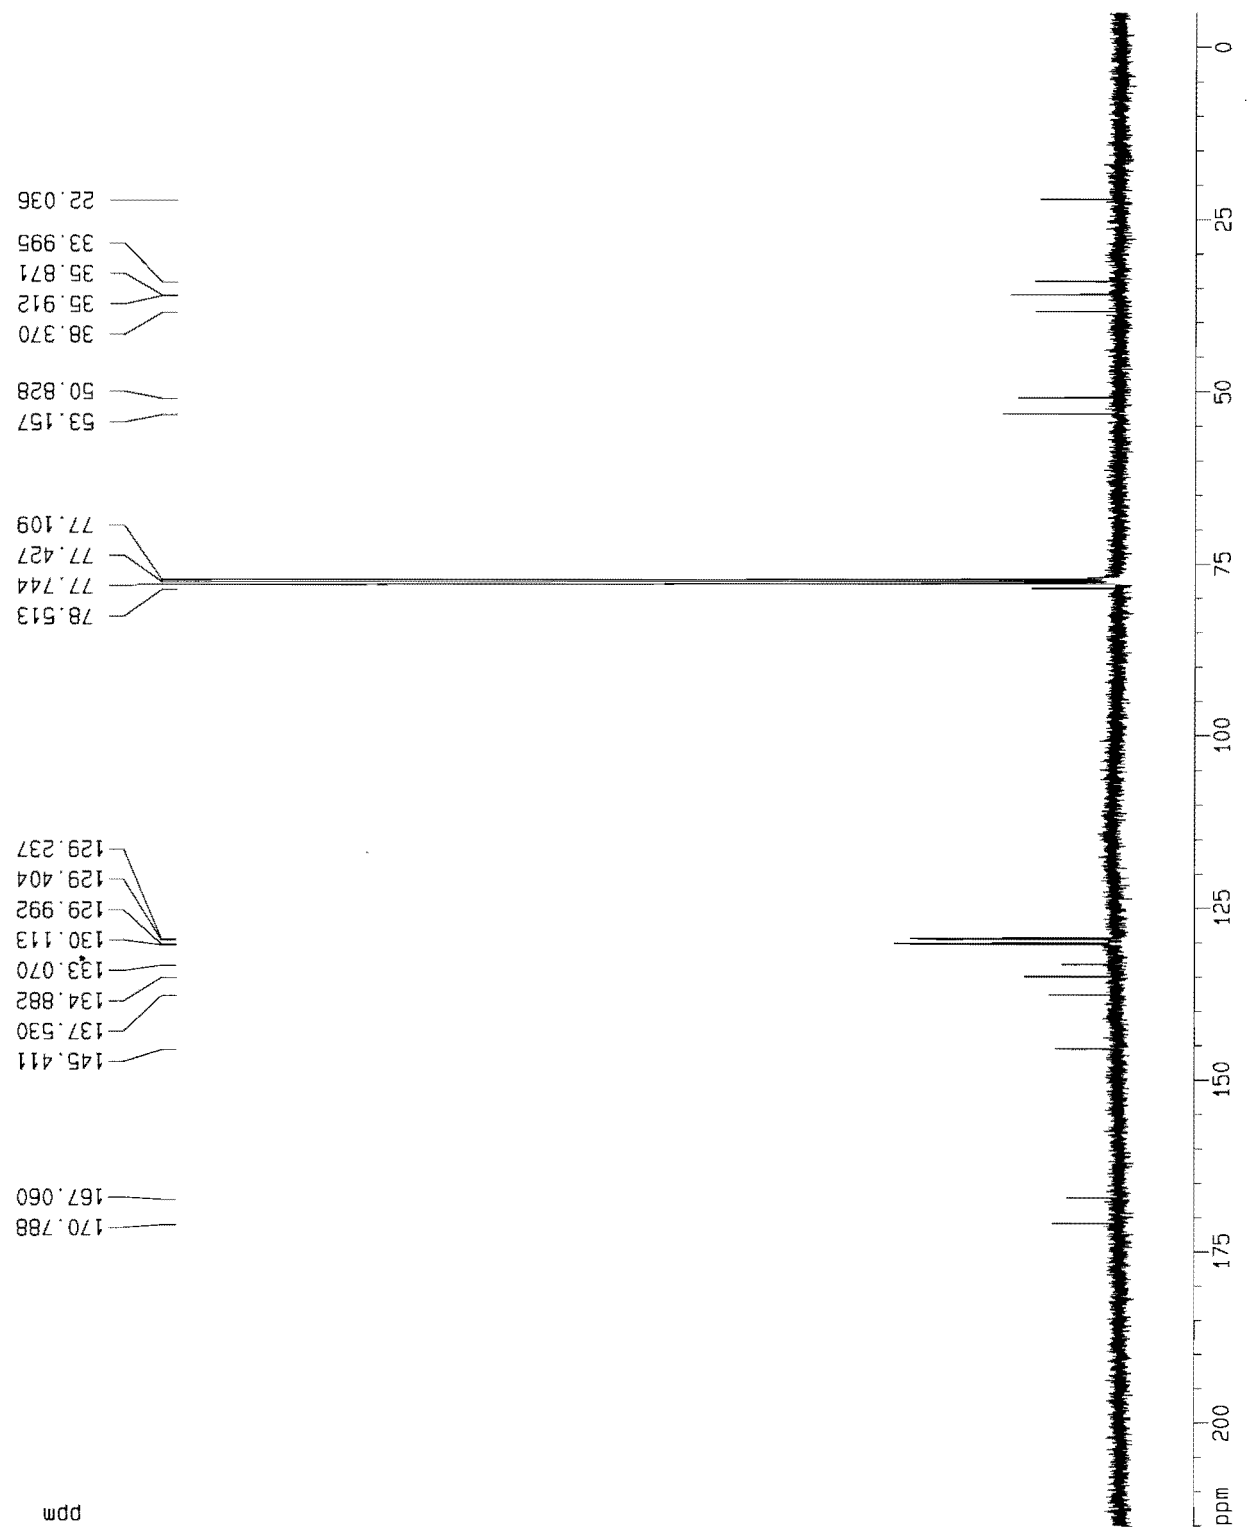

COSY

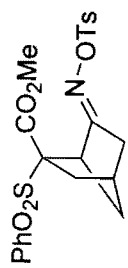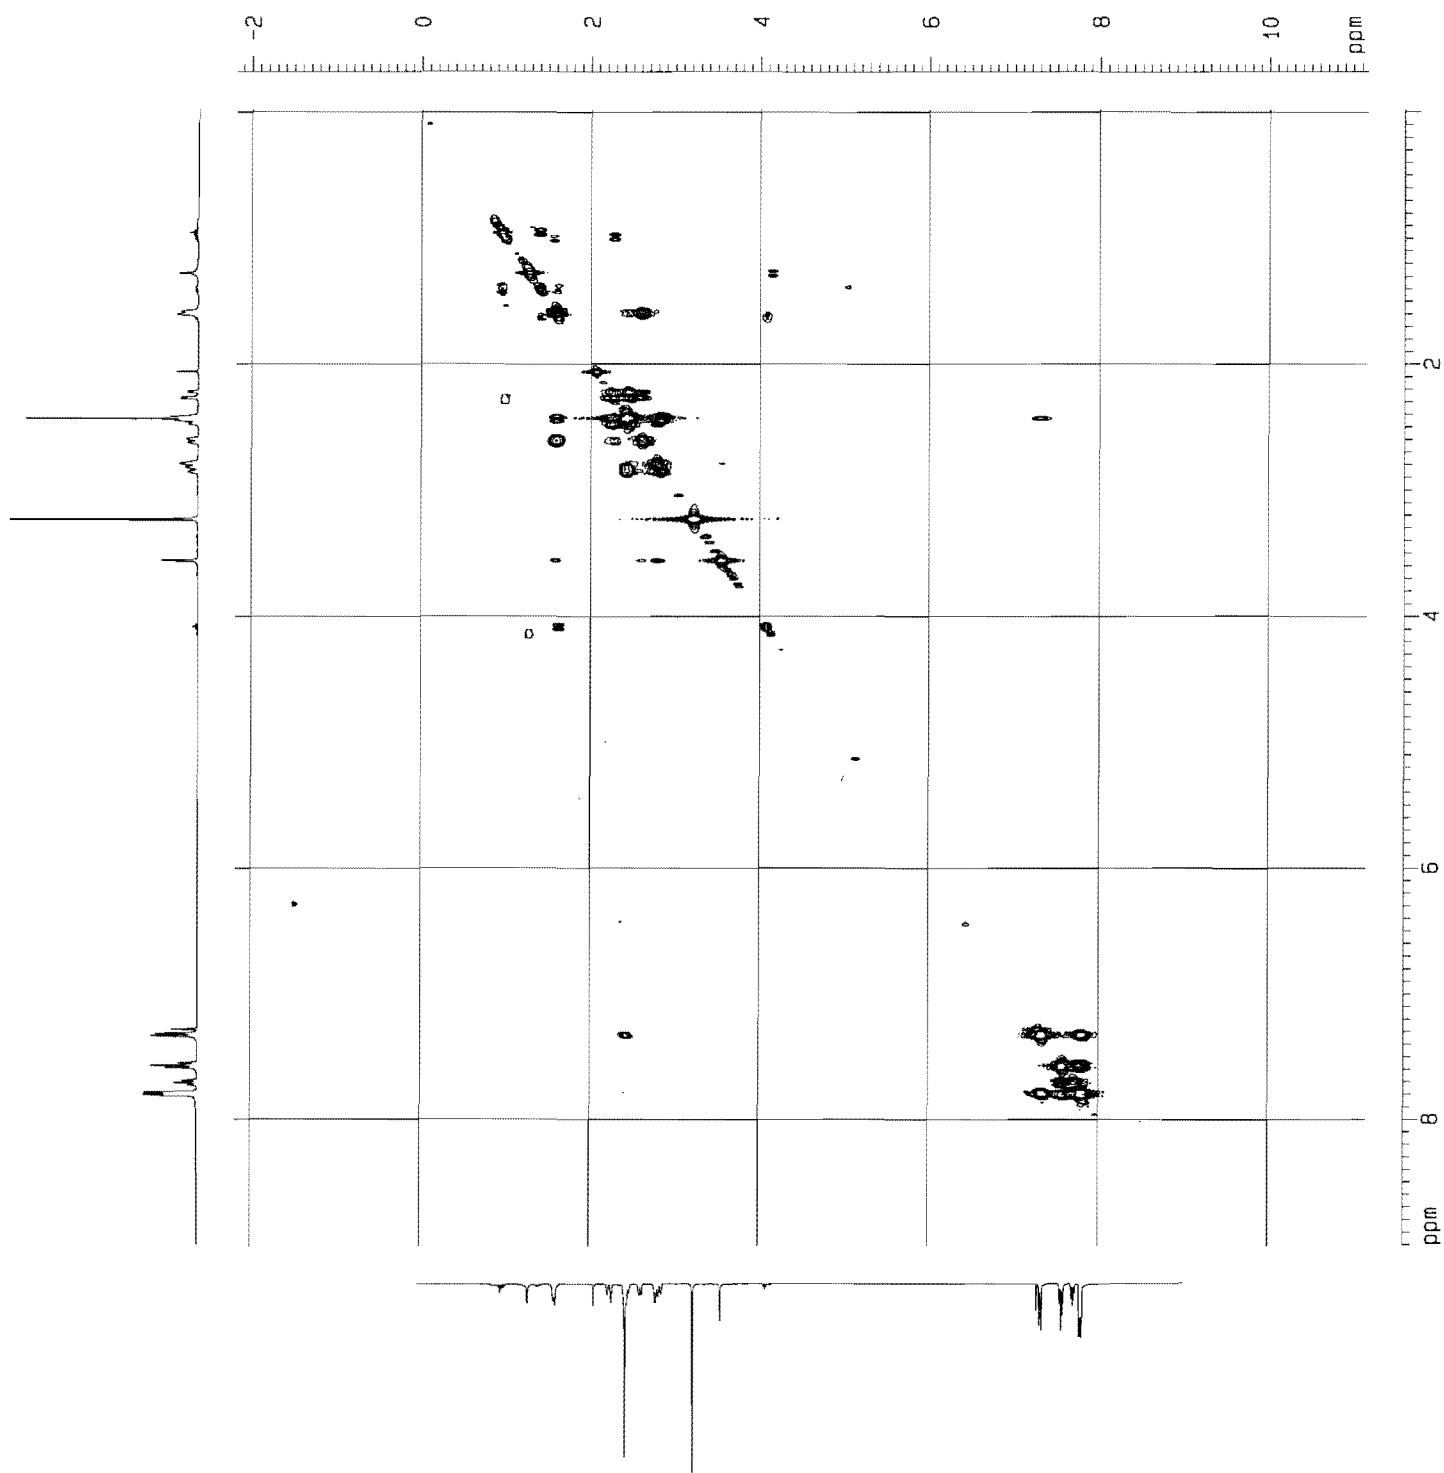

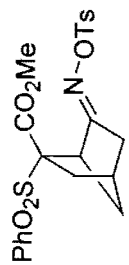

22b

HMBC

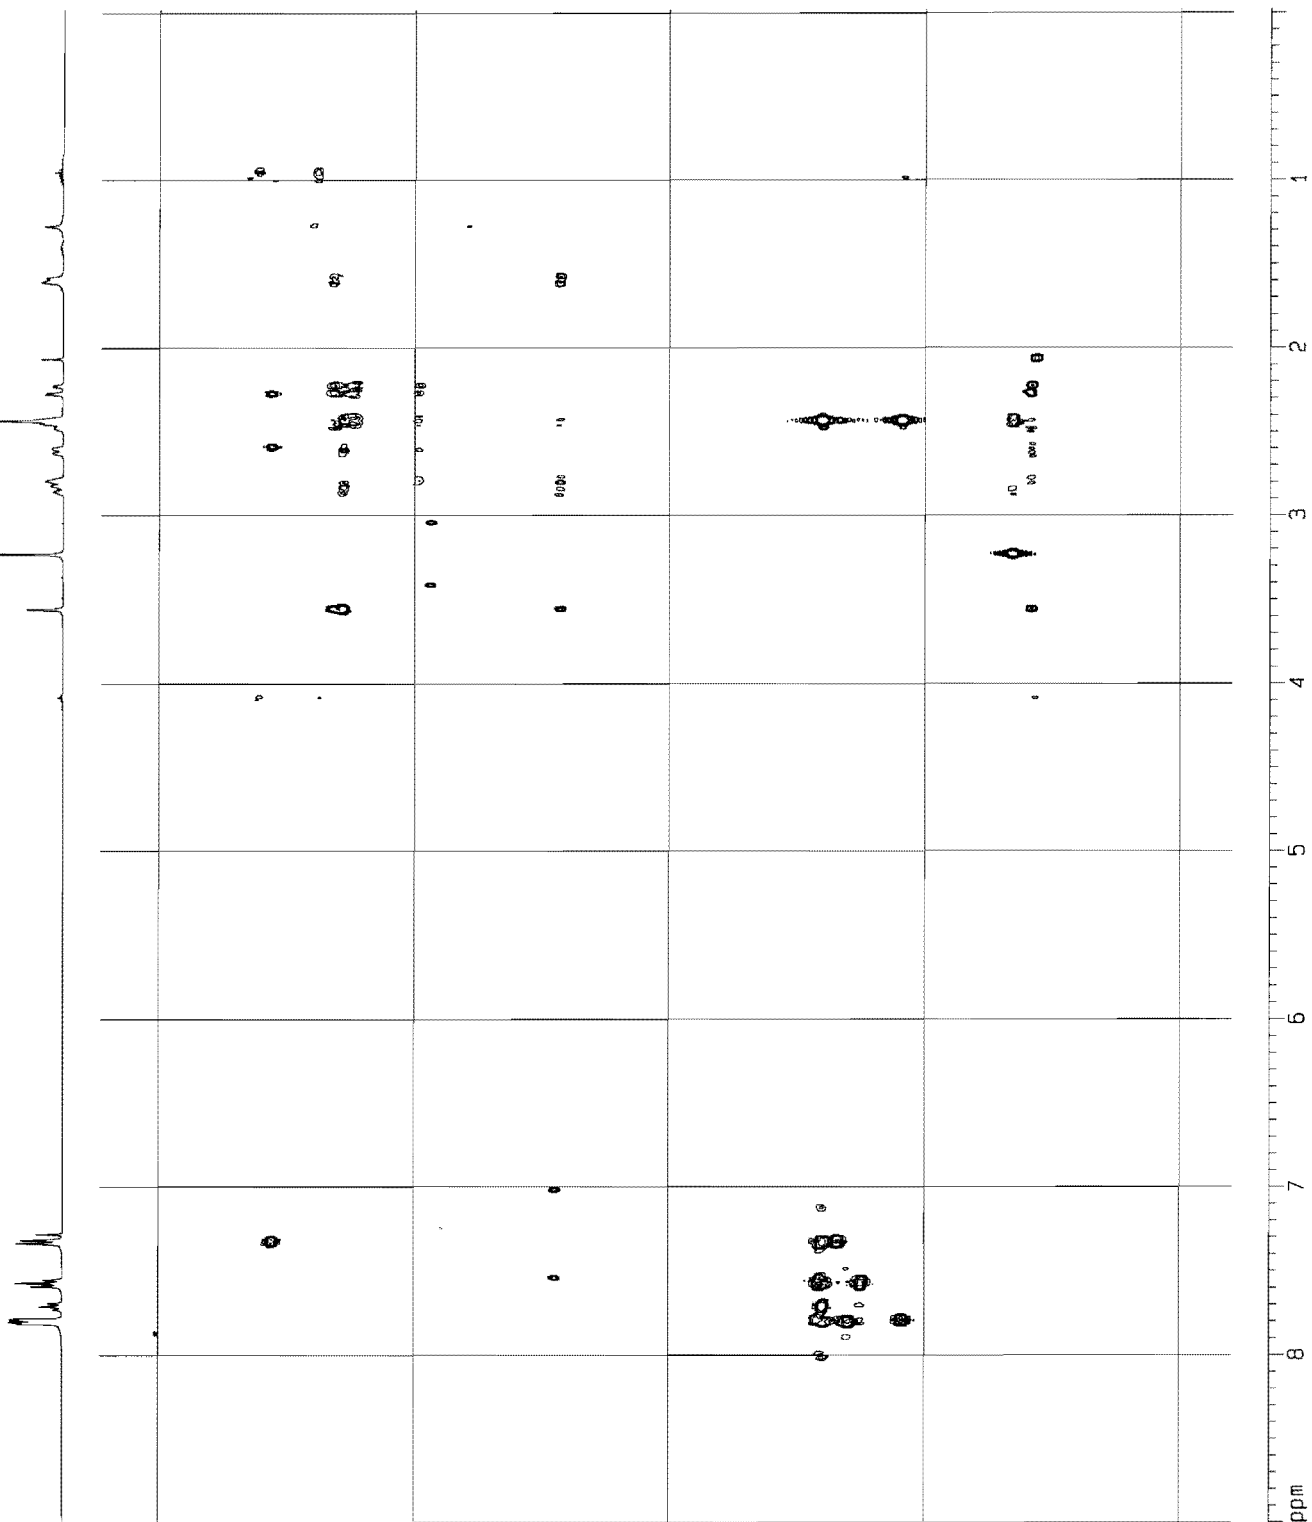

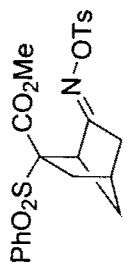

22b

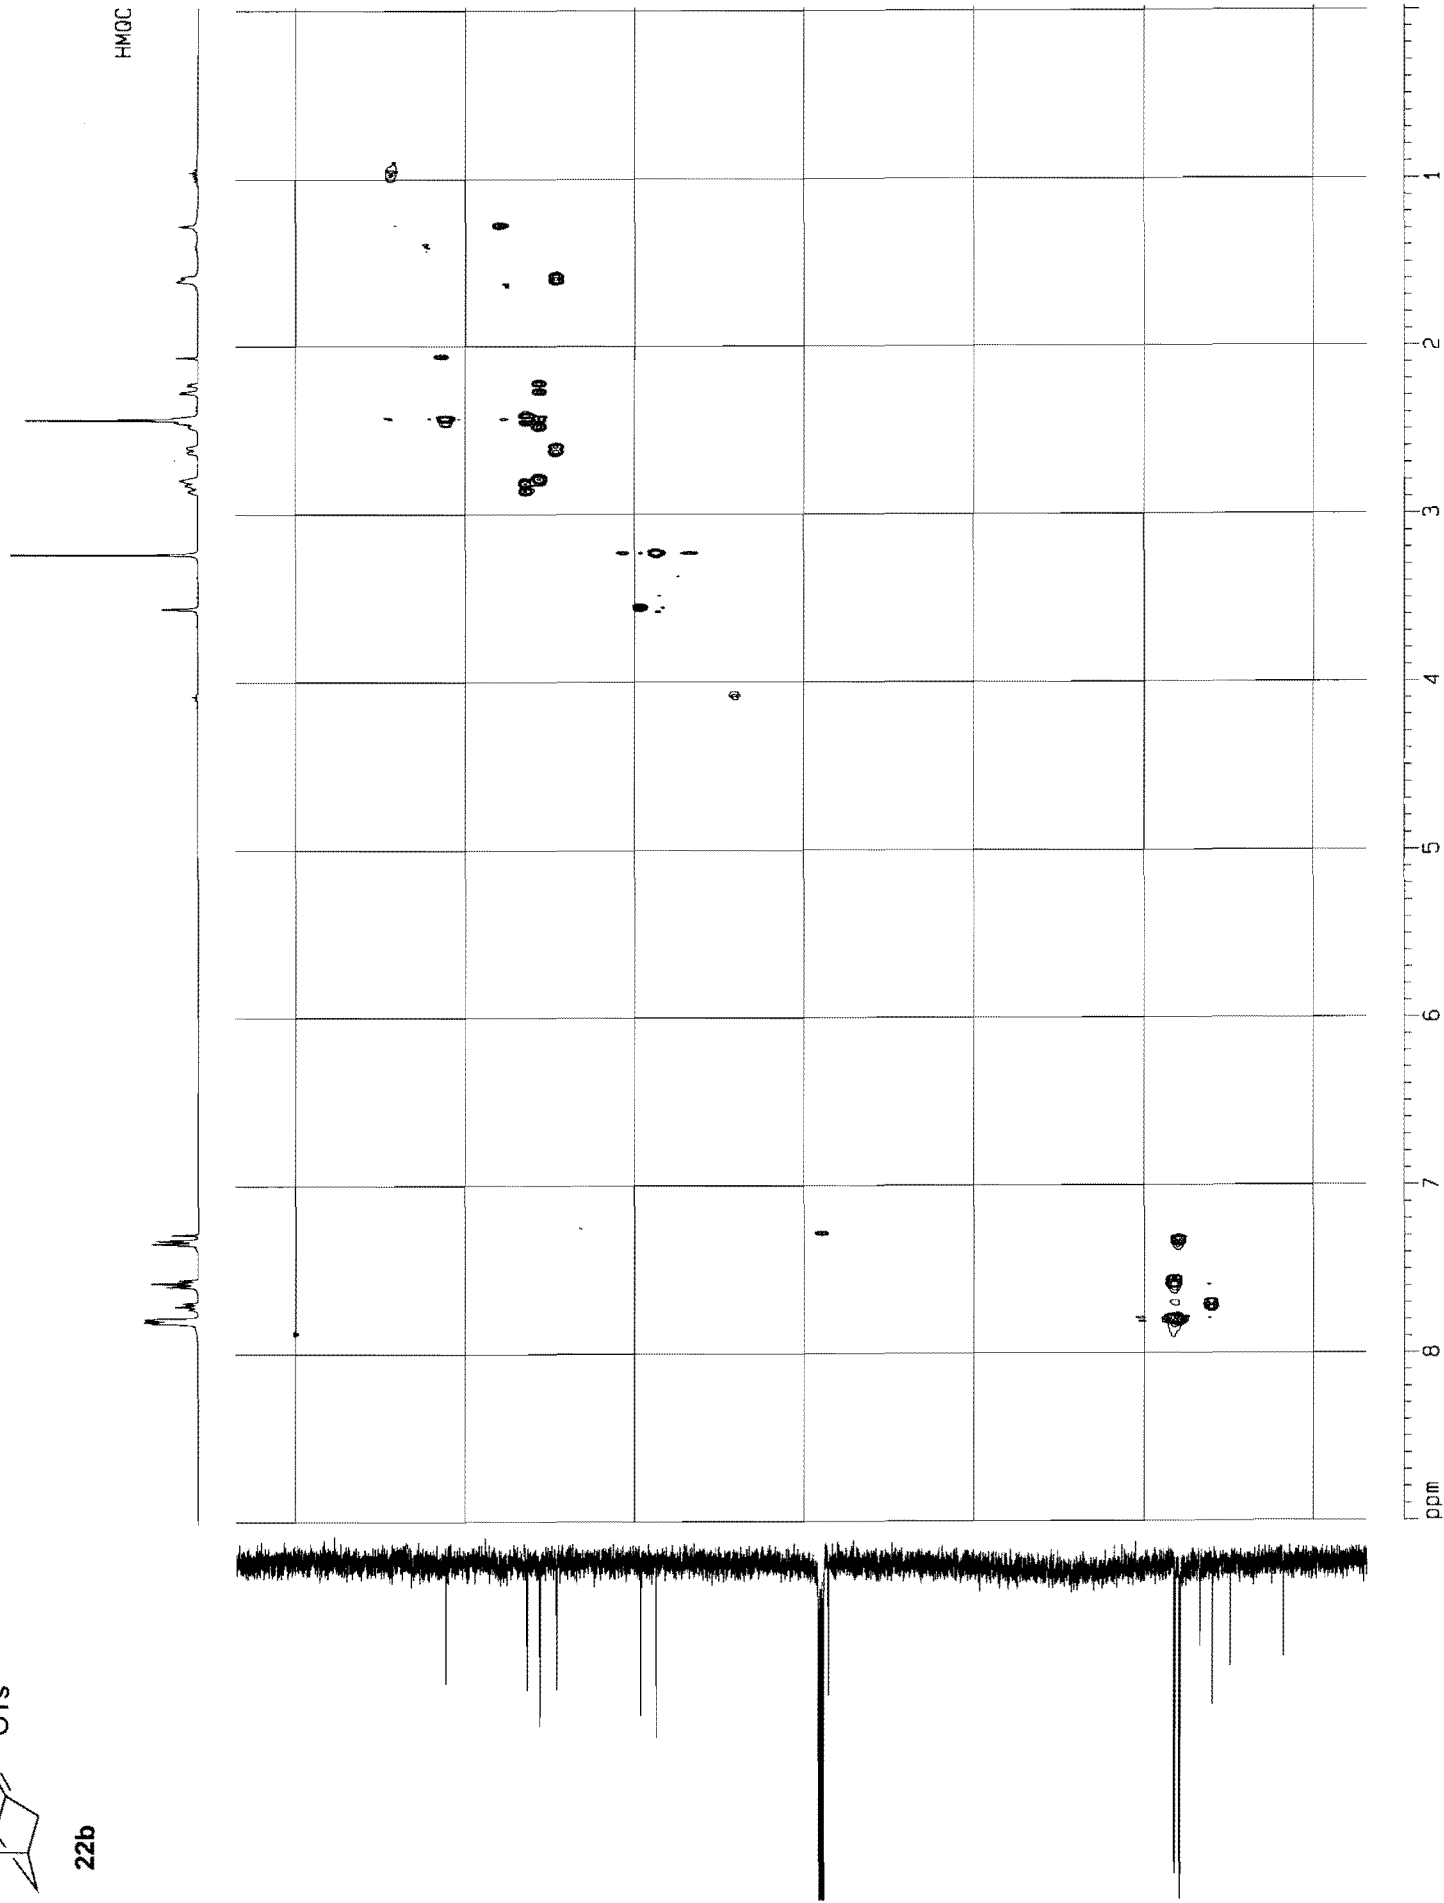

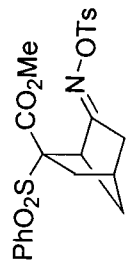

22b NOSEY

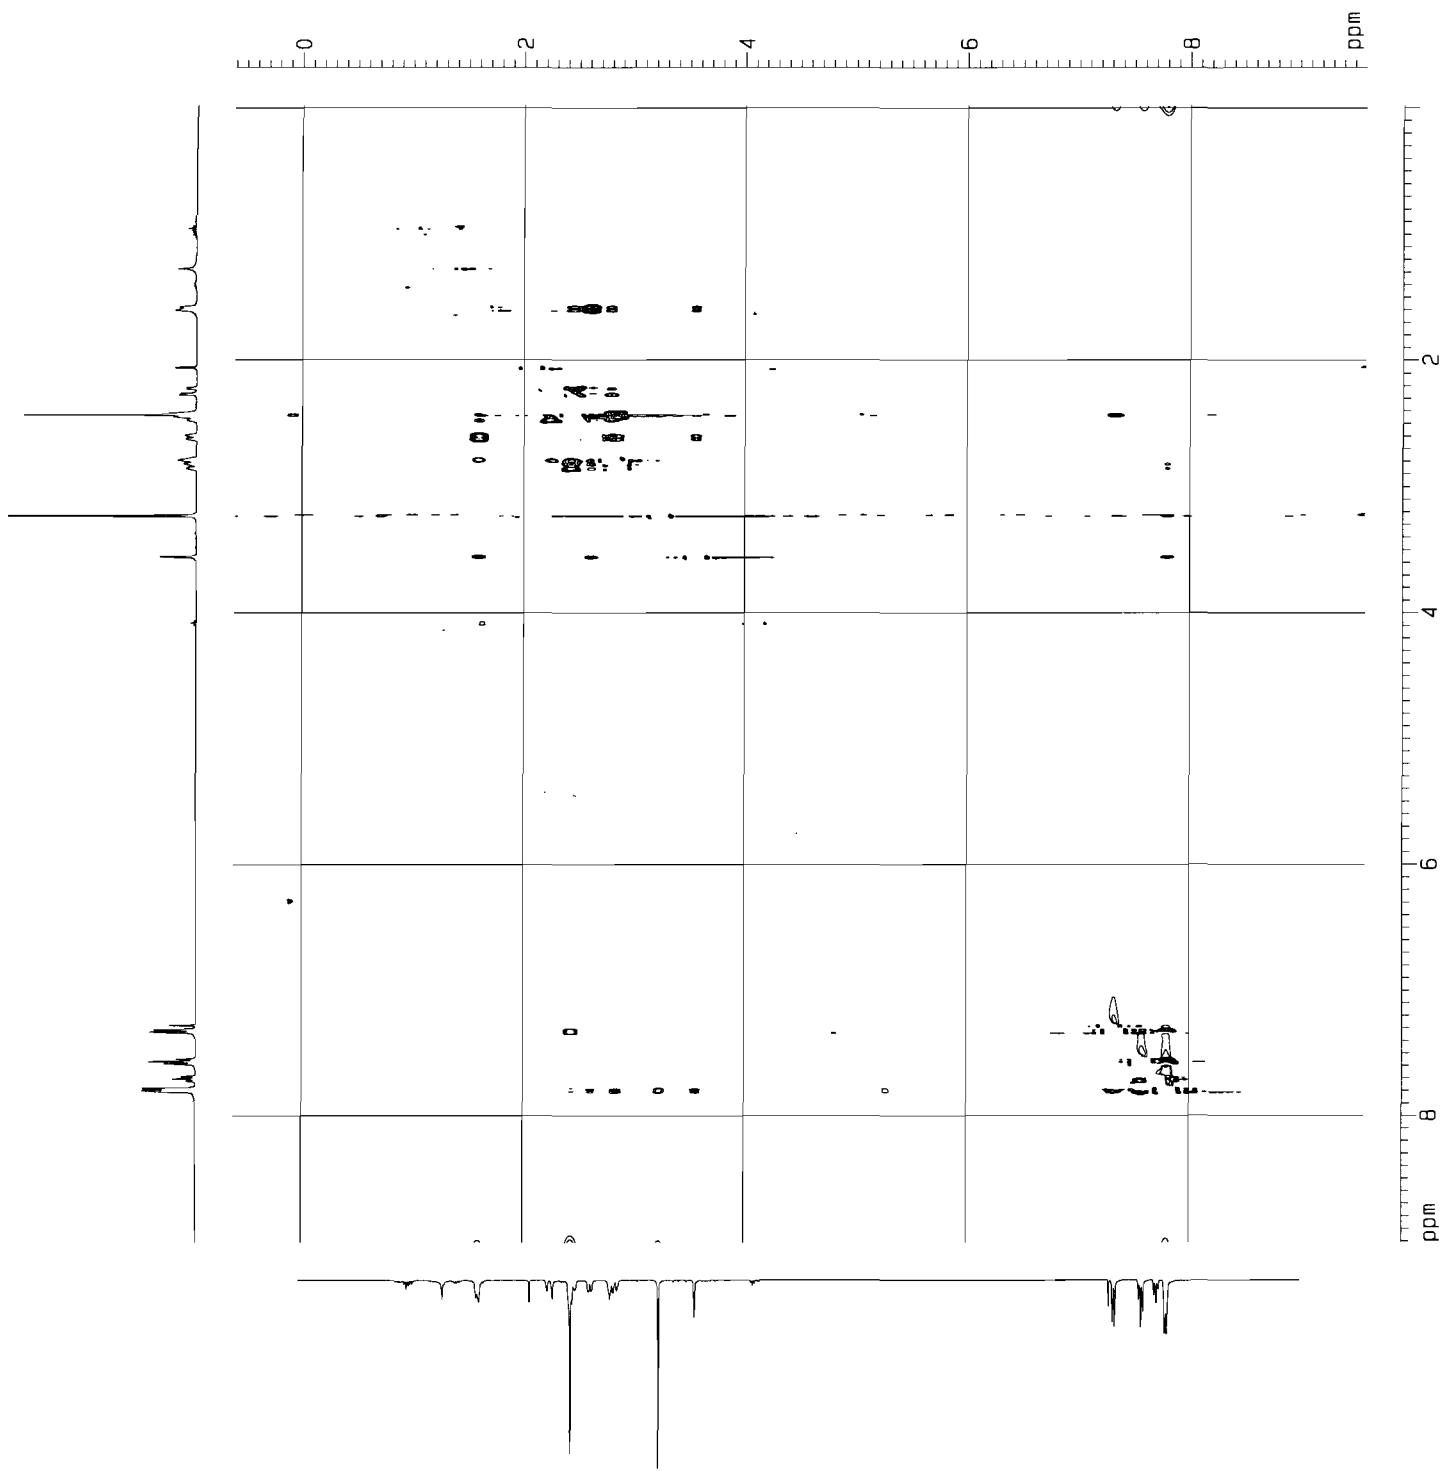

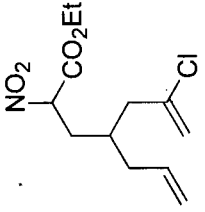

15e

Current Data Parameters  
 NAME Jun20-2010-Me1n  
 EXPNO 20  
 PROCNO 1

F2 - Acquisition Parameters  
 Date\_ 20100620  
 Time 18.21  
 INSTRUM spect  
 PROBHD 5 mm QNP 1H/1  
 PULPROG zg30  
 TD 65536  
 SOLVENT CDCl3  
 NS 16  
 DS 2  
 SWH 6172.839 Hz  
 FIDRES 0.094190 Hz  
 AQ 5.3084660 sec  
 RG 406.4  
 DW 81.000 usec  
 DE 6.00 usec  
 TE 300.0 K  
 D1 1.00000000 sec

==== CHANNEL f1 =====

NUC1 1H  
 P1 11.70 usec  
 PL1 0.00 dB  
 SF01 299.8716518 MHz

F2 - Processing parameters  
 SI 32768  
 SF 299.8700299 MHz  
 WDW EM  
 SSB 0  
 LB 0.30 Hz  
 GB 0  
 PC 1.00

1D NMR plot parameters  
 CX 20.00 cm  
 F1P 11.000 ppm  
 F1 3298.57 Hz  
 F2P -1.000 ppm  
 F2 -299.87 Hz  
 PPMCM 0.60000 ppm/cm  
 HZCM 179.92201 Hz/cm

1.19476  
 7.19340  
 5.66933  
 5.63928  
 5.21663  
 5.19884  
 5.17991  
 5.14955  
 5.13203  
 5.11842  
 5.07557  
 5.07223  
 5.06033  
 5.05416  
 5.04387  
 4.25667  
 4.23281  
 4.20895  
 4.18512  
 2.34344  
 2.32000  
 2.29430  
 2.27977  
 2.26357  
 2.24391  
 2.21340  
 2.11571  
 2.09409  
 2.07142  
 2.04735  
 2.02331  
 1.49876  
 1.26400  
 1.24020  
 1.21635

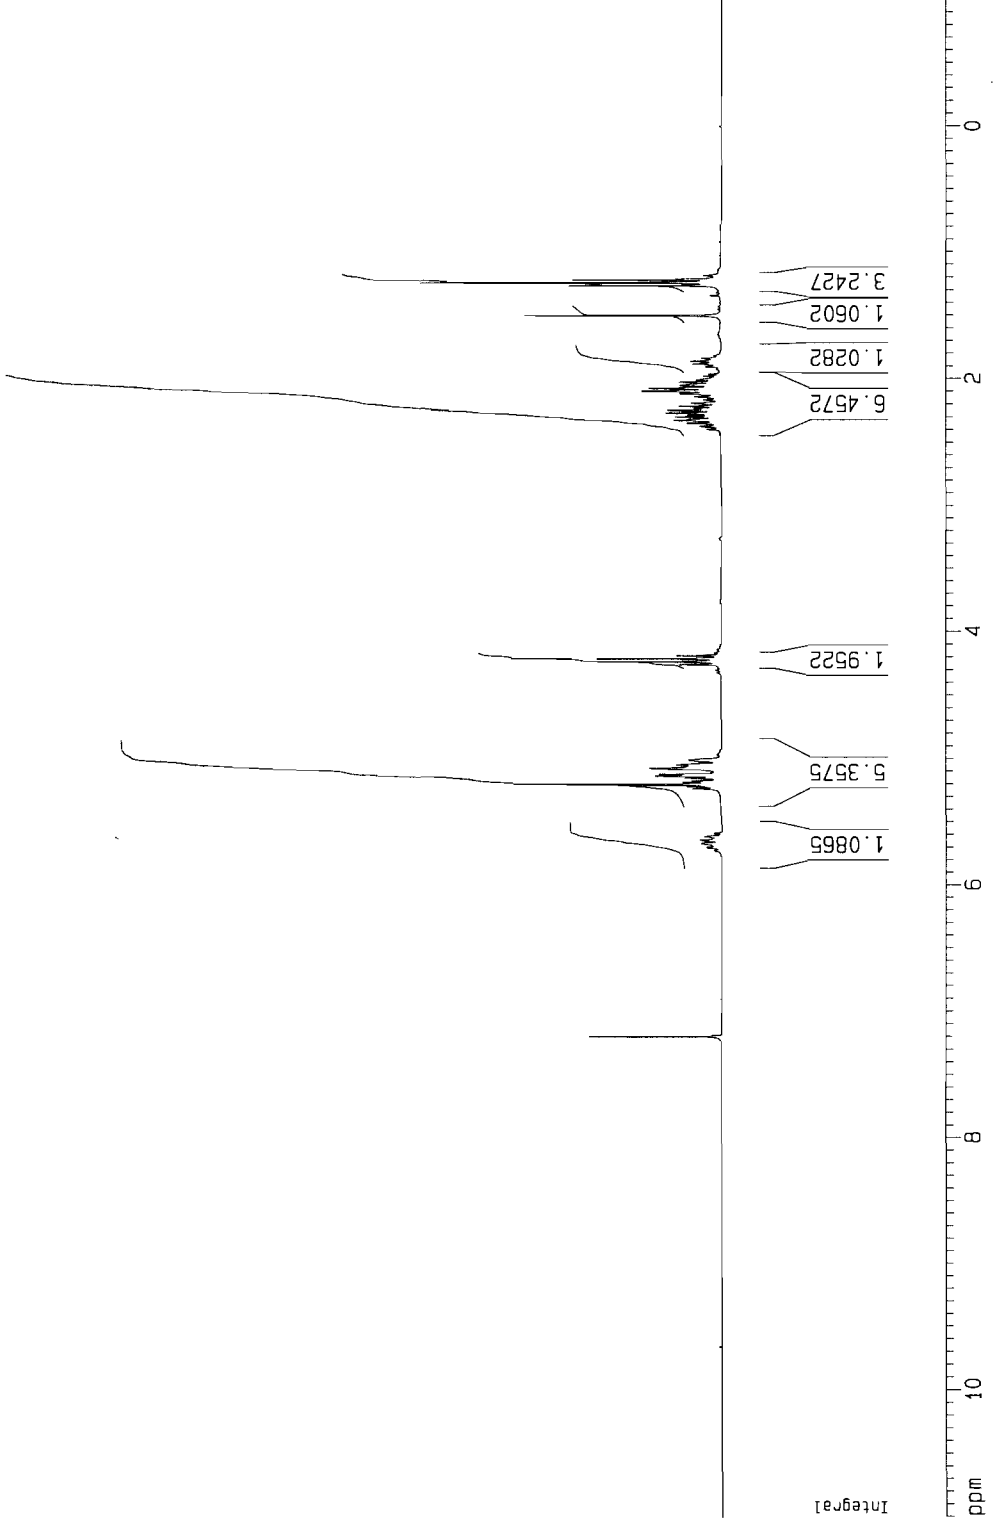



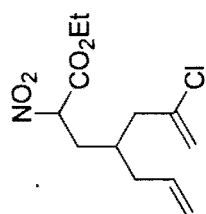

15e

Current Data Parameters  
 NAME Jun21-2010-Wein  
 EXPNO 11  
 PROCNO 1

F2 - Acquisition Parameters  
 Date\_ 20100621  
 Time 11.27  
 INSTRUM spect  
 PROBHD 5 mm QNP 1H/1  
 PULPROG zgpg30  
 TD 65536  
 SOLVENT CDC13  
 NS 68  
 DS 4  
 SWH 16796.992 Hz  
 FIDRES 0.286619 Hz  
 AQ 1.7433076 sec  
 RG 2048  
 DW 26.600 usec  
 DE 6.00 usec  
 TE 300.0 K  
 D1 2.00000000 sec  
 D11 0.03000000 sec  
 D12 0.00002000 sec

===== CHANNEL f1 =====  
 NUC1 13C  
 P1 5.40 usec  
 PL1 -6.00 dB  
 SF01 75.4106357 MHz

===== CHANNEL f2 =====  
 CPDPRG2 waltz16  
 NUC2 1H  
 PCPD2 115.00 usec  
 PL2 0.00 dB  
 PL12 20.00 dB  
 PL13 20.00 dB  
 SF02 299.8711995 MHz

F2 - Processing parameters  
 SI 32768  
 SF 75.4023410 MHz  
 WDW EM  
 SSB 0  
 LB 1.00 Hz  
 GB 0  
 PC 1.40

1D NMR plot parameters  
 CX 20.00 cm  
 F1P 215.000 ppm  
 F1 16211.50 Hz  
 F2P -5.000 ppm  
 F2 -377.01 Hz  
 PPMCM 11.00000 ppm/cm  
 HZCM 829.42578 Hz/cm

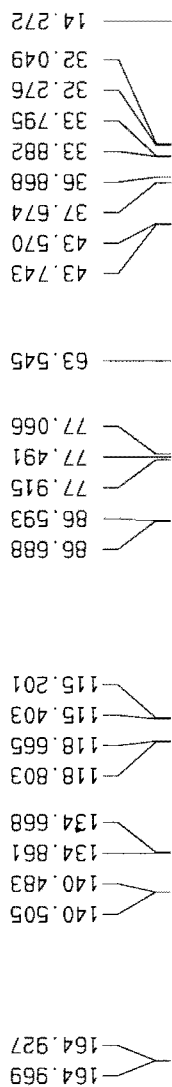

ppm

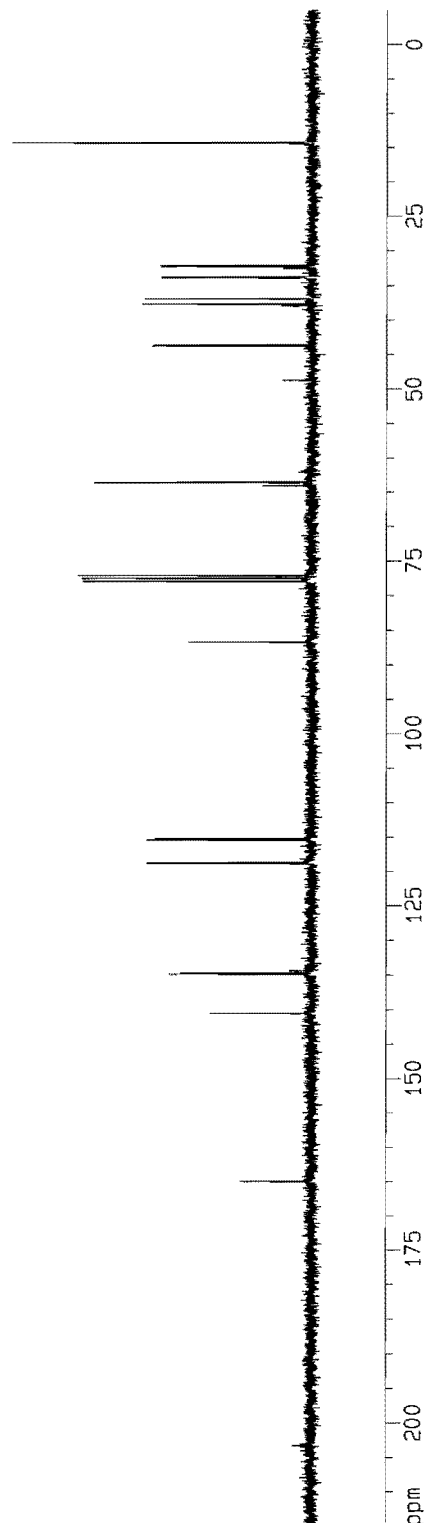

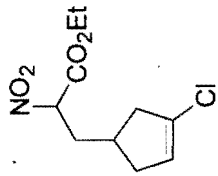

16e

Current Data Parameters  
 NAME Jul10-2010-Wein  
 EXPNO 50  
 PROCNO 1

F2 - Acquisition Parameters  
 Date\_ 20100710  
 Time 18.18  
 INSTRUM spect  
 PROBHD 5 mm GNP 1H/1  
 PULPROG zg30  
 TO 65536  
 SOLVENT CDCl3  
 NS 16  
 DS 2  
 SWH 6172.839 Hz  
 FIDRES 0.054190 Hz  
 AQ 5.3084660 sec  
 RG 406.4  
 DW 81.000 usec  
 DE 6.00 usec  
 TE 300.0 K  
 D1 1.00000000 sec

===== CHANNEL f1 =====

NUC1 1H  
 P1 11.70 usec  
 PL1 0.00 dB  
 SF01 299.8716516 MHz

F2 - Processing parameters  
 SI 32768  
 SF 299.8700297 MHz  
 MDW EM  
 SSB 0  
 LB 0.30 Hz  
 GB 0  
 PC 1.00

10 NMR plot parameters  
 CX 20.00 cm  
 F1P 11.000 ppm  
 F1 3298.57 Hz  
 F2P -1.000 ppm  
 F2 -299.87 Hz  
 PPMCM 0.60000 ppm/cm  
 HZCM 179.92201 Hz/cm

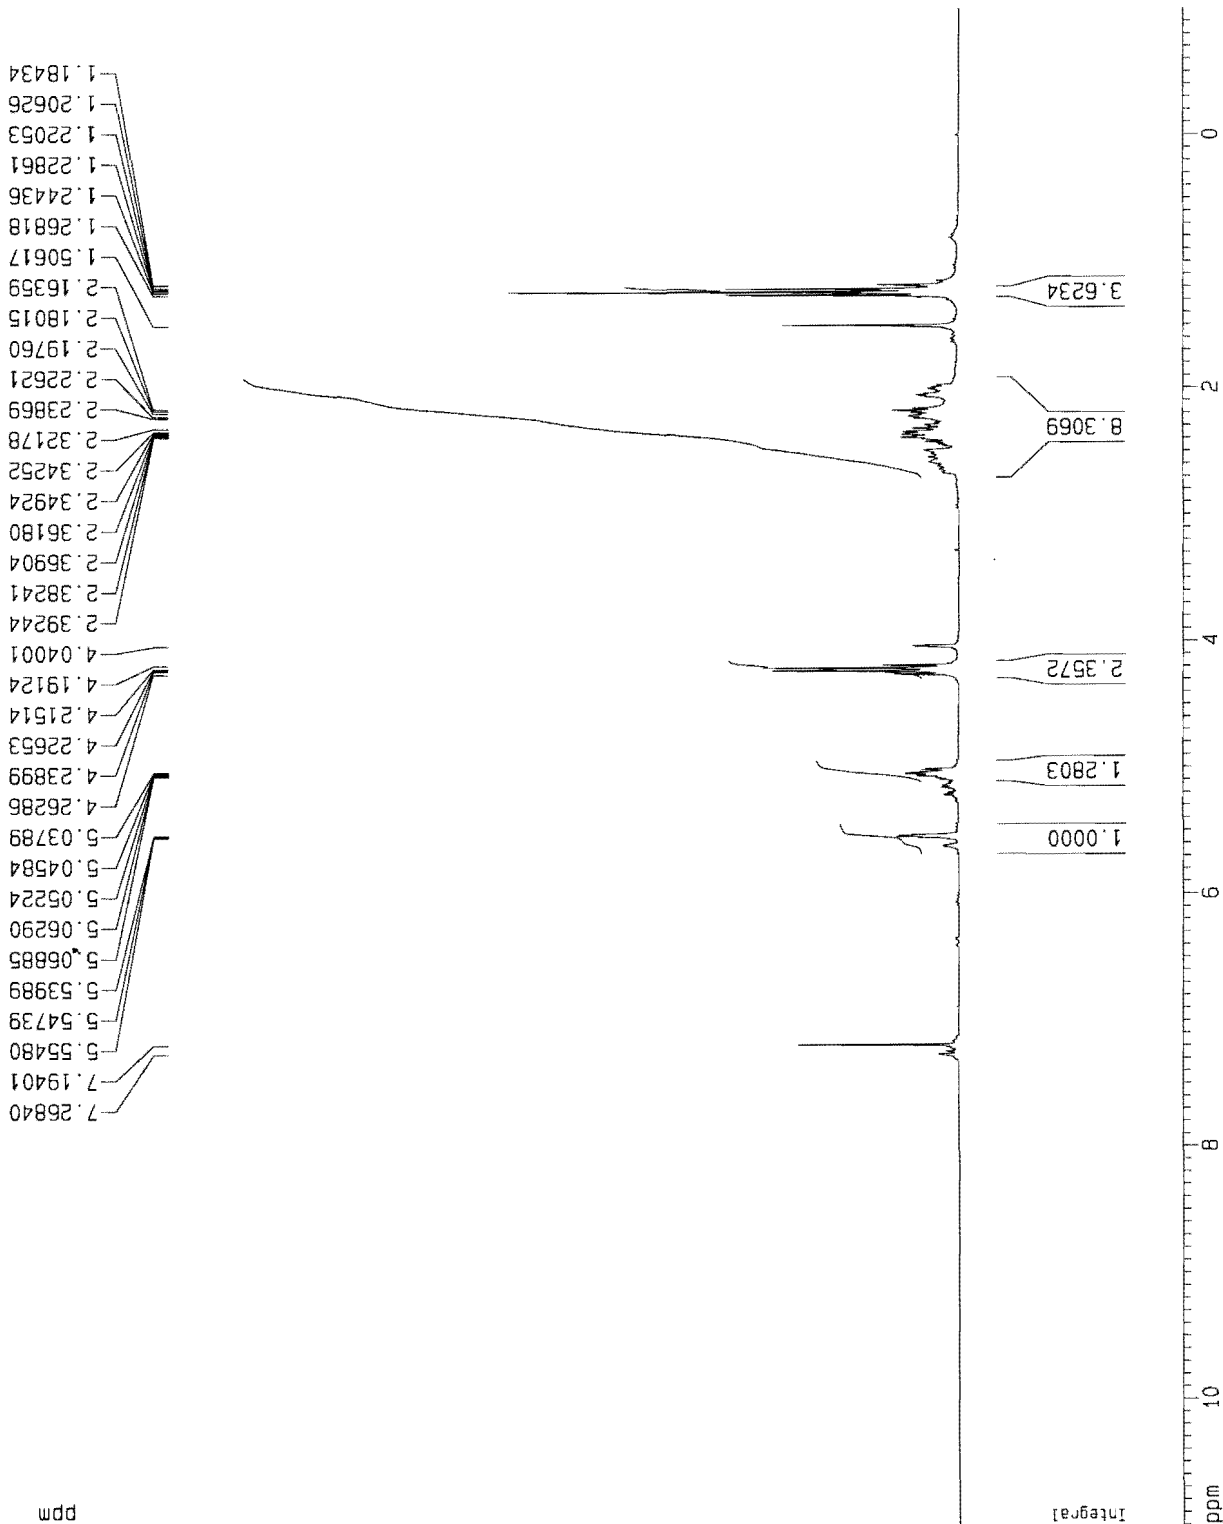

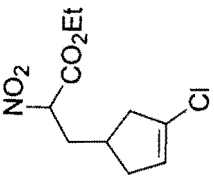

16e

Current Data Parameters  
 NAME Jul10-2010-Wein  
 EXPNO 41  
 PROCNO 1

F2 - Acquisition Parameters  
 Date\_ 20100710  
 Time 18.10  
 INSTRUM spect  
 PROBHD 5 mm QNP 1H/1  
 PULPROG zgpg30  
 TD 65536  
 SOLVENT CDCl3  
 NS 1123  
 DS 4  
 SWH 18796.992 Hz  
 FIDRES 0.286819 Hz  
 AQ 1.7433076 Sec  
 RG 2048  
 DW 26.600 usec  
 DE 6.00 usec  
 TE 300.0 K  
 D1 2.00000000 Sec  
 D11 0.03000000 Sec  
 D12 0.00002000 Sec

\*\*\*\*\* CHANNEL f1 \*\*\*\*\*  
 NUC1 13C  
 P1 5.40 usec  
 PL1 -6.00 dB  
 SF01 75.4106357 MHz

\*\*\*\*\* CHANNEL f2 \*\*\*\*\*  
 CPDPRG2 waltz16  
 NUC2 1H  
 PCPD2 115.00 usec  
 PL2 0.00 dB  
 PL12 20.00 dB  
 PL13 20.00 dB  
 SF02 299.8711995 MHz

F2 - Processing parameters  
 SI 32768  
 SF 75.4023318 MHz  
 WDW EM  
 SSB 0  
 LB 1.00 Hz  
 GB 0  
 PC 1.40

ID NMR plot parameters  
 CX 20.00 cm  
 F1P 215.000 ppm  
 F1 16211.50 Hz  
 F2 -5.000 ppm  
 F2 -377.01 Hz  
 PPMCM 11.00000 ppm/cm  
 HZCM 829.42560 Hz/cm

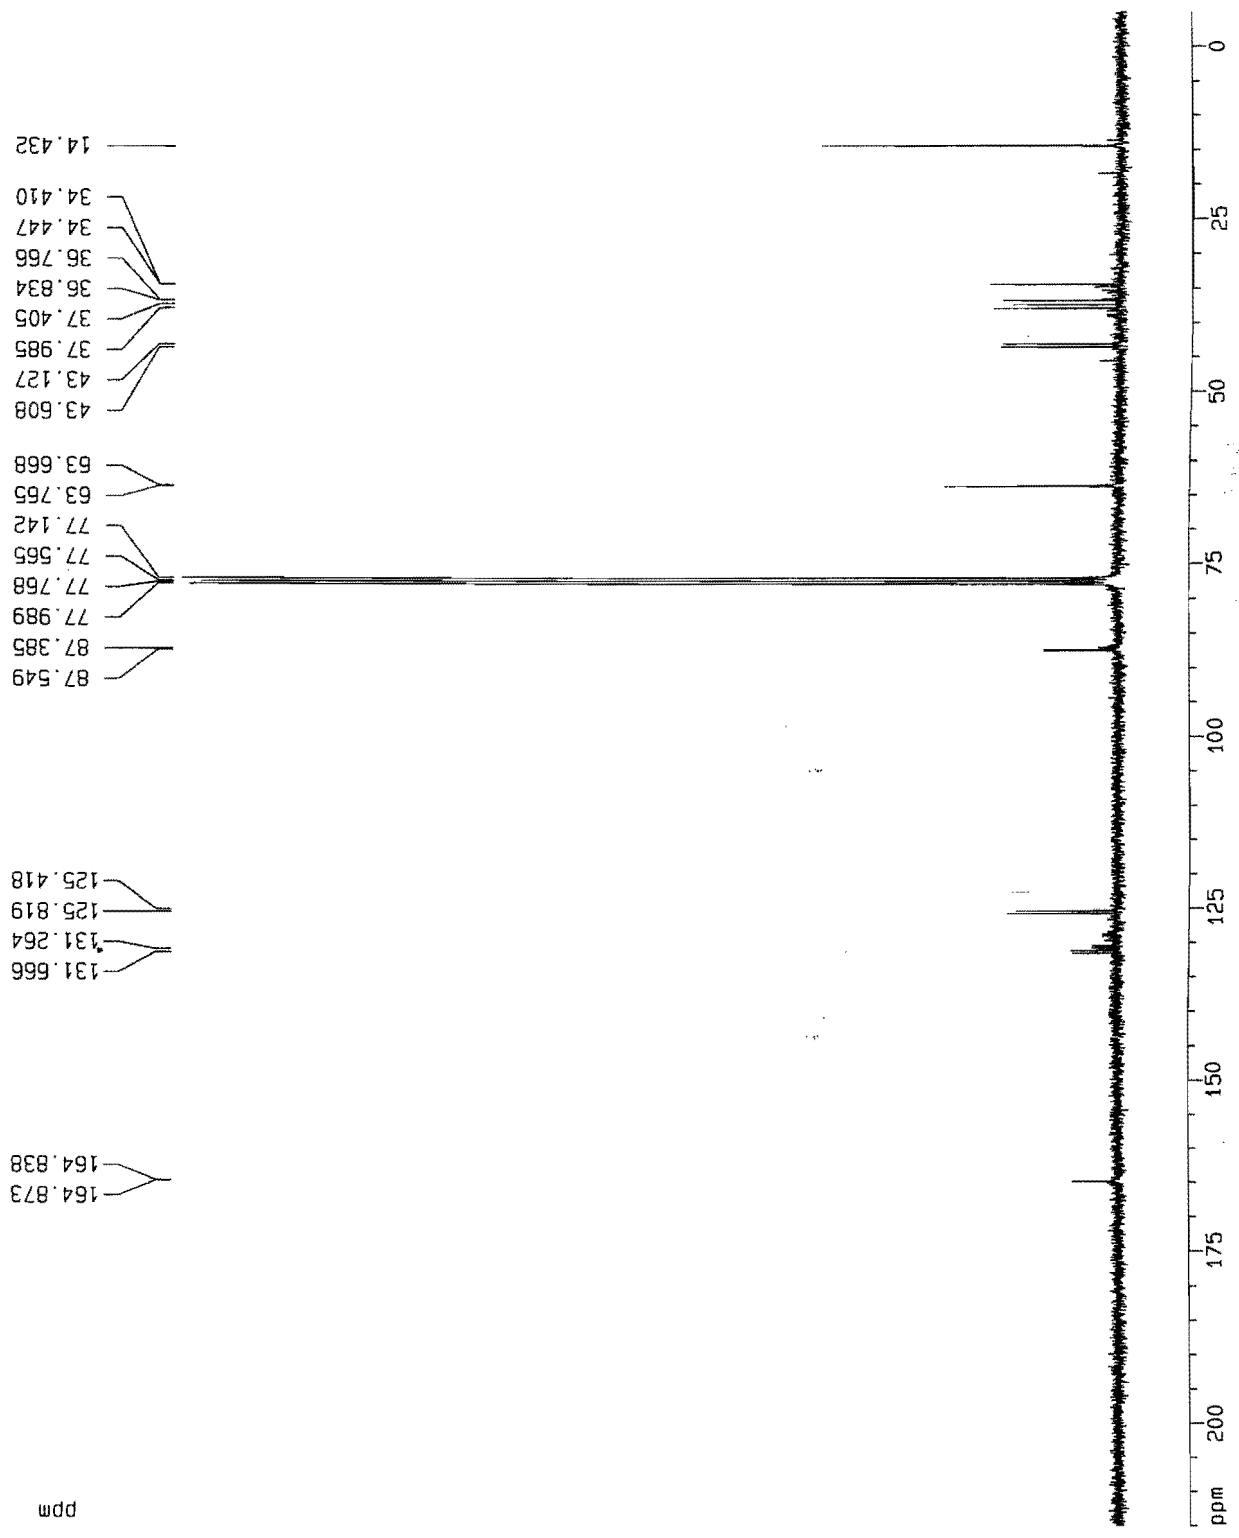

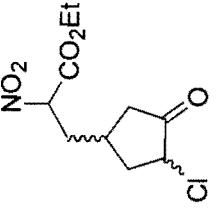

17e

Current Data Parameters

NAME Jul11-2010-MeIn  
 EXPNO 20  
 PROCNO 1

F2 - Acquisition Parameters

Date\_ 20100711  
 Time 15.21  
 INSTRUM spect  
 PROBHD 5 mm QNP 1H/1  
 PULPROG zg30  
 TD 65536  
 SOLVENT CDCl3  
 NS 16  
 DS 2  
 SWH 6172.839 Hz  
 FIDRES 0.094190 Hz  
 AQ 5.3084660 sec  
 RG 574.7  
 DW 81.000 usec  
 DE 6.00 usec  
 TE 300.0 K  
 D1 1.00000000 sec

CHANNEL f1

NUC1 1H  
 P1 11.70 usec  
 PL1 0.00 dB  
 SF01 299.8718518 MHz

F2 - Processing parameters

SI 32768  
 SF 299.8700296 MHz  
 WDW EM  
 SSB 0  
 LB 0.30 Hz  
 GB 0  
 PC 1.00

1D NMR plot parameters

CX 20.00 cm  
 F1P 11.000 ppm  
 F1 3298.57 Hz  
 F2P -1.000 ppm  
 F2 -299.87 Hz  
 PPMCM 0.60000 ppm/cm  
 HZCM 179.92201 Hz/cm

0.81338  
 1.18444  
 1.22031  
 1.22661  
 1.23431  
 1.24416  
 1.25030  
 1.25815  
 1.26774  
 1.27377  
 1.28202  
 1.51872  
 1.97821  
 2.06216  
 2.28204  
 2.30049  
 2.43719  
 4.08020  
 4.09867  
 4.21734  
 4.22518  
 4.23867  
 4.24158  
 4.24871  
 4.26231  
 4.26554  
 4.28386  
 4.28942  
 5.06509  
 5.09073  
 5.09693  
 5.10208  
 7.19496

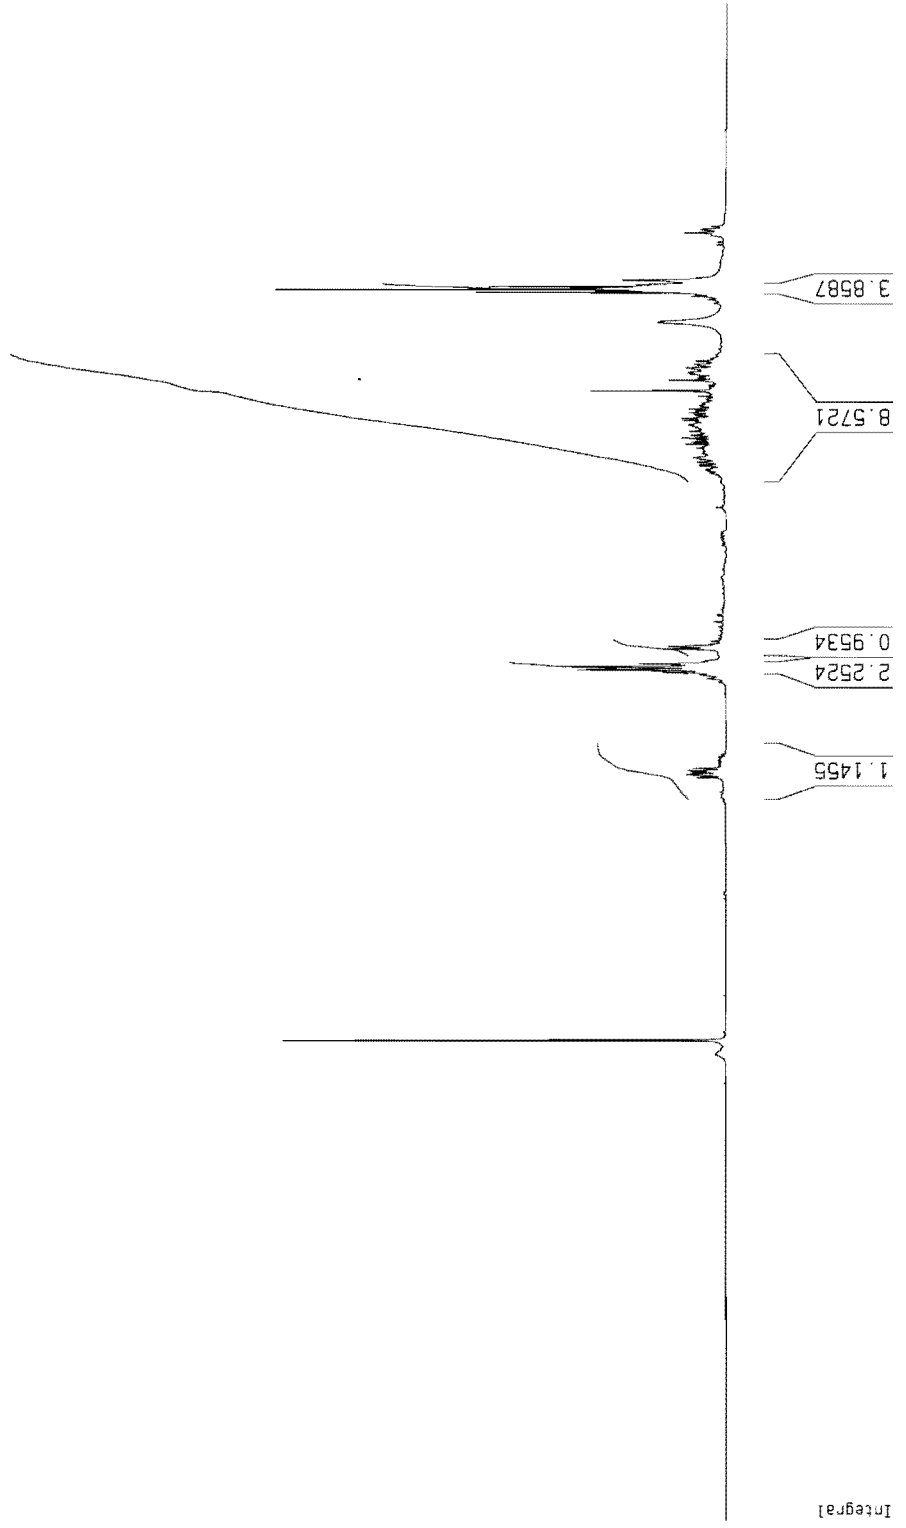

Integral  
 ppm

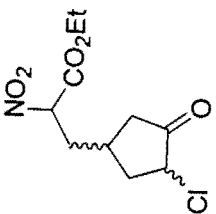

Current Data Parameters  
 NAME Jul11-2010-Wein  
 EXPNO 22  
 PROCNO 1

F2 - Acquisition Parameters  
 Date\_ 20100711  
 Time\_ 16.59  
 INSTRUM spect  
 PROBHD 5 mm GNP 1H/1  
 PULPROG zgpg30  
 TO 65536  
 SOLVENT CDCl3  
 NS 15972  
 DS 4  
 SWH 18796.992 Hz  
 FIDRES 0.286819 Hz  
 AQ 1.7433076 sec  
 RG 4096  
 DW 26.600 usec  
 DE 5.00 usec  
 TE 300.0 K  
 D1 2.00000000 sec  
 D11 0.03000000 sec  
 D12 0.00002000 sec

==== CHANNEL f1 =====  
 NUC1 13C  
 P1 5.40 usec  
 PL1 -6.00 dB  
 SF01 75.4106357 MHz

==== CHANNEL f2 =====  
 CPDPRG2 waltz16  
 NUC2 1H  
 PCPD2 115.00 usec  
 PL2 0.00 dB  
 PL12 20.00 dB  
 PL13 20.00 dB  
 SF02 299.8711995 MHz

F2 - Processing parameters  
 SI 32768  
 SF 75.4023410 MHz  
 WDW EM  
 SSB 0  
 LB 1.00 Hz  
 GB 0  
 PC 1.40

1D NMR plot parameters  
 CX 20.00 cm  
 F1P 215.000 ppm  
 F1 16211.50 Hz  
 F2P -5.000 ppm  
 F2 -377.01 Hz  
 PPMCM 11.00000 ppm/cm  
 HZCM 529.42578 Hz/cm

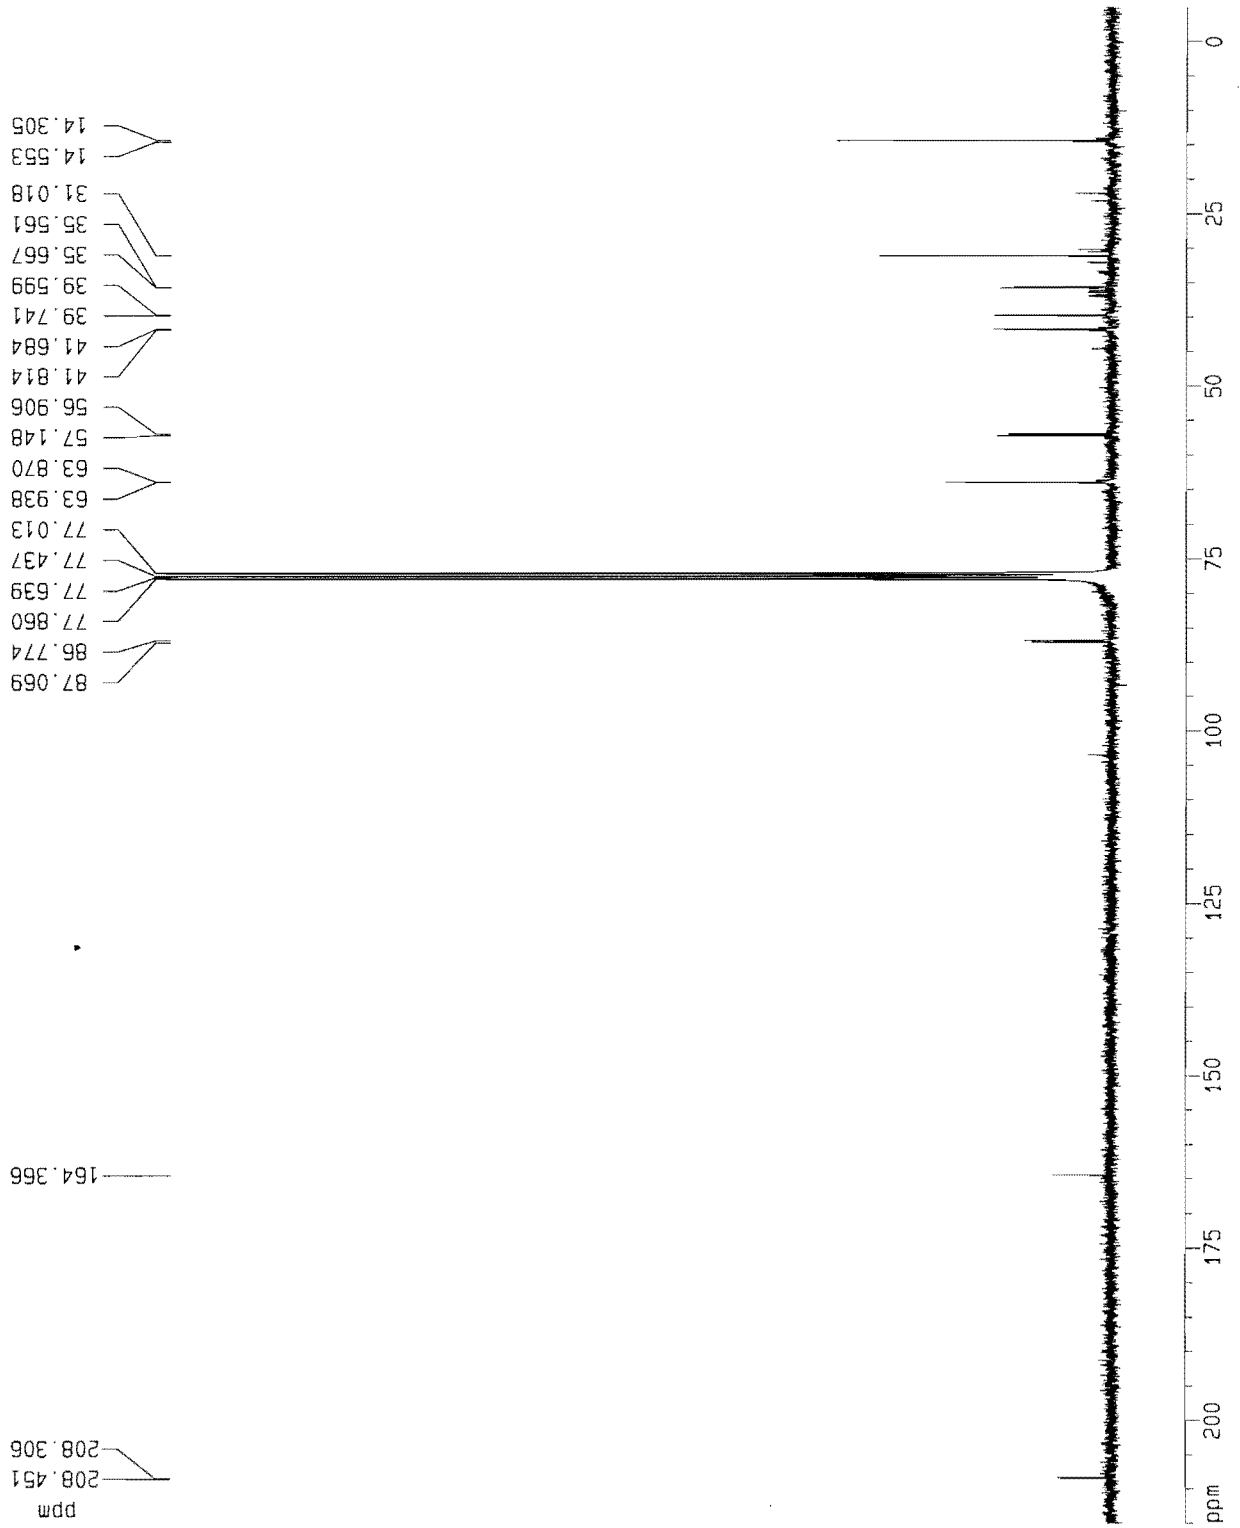

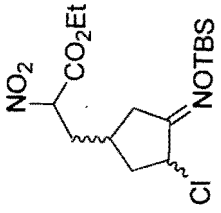

**18e**

Current Data Parameters  
 NAME Jul13-2010-wein  
 EXPNO 20  
 PROCNO 1

F2 - Acquisition Parameters

Date\_ 20100713  
 Time 12.34  
 INSTRUM spect  
 PROBHD 5 mm GNP 1H/1  
 PULPROG zg30  
 TD 65536  
 SOLVENT CDC13  
 NS 16  
 DS 2  
 SWH 6172.839 Hz  
 FIDRES 0.094190 Hz  
 AQ 5.3084660 sec  
 RG 512  
 DM 81.000 usec  
 DE 6.00 usec  
 TE 300.0 K  
 D1 1.00000000 sec

==== CHANNEL f1 =====

NUC1 1H  
 P1 11.70 usec  
 PL1 0.00 dB  
 SF01 299.8718518 MHz

F2 - Processing parameters

SI 32768  
 SF 299.8700586 MHz  
 WDW EM  
 SSB 0  
 LB 0.30 Hz  
 GB 0  
 PC 1.00

1D NMR plot parameters

CX 20.00 cm  
 F1P 11.000 ppm  
 F1 3298.57 Hz  
 F2P -1.000 ppm  
 F2 -299.87 Hz  
 PPMCM 0.60000 ppm/cm  
 HZCM 179.92203 Hz/cm

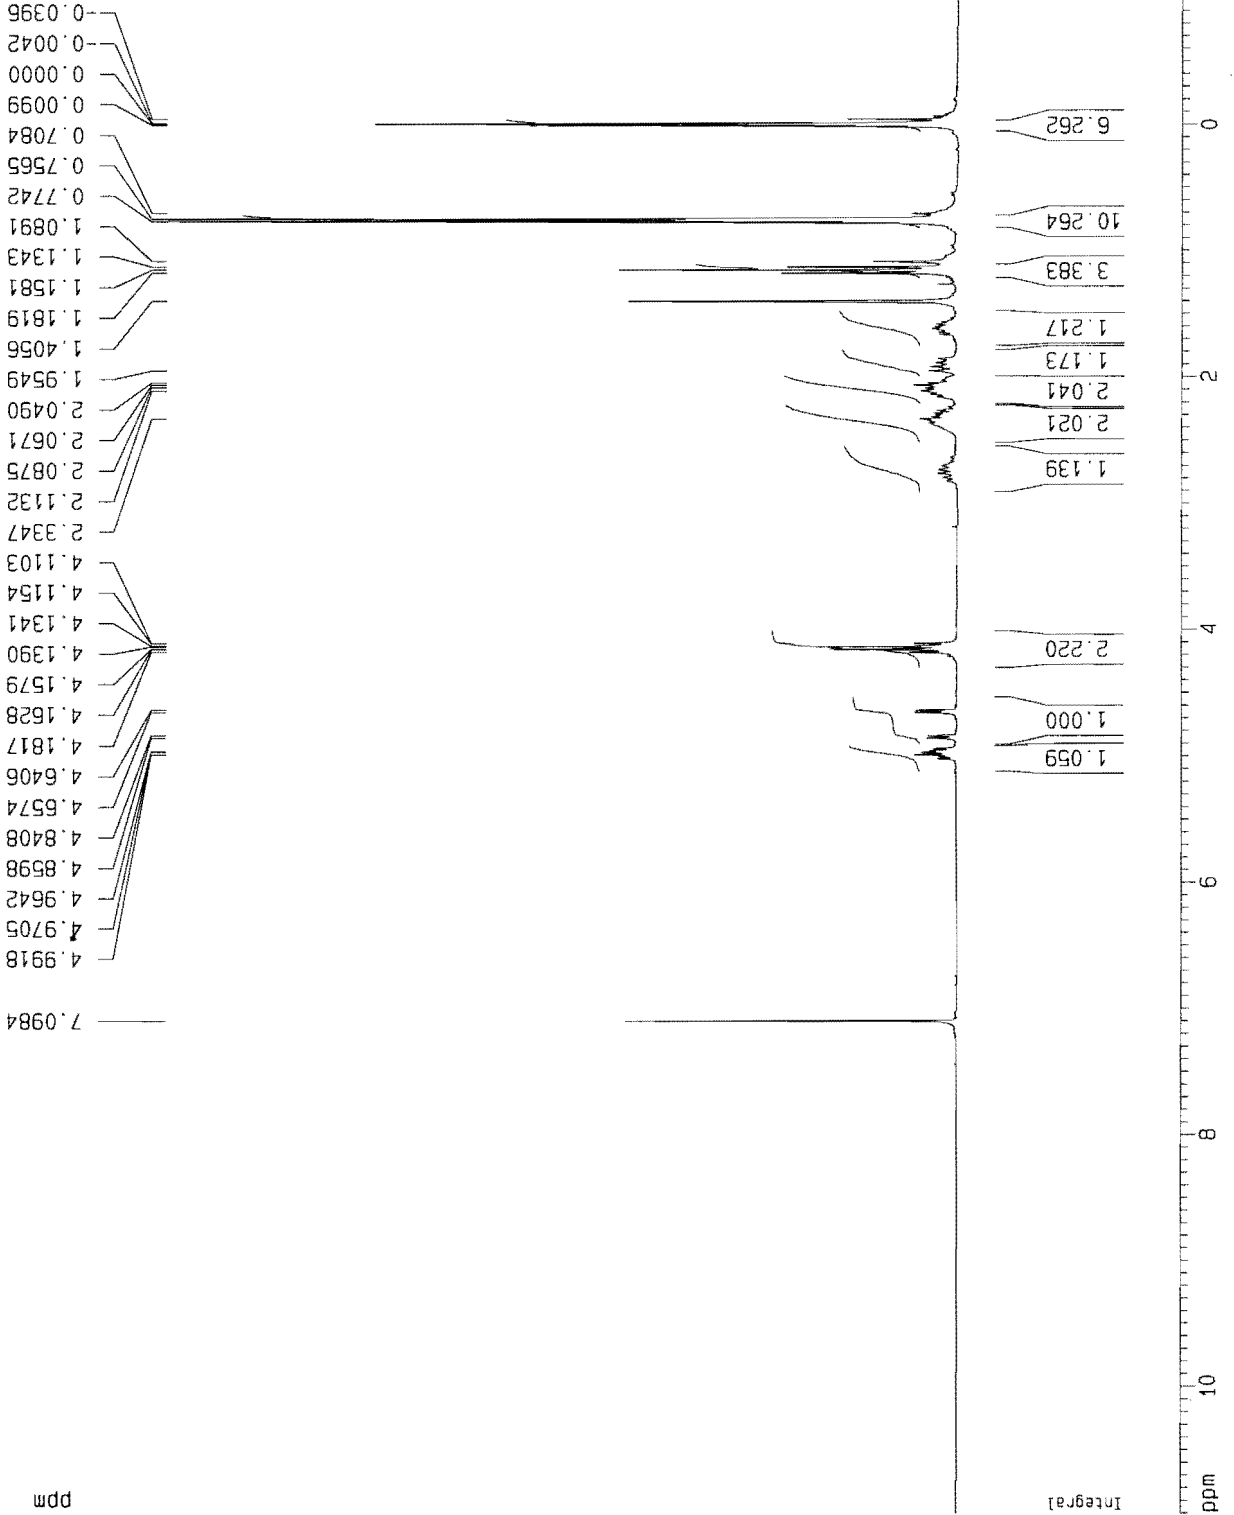

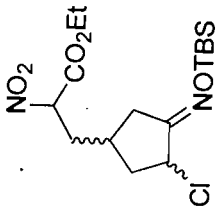

**18e**

Current Data Parameters  
 NAME Jul13-2010-Wein  
 EXPNO 40  
 PROCNO 1

F2 - Acquisition Parameters  
 Date\_ 20100713  
 Time 16.02  
 INSTRUM spect  
 PROBHO 5 mm QNP 1H/1  
 PULPROG zgpg30  
 TD 65536  
 SOLVENT CDC13  
 NS 2321  
 DS 4  
 SWH 18796.992 Hz  
 FIDRES 0.286819 Hz  
 AQ 1.7433076 sec  
 RG 1024  
 DM 26.600 usec  
 DE 6.00 usec  
 TE 300.0 K  
 D1 2.00000000 sec  
 D11 0.03000000 sec  
 D12 0.00002000 sec

===== CHANNEL f1 =====  
 NUC1 13C  
 P1 5.40 usec  
 PL1 -6.00 dB  
 SF01 75.4106357 MHz

===== CHANNEL f2 =====  
 CPDPRG2 waltz16  
 NUC2 1H  
 PCPD2 115.00 usec  
 PL2 0.00 dB  
 PL12 20.00 dB  
 PL13 20.00 dB  
 SF02 299.8711995 MHz

F2 - Processing parameters  
 SI 32768  
 SF 75.4023410 MHz  
 WDW EM  
 SSB 0  
 LB 1.00 Hz  
 GB 0  
 PC 1.40

1D NMR plot parameters  
 CX 20.00 cm  
 F1P 215.000 ppm  
 F1 16211.50 Hz  
 F2P -5.000 ppm  
 F2 -377.01 Hz  
 PPMCM 11.00000 ppm/cm  
 HZCM 829.42578 Hz/cm

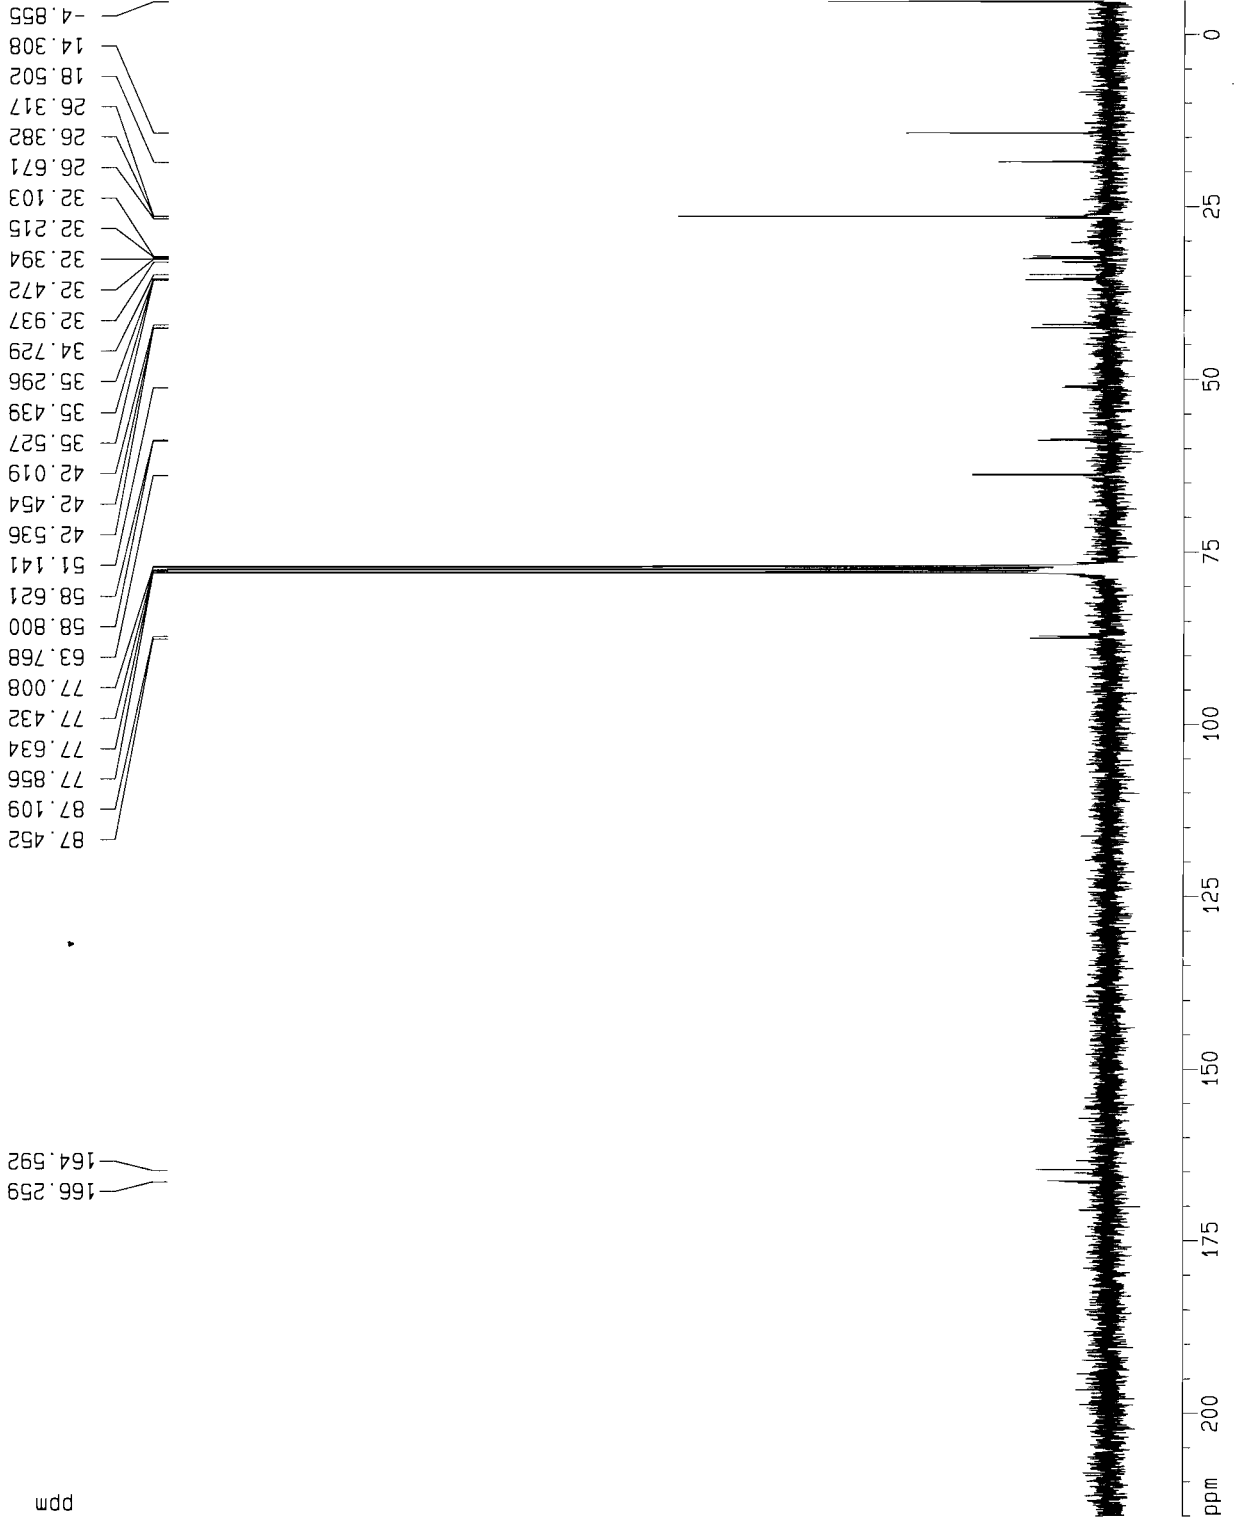

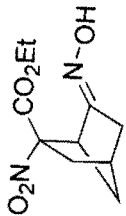

24a

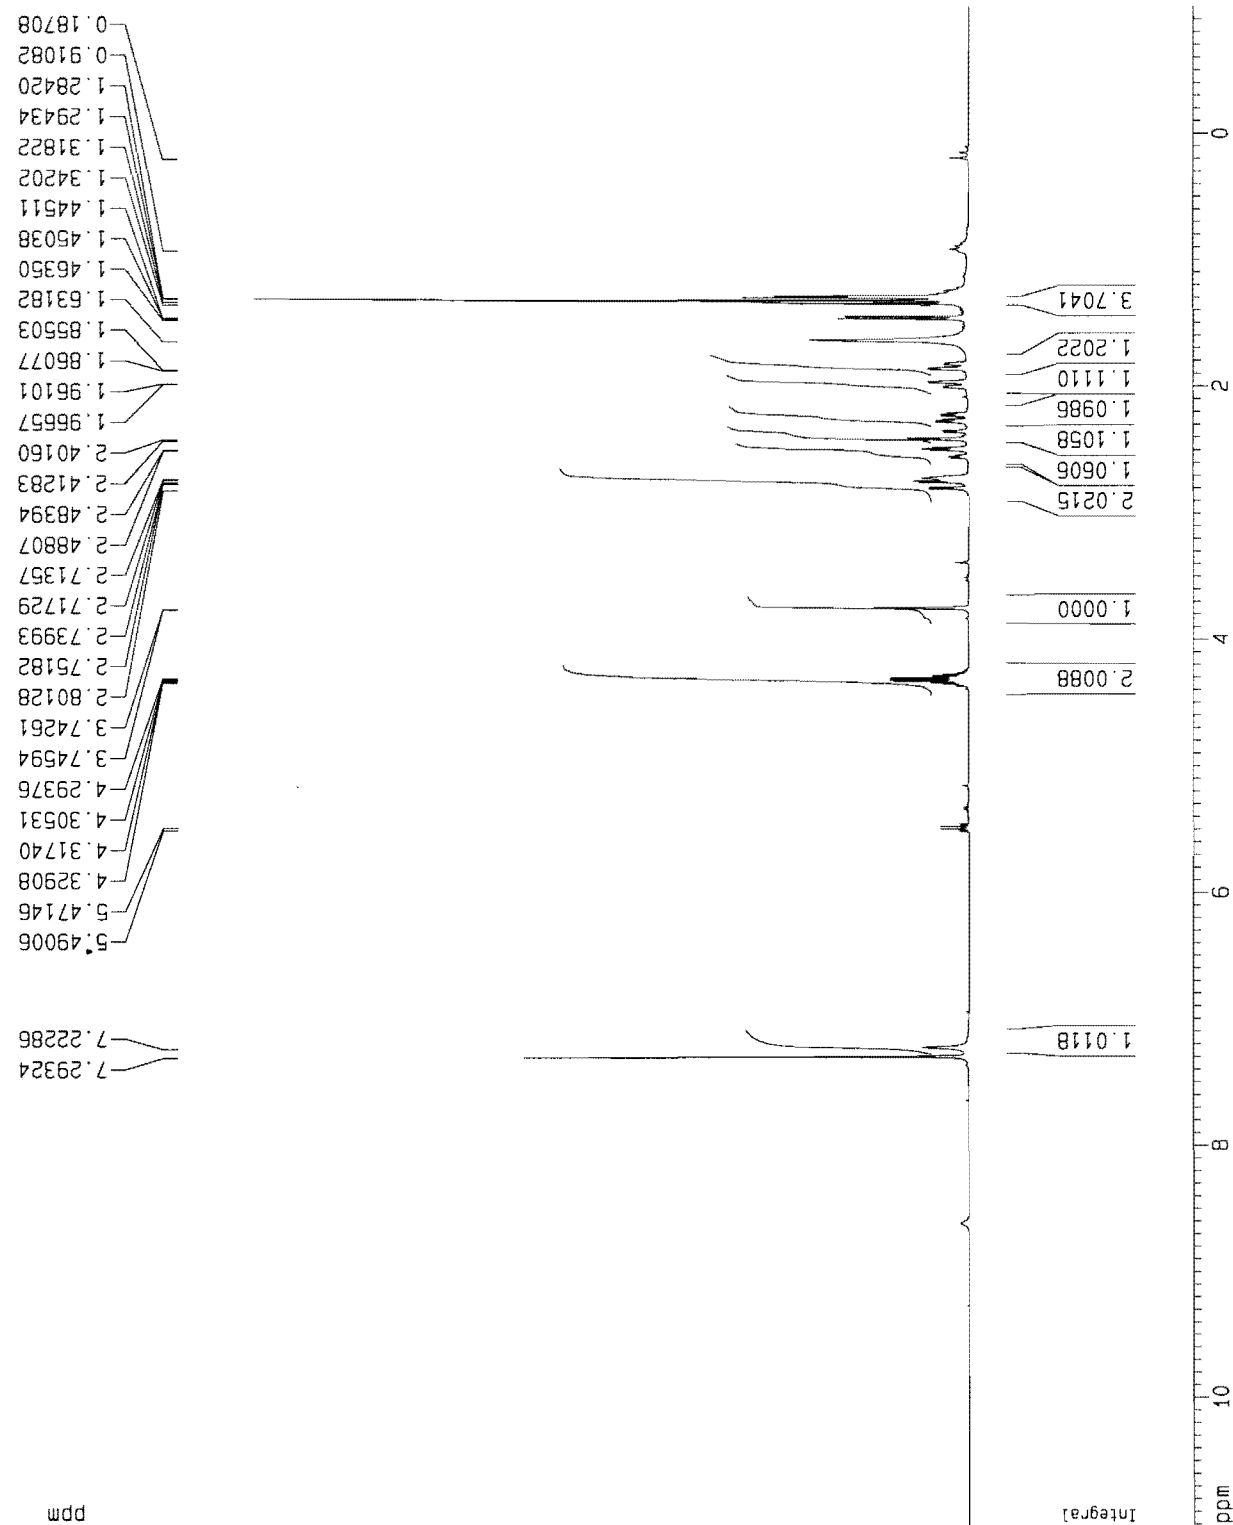

EXPNO 20  
PROCNO 1

F2 - Acquisition Parameters  
Date\_ 20100714  
Time 16.36  
INSTRUM spect  
PROBHD 5 mm QNP 1H/1  
PULPROG zg30  
TD 65536  
SOLVENT CDCl3  
NS 62  
DS 0  
SWH 6172.839 Hz  
FIDRES 0.094190 Hz  
AQ 5.3084660 sec  
RG 1024  
DM 81.000 usec  
DE 6.00 usec  
TE 300.0 K  
D1 2.0000000 sec

===== CHANNEL f1 =====  
NUC1 1H  
P1 11.70 usec  
PL1 0.00 dB  
SF01 299.8718518 MHz

F2 - Processing parameters  
SI 32768  
SF 299.8700000 MHz  
WDW EM  
SSB 0  
LB 0.30 Hz  
GB 0  
PC 1.00

1D NMR plot parameters  
CX 20.00 cm  
F1 11.000 ppm  
F1 3298.57 Hz  
F2 -1.000 ppm  
F2 -299.87 Hz  
PPMCM 0.60000 ppm/cm  
HZCM 179.92200 Hz/cm



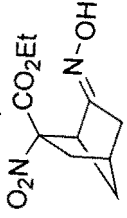

24a

Current Data Parameters  
 NAME Oct.31-2010-Wein  
 EXPNO 11  
 PROCNO 1

F2 - Acquisition Parameters  
 Date\_ 20101031  
 Time 17.57  
 INSTRUM spect  
 PROBHD 5 mm QNP 1H/1  
 PULPROG zgpg30  
 TD 65536  
 SOLVENT CDCl3  
 NS 13620  
 DS 4  
 SWH 18796.992 Hz  
 FIDRES 0.286819 Hz  
 AQ 1.7433076 sec  
 RG 1024  
 DW 25.600 usec  
 DE 6.00 usec  
 TE 300.0 K  
 D1 2.00000000 sec  
 D11 0.03000000 sec  
 D12 0.00002000 sec

===== CHANNEL f1 =====  
 NUC1 13C  
 P1 5.40 usec  
 PL1 -6.00 dB  
 SF01 75.4106357 MHz

===== CHANNEL f2 =====  
 CPOPRG2 waltz16  
 NUC2 1H  
 PCPD2 115.00 usec  
 PL2 0.00 dB  
 PL12 20.00 dB  
 PL13 20.00 dB  
 SF02 299.8711995 MHz

F2 - Processing parameters  
 SI 32768  
 SF 75.4023684 MHz  
 WDW EM  
 SSB 0  
 LB 1.00 Hz  
 GB 0  
 PC 1.40

10 NMR plot parameters  
 CX 20.00 cm  
 F1P 215.000 ppm  
 F1 16211.51 Hz  
 F2P -5.000 ppm  
 F2 -377.01 Hz  
 PPMCM 11.00000 ppm/cm  
 HZCM 829.42603 Hz/cm

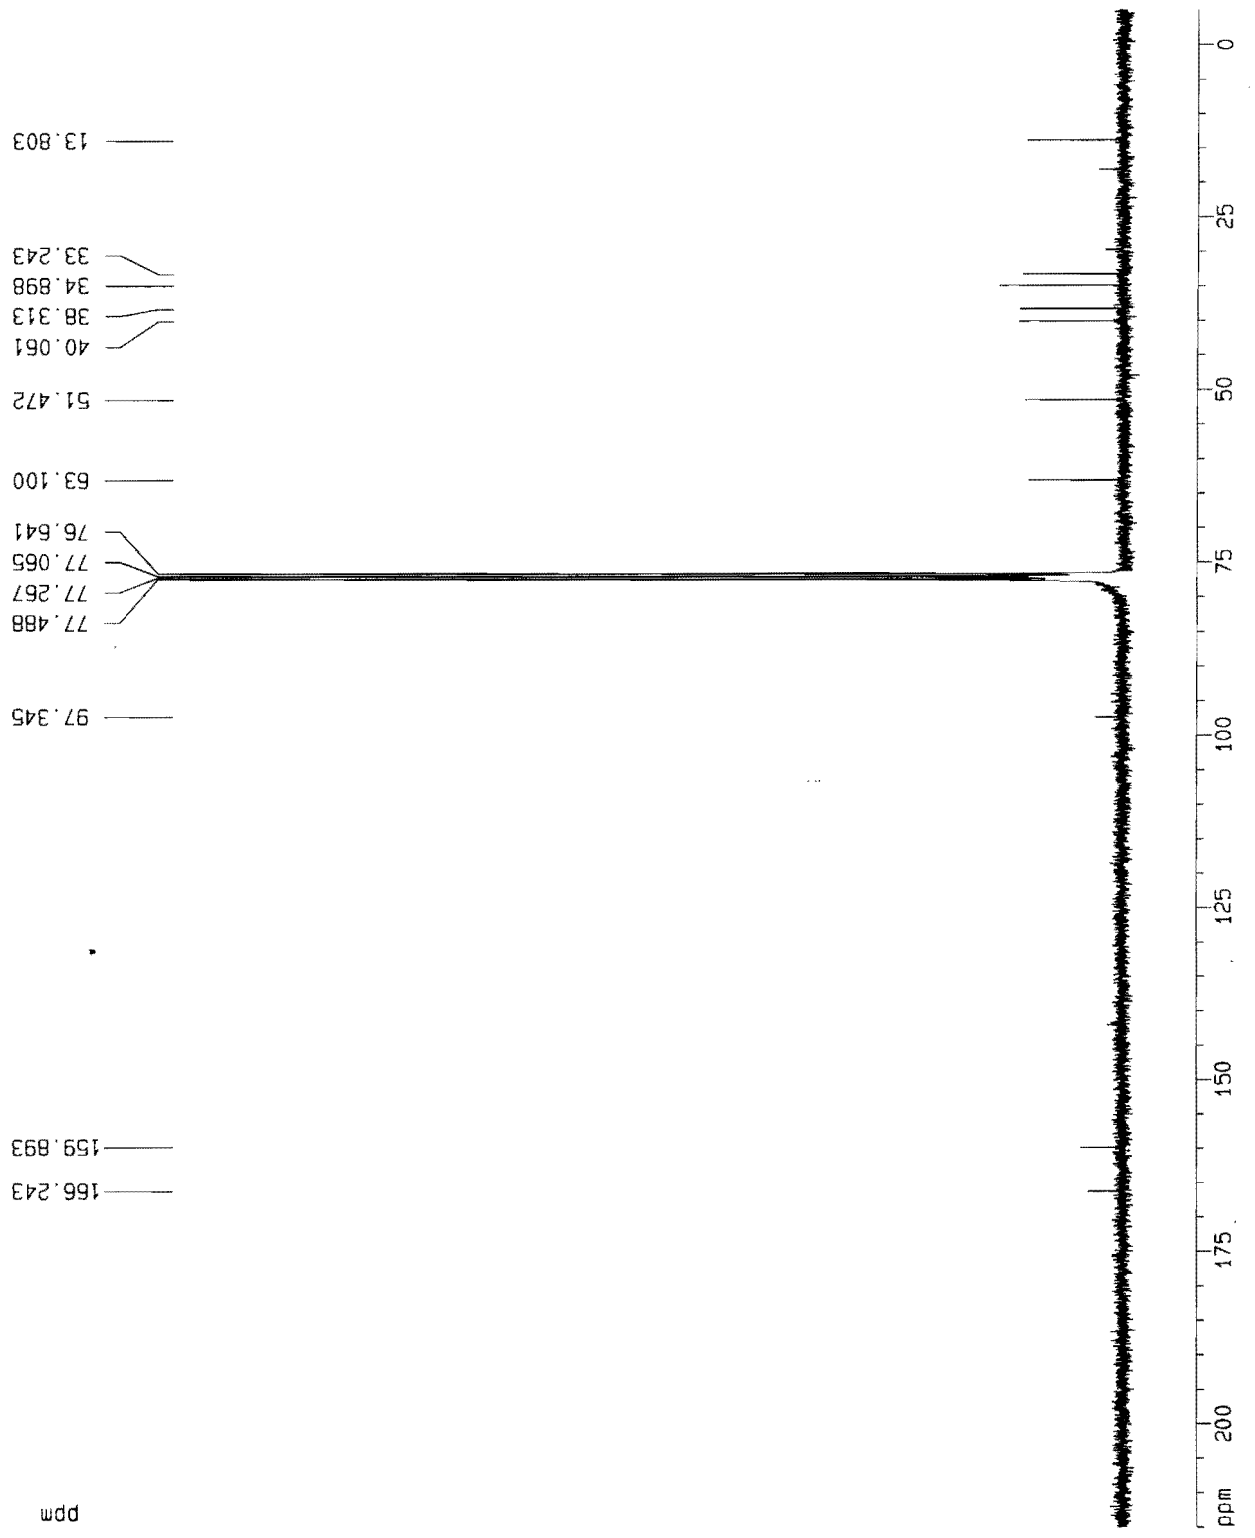

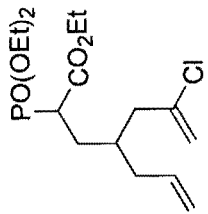

15f

Current Data Parameters  
 NAME Sep06-2010-Wein  
 EXPNO 10  
 PROCNO 1

F2 - Acquisition Parameters  
 Date\_ 20100906  
 Time 14.01  
 INSTRUM spect  
 PROBHD 5 mm QNP 1H/1  
 PULPROG zg30  
 TO 65536  
 SOLVENT CDCl3  
 NS 16  
 DS 2  
 SWH 6172.839 Hz  
 FIDRES 0.094190 Hz  
 AQ 5.3084660 sec  
 RG 35.9  
 DM 81.000 usec  
 DE 6.00 usec  
 TE 300.0 K  
 D1 1.0000000 sec

===== CHANNEL f1 =====  
 NUJC1 1H  
 P1 11.70 usec  
 PL1 0.00 dB  
 SF01 299.8718516 MHz

F2 - Processing parameters  
 SI 32768  
 SF 299.8700134 MHz  
 WDW EM  
 SSB 0  
 LB 0.30 Hz  
 GB 0  
 PC 1.00

1D NMR plot parameters  
 CX 20.00 cm  
 F1P 11.000 ppm  
 F1 3298.57 Hz  
 F2P -1.000 ppm  
 F2 -299.67 Hz  
 PPMCM 0.50000 ppm/cm  
 HZCM 179.92201 Hz/cm

0.00001  
 1.13629  
 1.15116  
 1.17582  
 1.19213  
 1.20483  
 1.21508  
 1.22881  
 1.23854  
 1.91360  
 1.93968  
 1.96046  
 1.98780  
 1.99510  
 2.01708  
 2.03936  
 2.07021  
 2.13676  
 2.16215  
 3.99327  
 4.01688  
 4.04087  
 4.05544  
 4.08980  
 4.11565  
 4.13740  
 4.92576  
 4.94106  
 4.96155  
 4.97794  
 5.04676  
 5.10026  
 5.59569  
 5.62523  
 7.24713

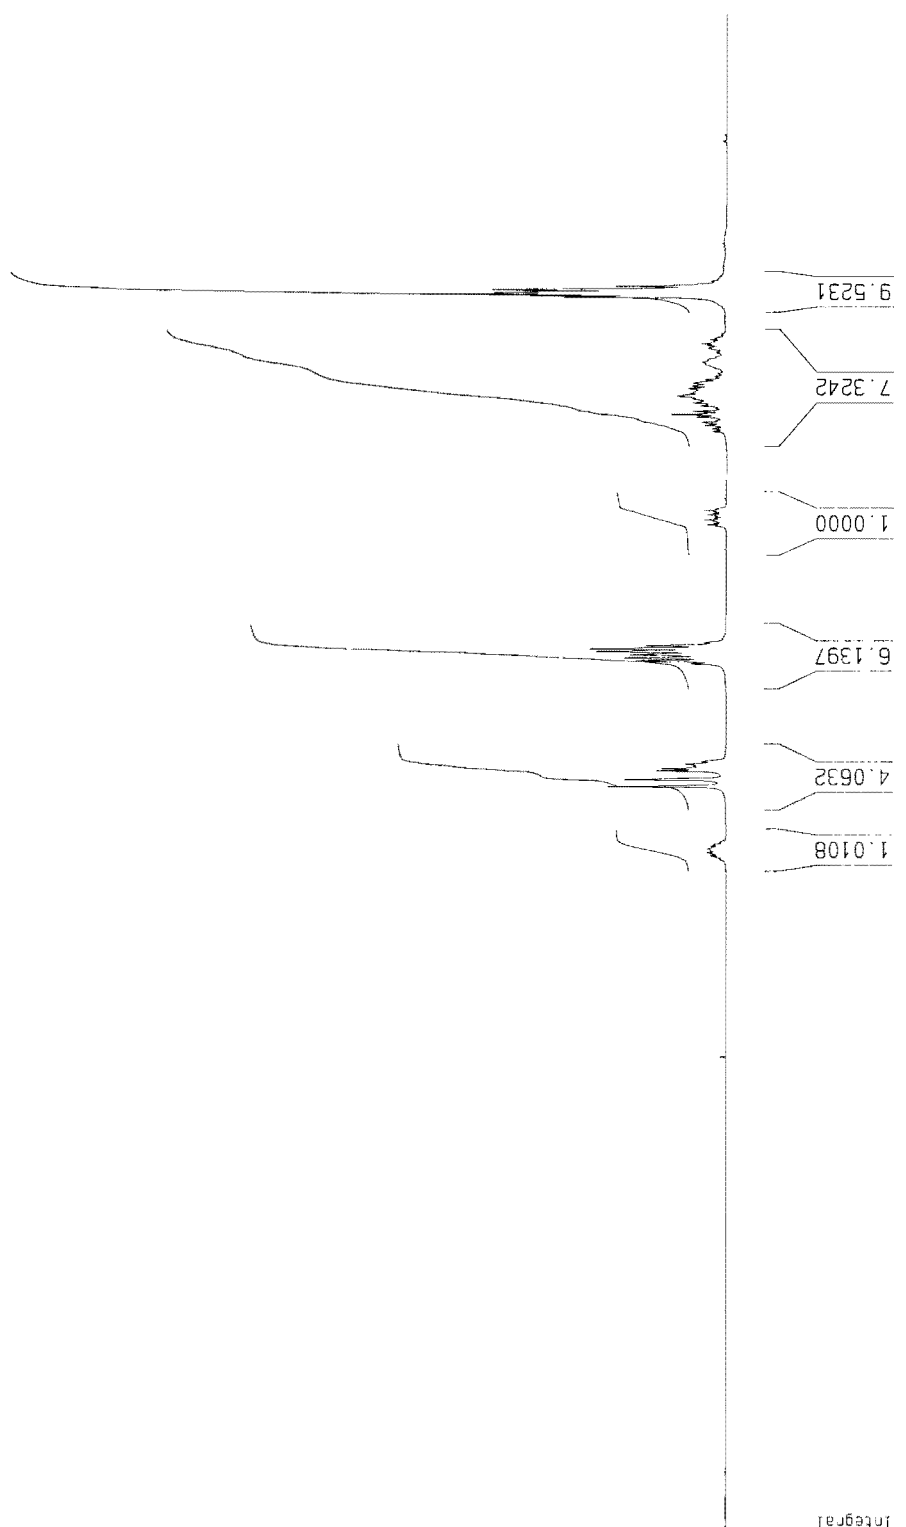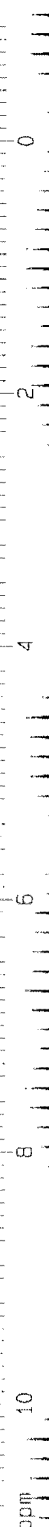

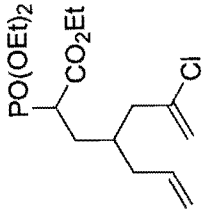

15f

Current Data Parameters  
 NAME Sep05-2010-Wein  
 EXPNO 12  
 PROCNO 1

F2 - Acquisition Parameters  
 Date\_ 20100906  
 Time 14.13  
 INSTRUM spect  
 PROBHD 5 mm QNP 1H/1  
 PULPROG zgpg30  
 TD 65536  
 SOLVENT CDC13  
 NS 520  
 DS 4  
 SWH 18795.992 Hz  
 FIDRES 0.286819 Hz  
 AQ 1.7433076 sec  
 RG 1024  
 DW 26.600 USEC  
 DE 6.00 USEC  
 TE 300.0 K  
 D1 2.00000000 sec  
 D11 0.03000000 sec  
 D12 0.00002000 sec

===== CHANNEL f1 =====  
 NUC1 13C  
 P1 5.40 USEC  
 PL1 -6.00 dB  
 SFO1 75.4106357 MHz

===== CHANNEL f2 =====  
 CQPRG2 waltz16  
 NUC2 1H  
 PCPD2 115.00 usec  
 PL2 0.00 dB  
 PL12 20.00 dB  
 PL13 20.00 dB  
 SFO2 299.8711995 MHz

F2 - Processing parameters  
 SI 32768  
 SF 75.4023410 MHz  
 WDW EM  
 SSB 0  
 LB 1.00 Hz  
 GB 0  
 PC 1.40

1D NMR plot parameters  
 CX 20.00 cm  
 F1P 215.000 ppm  
 F1 16211.50 Hz  
 F2P -5.000 ppm  
 F2 -377.01 Hz  
 PPMCM 11.00000 ppm/cm  
 HZCM 829.42576 Hz/cm

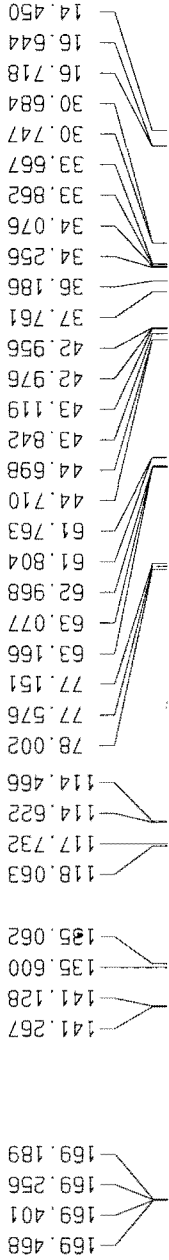

ppm

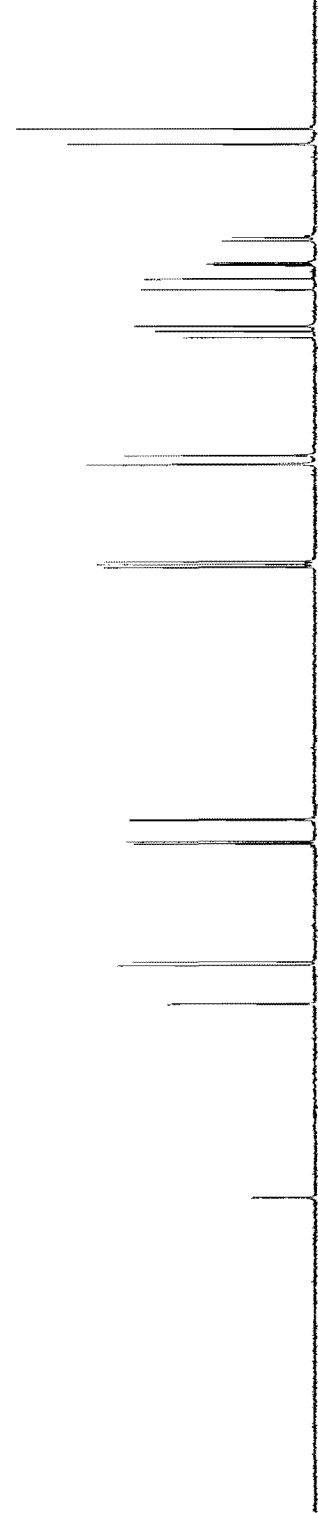

ppm

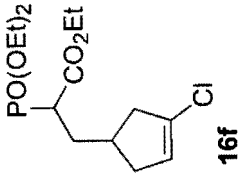

Current Data Parameters  
 NAME Sep09-2010-Wein  
 EXPNO 90  
 PROCNO 1

F2 - Acquisition Parameters  
 Date\_ 20100909  
 Time 18.15  
 INSTRUM spect  
 PROBHD 5 mm QNP 1H/1  
 PULPROG zg30  
 TD 65536  
 SOLVENT CDCl<sub>3</sub>  
 NS 16  
 DS 2  
 SWH 6172.839 Hz  
 FIDRES 0.094190 Hz  
 AQ 5.3084660 sec  
 RG 80.5  
 DM 81.000 usec  
 DE 6.00 usec  
 TE 300.0 K  
 D1 1.00000000 sec

===== CHANNEL f1 =====  
 NUC1 1H  
 P1 11.70 usec  
 PL1 0.00 dB  
 SF01 299.8718518 MHz

F2 - Processing parameters  
 SI 32768  
 SF 299.8700071 MHz  
 WDW EM  
 SSB 0  
 LB 0.30 Hz  
 GB 0  
 PC 1.00

1D NMR plot parameters  
 CX 20.00 cm  
 F1P 11.000 ppm  
 F1 3298.57 Hz  
 F2P -1.000 ppm  
 F2 -299.87 Hz  
 PPMCM 0.60000 ppm/cm  
 HZCM 179.92200 Hz/cm

1.22877  
 1.24527  
 1.26923  
 1.28349  
 1.29083  
 1.30681  
 1.31165  
 1.33023  
 1.87944  
 1.91236  
 2.02380  
 2.03323  
 2.04237  
 2.15133  
 2.17029  
 2.17990  
 2.21746  
 4.07197  
 4.07834  
 4.09603  
 4.12051  
 4.13837  
 4.14438  
 4.16156  
 4.18457  
 4.20747  
 4.23098  
 5.55088  
 5.55573  
 7.26828

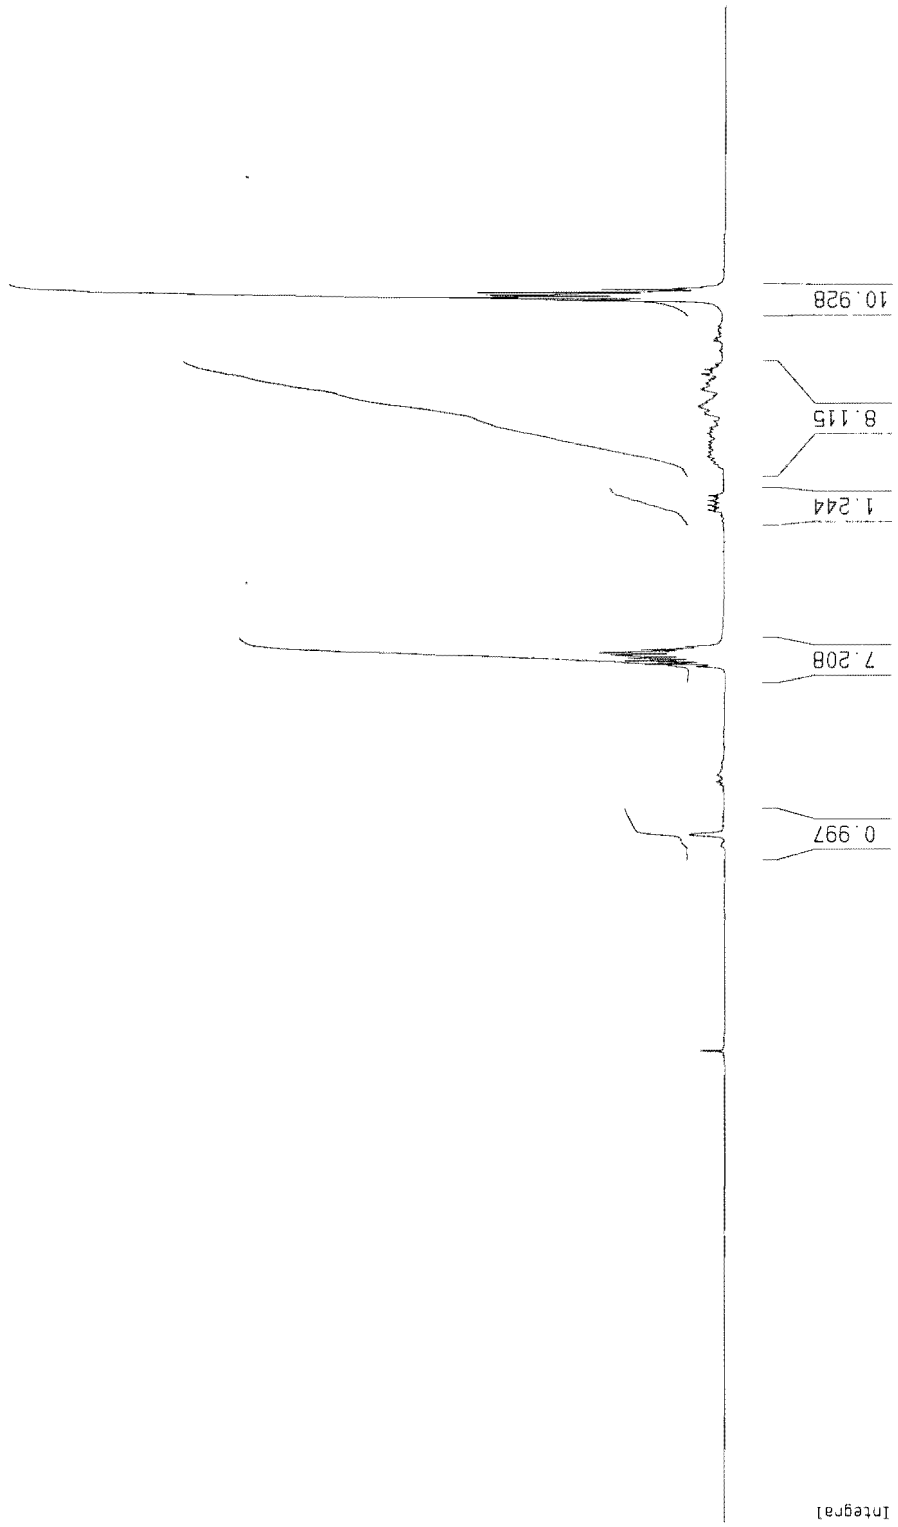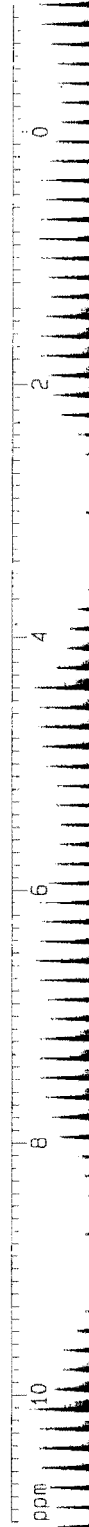

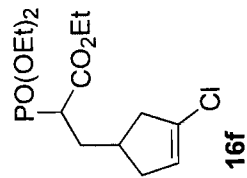

Current Data Parameters  
 NAME Sep09-2010-Wein  
 EXPNO 92  
 PROCNO 1

F2 - Acquisition Parameters  
 Date\_ 20100909  
 Time 20.03  
 INSTRUM spect  
 PROBHD 5 mm QNP 1H/1  
 PULPROG zgpg30  
 TD 65536  
 SOLVENT CDC13  
 NS 1532  
 DS 4  
 SWH 16796.992 Hz  
 FIDRES 0.286619 Hz  
 AQ 1.743076 sec  
 RG 1024  
 DM 26.600 usec  
 DE 6.00 usec  
 TE 300.0 K  
 D1 2.00000000 sec  
 D11 0.03000000 sec  
 D12 0.00002000 sec

==== CHANNEL f1 =====  
 NUC1 13C  
 P1 5.40 usec  
 PL1 -6.00 dB  
 SF01 75.4106357 MHz

==== CHANNEL f2 =====  
 CPDPRG2 waltz16  
 NUC2 1H  
 PCPD2 115.00 usec  
 PL2 0.00 dB  
 PL12 20.00 dB  
 PL13 20.00 dB  
 SF02 299.6711995 MHz

F2 - Processing parameters  
 SI 32768  
 SF 75.4023758 MHz  
 WDW EM  
 SSB 0  
 LB 1.00 Hz  
 GB 0  
 PC 1.40

1D NMR plot parameters  
 CX 20.00 cm  
 F1P 215.000 ppm  
 F1 16211.51 Hz  
 F2P -5.000 ppm  
 F2 -377.01 Hz

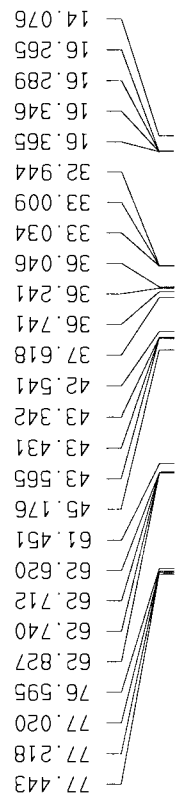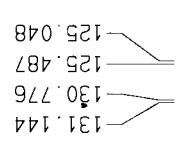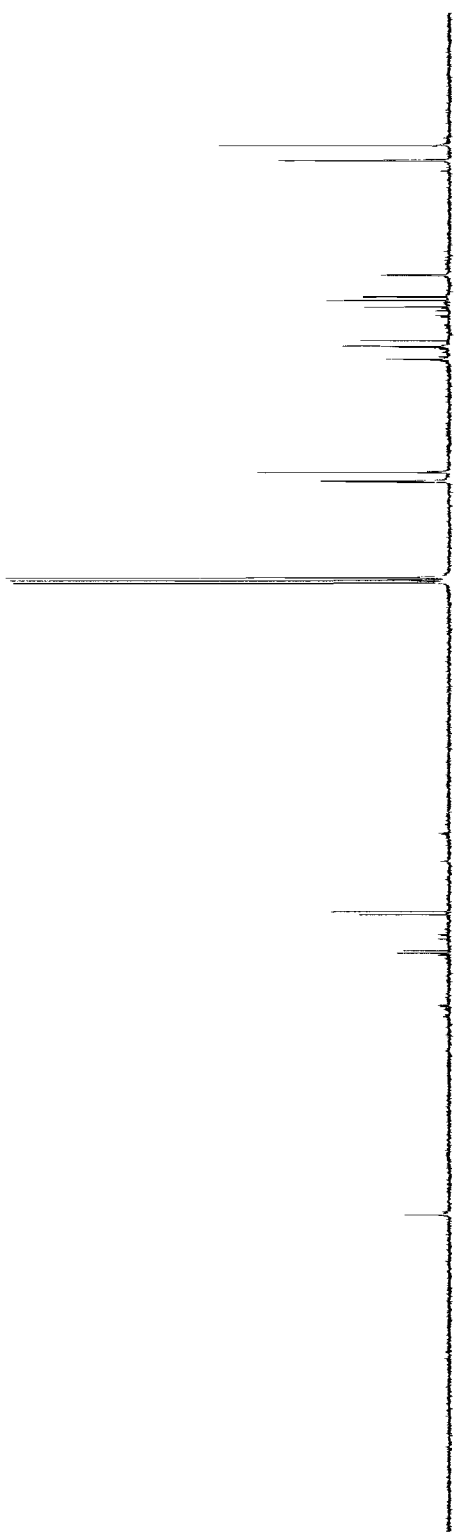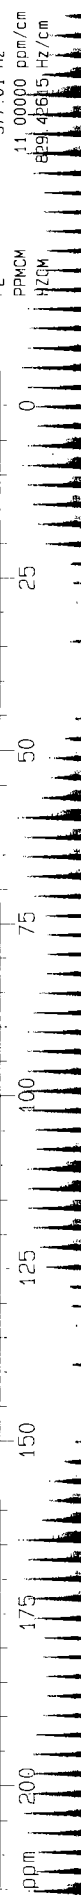

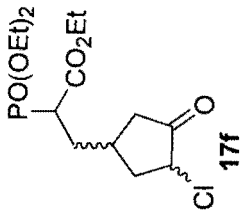

Current Data Parameters  
 NAME Sep13-2010-Wein  
 EXPNO 10  
 PROCNO 1

F2 - Acquisition Parameters  
 Date\_ 20100913  
 Time 18.54  
 INSTRUM spect  
 PROBHD 5 mm GNP 1H/1  
 PULPROG zg30  
 TD 65536  
 SOLVENT CDCl3  
 NS 16  
 DS 2  
 SWH 6172.839 Hz  
 FIDRES 0.094190 Hz  
 AQ 5.3084660 sec  
 RG 256  
 DW 81.000 usec  
 DE 6.00 usec  
 TE 300.0 K  
 D1 1.0000000 sec

===== CHANNEL f1 =====  
 NUC1 1H  
 P1 11.70 usec  
 PL1 0.00 dB  
 SF01 299.6718518 MHz

F2 - Processing parameters  
 SI 32768  
 SF 299.6700098 MHz  
 WDW EM  
 SSB 0  
 LB 0.30 Hz  
 GB 0  
 PC 1.00

1D NMR plot parameters  
 CX 20.00 cm  
 F1P 11.000 ppm  
 F1 3298.57 Hz  
 F2P -1.000 ppm  
 F2 -299.67 Hz  
 PPMCM 0.60000 ppm/cm  
 HZCM 179.92200 Hz/cm

7.25994  
 4.26294  
 4.24905  
 4.23937  
 4.22453  
 4.21566  
 4.20294  
 4.18606  
 4.18083  
 4.16185  
 4.15879  
 4.13769  
 4.11384  
 1.96033  
 1.93843  
 1.92531  
 1.91154  
 1.90795  
 1.89540  
 1.8545  
 1.84507  
 1.83196  
 1.82150  
 1.80881  
 1.29757  
 1.29324  
 1.27957  
 1.26932

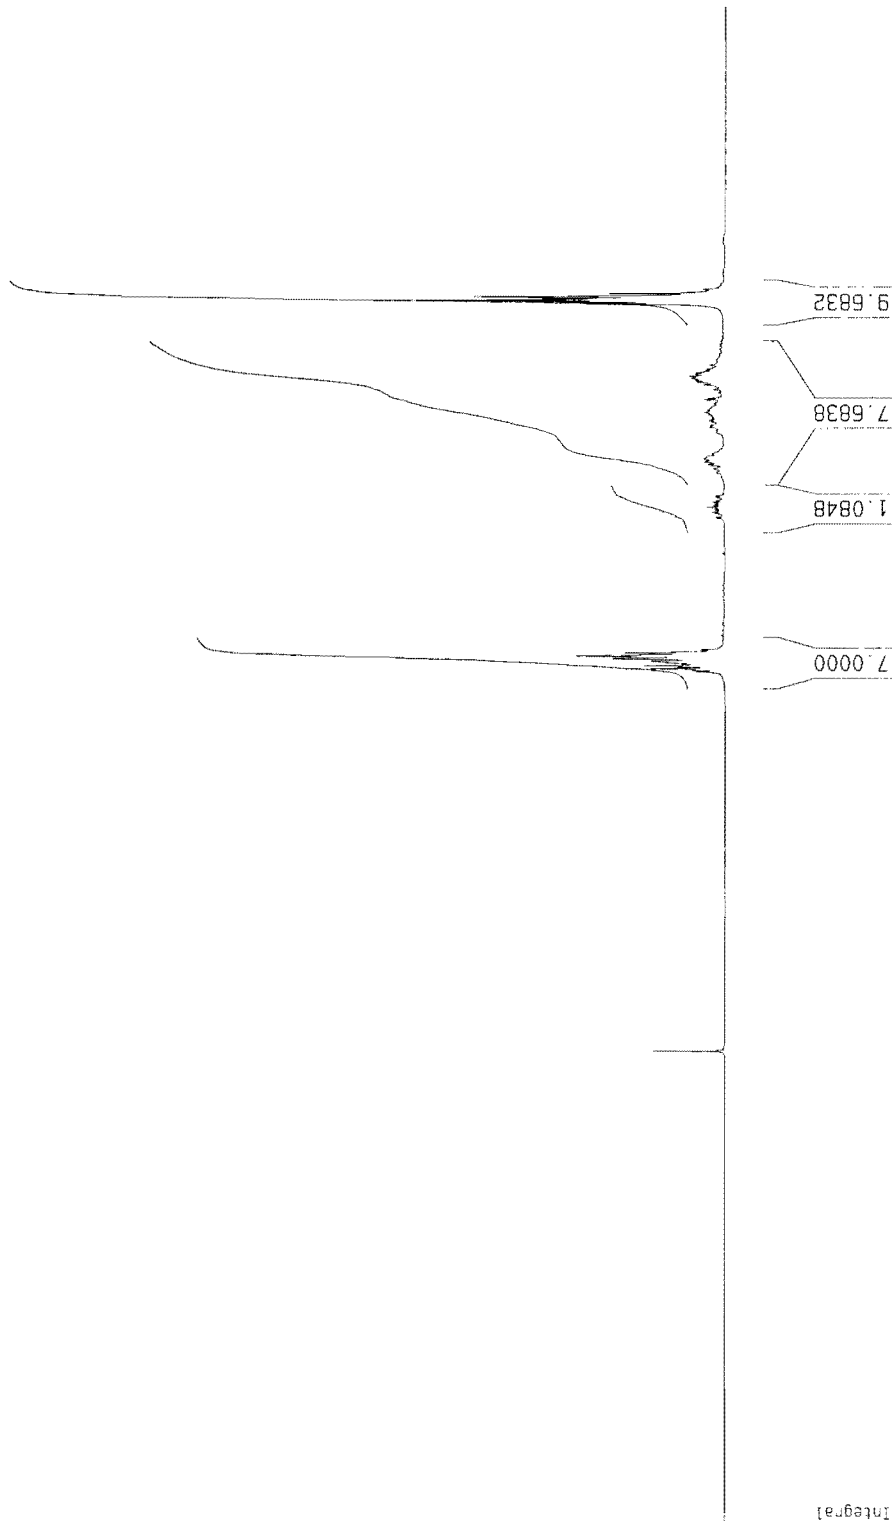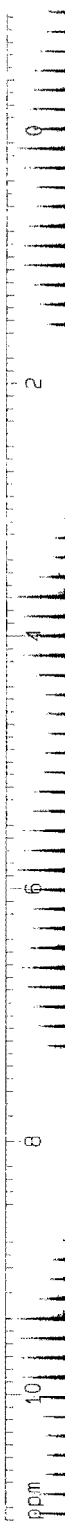

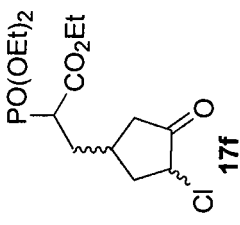

Current Data Parameters  
 NAME Sep13-2010-Wein  
 EXPNO 12  
 PROCNO 1

F2 - Acquisition Parameters  
 Date\_ 20100913  
 Time 20:27  
 INSTRUM spect  
 PRDBHD 5 mm QNP 1H/1  
 PULPROG zgpg30  
 TD 65536  
 SOLVENT CDC13  
 NS 12717  
 DS 4  
 SWH 18796.992 Hz  
 FIDRES 0.286619 Hz  
 AQ 1.7433076 sec  
 RG 4096  
 DM 26.600 usec  
 DE 6.00 usec  
 TE 300.0 K  
 D1 2.00000000 sec  
 D11 0.03000000 sec  
 D12 0.00000000 sec

===== CHANNEL f1 =====  
 NUC1 13C  
 P1 5.40 usec  
 PL1 -6.00 dB  
 SFO1 75.4106357 MHz

===== CHANNEL f2 =====  
 CPDPRG2 waltz16  
 NUC2 1H  
 PCPD2 115.00 usec  
 PL2 0.00 dB  
 PL12 20.00 dB  
 PL13 20.00 dB  
 SFO2 299.8711995 MHz

F2 - Processing parameters  
 SI 32768  
 SF 75.4023747 MHz  
 WDW EM  
 SSB 0  
 LB 1.00 Hz  
 GB 0  
 PC 1.40

1D NMR plot parameters  
 CX 20.00 cm  
 F1P 215.000 ppm  
 F1 16211.51 Hz  
 F2P -5.000 ppm  
 F2 -377.01 Hz  
 PPMCM 11.00000 ppm/cm  
 HZCM 829.42615 Hz/cm

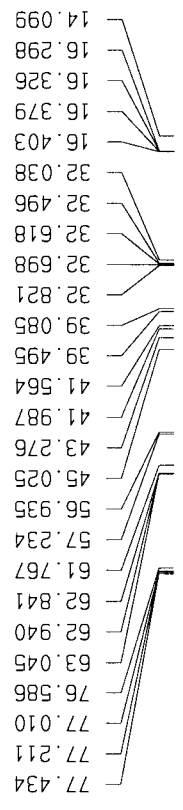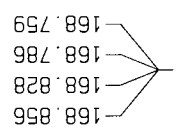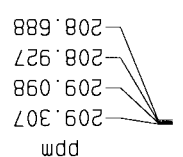

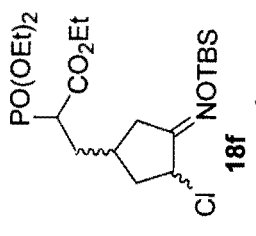

Current Data Parameters  
 NAME Sep15-2010-Wein  
 EXPNO 10  
 PROCNO 1

F2 - Acquisition Parameters  
 Date\_ 20100915  
 Time 15.53  
 INSTRUM spect  
 PROBHD 5 mm QNP 1H/1  
 PULPROG zg30  
 TD 65536  
 SOLVENT CDCl3  
 NS 16  
 DS 2  
 SWH 6172.839 Hz  
 FIDRES 0.094190 Hz  
 AQ 5.3084660 sec  
 RG 267.4  
 DW 81.000 usec  
 DE 6.00 usec  
 TE 300.0 K  
 D1 1.00000000 sec

\*\*\*\*\* CHANNEL f1 \*\*\*\*\*  
 NUC1 1H  
 P1 11.70 usec  
 PL1 0.00 dB  
 SF01 299.8718518 MHz

F2 - Processing parameters  
 SI 32768  
 SF 299.8700101 MHz  
 WDW EM  
 SSB 0  
 LB 0.30 Hz  
 GB 0  
 PC 1.00

1D NMR plot parameters  
 CX 20.00 cm  
 F1P 11.000 ppm  
 F1 3298.57 Hz  
 F2P -1.000 ppm  
 F2 -299.87 Hz  
 PPMCM 0.60000 ppm/cm  
 HZCM 179.92200 Hz/cm

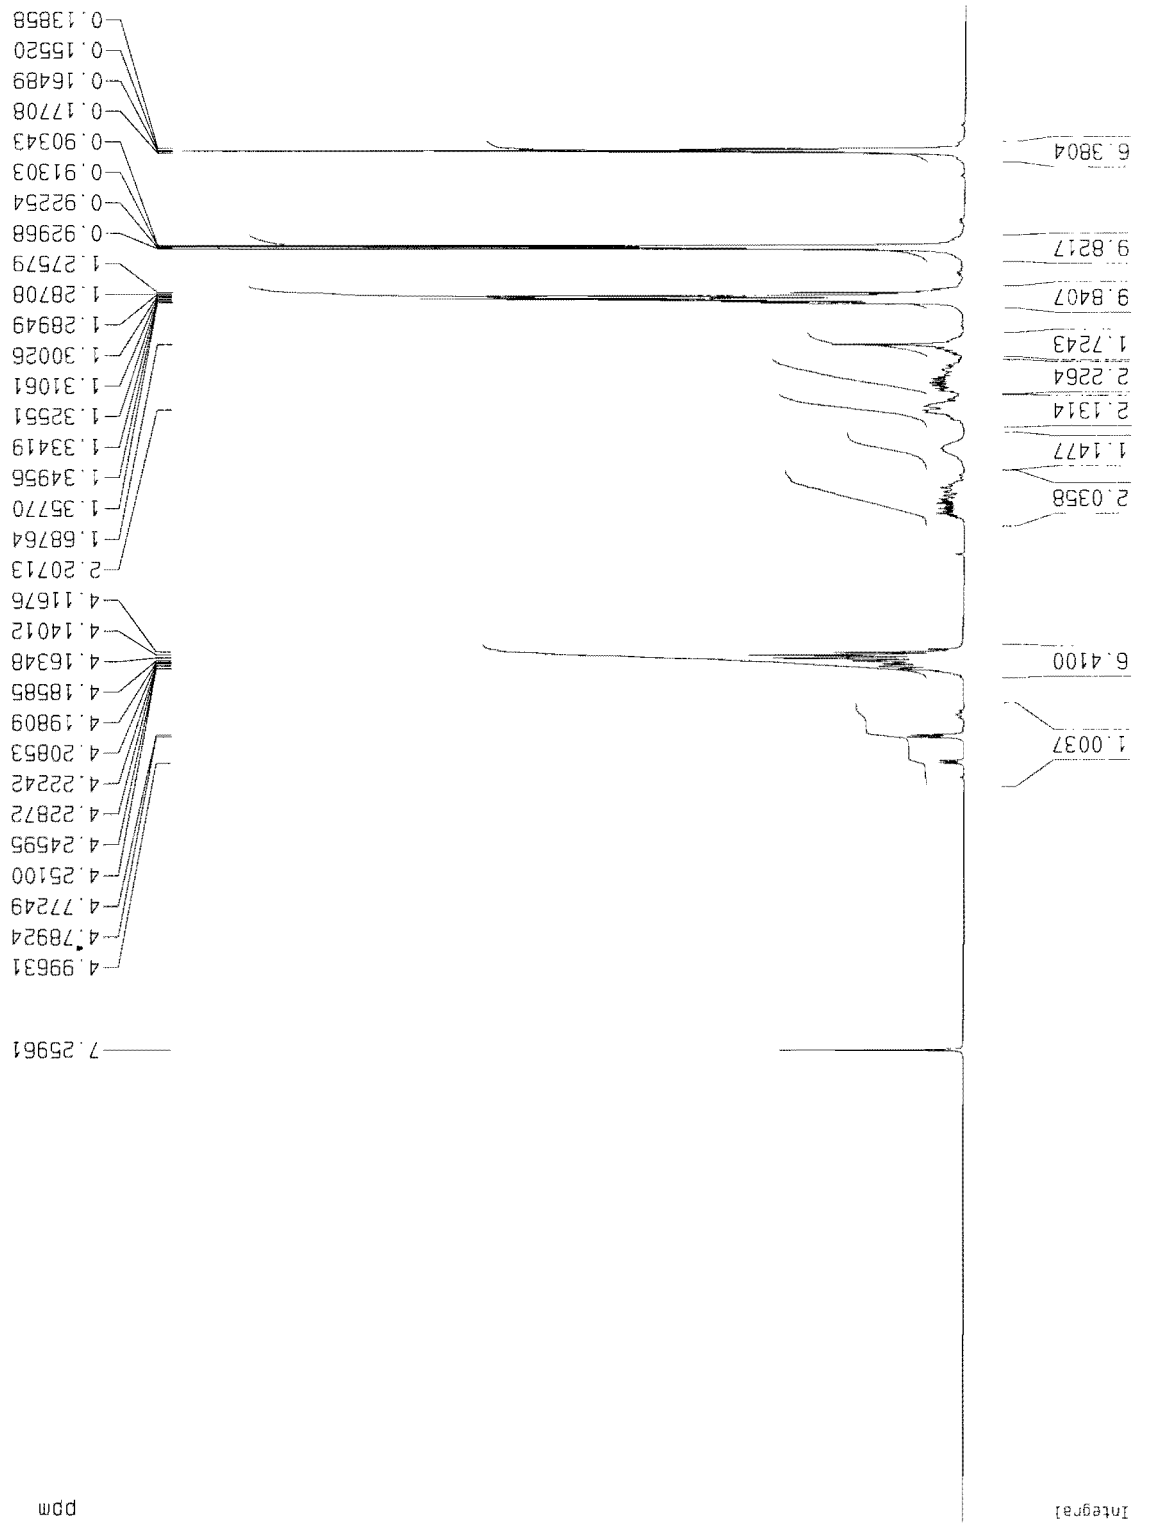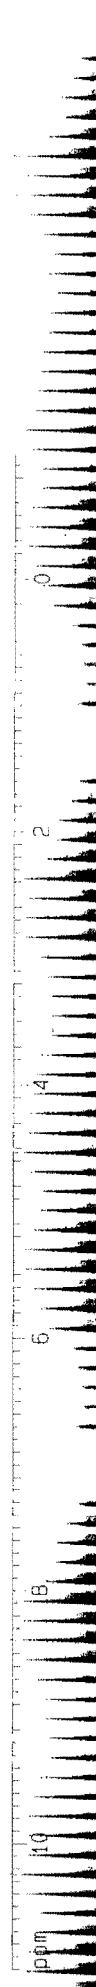



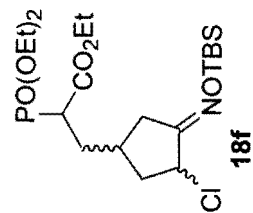

Current Data Parameters  
 NAME Sep15-2010-wein  
 EXPNO 12  
 PROCNO 1

F2 - Acquisition Parameters  
 Date\_ 20100915  
 Time 16.54  
 INSTRUM spect  
 PROBHID 5 mm GNP 1H/1  
 PULPROG zgpg30  
 TO 65536  
 SOLVENT CDCl3  
 NS 1674  
 DS 4  
 SWH 18796.982 Hz  
 FIDRES 0.286819 Hz  
 AQ 1.7433076 sec  
 RG 1024  
 DK 26.600 usec  
 DE 6.00 usec  
 TE 300.0 K  
 D1 2.00000000 sec  
 D11 0.03000000 sec  
 D12 0.00002000 sec

\*\*\*\*\* CHANNEL f1 \*\*\*\*\*  
 NU1 13C  
 P1 5.40 usec  
 PL1 -6.00 dB  
 SF01 75.4106357 MHz

\*\*\*\*\* CHANNEL f2 \*\*\*\*\*  
 CPDPRG2 waltz16  
 NU2 1H  
 PCPD2 115.00 usec  
 PL2 0.00 dB  
 PL12 20.00 dB  
 PL13 20.00 dB  
 SF02 299.8711995 MHz

F2 - Processing parameters  
 SI 32768  
 SF 75.4023707 MHz  
 WDW EM  
 SSB 0  
 LB 1.00 Hz  
 GB 0  
 PC 1.40

1D NMR plot parameters  
 CX 20.00 cm  
 F1P 200.000 ppm  
 F1 15080.47 Hz  
 F2P -15.000 ppm  
 F2 -1131.04 Hz

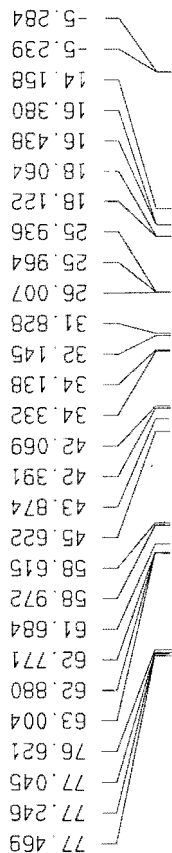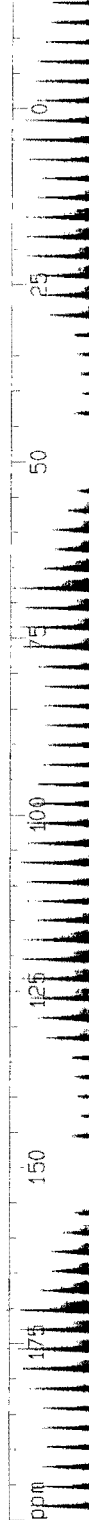

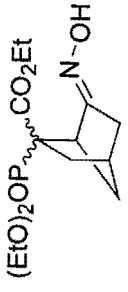

26

Current Data Parameters

NAME Sep17-2010-MAIN  
 EXPNO 30  
 PROCNO 1

F2 - Acquisition Parameters

Date\_ 20100917  
 Time 19.03  
 INSTRUM spect  
 PROBHD 5 mm QNP 1H/1  
 PULPROG zg30  
 TD 65536  
 SOLVENT CDC13  
 NS 16  
 DS 2  
 SWH 6172.839 Hz  
 FIDRES 0.094190 Hz  
 AQ 5.3084660 sec  
 RG 456.1  
 DW 81.000 usec  
 DE 6.00 usec  
 TE 300.0 K  
 D1 1.00000000 sec

CHANNEL f1

NUC1 1H  
 P1 11.70 usec  
 PL1 0.00 dB  
 SFO1 299.8718516 MHz

F2 - Processing parameters

SI 32768  
 SF 299.8700102 MHz  
 WDW EM  
 SSB 0  
 LB 0.30 Hz  
 GB 0  
 PC 1.00

1D NMR plot parameters

CX 20.00 cm  
 F1P 11.000 ppm  
 F1 3298.57 Hz  
 F2P -1.000 ppm  
 F2 -299.87 Hz  
 PPMCM 0.50000 ppm/cm  
 HZCM 179.92200 Hz/cm

- 0.06148
- 0.90791
- 1.23686
- 1.26104
- 1.28804
- 1.30203
- 1.31167
- 1.32655
- 1.35014
- 1.37359
- 1.49119
- 2.11922
- 2.28004
- 2.31665
- 2.32304
- 2.60607
- 3.37969
- 3.40647
- 4.07237
- 4.09623
- 4.12046
- 4.13356
- 4.14486
- 4.15748
- 4.16876
- 4.18176
- 4.20676
- 4.21867
- 4.23056
- 5.11045

- 7.26000
- 7.83162
- 9.35872

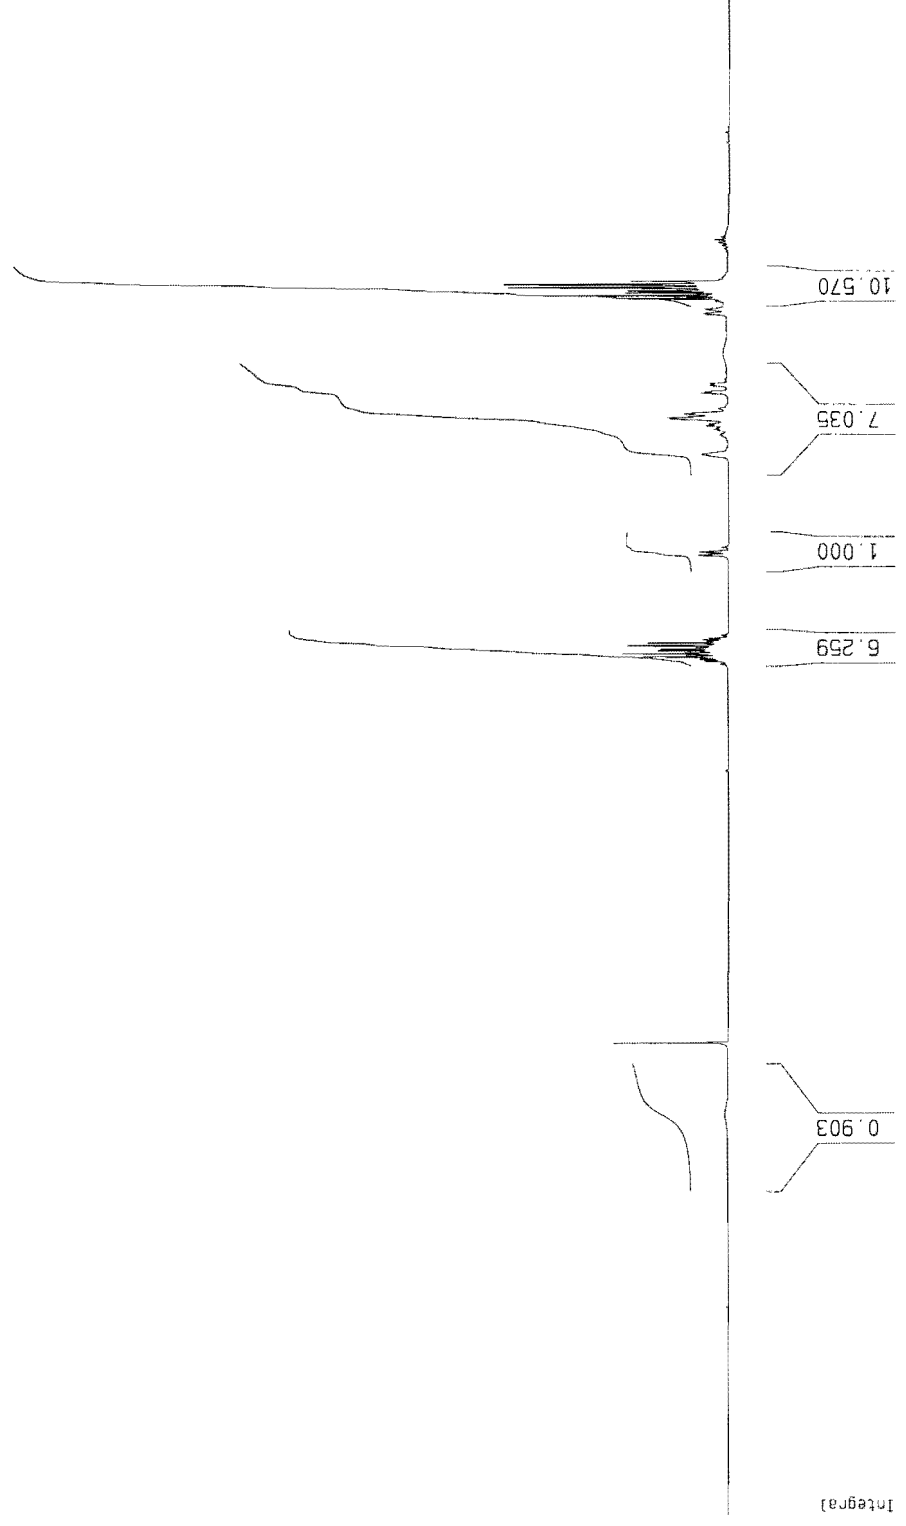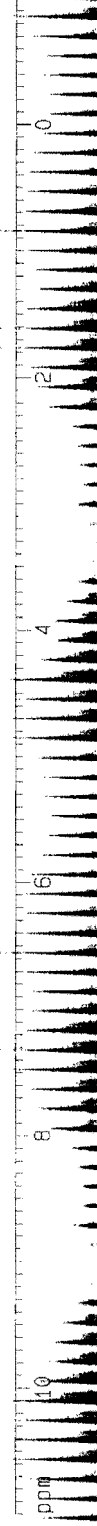

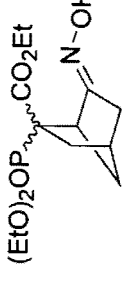

26

Current date: 2010-09-17  
 NAME: Sep17-2010-We3n  
 EXPNO: 32  
 PROCNO: 1

F2 - Acquisition Parameters  
 Date\_: 20100917  
 Time: 20.06  
 INSTRUM: spect  
 PROBHD: 5 mm QNP 1H/1  
 PULPROG: zgpg30  
 TD: 65536  
 SOLVENT: CDCl3  
 NS: 14782  
 DS: 4  
 SWH: 18796.992 Hz  
 FIDRES: 0.286819 Hz  
 AQ: 1.7433075 sec  
 RG: 1024  
 DM: 25.600 usec  
 DE: 5.00 usec  
 TE: 300.0 K  
 D1: 2.00000000 sec  
 D11: 0.03000000 sec  
 D12: 0.00002000 sec

===== CHANNEL f1 =====  
 NUC1: 13C  
 P1: 5.40 usec  
 PL1: -6.00 dB  
 SF01: 75.4106357 MHz

===== CHANNEL f2 =====  
 CPDPRG2: waltz16  
 NUC2: 1H  
 PCPD2: 115.00 usec  
 PL2: 0.00 dB  
 PL12: 20.00 dB  
 PL13: 20.00 dB  
 SF02: 299.8711995 MHz

F2 - Processing parameters  
 SI: 32768  
 SF: 75.4023747 MHz  
 WDW: EM  
 SSB: 0  
 LB: 1.00 Hz  
 GB: 0  
 PC: 1.40

1D NMR plot parameters  
 CX: 20.00 cm  
 F1P: 215.000 ppm  
 F1: 16211.51 Hz  
 F2P: -5.000 ppm  
 F2: -377.01 Hz  
 PPMX: 11.0000 ppm/Hz  
 YZCM: 829.48615 Hz/Hz

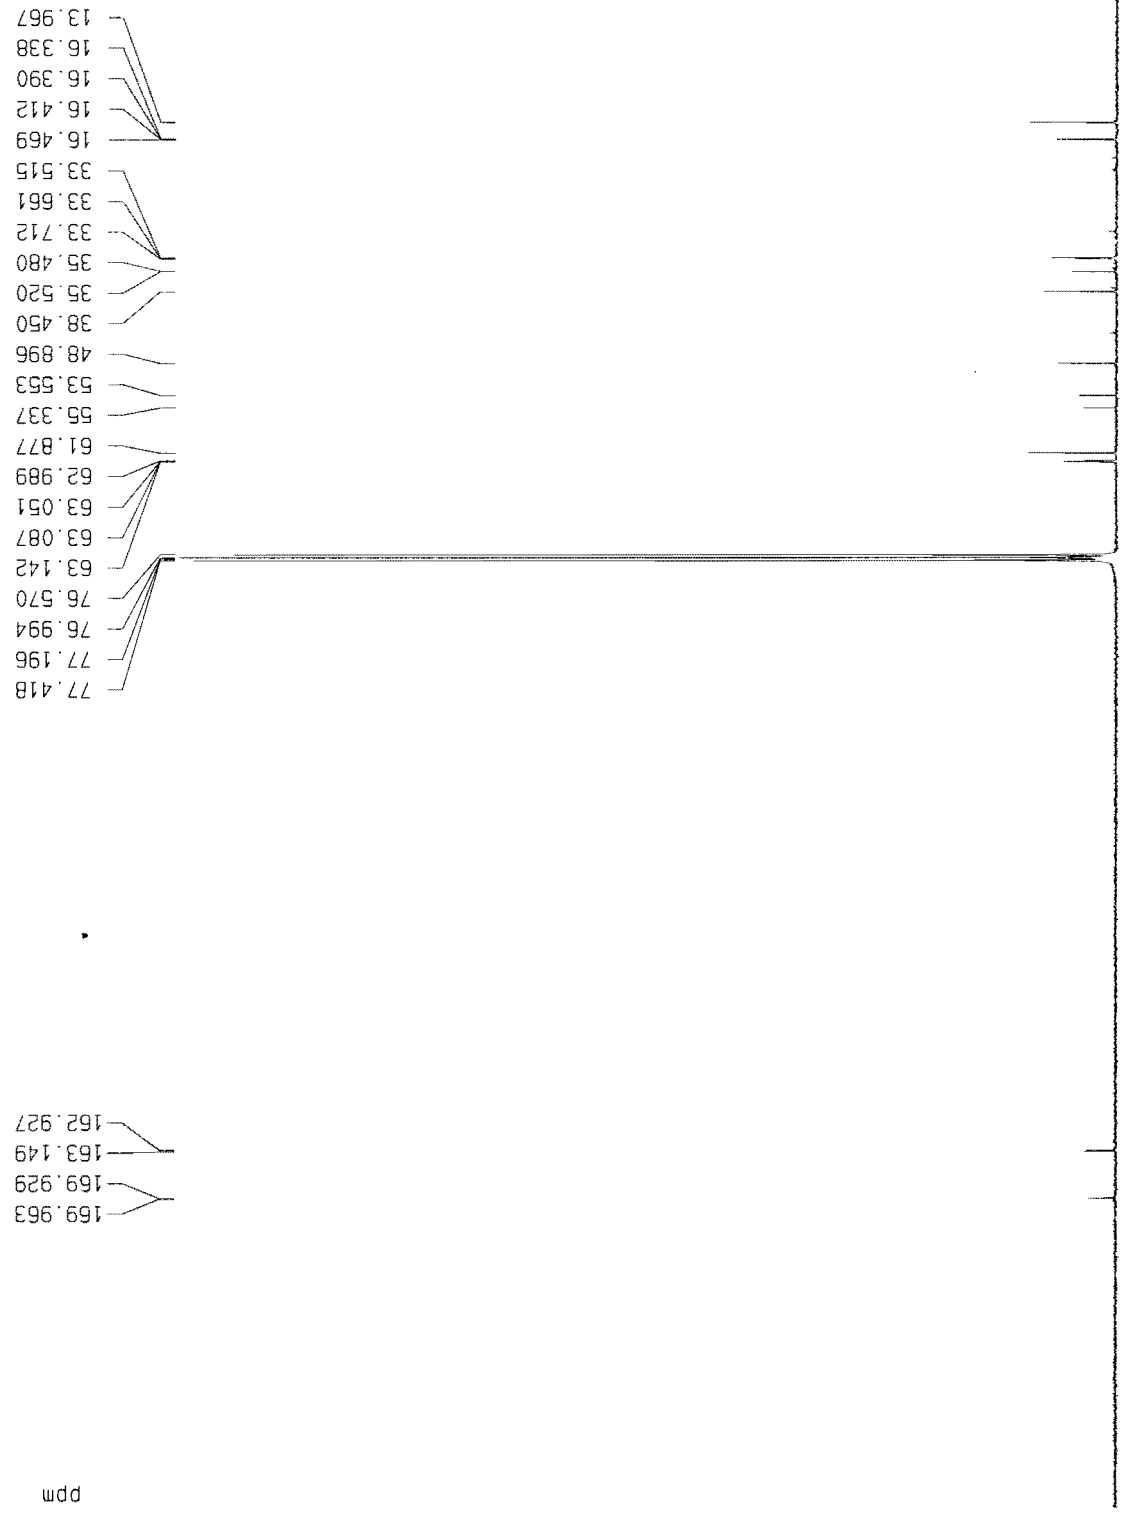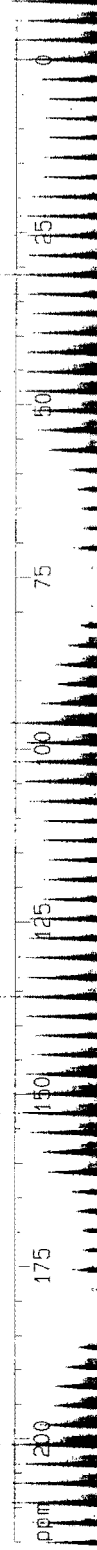

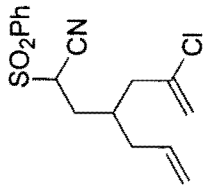

15g

Current Data Parameters  
 NAME Jun121-2010-Wein  
 EXPNO 10  
 PROCNO 1

F2 - Acquisition Parameters  
 Date\_ 20100721  
 Time 13.48  
 INSTRUM spect  
 PROBO 5 mm QNP 1H/1  
 PULPROG zg30  
 TO 65536  
 SOLVENT CDCl3  
 NS 16  
 DS 2  
 SWH 6172.839 Hz  
 FIDRES 0.094190 Hz  
 AQ 5.3084660 sec  
 RG 71.8  
 DM 81.000 usec  
 DE 6.00 usec  
 TE 300.0 K  
 D1 1.00000000 sec

==== CHANNEL f1 =====  
 NUC1 1H  
 P1 11.70 usec  
 PL1 0.00 dB  
 SF01 299.8718518 MHz

F2 - Processing parameters  
 SI 32768  
 SF 299.8700567 MHz  
 WDW EM  
 SSB 0  
 LB 0.30 Hz  
 GB 0  
 PC 1.00

1D NMR plot parameters  
 CX 20.00 cm  
 F1P 11.000 ppm  
 F1 3298.57 Hz  
 F2P -1.000 ppm  
 F2 -299.87 Hz  
 PPMCM 0.60000 ppm/cm  
 HZCM 179.92203 Hz/cm

7.84366  
7.81862  
7.81440  
7.63580  
7.61091  
7.58604  
7.50779  
7.48123  
7.45619  
5.55537  
5.52011  
5.08610  
5.08246  
5.07084  
5.06748  
5.04372  
5.00428  
4.96846  
4.94877  
4.93818  
4.91278  
3.97761  
3.96403  
3.93880  
3.92627  
2.18039  
2.17241  
2.15386  
2.10562  
2.05859  
2.03838  
1.97908  
1.96663  
1.95588  
1.93667  
1.92279  
1.91157  
1.89692  
1.82724  
1.51273

ppm

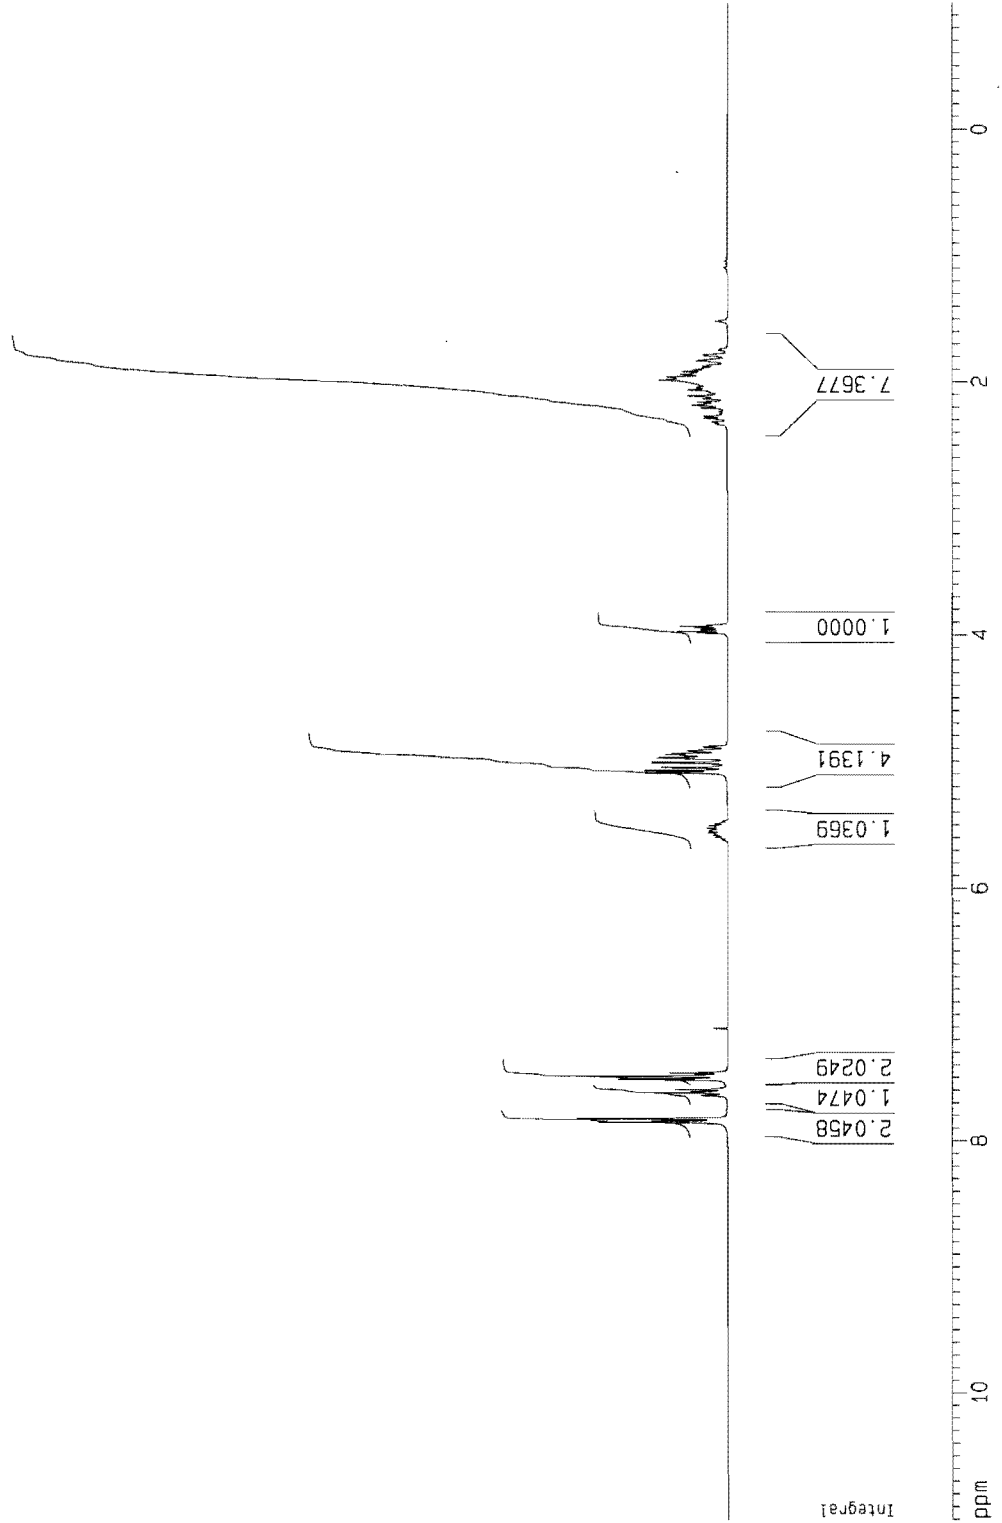

Integral

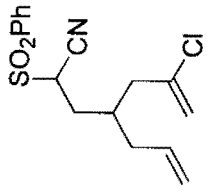

15g

Current Data Parameters  
 NAME Jul21-2010-Kein  
 EXPNO 11  
 PROCNO 1

F2 - Acquisition Parameters  
 Date\_ 20100721  
 Time 13.57  
 INSTRUM spect  
 PROBHD 5 mm QNP 1H/1  
 PULPROG zgpg30  
 TD 65536  
 SOLVENT CDCl3  
 NS 93  
 DS 4  
 SWH 18796.992 Hz  
 FIDRES 0.286919 Hz  
 AQ 1.7433076 sec  
 RG 4096  
 DM 25.600 usec  
 DE 6.00 usec  
 TE 300.0 K  
 D1 2.00000000 sec  
 D11 0.03000000 sec  
 D12 0.00002000 sec

\*\*\*\*\* CHANNEL f1 \*\*\*\*\*  
 NUC1 13C  
 P1 5.40 usec  
 PL1 -6.00 dB  
 SF01 75.4106357 MHz

\*\*\*\*\* CHANNEL f2 \*\*\*\*\*  
 CPDPRG2 waltz16  
 NUC2 1H  
 PCPD2 115.00 usec  
 PL2 0.00 dB  
 PL12 20.00 dB  
 PL13 20.00 dB  
 SF02 299.8711995 MHz

F2 - Processing parameters  
 SI 32768  
 SF 75.4023410 MHz  
 WDW EM  
 SSB 0  
 LB 1.00 Hz  
 GB 0  
 PC 1.40

1D NMR plot parameters  
 Cx 20.00 cm  
 F1P 215.000 ppm  
 F1 16211.50 Hz  
 F2P -5.000 ppm  
 F2 -377.01 Hz  
 PPMCM 11.00000 ppm/cm  
 HZCM 829.42578 Hz/cm

140.272  
140.151  
135.802  
134.769  
134.358  
130.092  
130.040  
130.026  
119.227  
118.965  
115.834  
115.516  
114.568  
114.249  
77.962  
77.538  
77.113  
56.147  
43.866  
43.392  
38.128  
36.640  
33.252  
33.003  
30.463  
30.059

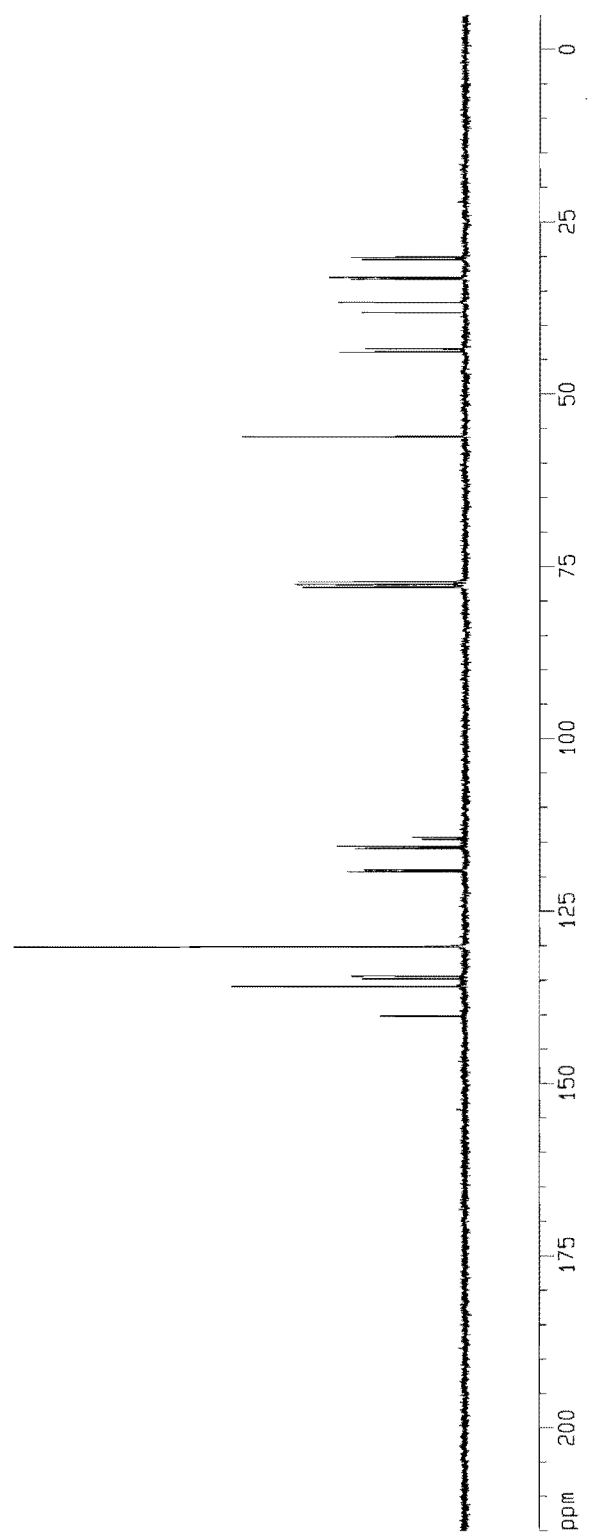

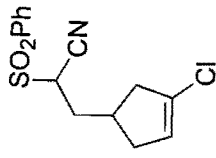

169

Current Data Parameters  
 NAME Jul125-2010-Wein  
 EXPNO 10  
 PROCNO 1

F2 - Acquisition Parameters  
 Date\_ 20100725  
 Time 12.14  
 INSTRUM spect  
 PROBHD 5 mm GNP 1H/1  
 PULPROG zg30  
 TO 65536  
 SOLVENT CDCl3  
 NS 16  
 DS 2  
 SWH 6172.839 Hz  
 FIDRES 0.094190 Hz  
 AQ 5.3084660 sec  
 RG 406.4  
 DW 81.000 usec  
 DE 6.00 usec  
 TE 300.0 K  
 D1 1.00000000 sec

===== CHANNEL f1 =====  
 NUC1 1H  
 P1 11.70 usec  
 PL1 0.00 dB  
 SFO1 299.8718516 MHz

F2 - Processing parameters  
 SI 32768  
 SF 299.8700301 MHz  
 WDW EM  
 SSB 0  
 LB 0.30 Hz  
 GB 0  
 PC 1.00

10 NMR plot parameters  
 CX 20.00 cm  
 F1P 11.000 ppm  
 F1 3298.57 Hz  
 F2P -1.000 ppm  
 F2 -299.87 Hz  
 PPMCM 0.60000 ppm/cm  
 HZCM 179.92201 Hz/cm

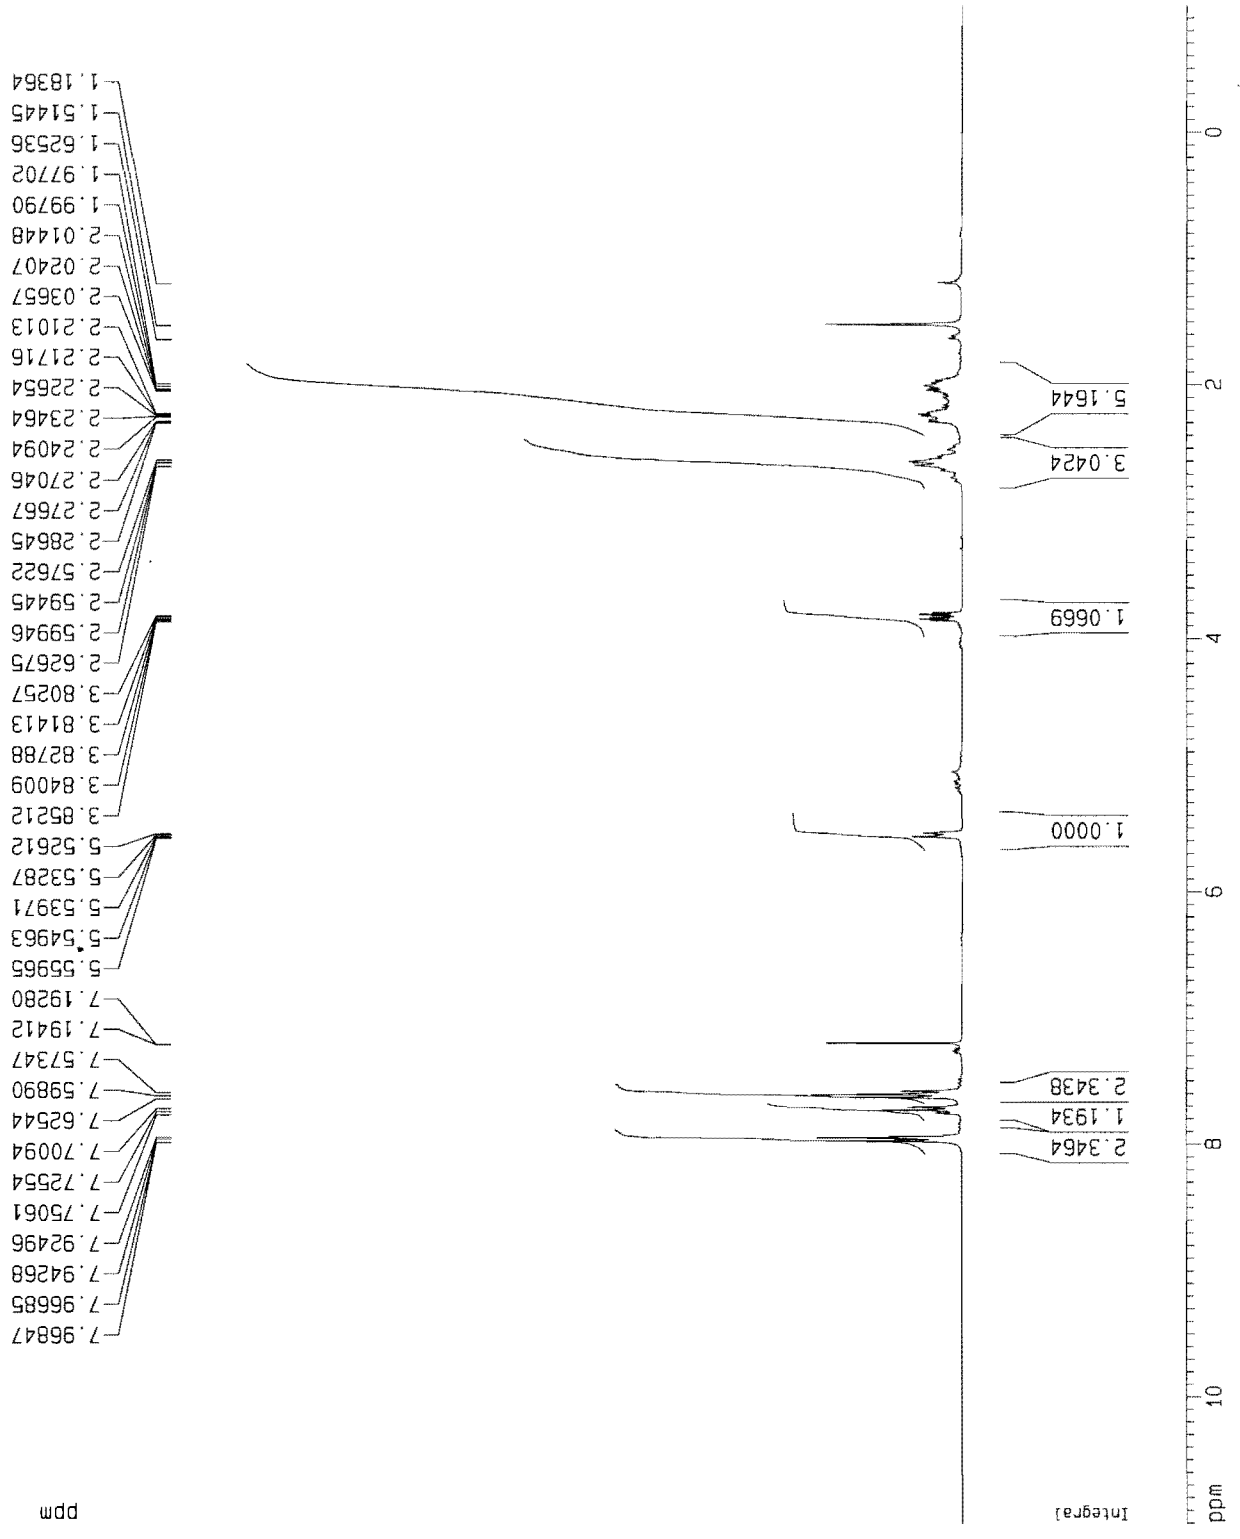

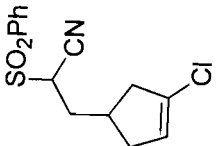

Current Data Parameters  
 NAME Jul25-2010-wein  
 EXPNO 31  
 PROCNO 1

F2 - Acquisition Parameters  
 Date\_ 20100725  
 Time 13.34  
 INSTRUM spect  
 PROBHD 5 mm QNP 1H/1  
 PULPROG zgpg30  
 TD 65536  
 SOLVENT CDCl3  
 NS 1253  
 OS 4  
 SWH 18796.992 HZ  
 FIDRES 0.286819 HZ  
 AQ 1.7433076 sec  
 RG 2048  
 DW 26.600 usec  
 DE 6.00 usec  
 TE 300.0 K  
 D1 2.00000000 sec  
 D11 0.03000000 sec  
 D12 0.00002000 sec

===== CHANNEL f1 =====  
 NUC1 13C  
 P1 5.40 usec  
 PL1 -6.00 dB  
 SF01 75.4106357 MHz

===== CHANNEL f2 =====  
 CPDPRG2 waltz16  
 NUC2 1H  
 PCPD2 115.00 usec  
 PL2 0.00 dB  
 PL12 20.00 dB  
 PL13 20.00 dB  
 SF02 299.8711995 MHz

F2 - Processing parameters  
 SI 32768  
 SF 75.4023410 MHz  
 WDW EM  
 SSB 0  
 LB 1.00 HZ  
 GB 0  
 PC 1.40

1D NMR plot parameters  
 CX 20.00 cm  
 F1P 215.000 ppm  
 F1 16211.50 HZ  
 F2P -5.000 ppm  
 F2 -377.01 HZ  
 PPMCM 11.00000 ppm/cm  
 HZCM 829.42578 Hz/cm

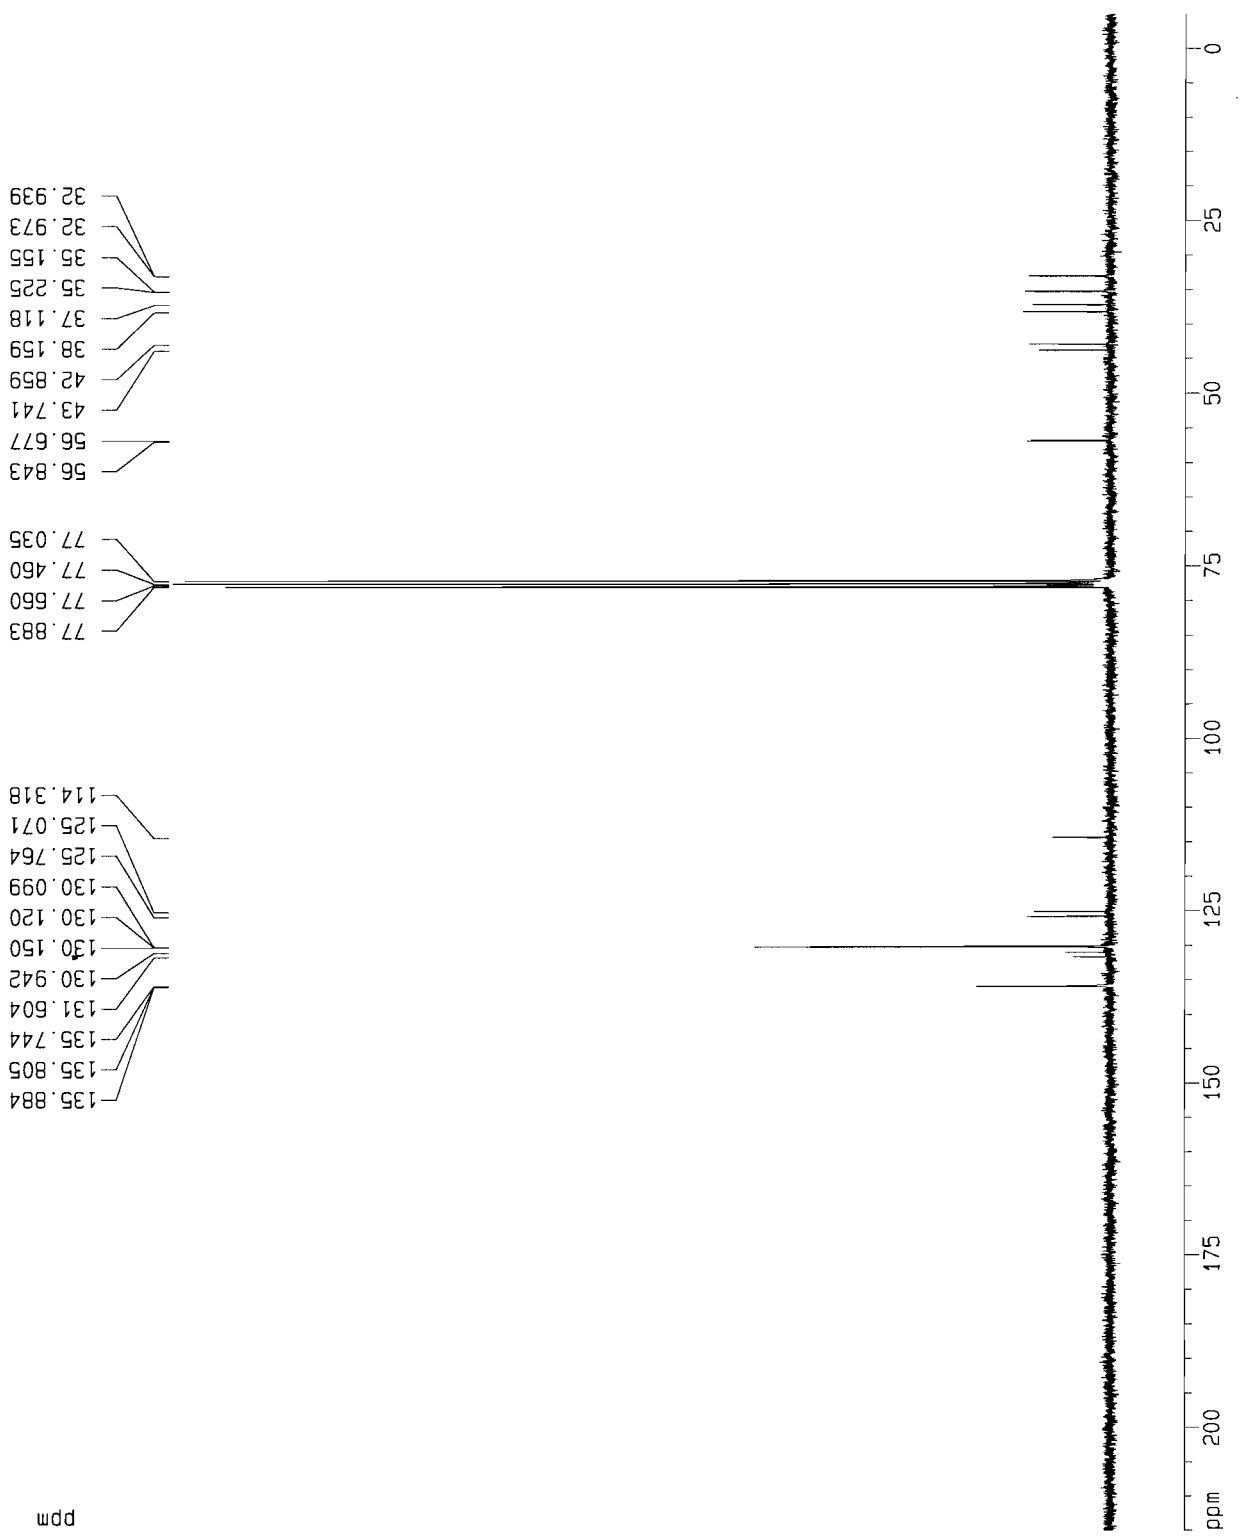

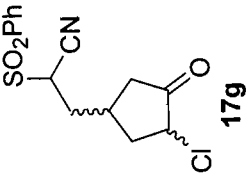

Current Data Parameters  
 NAME Jul28-2010-Wein  
 EXPNO 10  
 PROCNO 1

F2 - Acquisition Parameters  
 Date\_ 20100728  
 Time 18.13  
 INSTRUM spect  
 PROBHD 5 mm Multinu  
 PULPROG zg30  
 TD 65536  
 SOLVENT CDCl3  
 NS 16  
 DS 2  
 SWH 6172.839 Hz  
 FIDRES 0.094190 Hz  
 AQ 5.3084660 sec  
 RG 512  
 DW 81.000 usec  
 DE 6.00 usec  
 TE 300.0 K  
 D1 1.00000000 sec

==== CHANNEL f1 =====  
 NUC1 1H  
 P1 9.60 usec  
 PL1 -6.00 dB  
 SF01 300.1318534 MHz

F2 - Processing parameters  
 SI 32768  
 SF 300.1300263 MHz  
 WDW EM  
 SSB 0  
 LB 0.30 Hz  
 GB 0  
 PC 1.00

1D NMR plot parameters  
 CX 20.00 cm  
 F1P 11.000 ppm  
 F1 3301.43 Hz  
 F2P -1.000 ppm  
 F2 -300.13 Hz  
 PPMCM 0.60000 ppm/cm  
 HZCM 180.07802 Hz/cm

0.86392  
 1.18412  
 1.29544  
 1.52208  
 1.87210  
 1.90487  
 1.94098  
 1.97604  
 2.01038  
 2.11608  
 2.15325  
 2.23990  
 2.25434  
 2.29972  
 2.70779  
 2.73347  
 2.74072  
 2.77903  
 2.78549  
 3.81580  
 3.82995  
 3.85285  
 3.86751  
 3.88209  
 3.90478  
 3.91899  
 4.09425  
 4.11218  
 7.19339  
 7.57384  
 7.59117  
 7.59633  
 7.61568  
 7.64244  
 7.72099  
 7.72474  
 7.73952  
 7.74625  
 7.75247  
 7.77071  
 7.94704  
 7.95133  
 7.97544

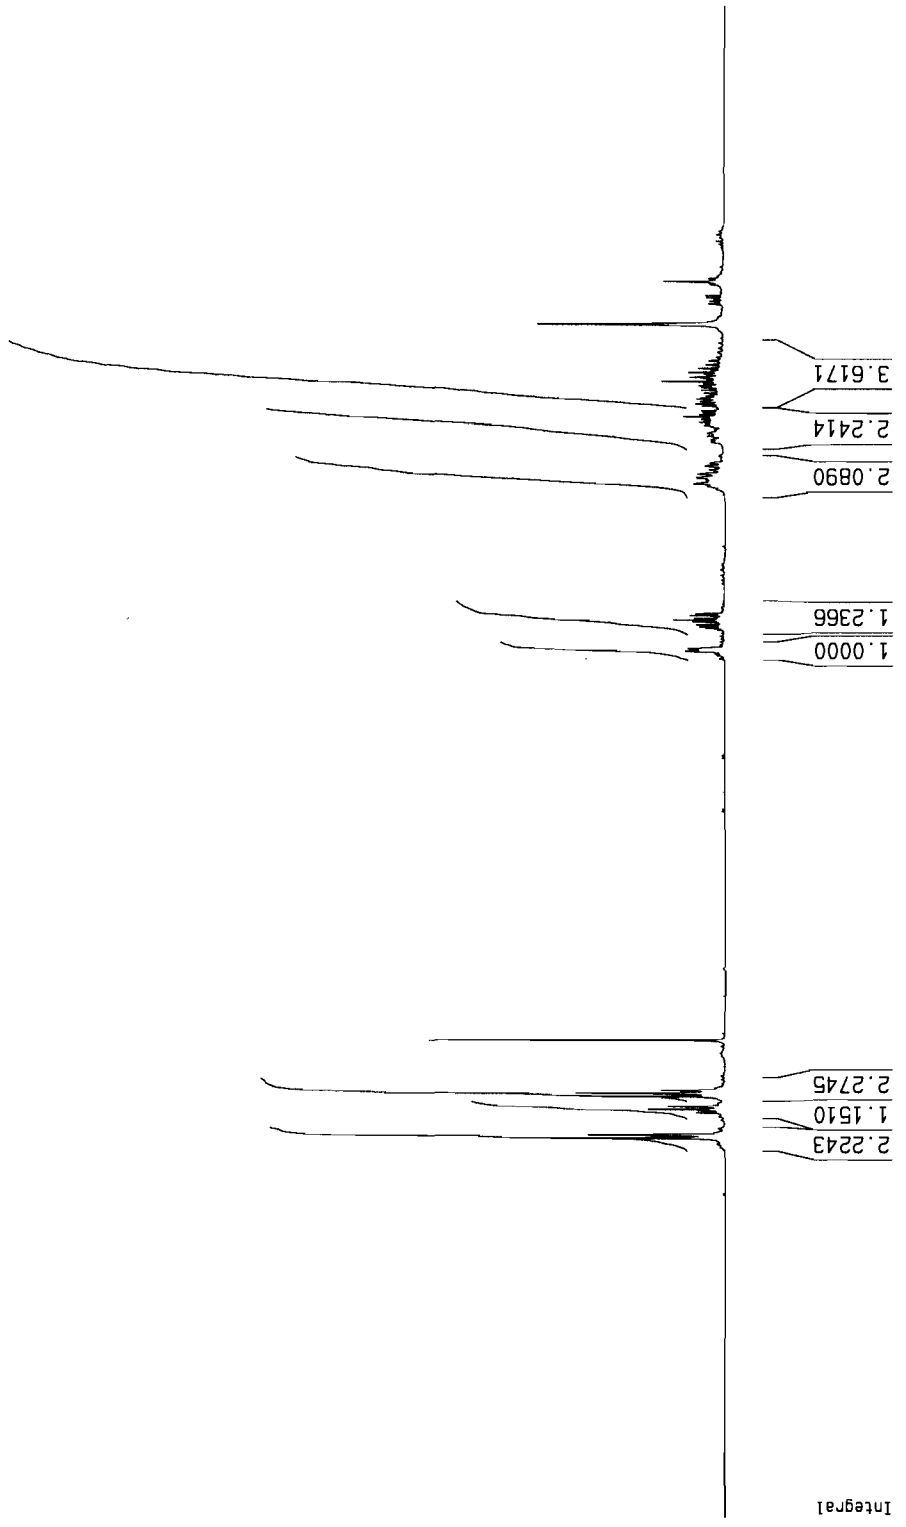



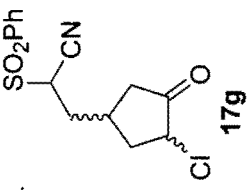

Current Data Parameters  
 NAME Jul128-2010-wejn  
 EXPNO 11  
 PROCNO 1

F2 - Acquisition Parameters  
 Date\_ 20100728  
 Time\_ 22.27  
 INSTRUM spect  
 PROBHD 5 mm GNP 4H/1  
 PULPROG zgpg30  
 TO 65536  
 SOLVENT CDCl3  
 NS 11579  
 OS 4  
 SWH 18796.992 Hz  
 FIDRES 0.286819 Hz  
 AQ 1.7433076 sec  
 RG 2048  
 OW 26.600 usec  
 DE 6.00 usec  
 TE 300.0 K  
 O1 2.00000000 sec  
 D11 0.03000000 sec  
 D12 0.00002000 sec

\*\*\*\*\* CHANNEL f1 \*\*\*\*\*  
 NUC1 13C  
 P1 5.40 usec  
 PL1 -6.00 dB  
 SF01 75.4106357 MHz

\*\*\*\*\* CHANNEL f2 \*\*\*\*\*  
 CPDPRG2 waltz16  
 NUC2 1H  
 PCPD2 115.00 usec  
 PL2 0.00 dB  
 PL12 20.00 dB  
 PL13 20.00 dB  
 SF02 299.8711995 MHz

F2 - Processing parameters  
 SI 32768  
 SF 75.4023410 MHz  
 WDW EM  
 SSB 0  
 LB 1.00 Hz  
 GB 0  
 PC 1.40

1D NMR plot parameters  
 CX 20.00 cm  
 F1P 215.000 ppm  
 F1 16211.50 Hz  
 F2P -5.000 ppm  
 F2 -377.01 Hz  
 PPMCM 11.00000 ppm/cm  
 HZCM 829.42578 Hz/cm

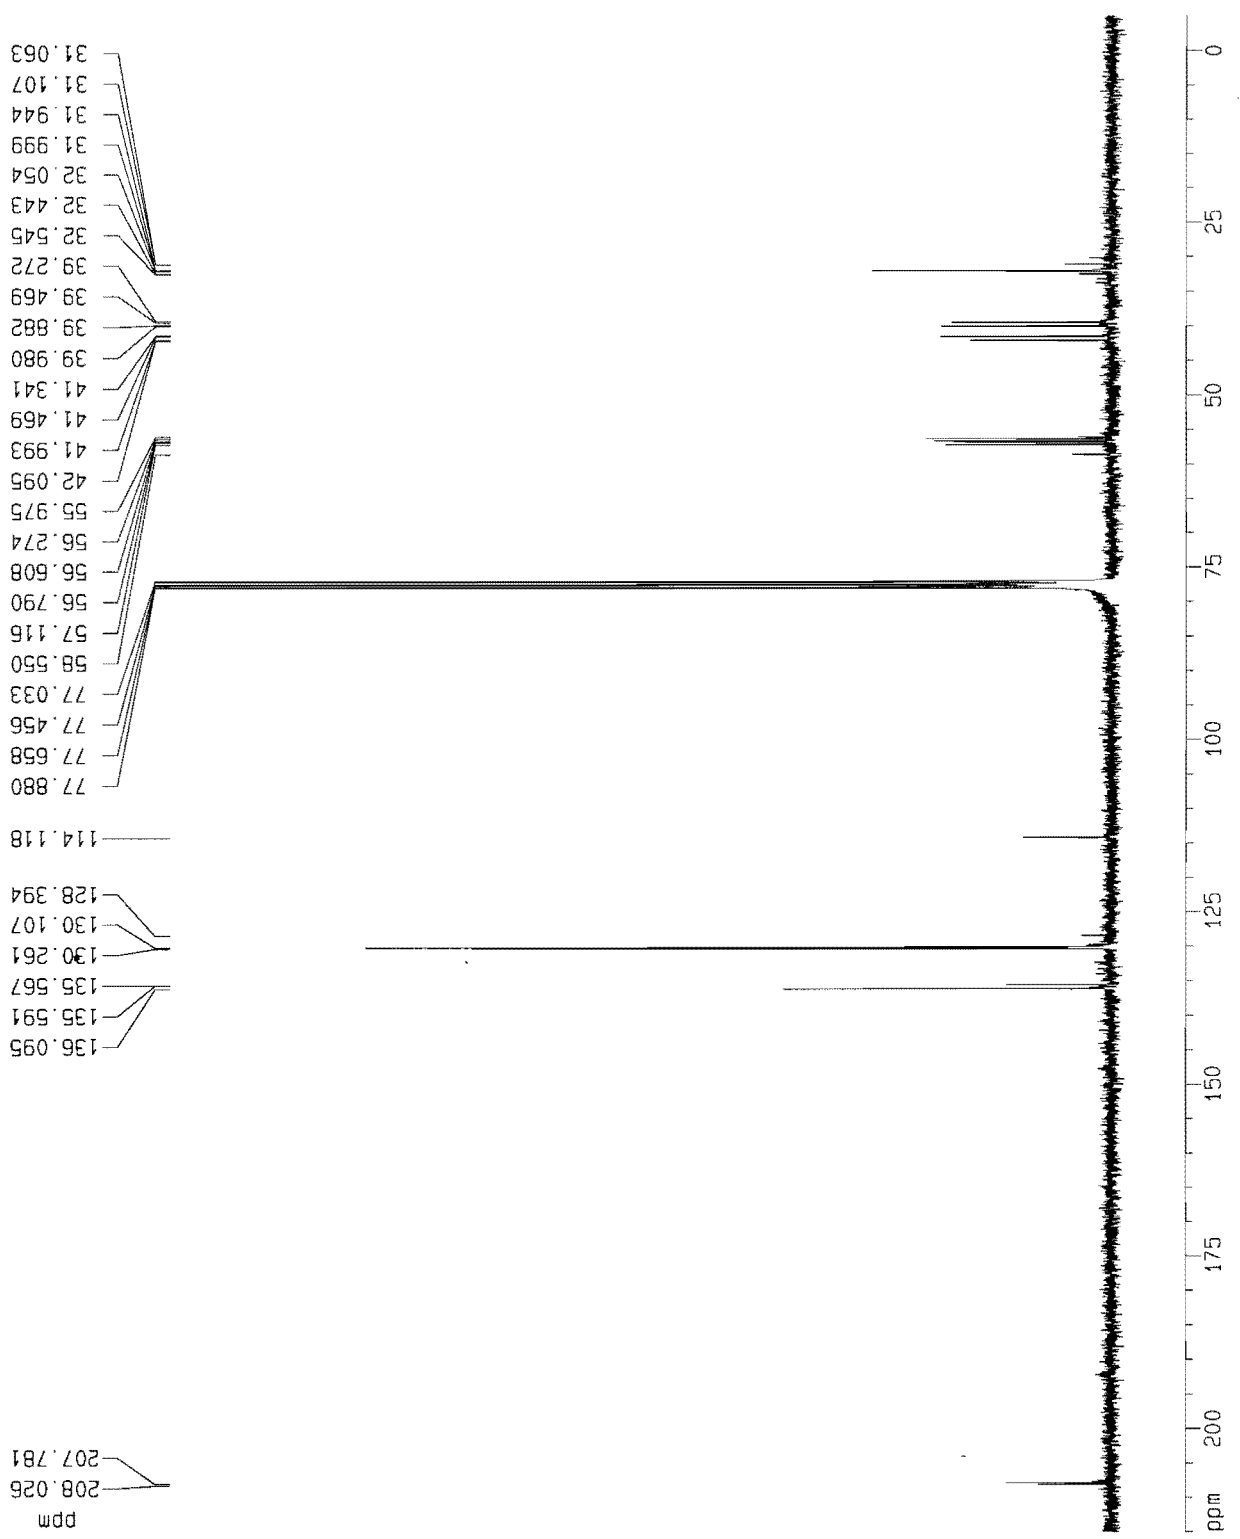

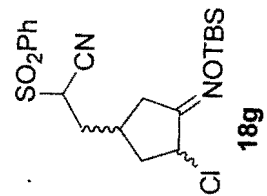

Current Data Parameters  
 NAME Jul30-2010-Wein  
 EXPNO 20  
 PROCNO 1

F2 - Acquisition Parameters  
 Date\_ 20100730  
 Time 16.08  
 INSTRUM spect  
 PROCNO 5 mm QNP 1H/1  
 PULPROG zg30  
 TO 65536  
 SOLVENT CDC13  
 NS 16  
 DS 2  
 SWH 6172.839 Hz  
 FIDRES 0.094190 Hz  
 AQ 5.3064560 sec  
 RG 287.4  
 DM 81.000 usec  
 DE 5.00 usec  
 TE 300.0 K  
 D1 1.00000000 sec

===== CHANNEL f1 =====  
 NUC1 1H  
 P1 11.70 usec  
 PL1 0.00 dB  
 SF01 299.8718518 MHz

F2 - Processing parameters  
 SI 32768  
 SF 299.8700579 MHz  
 WDW EM  
 SSB 0  
 LB 0.30 Hz  
 GB 0  
 PC 1.00

1D NMR plot parameters  
 CX 20.00 cm  
 F1P 11.000 ppm  
 F1 3298.57 Hz  
 F2P -1.000 ppm  
 F2 -299.87 Hz  
 PPMCM 0.60000 ppm/cm  
 HZCM 179.92203 Hz/cm

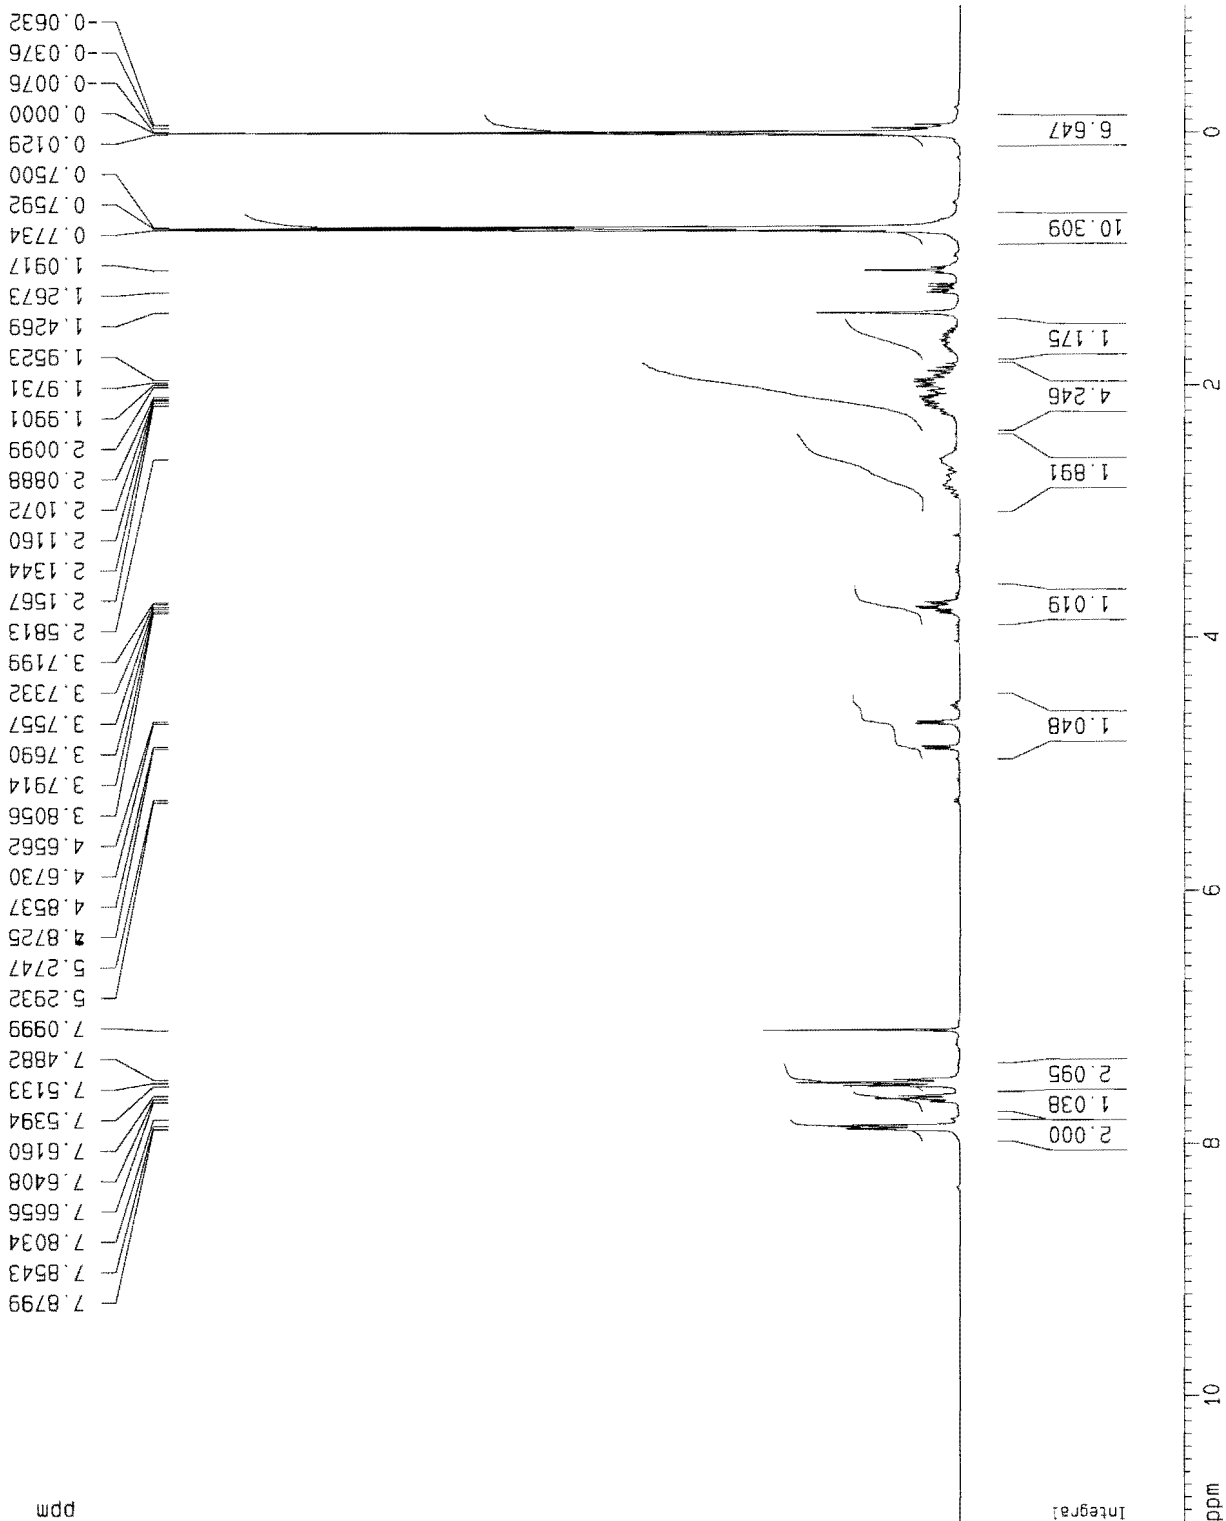

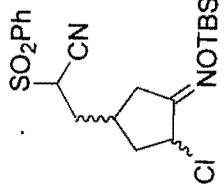

18g

Current Data Parameters  
 NAME Jul30-2010-wejn  
 EXPNO 21  
 PROCNO 1

F2 - Acquisition Parameters  
 Date\_ 20100730  
 Time\_ 16.20  
 INSTRUM spect  
 PROBHD 5 mm GNP 1H/1  
 PULPROG zgpg30  
 TO 65536  
 SOLVENT CDCl3  
 NS 3455  
 QS 4  
 SWH 18796.992 Hz  
 FIDRES 0.286619 Hz  
 AQ 1.7433075 sec  
 RG 4096  
 DM 26.600 usec  
 DE 6.00 usec  
 TE 300.0 K  
 D1 2.00000000 sec  
 D11 0.03000000 sec  
 D12 0.00002000 sec

===== CHANNEL f1 =====  
 NUC1 13C  
 P1 5.40 usec  
 PL1 -6.00 dB  
 SF01 75.4106357 MHz

===== CHANNEL f2 =====  
 CPDPRG2 waltz16  
 NUC2 1H  
 PCPD2 115.00 usec  
 PL2 0.00 dB  
 PL12 20.00 dB  
 PL13 20.00 dB  
 SF02 299.8711995 MHz

F2 - Processing parameters  
 SI 32768  
 SF 75.4023410 MHz  
 WDW EM  
 SSB 0  
 LB 1.00 Hz  
 GB 0  
 PC 1.40

1D NMR plot parameters  
 CX 20.00 cm  
 F1P 215.000 ppm  
 F1 16211.50 Hz  
 F2P -5.000 ppm  
 F2 -377.01 Hz  
 PPMCM 11.00000 ppm/cm  
 HZCM 829.42578 Hz/cm

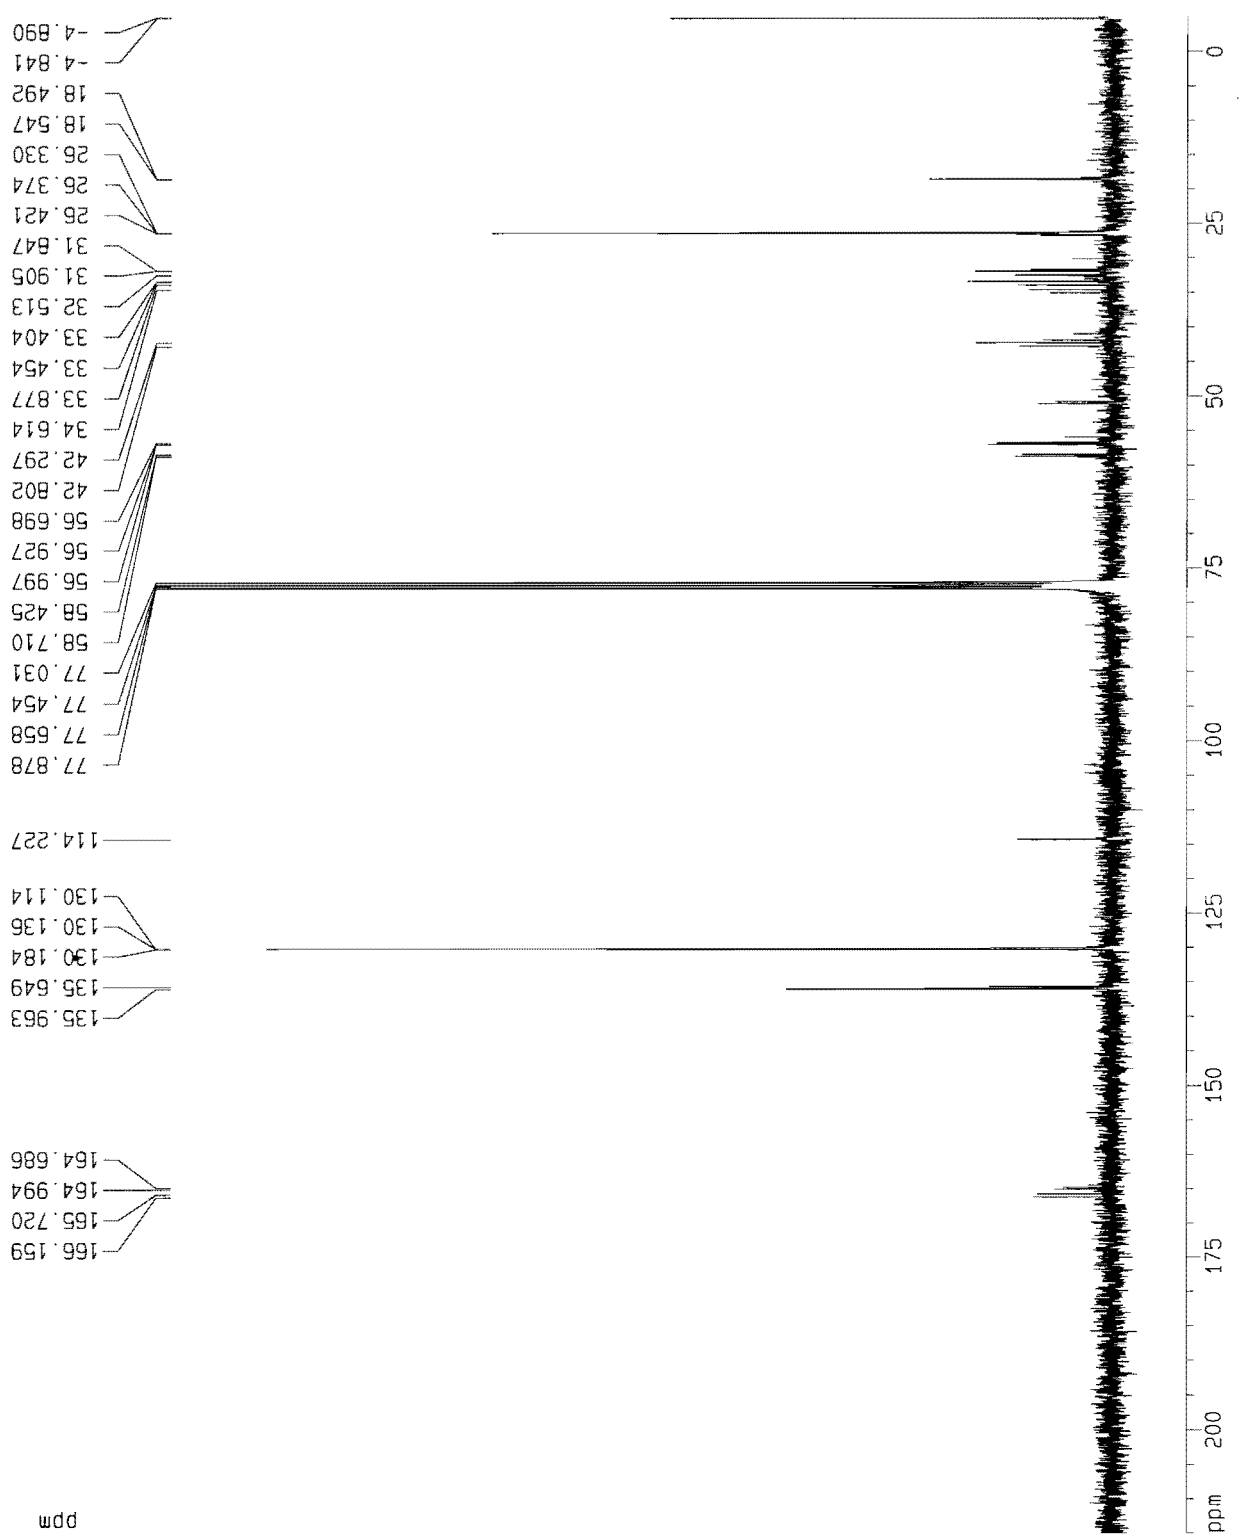

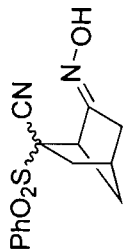

27

Current Data Parameters  
 NAME Aug01-2010-Me.in  
 EXPNO 10  
 PROCNO 1

F2 - Acquisition Parameters  
 Date\_ 20100801  
 Time 11.20  
 INSTRUM spect  
 PROBHD 5 mm GNP 1H/1  
 PULPROG zg30  
 TD 65536  
 SOLVENT CDC13  
 NS 41  
 DS 0  
 SWH 6172.839 Hz  
 FIDRES 0.094190 Hz  
 AQ 5.3084660 sec  
 RG 574.7  
 DM 81.000 usec  
 DE 6.00 usec  
 TE 300.0 K  
 D1 2.00000000 sec

===== CHANNEL f1 =====

NUC1 1H  
 P1 11.70 usec  
 PL1 0.00 dB  
 SFD1 299.8718518 MHz

F2 - Processing parameters  
 SI 32768  
 SF 299.8700545 MHz  
 WDW EM  
 SSB 0  
 LB 0.30 Hz  
 GB 0  
 PC 1.00

1D NMR plot parameters  
 CX 20.00 cm  
 F1P 11.000 ppm  
 F1 3298.57 Hz  
 F2P -1.000 ppm  
 F2 -299.87 Hz  
 PPMCM 0.60000 ppm/cm  
 HZCM 179.92203 Hz/cm

1.10061  
 1.20953  
 1.22780  
 1.25516  
 1.27364  
 1.49369  
 1.52857  
 1.87572  
 1.88422  
 1.89640  
 1.91924  
 1.92845  
 2.09389  
 2.10554  
 2.32989  
 2.34160  
 2.37691  
 2.39118  
 2.40242  
 2.66513  
 2.67570  
 3.21689

7.90729  
 7.88237  
 7.65215  
 7.62769  
 7.60362  
 7.52588  
 7.49921  
 7.47402  
 7.22198  
 7.11141

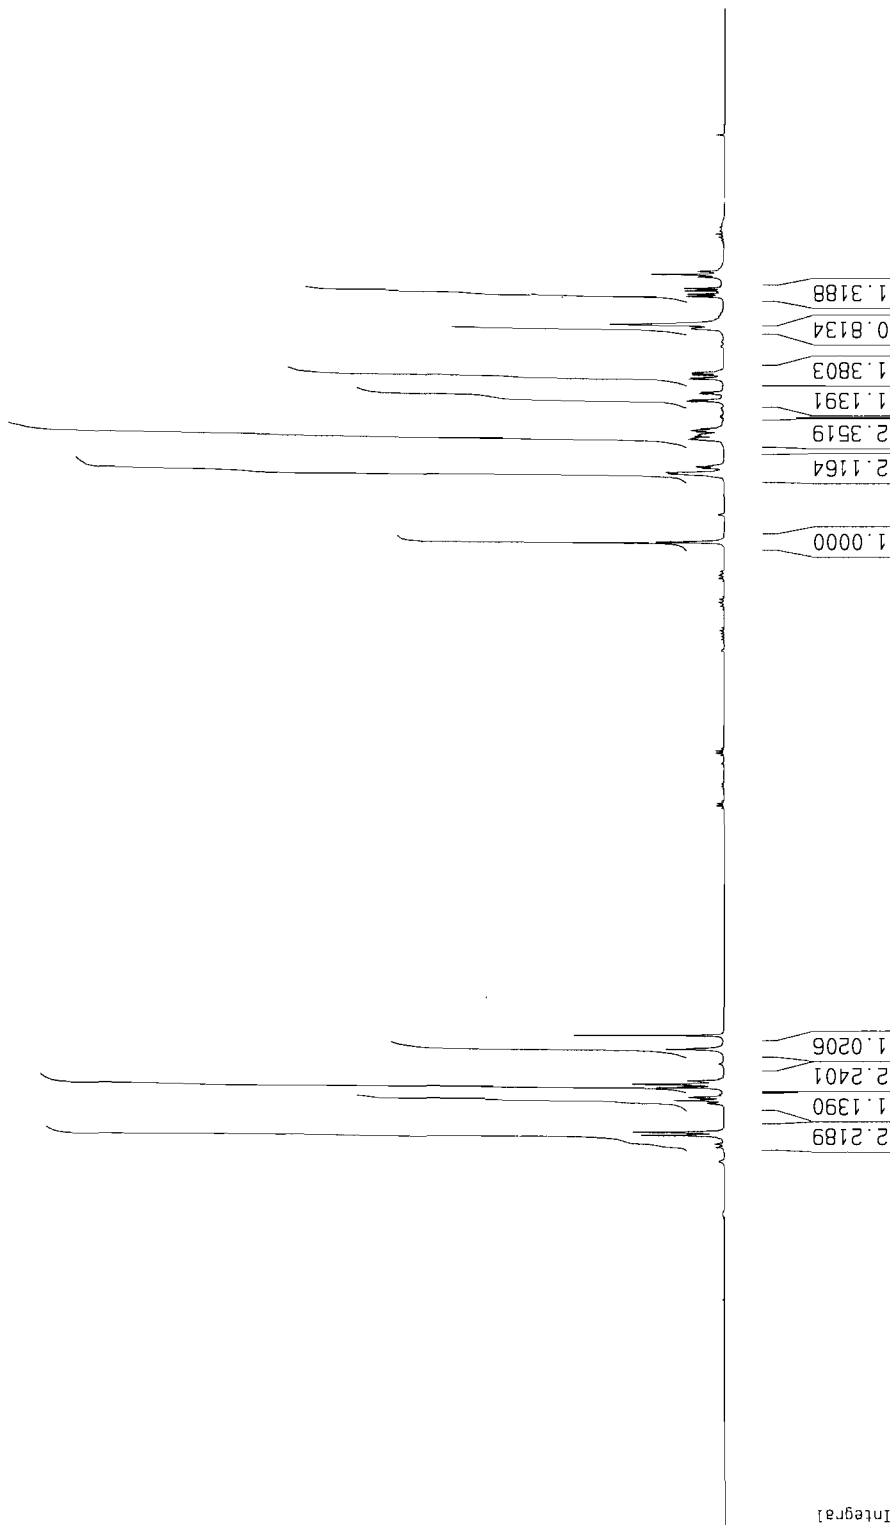

PhO<sub>2</sub>S

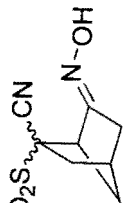

27

Current Data Parameters  
NAME Aug01-2010-MeIn  
EXPNO 12  
PROCNO 1

F2 - Acquisition Parameters  
Date\_ 20100801  
Time 13.01  
INSTRUM spect  
PROBHD 5 mm GNP 1H/1  
PULPROG zgpg30  
TD 65536  
SOLVENT CDC13  
NS 20174  
DS 4  
SMH 10796.992 Hz  
FIDRES 0.286819 Hz  
AQ 1.7433076 sec  
RG 3649.1  
DM 26.600 usec  
DE 6.00 usec  
TE 300.0 K  
D1 2.00000000 sec  
D11 0.03000000 sec  
D12 0.00002000 sec

===== CHANNEL f1 =====  
NUC1 13C  
P1 5.40 usec  
PL1 -6.00 dB  
SF01 75.4106357 MHz

===== CHANNEL f2 =====  
CPOPRG2 waltz16  
NUC2 1H  
PCPD2 115.00 usec  
PL2 0.00 dB  
PL12 20.00 dB  
PL13 20.00 dB  
SF02 299.8711995 MHz

F2 - Processing parameters  
SI 32768  
SF 75.4023410 MHz  
WDW EM  
SSB 0  
LB 1.00 Hz  
GB 0  
PC 1.40

1D NMR plot parameters  
CX 20.00 cm  
F1P 245.000 ppm  
F1 16211.50 Hz  
F2P -5.000 ppm  
F2 -377.01 Hz  
PPMCM 11.00000 ppm/cm  
HZCM 829.42578 Hz/cm

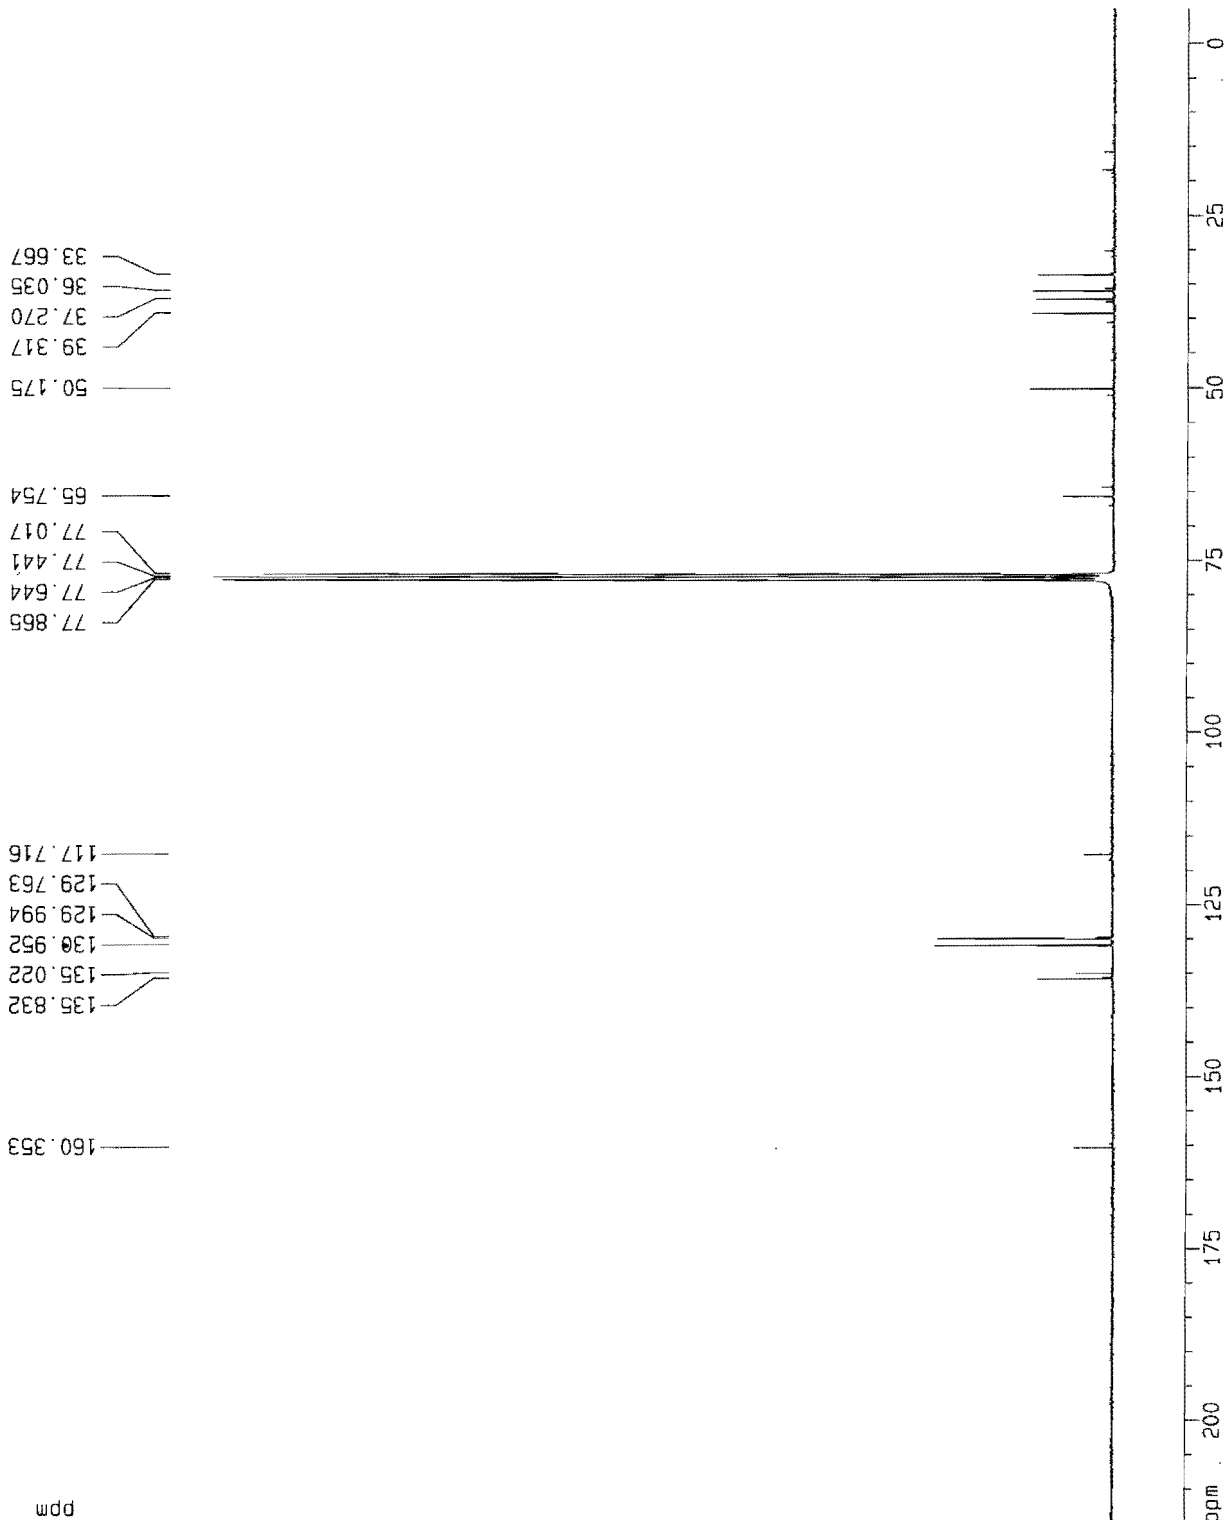

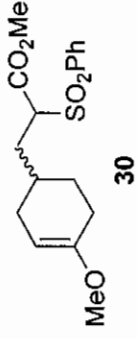

PL - II - p211 - P

Current Data Parameters  
 NAME Dec11-2010-Wain  
 EXPNO 10  
 PROCNO 1

F2 - Acquisition Parameters  
 Date\_ 20101211  
 Time 17.42  
 INSTRUM spect  
 PROBHD 5 mm Multinu  
 PULPROG zg30  
 TD 65536  
 SOLVENT CDCl3  
 NS 16  
 DS 2  
 SWH 6172.639 Hz  
 FIDRES 0.094190 Hz  
 AQ 5.3084660 sec  
 RG 181  
 OW 81.000 usec  
 DE 6.00 usec  
 TE 300.0 K  
 D1 1.00000000 sec

===== CHANNEL f1 =====  
 NUC1 1H  
 P1 9.60 usec  
 PL1 -6.00 dB  
 SF01 300.1318534 MHz

F2 - Processing parameters  
 SI 32768  
 SF 300.1300148 MHz  
 WDW EM  
 SSB 0  
 LB 0.30 Hz  
 GB 0  
 PC 1.00

1D NMR plot parameters  
 CX 20.00 cm  
 F1P 11.000 ppm  
 F1 3301.43 Hz  
 F2P -1.000 ppm  
 F2 -300.13 Hz  
 PPMCM 0.60000 ppm/cm  
 HZCM 180.07800 Hz/cm

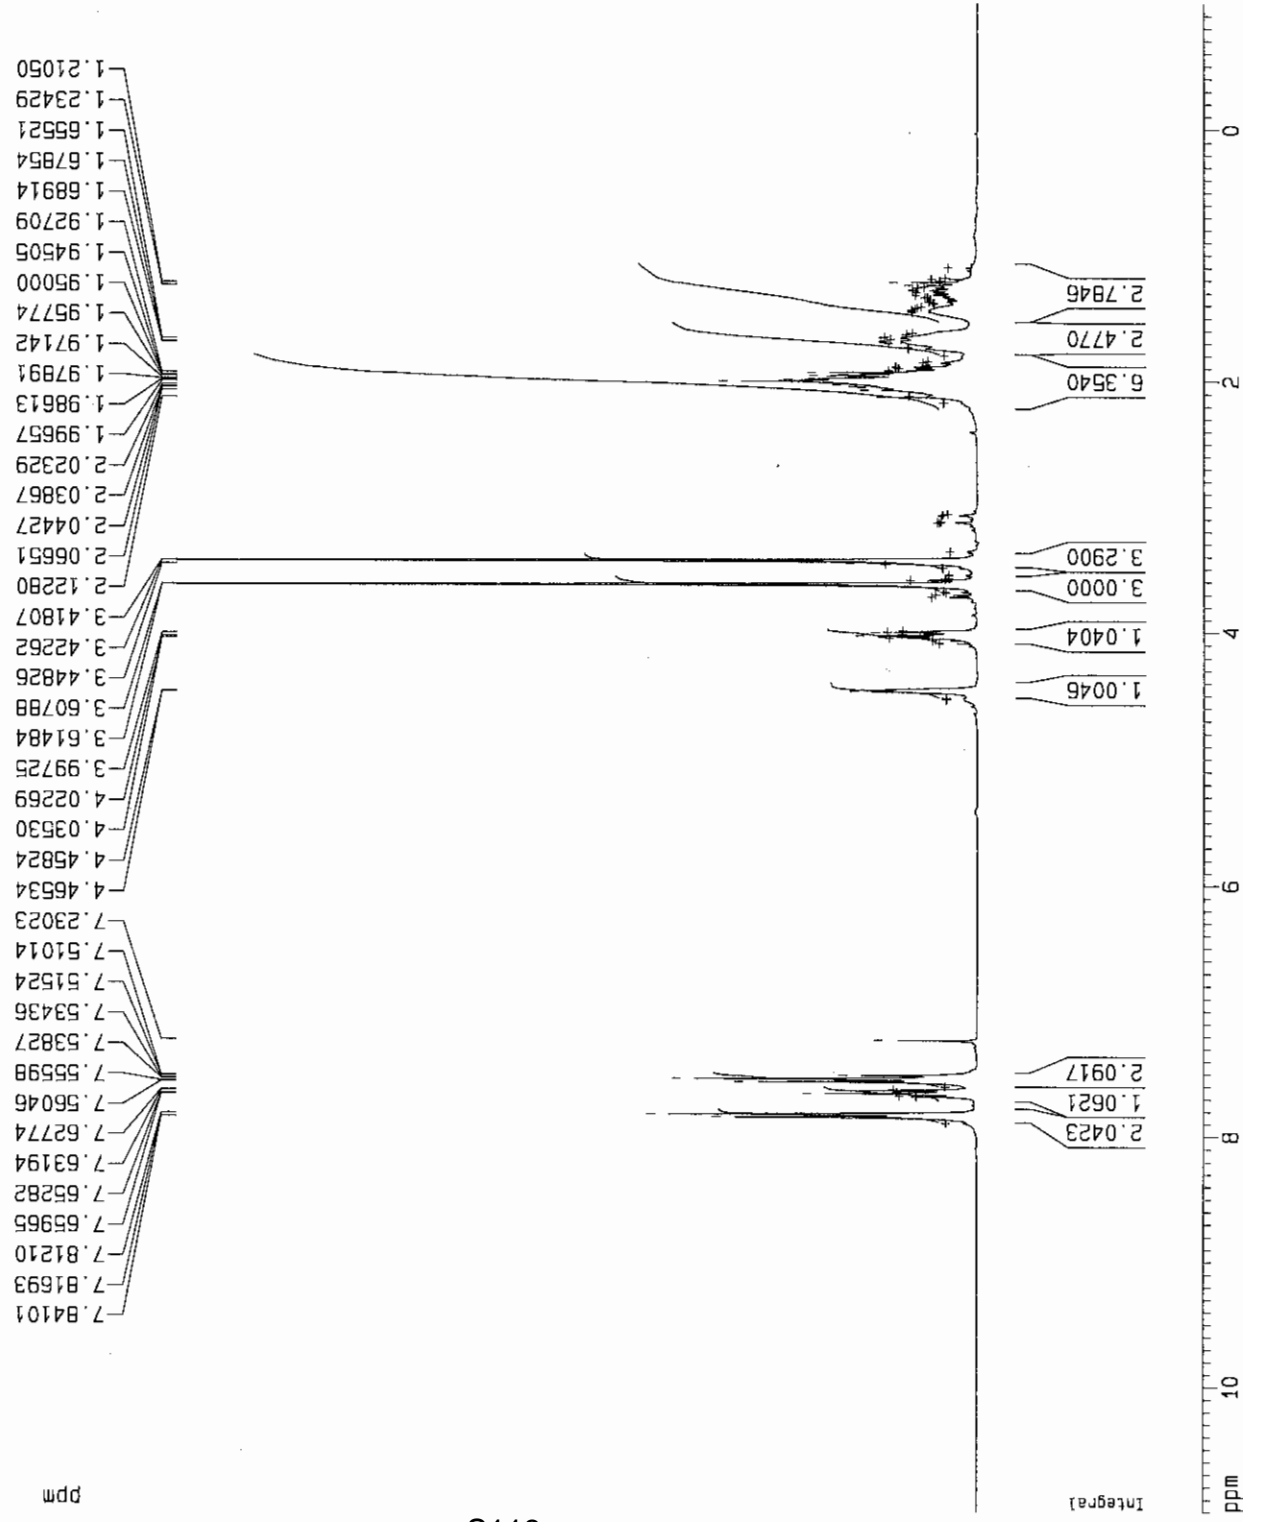

PL - II - p205 - P

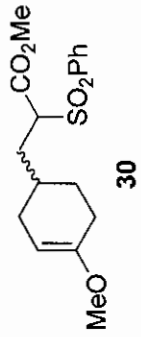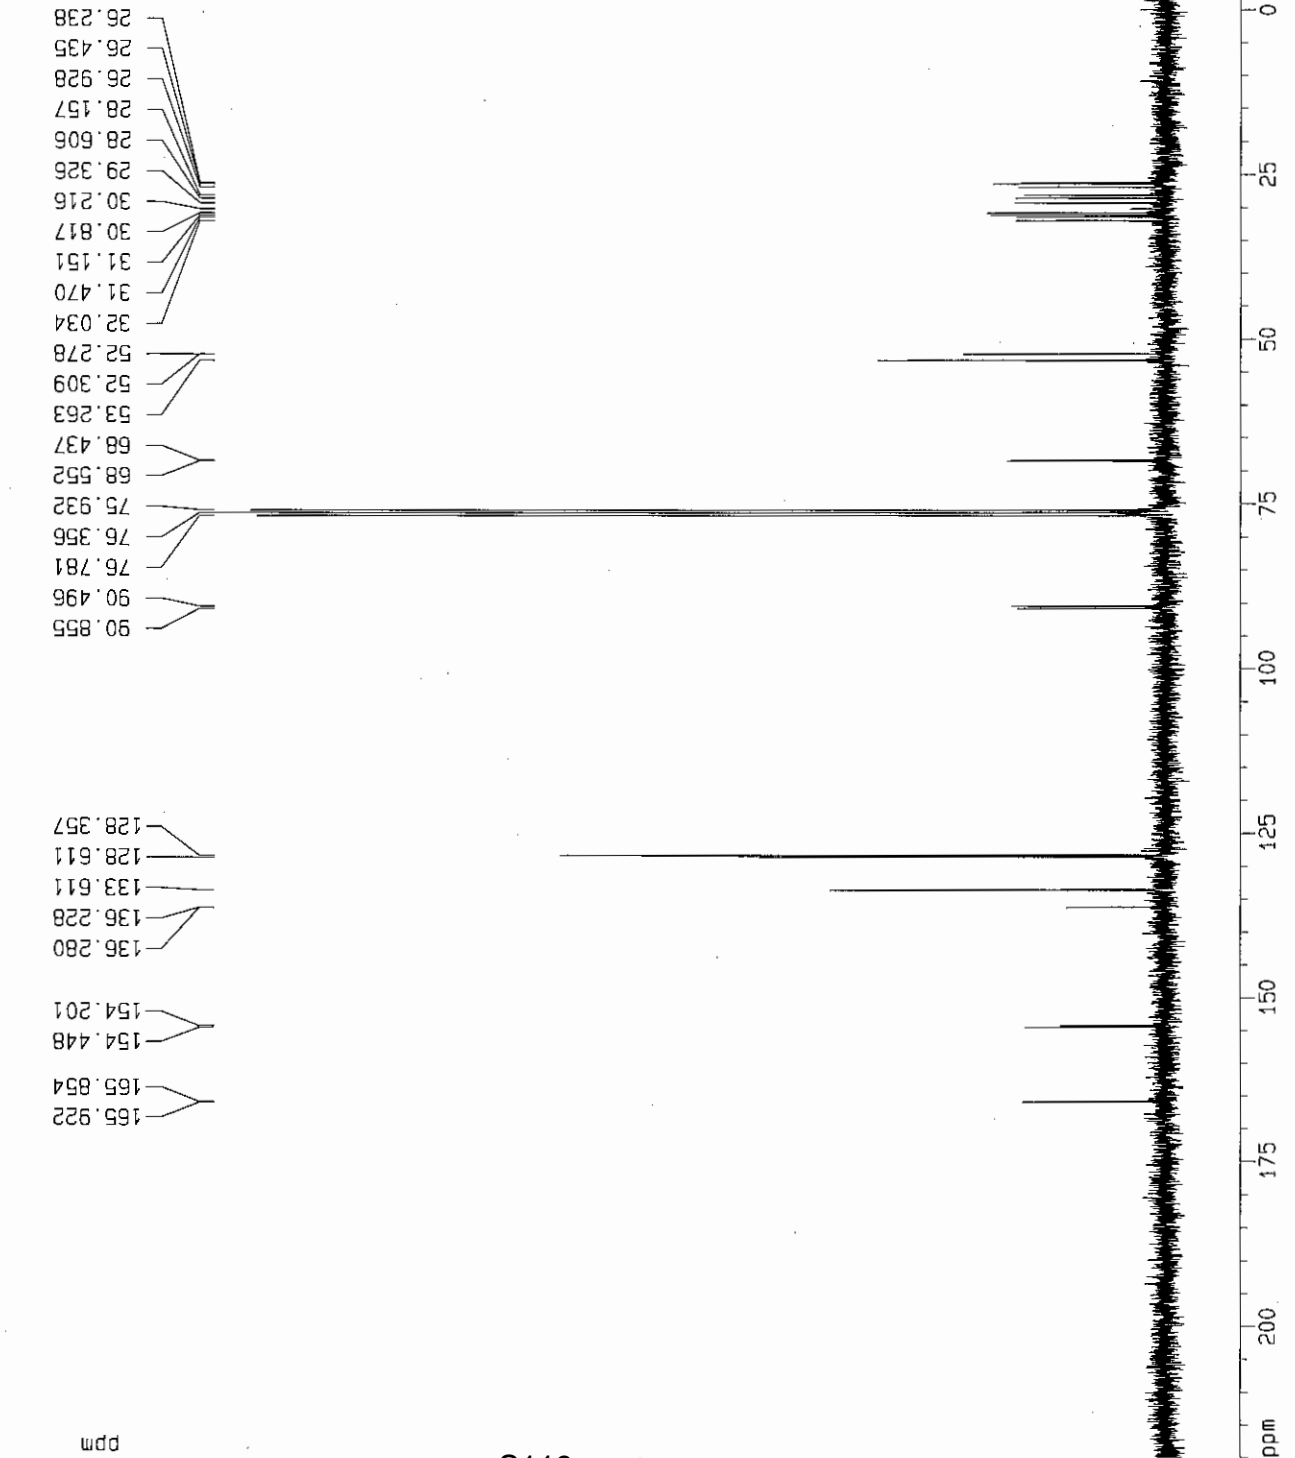

Current Data Parameters  
 NAME Dec04-2010-Wein  
 EXPNO 11  
 PROCNO 1

F2 - Acquisition Parameters  
 Date\_ 20101204  
 Time 16.06  
 INSTRUM spect  
 PROBRD 5 mm QNP 1H/1  
 PULPROG zgpg30  
 TO 65536  
 SOLVENT CDCl3  
 NS 450  
 DS 4  
 SWH 18796.992 Hz  
 FIDRES 0.286819 Hz  
 AQ 1.7433075 sec  
 RG 8192  
 DM 26.600 usec  
 DE 6.00 usec  
 TE 300.0 K  
 D1 2.00000000 sec  
 D11 0.03000000 sec  
 D12 0.00002000 sec

==== CHANNEL f1 =====  
 NUC1 13C  
 P1 5.40 usec  
 PL1 -6.00 dB  
 SF01 75.4106357 MHz

==== CHANNEL f2 =====  
 CPOPRG2 waltz16  
 NUC2 1H  
 P2 115.00 usec  
 PL2 0.00 dB  
 PL12 20.00 dB  
 PL13 20.00 dB  
 SF02 299.8711995 MHz

F2 - Processing parameters  
 SI 32768  
 SF 75.4024255 MHz  
 WDW EM  
 SSB 0  
 LB 1.00 Hz  
 GB 0  
 PC 1.40

ID NMR plot parameters  
 CX 20.00 cm  
 F1P 220.000 ppm  
 F1 16588.53 Hz  
 F2P -10.000 ppm  
 F2 -754.03 Hz  
 PPMCM 11.50000 ppm/cm  
 HZCM 867.12793 Hz/cm

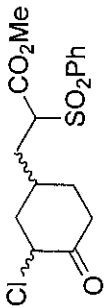

31

PL - II - p212 - P

Current Data Parameters  
 NAME Dec14-2010-Me1n  
 EXPNO 10  
 PROCNO 1

F2 - Acquisition Parameters  
 Date\_ 20101214  
 Time 12.54  
 INSTRUM spect  
 PROBHD 5 mm QNP 1H/1  
 PULPROG zg30  
 TD 65536  
 SOLVENT CDC13  
 NS 16  
 DS 2  
 SWH 6172.839 Hz  
 FIDRES 0.094190 Hz  
 AQ 5.3084660 sec  
 RG 362  
 DM 81.000 usec  
 DE 6.00 usec  
 TE 300.0 K  
 D1 1.0000000 sec

===== CHANNEL f1 =====  
 NUC1 1H  
 P1 11.70 usec  
 PL1 0.00 dB  
 SF01 299.8718518 MHz

F2 - Processing parameters  
 SI 32768  
 SF 299.8700189 MHz  
 WDW EM  
 SSB 0  
 LB 0.30 Hz  
 GB 0  
 PC 1.00

1D NMR plot parameters  
 CX 20.00 cm  
 F1P 11.000 ppm  
 F1 3298.57 Hz  
 F2P -1.000 ppm  
 F2 -299.87 Hz  
 PPMCM 0.60000 ppm/cm  
 HZCM 179.92201 Hz/cm

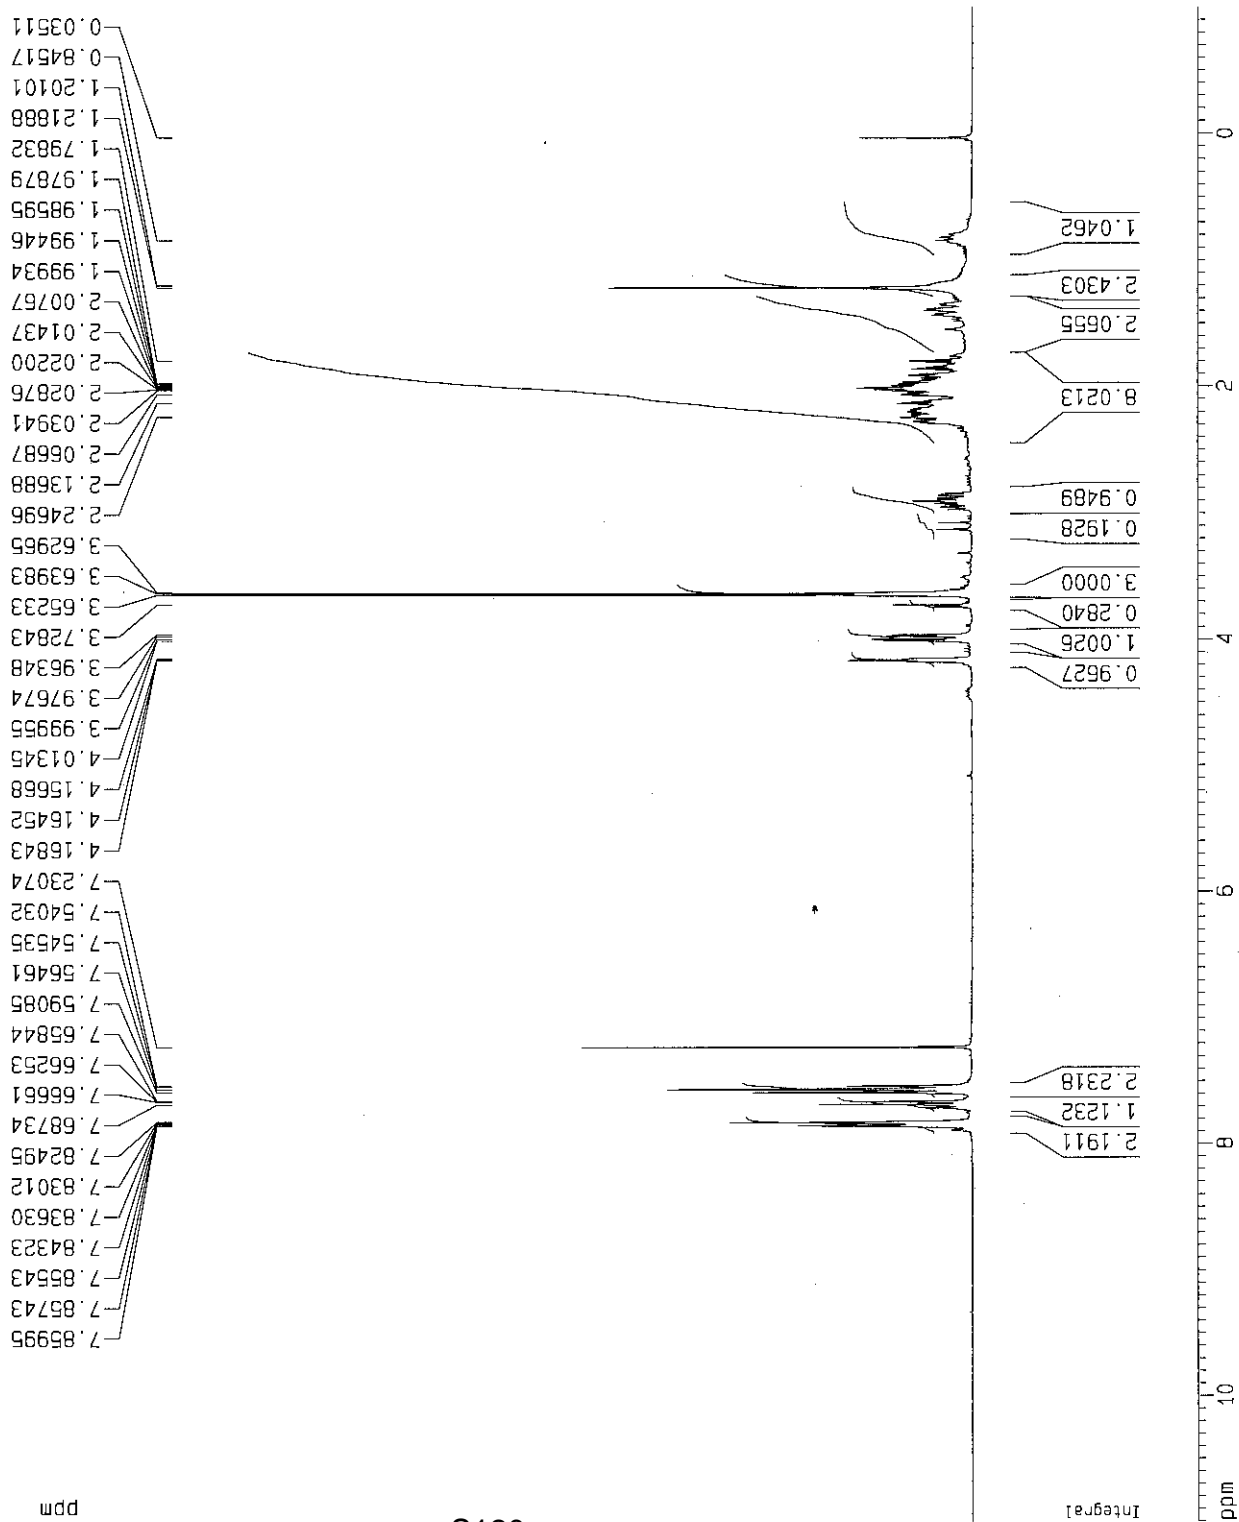



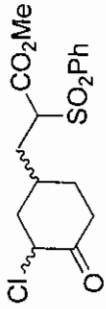

31

PL - II - p205 - P (mix)

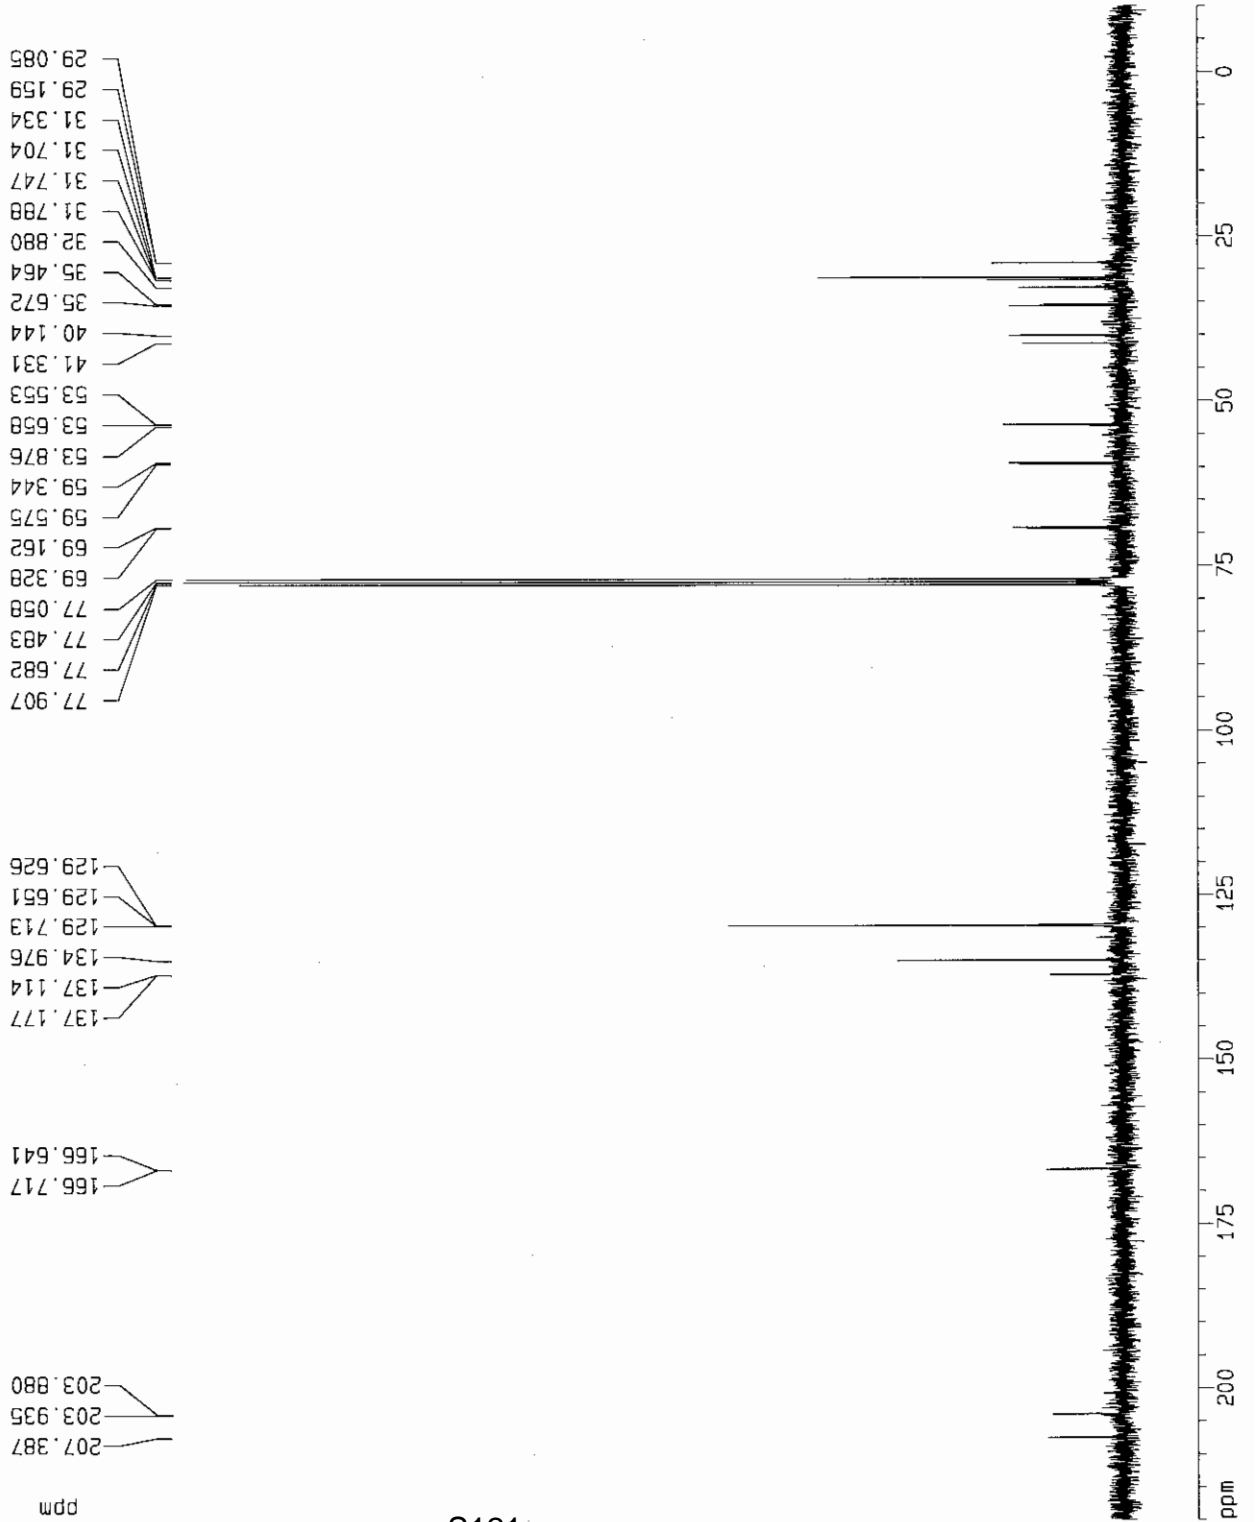

```

Current Data Parameters
NAME      Dec04-2010-Wein
EXPNO    21
PROCNO   1

F2 - Acquisition Parameters
Date_    20101204
Time     17.12
INSTRUM  spect
PROBHD   5 mm QNP 1H/1
PULPROG  zgpg30
TD       65536
SOLVENT  CDCl3
NS       541
DS       4
SWH      18796.992 Hz
FIDRES   0.286819 Hz
AQ       1.7433075 sec
RG       8192
DM       26.600 usec
DE       6.00 usec
TE       300.0 K
D1       2.00000000 sec
D11      0.03000000 sec
D12      0.00002000 sec

===== CHANNEL f1 =====
NUC1     13C
P1       5.40 usec
PL1      -6.00 dB
SF01     75.4105357 MHz

===== CHANNEL f2 =====
CPDPRG2  waltz16
NUC2     1H
PCPD2    115.00 usec
PL2      0.00 dB
PL12     20.00 dB
PL13     20.00 dB
SF02     299.8711995 MHz

F2 - Processing parameters
SI       32768
SF       75.4023410 MHz
WDW      EM
SSB      0
LB       1.00 Hz
GB       0
PC       1.40

10 NMR plot parameters
CX       20.00 cm
F1P     220.000 ppm
F1       16588.51 Hz
F2P     -10.000 ppm
F2       -754.02 Hz
PPMCM   11.50000 ppm/cm
HZCM    867.12695 Hz/cm
  
```

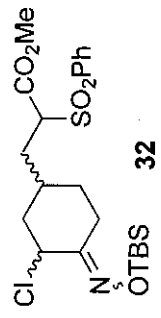

PL - II - p207 - P

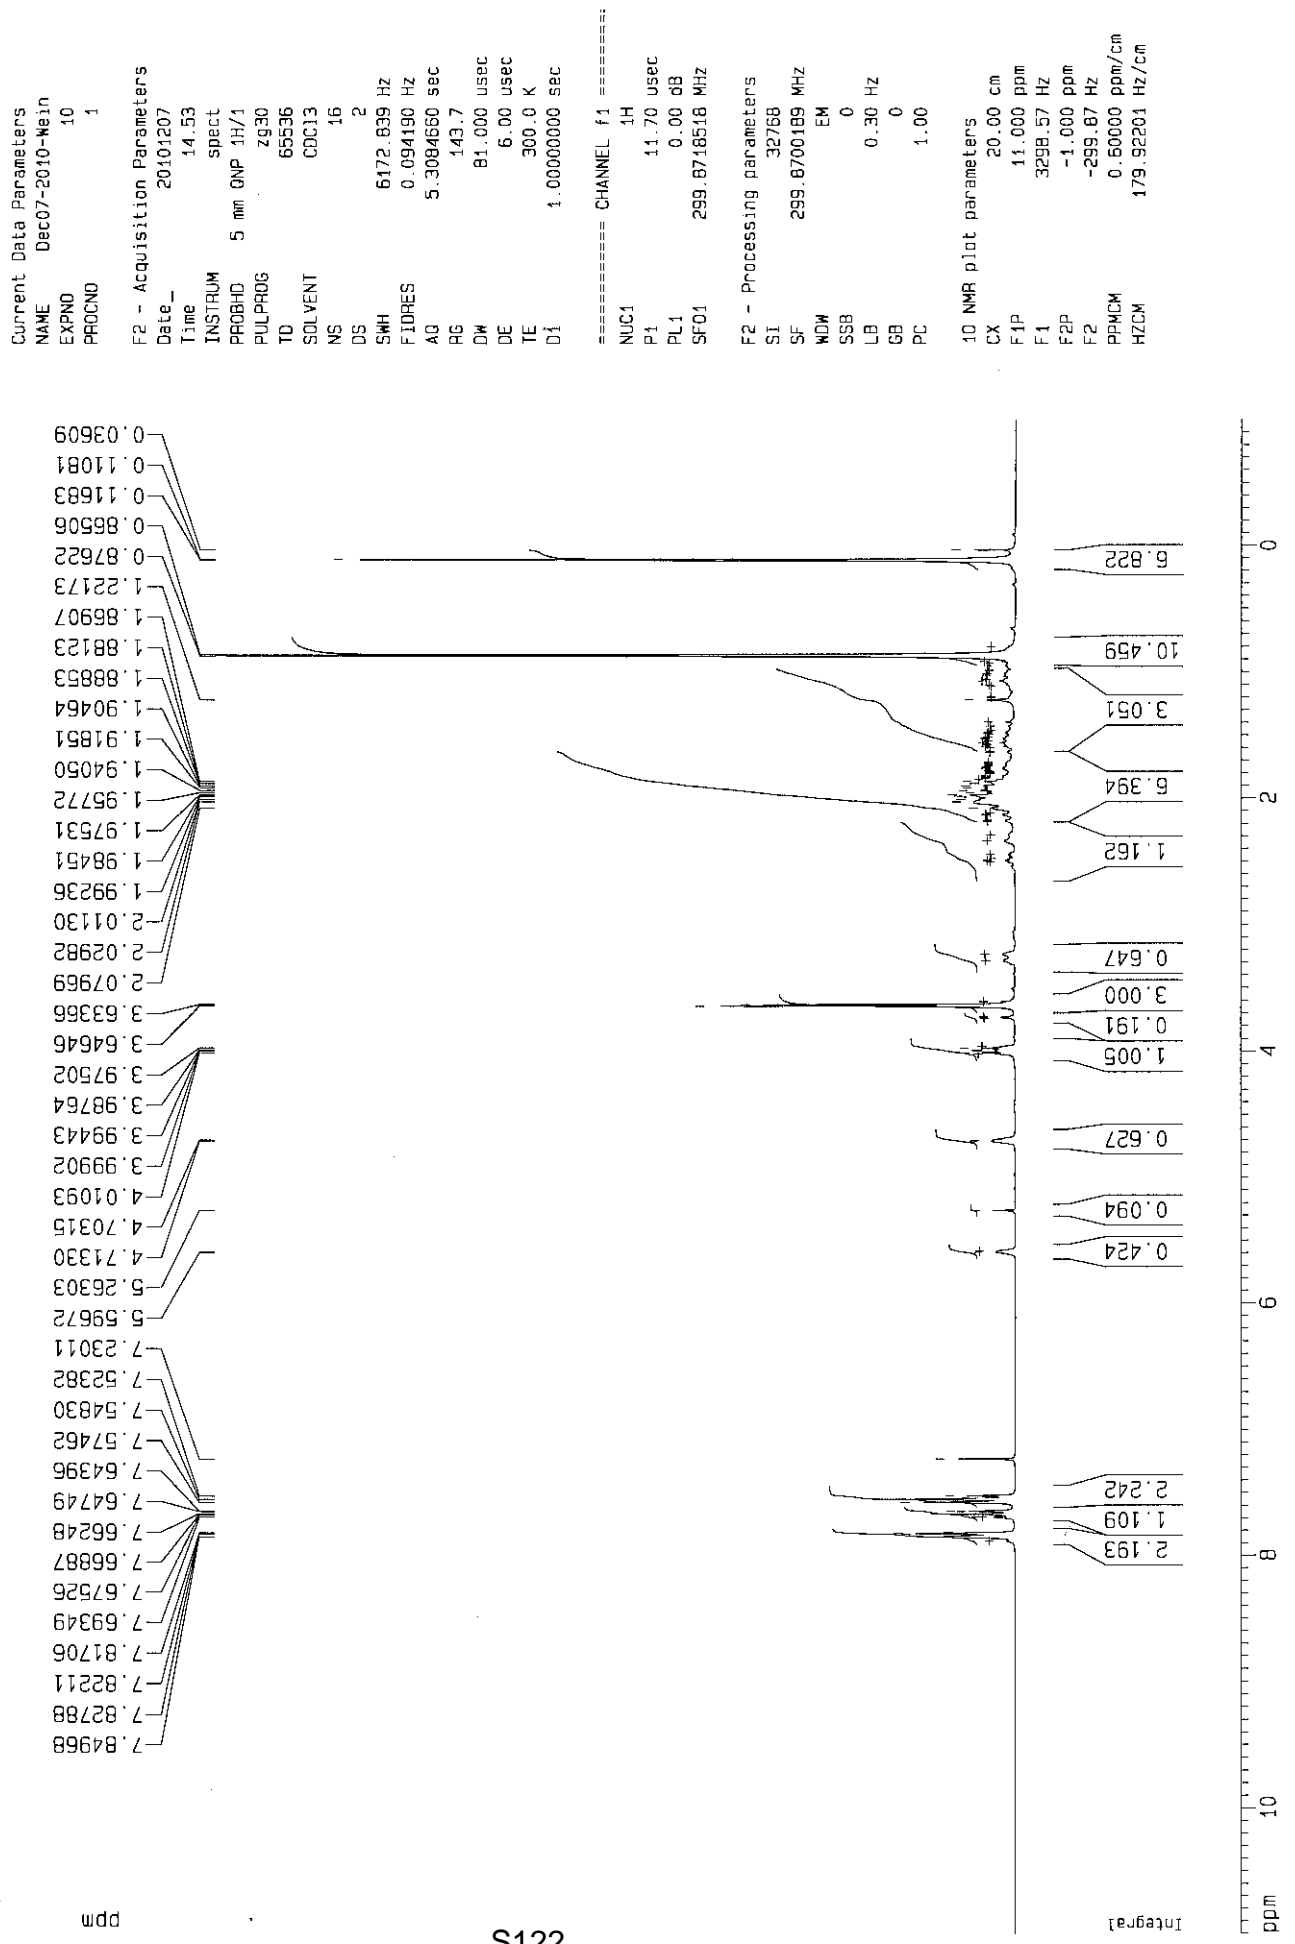

Current Data Parameters  
 NAME Dec07-2010-Wein  
 EXPNO 10  
 PROCNO 1

F2 - Acquisition Parameters  
 Date\_ 20101207  
 Time 14.53  
 INSTRUM spect  
 PROBHD 5 mm QNP 1H/1  
 PULPROG zg30  
 TD 65536  
 SOLVENT CDCl3  
 NS 16  
 DS 2  
 SWH 6172.839 Hz  
 FIDRES 0.094190 Hz  
 AQ 5.3084660 sec  
 RG 143.7  
 DW 81.000 usec  
 DE 6.00 usec  
 TE 300.0 K  
 D1 1.00000000 sec

==== CHANNEL f1 =====  
 NUC1 1H  
 P1 11.70 usec  
 PL1 0.00 dB  
 SF01 299.6718516 MHz

F2 - Processing parameters  
 SI 32768  
 SF 299.6700189 MHz  
 WDW EM  
 SSB 0  
 LB 0.30 Hz  
 GB 0  
 PC 1.00

10 NMR plot parameters  
 CX 20.00 cm  
 F1P 11.000 ppm  
 F1 3298.57 Hz  
 F2P -1.000 ppm  
 F2 -299.87 Hz  
 PPMCM 0.60000 ppm/cm  
 HZCM 179.92201 Hz/cm



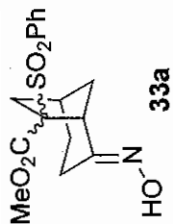

PL - II - p208 - P

Current Data Parameters  
 NAME Dec08-2010-Wein  
 EXPNO 10  
 PROCNO 1

F2 - Acquisition Parameters  
 Date\_ 20101208  
 Time 17.43  
 INSTRUM spect  
 PROBHD 5 mm QNP 1H/1  
 PULPROG zg30  
 TD 65536  
 SOLVENT CDCl<sub>3</sub>  
 NS 16  
 DS 2  
 SWH 6172.839 Hz  
 FIDRES 0.094190 Hz  
 AQ 5.3084660 sec  
 RG 322.5  
 DW 61.000 usec  
 DE 5.00 usec  
 TE 300.0 K  
 D1 1.0000000 sec

===== CHANNEL f1 =====  
 NUC1 1H  
 P1 11.70 usec  
 PL1 0.00 dB  
 SFO1 299.8718518 MHz

F2 - Processing parameters  
 SI 32768  
 SF 299.8700521 MHz  
 WDW EM  
 SSB 0  
 LB 0.30 Hz  
 GB 0  
 PC 1.00

1D NMR plot parameters  
 CX 20.00 cm  
 F1P 11.000 ppm  
 F1 3298.57 Hz  
 F2P -1.000 ppm  
 F2 -299.87 Hz  
 PPMCM 0.60000 ppm/cm  
 HZCM 179.92203 Hz/cm

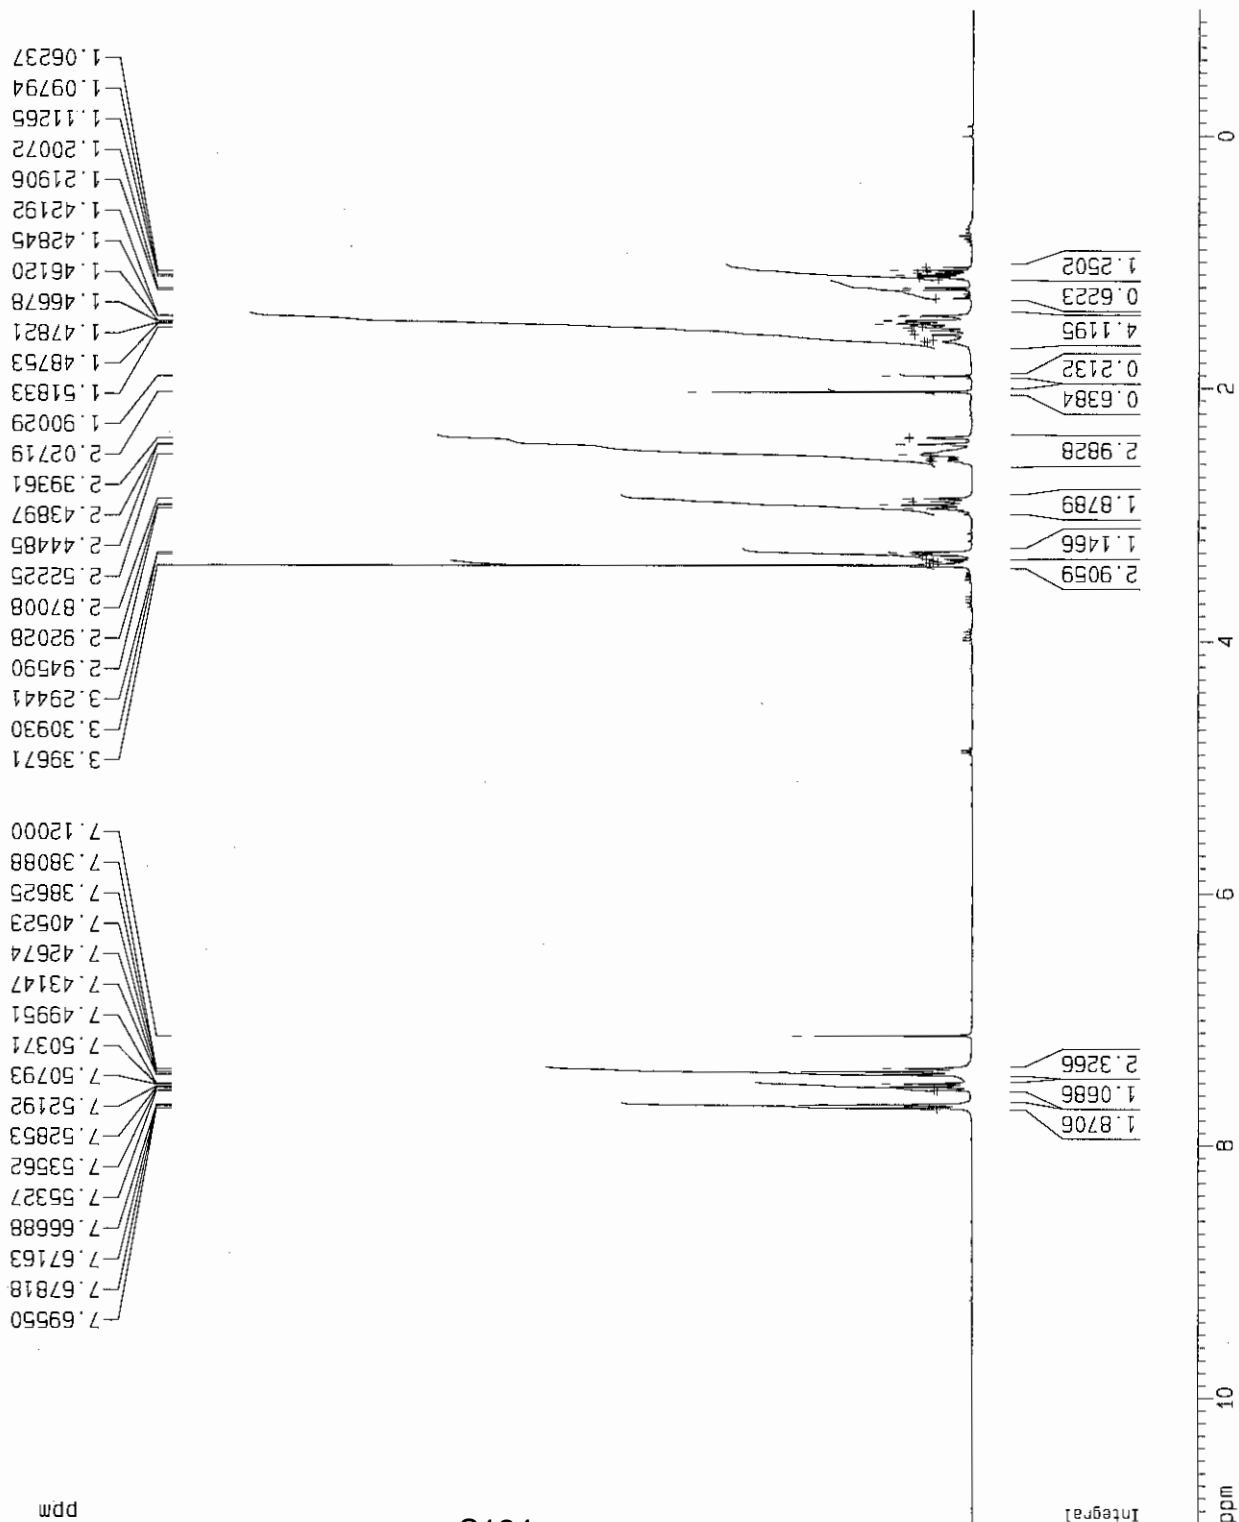

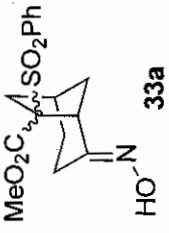

PL - II - 208 - P

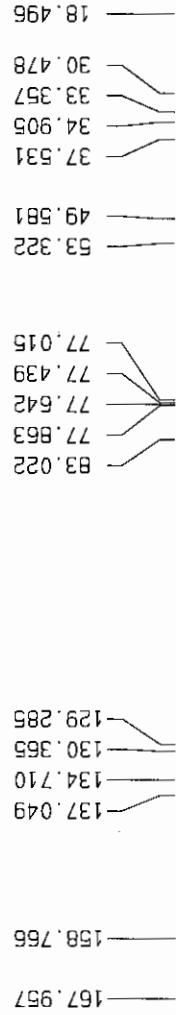

Current Data Parameters  
 NAME Dec08-2010-Wein  
 EXPNO 11  
 PROCNO 1

F2 - Acquisition Parameters  
 Date\_ 20101206  
 Time 17.47  
 INSTRUM spect  
 PROBHD 5 mm QNP 1H/1  
 PULPROG zgpg30  
 TD 65536  
 SOLVENT CDCl3  
 NS 1024  
 DS 4  
 SWH 18796.992 Hz  
 FIDRES 0.286619 Hz  
 AQ 1.7433076 sec  
 RG 16384  
 DM 26.600 usec  
 DE 6.00 usec  
 TE 300.0 K  
 D1 2.00000000 sec  
 D11 0.03000000 sec  
 D12 0.00002000 sec

==== CHANNEL f1 =====  
 NUC1 13C  
 P1 5.40 usec  
 PL1 -6.00 dB  
 SFO1 75.4106357 MHz

==== CHANNEL f2 =====  
 CPDPRG2 waltz16  
 NUC2 1H  
 PCPD2 115.00 usec  
 PL2 0.00 dB  
 PL12 20.00 dB  
 PL13 20.00 dB  
 SFO2 299.8711995 MHz

F2 - Processing parameters  
 SI 32768  
 SF 75.4023410 MHz  
 WDW EM  
 SSB 0  
 LB 1.00 Hz  
 GB 0  
 PC 1.40

1D NMR plot parameters  
 CX 20.00 cm  
 F1P 220.000 ppm  
 F1 16598.51 Hz  
 F2P -10.000 ppm  
 F2 -754.02 Hz  
 PPMCM 11.50000 ppm/cm  
 HZCM 867.12695 Hz/cm

ppm

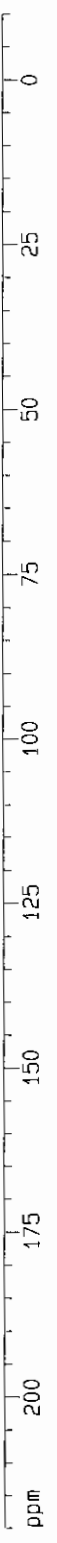



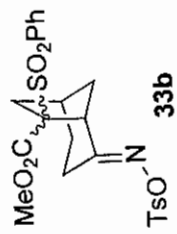

Punui\_Tosylate

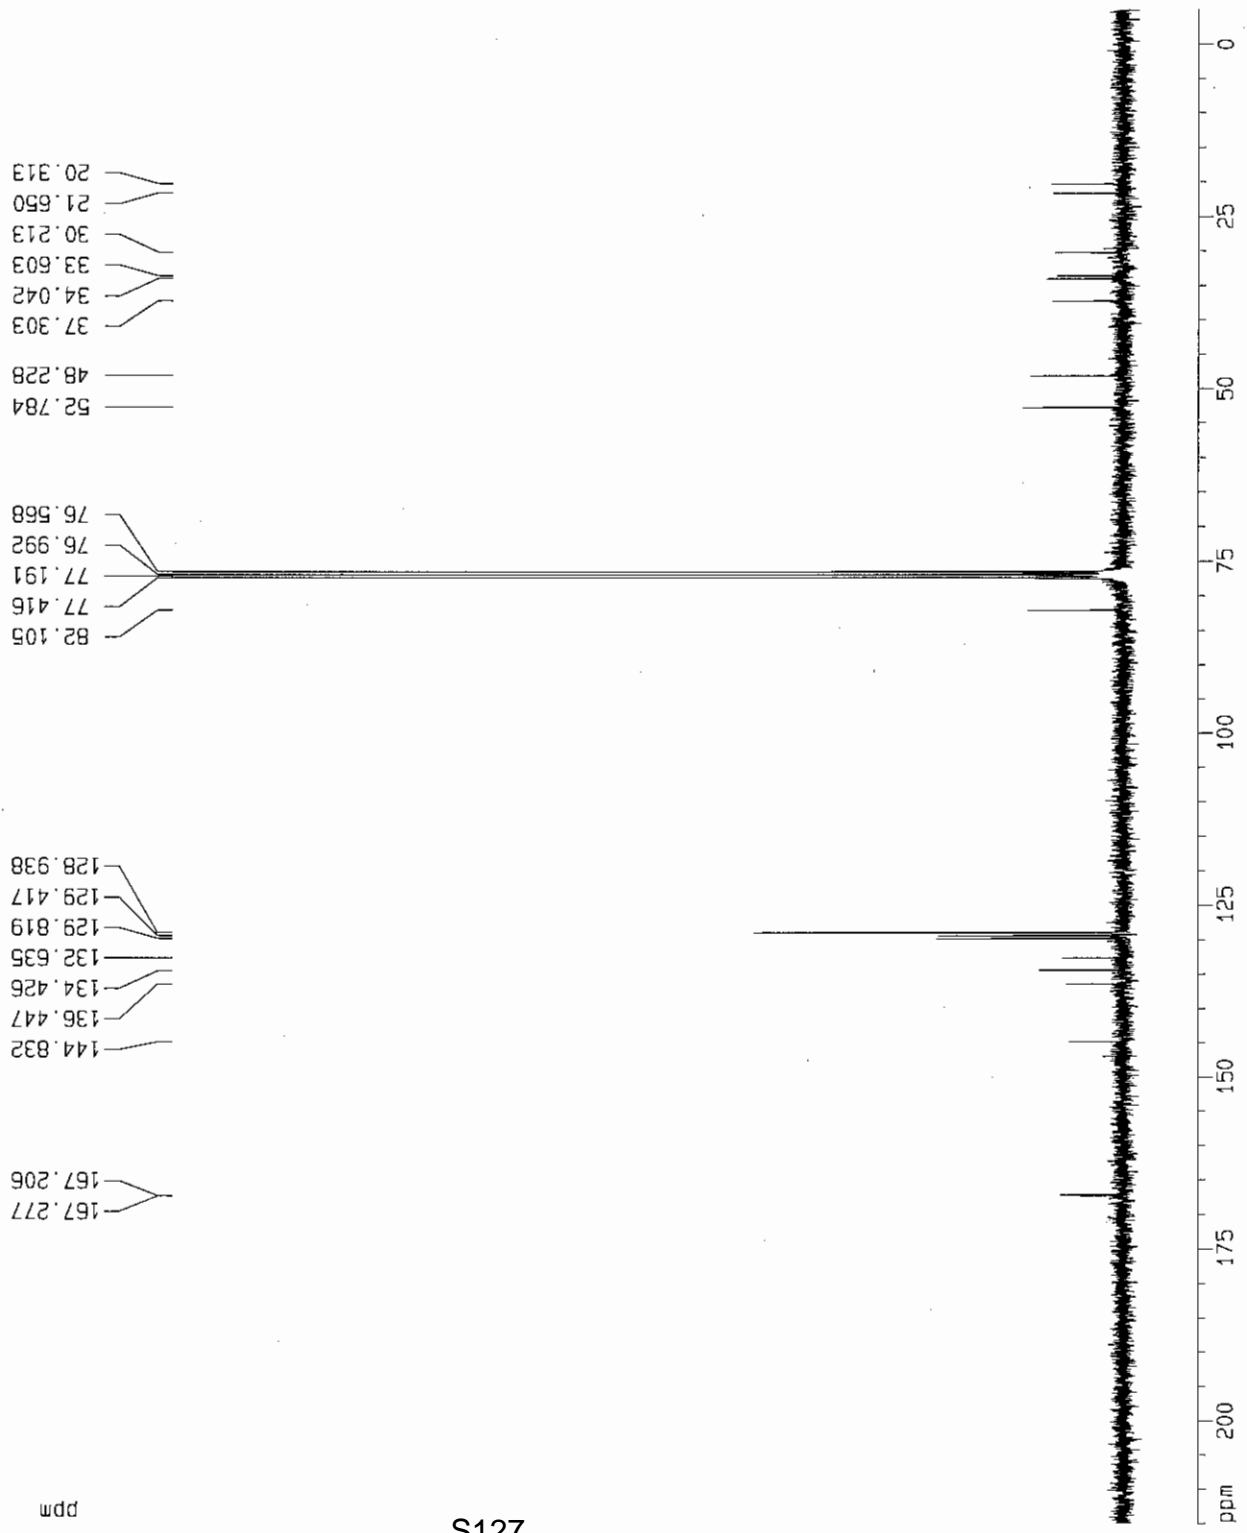

Current Data Parameters  
 NAME Dec10-2010-Wein  
 EXPNO 10  
 PROCNO 1  
 F2 - Acquisition Parameters  
 Date\_ 20101210  
 Time 10.33  
 INSTRUM spect  
 PROBHD 5 mm QNP 1H/1  
 PULPROG zgpg30  
 TD 65536  
 SOLVENT CDCl3  
 NS 3682  
 DS 4  
 SNH 18796.992 Hz  
 FIDRES 0.266819 Hz  
 AQ 1.7433076 sec  
 RG 16384  
 DM 26.600 usec  
 DE 6.00 usec  
 TE 300.0 K  
 D1 2.00000000 sec  
 D11 0.03000000 sec  
 DT2 0.00002000 sec

===== CHANNEL f1 =====  
 NUC1 13C  
 P1 5.40 usec  
 PL1 -6.00 dB  
 SF01 75.4105357 MHz

===== CHANNEL f2 =====  
 CPROG2 waltz15  
 NUC2 1H  
 PCPD2 115.00 usec  
 PL2 0.00 dB  
 PL12 20.00 dB  
 PL13 20.00 dB  
 SF02 299.8711995 MHz

F2 - Processing parameters  
 SI 32768  
 SF 75.4023741 MHz  
 MDW EM  
 SSB 0  
 LB 1.00 Hz  
 GB 0  
 PC 1.40  
 1D NMR plot parameters  
 CX 20.00 cm  
 F1P 215.000 ppm  
 F1 16211.51 Hz  
 F2P -5.000 ppm  
 F2 -377.01 Hz  
 PPMCM 11.00000 ppm/cm  
 HZCM 829.42615 Hz/cm

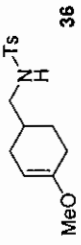

PL - II - p83 - P

Current Data Parameters  
 NAME Jun29-2010-wein  
 EXPNO 10  
 PROCNO 1

F2 - Acquisition Parameters  
 Date\_ 20100629  
 Time 16.24  
 INSTRUM spect  
 PRDBHD 5 mm QNP 1H/1  
 PULPROG zg30  
 TD 65536  
 SOLVENT CDCl3  
 NS 16  
 DS 2  
 SWH 6172.639 Hz  
 FIDRES 0.094190 Hz  
 AQ 5.3084660 sec  
 RG 128  
 DW 61.000 usec  
 DE 6.00 usec  
 TE 300.0 K  
 D1 1.0000000 sec

===== CHANNEL f1 =====  
 NUC1 1H  
 P1 11.70 usec  
 PL1 0.00 dB  
 SF01 299.8718518 MHz

F2 - Processing parameters  
 SI 32768  
 SF 299.8700275 MHz  
 WDW EM  
 SSB 0  
 LB 0.30 Hz  
 GB 0  
 PC 1.00

1D NMR plot parameters  
 CX 20.00 cm  
 F1P 11.000 ppm  
 F1 3298.57 Hz  
 F2P -1.000 ppm  
 F2 -299.87 Hz  
 PPMCM 0.50000 ppm/cm  
 HZCM 179.92201 Hz/cm

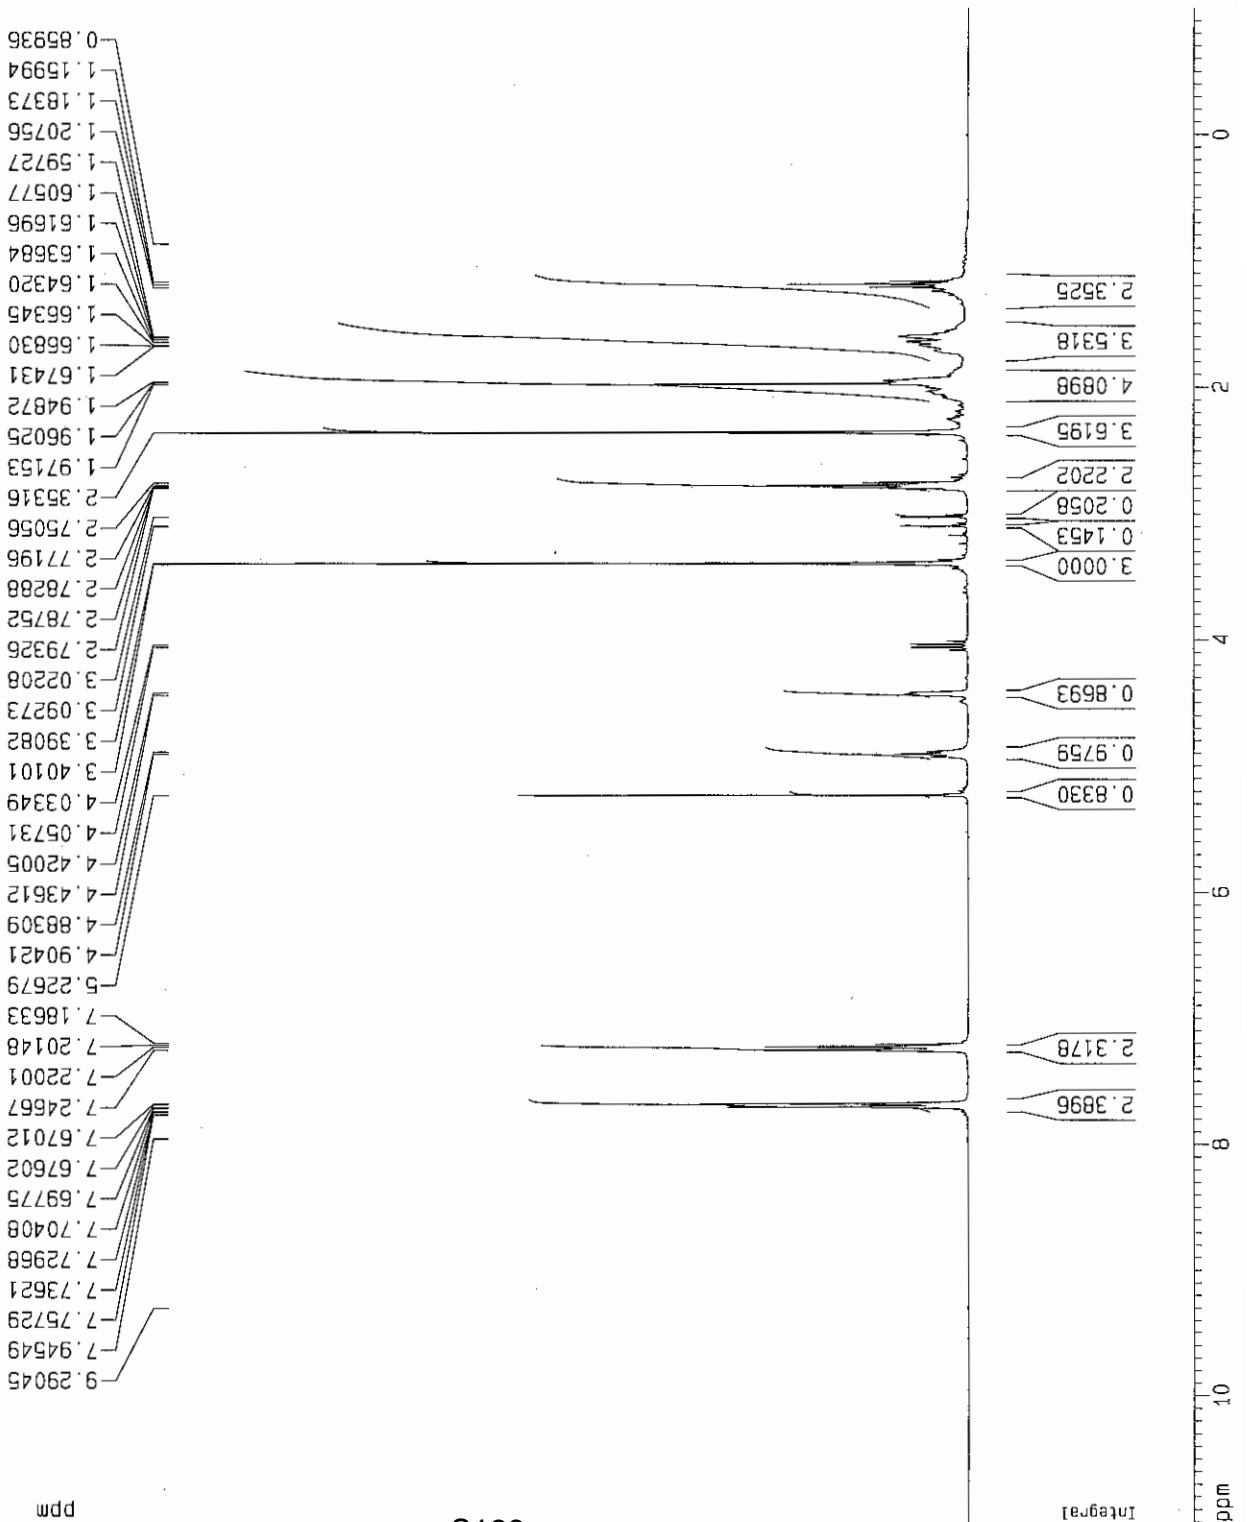

S128



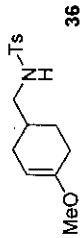

Current Data Parameters  
 NAME TH1-48c13  
 EXPNO 36201  
 PROCNO 1

F2 - Acquisition Parameters  
 Date\_ 20090702  
 Time\_ 17.26  
 INSTRUM spect  
 PROBHD 5 mm QNP 1H/1  
 PULPROG zgpg30  
 TD 65536  
 SOLVENT CDCl3  
 NS 1024  
 DS 4  
 SWH 18796.982 Hz  
 FIDRES 0.286819 Hz  
 AQ 1.7433075 sec  
 RG 1024  
 DW 26.600 usec  
 DE 6.00 usec  
 TE 300.0 K  
 D1 2.00000000 sec  
 D11 0.03000000 sec  
 D12 0.00002000 sec

===== CHANNEL f1 =====  
 NUC1 13C  
 P1 5.40 usec  
 PL1 -6.00 dB  
 SF01 75.4106357 MHz

===== CHANNEL f2 =====  
 CPDPRG2 waltz16  
 NUC2 1H  
 PCPD2 115.00 usec  
 PL2 0.00 dB  
 PL12 20.00 dB  
 PL13 20.00 dB  
 SF02 299.8711995 MHz

F2 - Processing parameters  
 SI 32768  
 SF 75.4023410 MHz  
 WDW EM  
 SSB 0  
 LB 1.00 Hz  
 GB 0  
 PC 1.40

1D NMR plot parameters  
 CX 20.00 cm  
 F1P 161.310 ppm  
 F1 12163.12 Hz  
 F2P 0.555 ppm  
 F2 42.64 Hz  
 PPMCM 6.03720 ppm/cm  
 HZCM 606.02399 Hz/cm

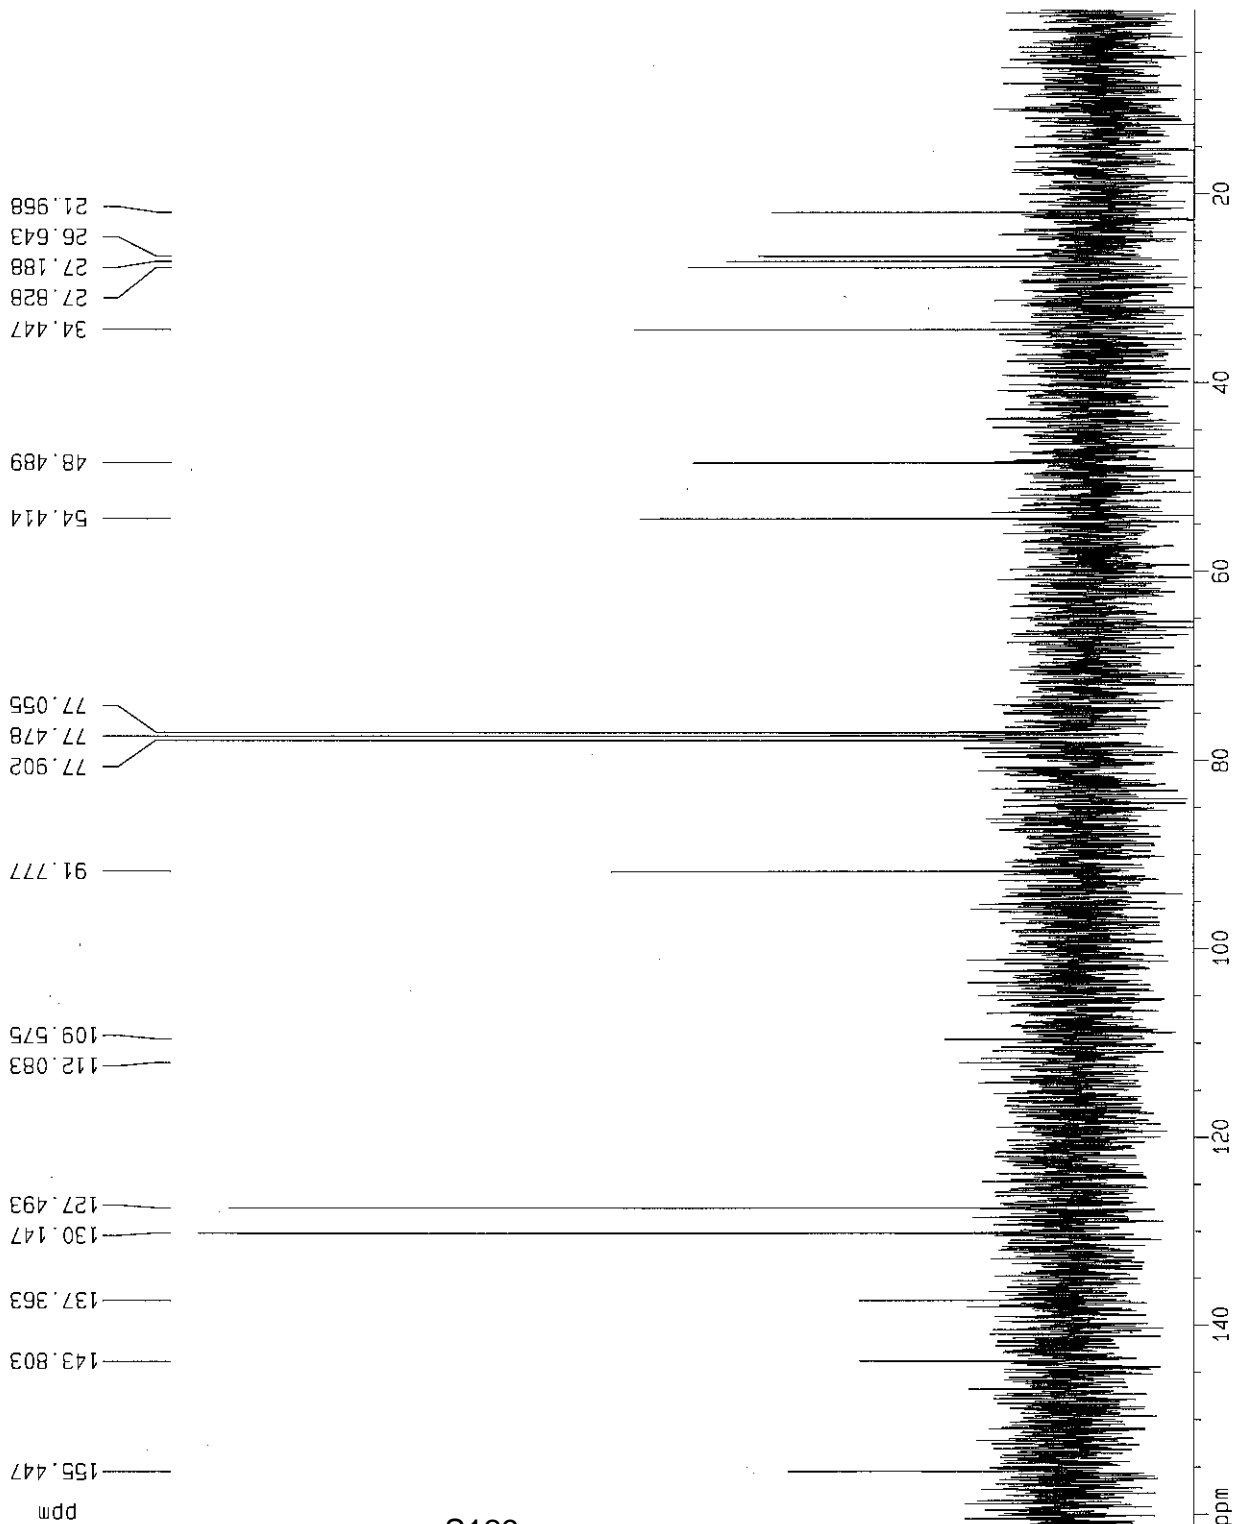

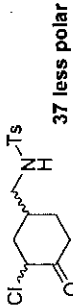

PL - II - p87 - P

Current Data Parameters  
 NAME Jul106-2010-Wein  
 EXPNO 10  
 PROCNO 1

F2 - Acquisition Parameters  
 Date\_ 20100706  
 Time 13.12  
 INSTRUM spect  
 PROBHD 5 mm GNP 1H/1  
 PULPROG zg30  
 TD 65536  
 SOLVENT CDCl3  
 NS 16  
 DS 2  
 SWH 6172.839 Hz  
 FIDRES 0.094190 Hz  
 AQ 5.3084560 sec  
 RG 114  
 DM 81.000 usec  
 DE 6.00 usec  
 TE 300.0 K  
 D1 1.0000000 sec

----- CHANNEL f1 -----  
 NUC1 1H  
 P1 11.70 usec  
 PL1 0.00 dB  
 SFO1 299.8718516 MHz

F2 - Processing parameters  
 SI 32768  
 SF 299.8700259 MHz  
 WDW EM  
 SSB 0  
 LB 0.30 Hz  
 GB 0  
 PC 1.00

1D NMR plot parameters  
 CX 20.00 cm  
 F1P 11.000 ppm  
 F1 3296.57 Hz  
 F2 -1.000 ppm  
 F2 -299.87 Hz  
 PPMCM 0.60000 ppm/cm  
 HZCM 179.92201 Hz/cm

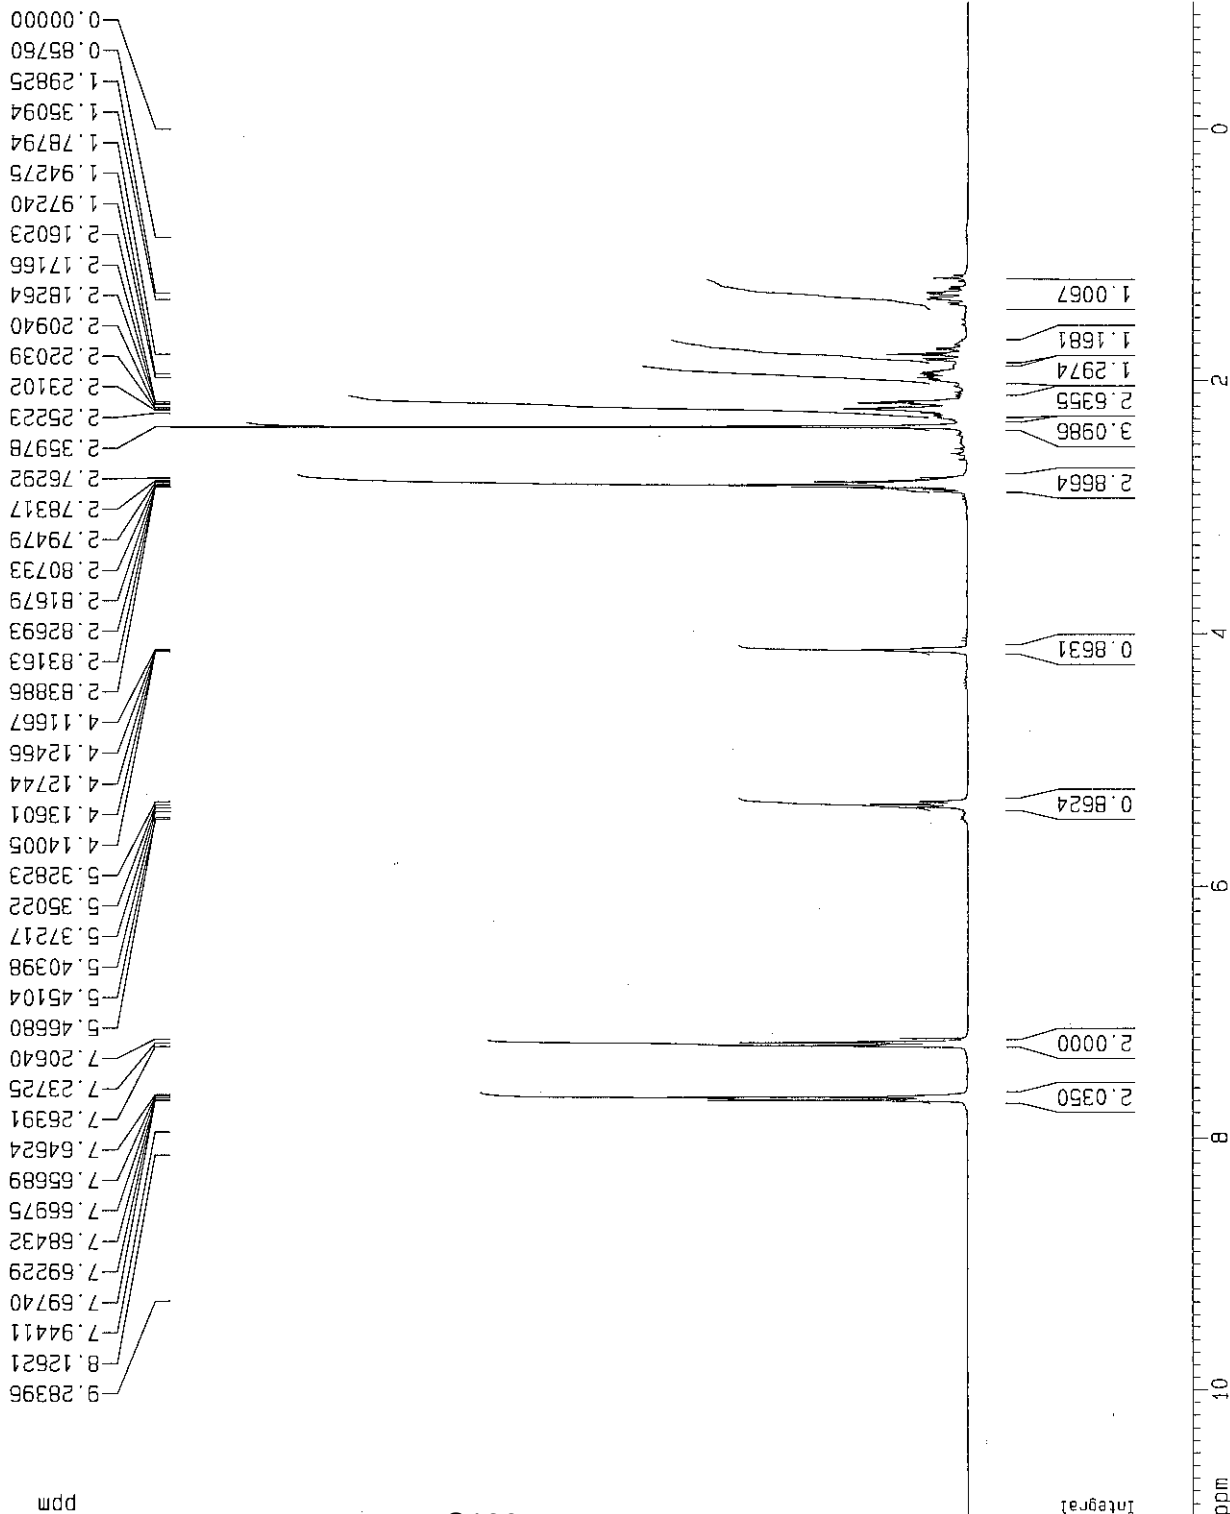

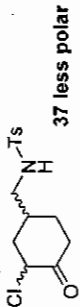

PL - II - p87 - P

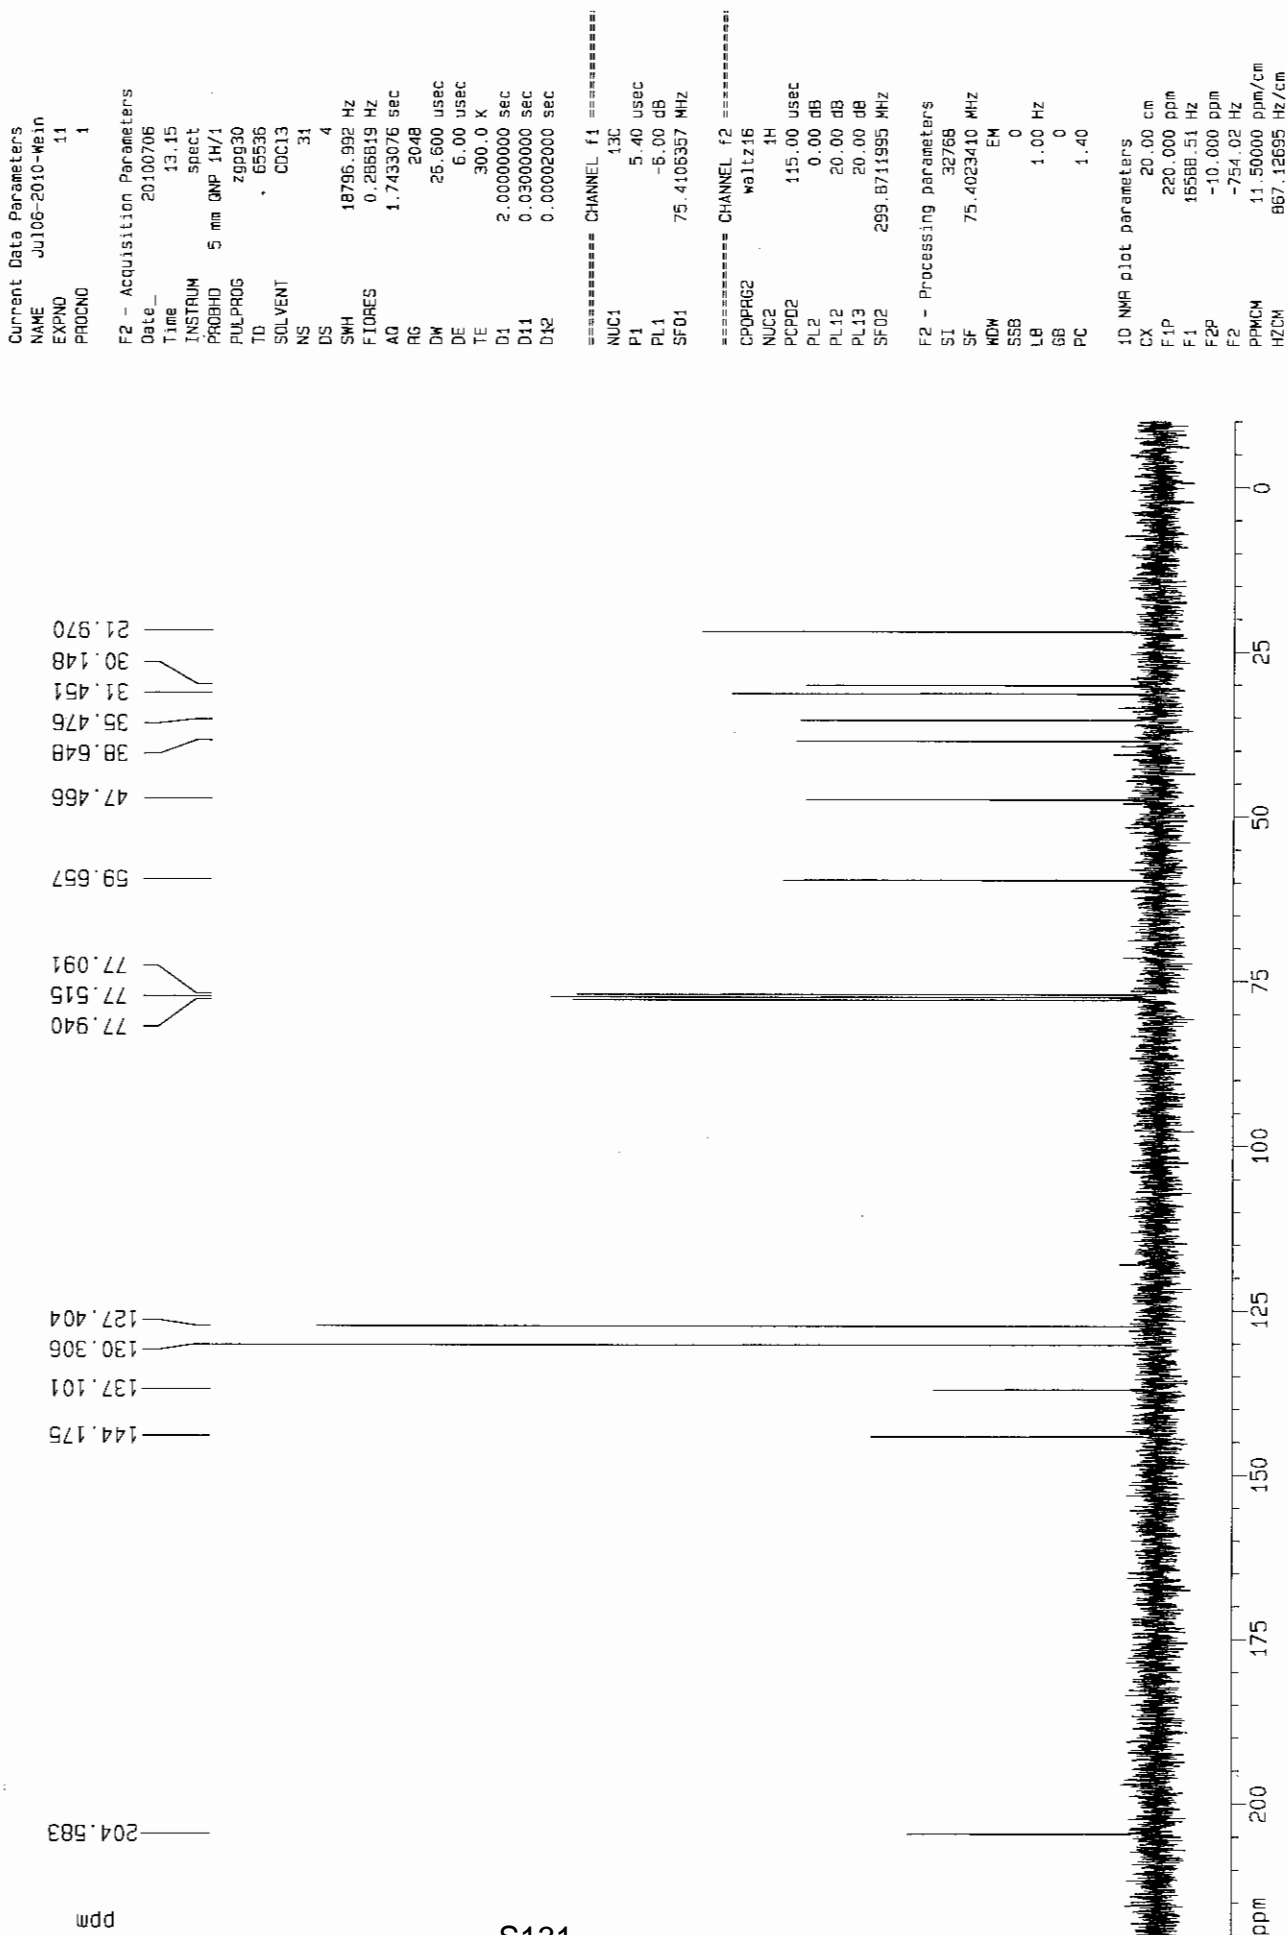

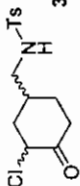

37 more polar

PL - II - p88 - P(3)

Current Data Parameters  
 NAME Jul10-2010-Wein  
 EXPNO 30  
 PROCNO 1

F2 - Acquisition Parameters  
 Date\_ 20100710  
 Time 16.24  
 INSTRUM spect  
 PROBH0 5 mm GNP 1H/1  
 PULPROG zg30  
 TD 65536  
 SOLVENT CDCl3  
 NS 16  
 DS 2  
 SWH 6172.839 Hz  
 FIDRES 0.094190 Hz  
 AQ 5.3084660 sec  
 RG 143.7  
 DW 81.000 usec  
 DE 6.00 usec  
 TE 300.0 K  
 D1 1.00000000 sec

===== CHANNEL f1 =====  
 NUC1 1H  
 P1 11.70 usec  
 PL1 0.00 dB  
 SF01 299.8718518 MHz

F2 - Processing parameters  
 SI 32768  
 SF 299.8700257 MHz  
 WDW EM  
 SSB 0  
 LB 0.30 Hz  
 GB 0  
 PC 1.00

1D NMR plot parameters  
 CX 20.00 cm  
 F1P 11.000 ppm  
 F1 3298.57 Hz  
 F2P -1.000 ppm  
 F2 -299.87 Hz  
 PPMCM 0.160000 ppm/cm  
 HZCM 179.92201 Hz/cm

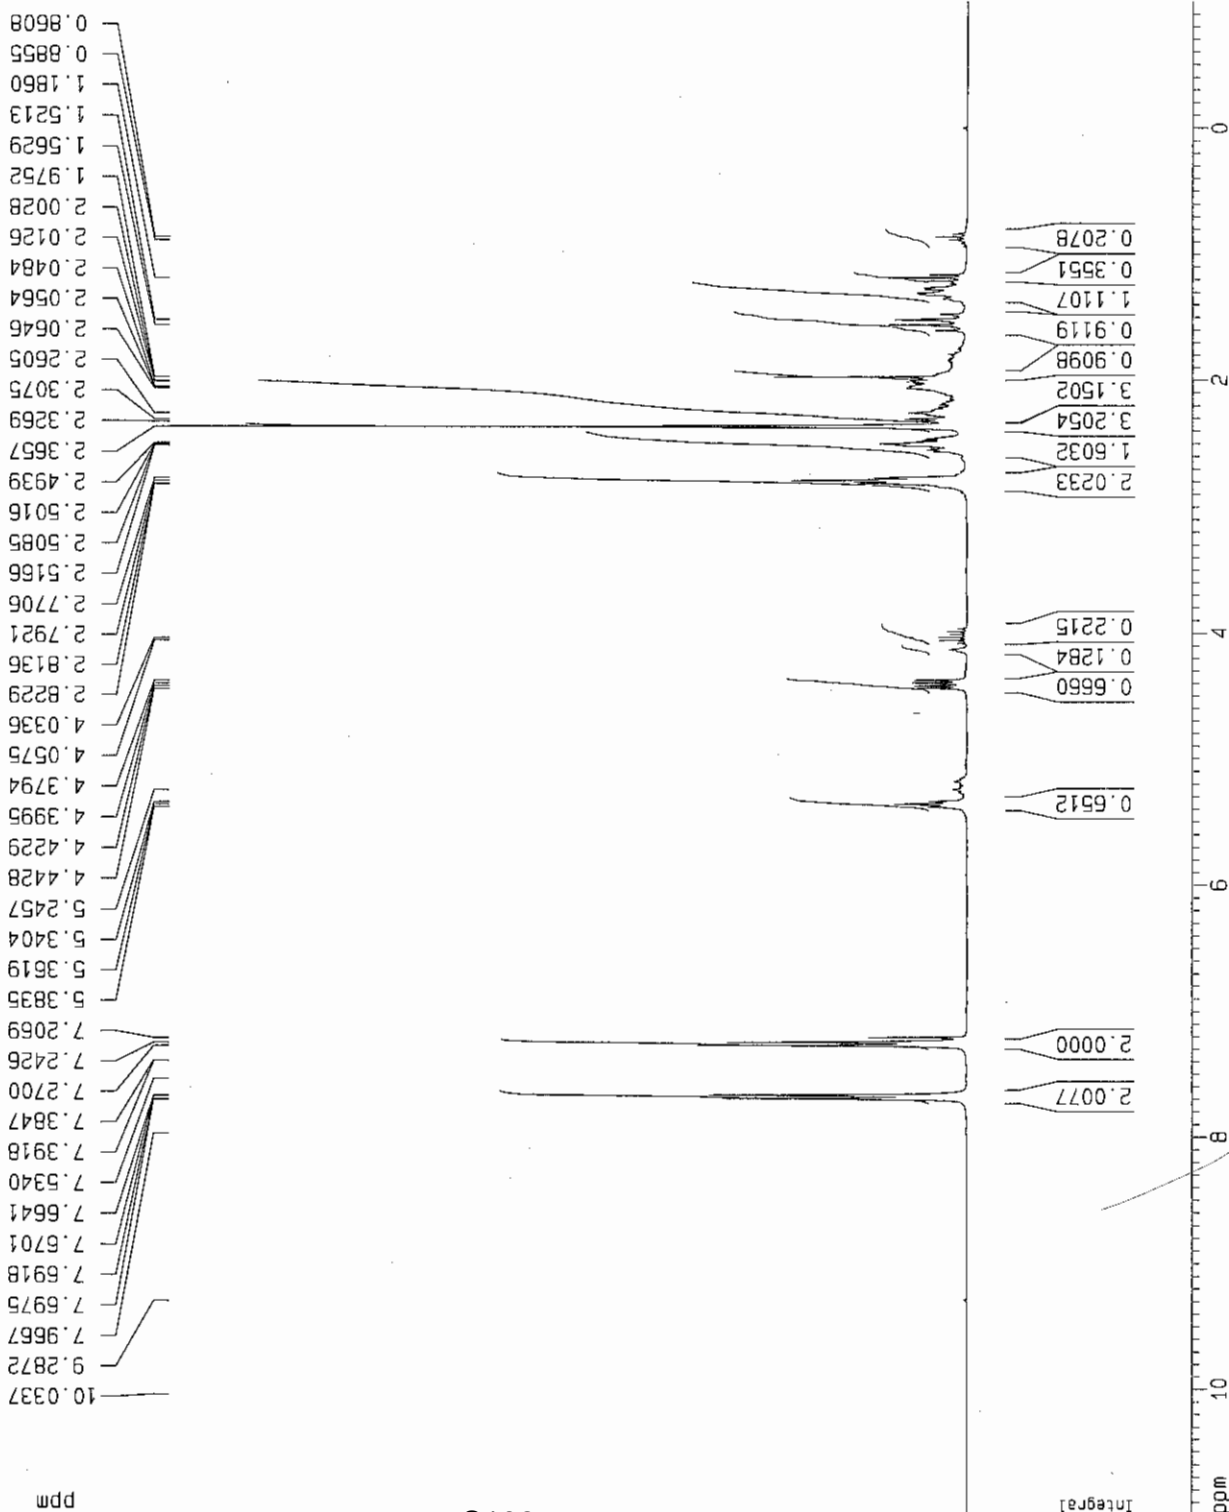

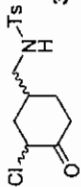

37 more polar

PL - II - p88 - P (3)

202.304  
144.259  
136.962  
130.313  
127.421  
77.920  
77.496  
77.072  
63.207  
47.646  
42.116  
39.934  
37.804  
30.662  
21.973

S133

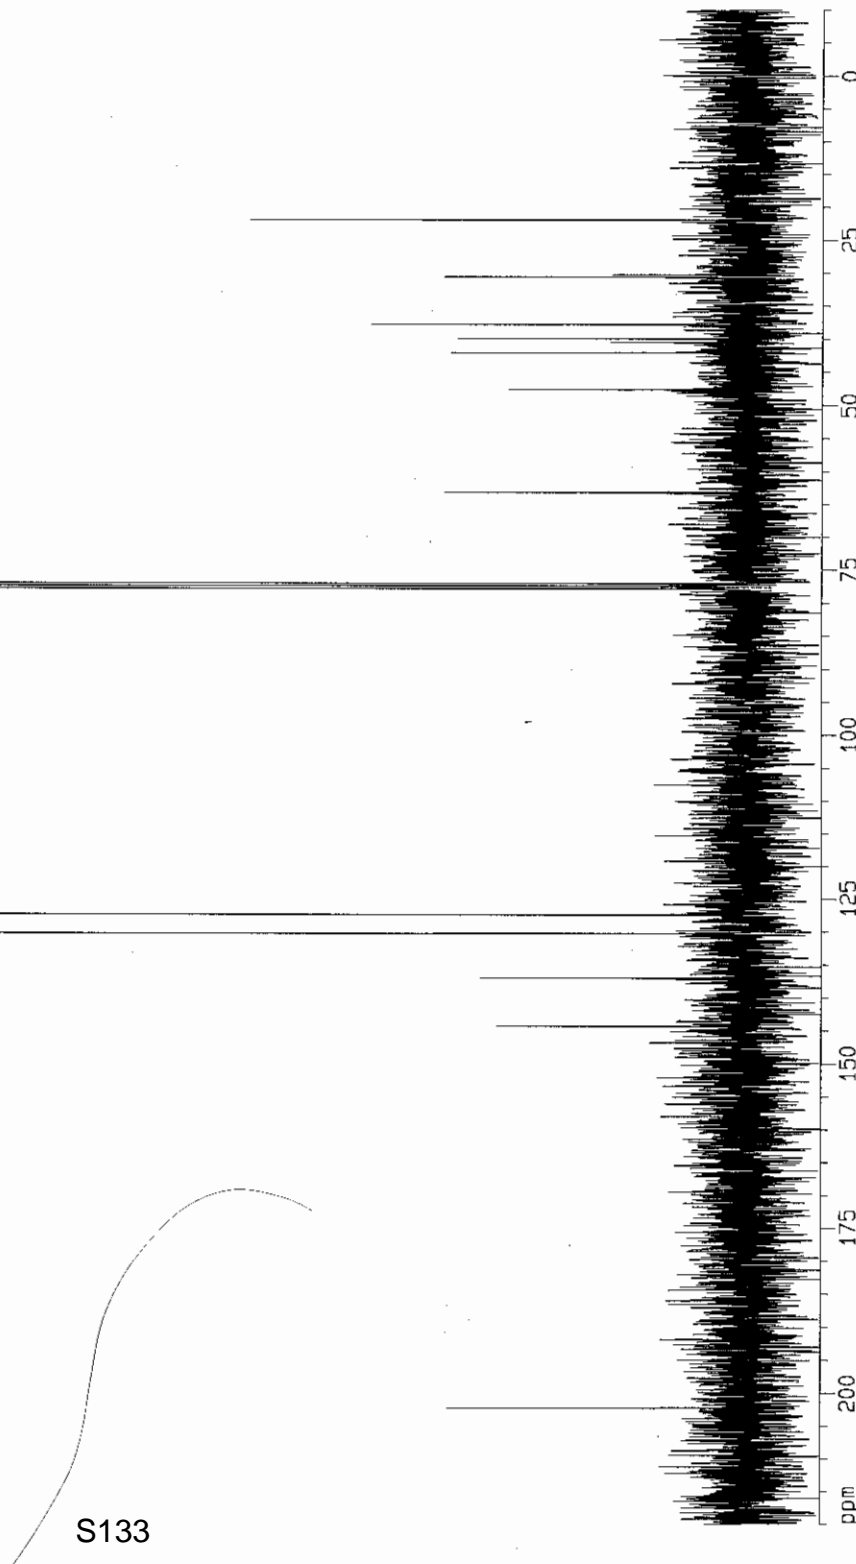

Current Data Parameters  
 NAME JU110-2010-Wein  
 EXPNO 34  
 PROCNO 1

F2 - Acquisition Parameters  
 Date\_ 20100710  
 Time 16.41  
 INSTRUM spect  
 PROBHD 5 mm QNP 1H/1  
 PULPROG zgpg30  
 TD 65536  
 SOLVENT CDCl3  
 NS 15  
 DS 4  
 SWH 18796.982 Hz  
 FIDRES 0.286819 Hz  
 AQ 1.7433076 sec  
 RG 4096  
 DM 26.600 usec  
 DE 6.00 usec  
 TE 300.0 K  
 D1 2.0000000 sec  
 D11 0.0300000 sec  
 D12 0.0000200 sec

===== CHANNEL f1 =====  
 NUC1 13C  
 P1 5.40 usec  
 PL1 -6.00 dB  
 SF01 75.4106357 MHz

===== CHANNEL f2 =====  
 CPOPRG2 waltz16  
 NUC2 1H  
 PCPD2 115.00 usec  
 PL2 0.00 dB  
 PL12 20.00 dB  
 PL13 20.00 dB  
 SF02 299.8711995 MHz

F2 - Processing parameters  
 SI 32768  
 SF 75.4023410 MHz  
 WDW EM  
 SSB 0  
 LB 1.00 Hz  
 GB 0  
 PC 1.40

10 NMR plot parameters  
 CX 20.00 cm  
 F1P 220.000 ppm  
 F1 16588.51 Hz  
 F2P -10.000 ppm  
 F2 -754.02 Hz  
 PPMCM 11.50000 ppm/cm  
 HZCM 867.12695 Hz/cm

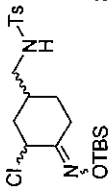

38

PL - II - p93 - P

Current Data Parameters  
 NAME Jul14-2010-Wein  
 EXPNO 20  
 PROCNO 1

F2 - Acquisition Parameters  
 Date\_ 20100714  
 Time 21:27  
 INSTRUM spect  
 PROBHD 5 mm Multinu  
 PULPROG zg30  
 TD 65536  
 SOLVENT CDCl3  
 NS 16  
 DS 2  
 SWH 6172.839 Hz  
 FIDRES 0.094190 Hz  
 AQ 5.3084660 sec  
 RG 80.6  
 DW 81.000 usec  
 DE 6.00 usec  
 TE 300.0 K  
 D1 1.0000000 sec

==== CHANNEL f1 =====

NUC1 1H  
 P1 9.60 usec  
 PL1 -6.00 dB  
 SF01 300.1318534 MHz

F2 - Processing parameters  
 SI 32768  
 SF 300.1300470 MHz  
 NDM EM  
 SSB 0  
 LB 0.30 Hz  
 GB 0  
 PC 1.00

1D NMR plot parameters  
 CX 20.00 cm  
 F1P 11.000 ppm  
 F1 3301.43 Hz  
 F2P -1.000 ppm  
 F2 -300.13 Hz  
 PPMCM 0.60000 ppm/cm  
 HZCM 180.07802 Hz/cm

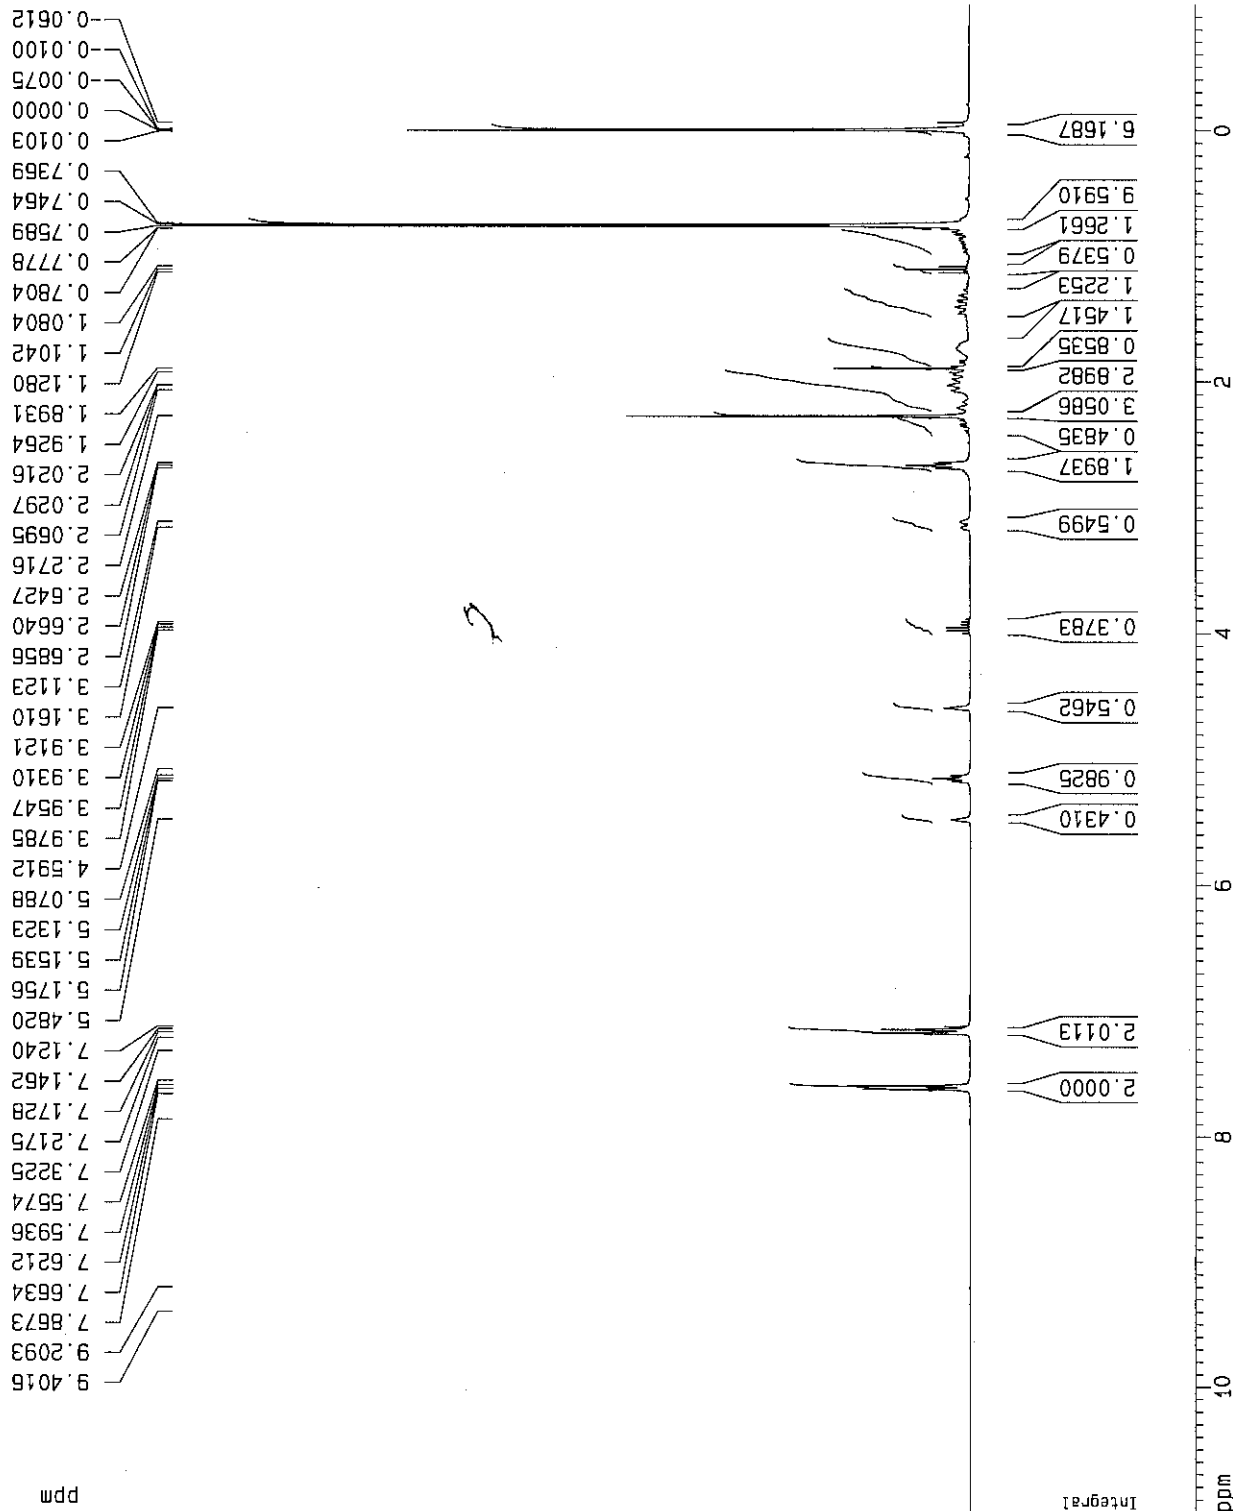

S134

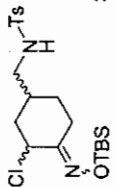

38

PL - II - p89 - P (2)

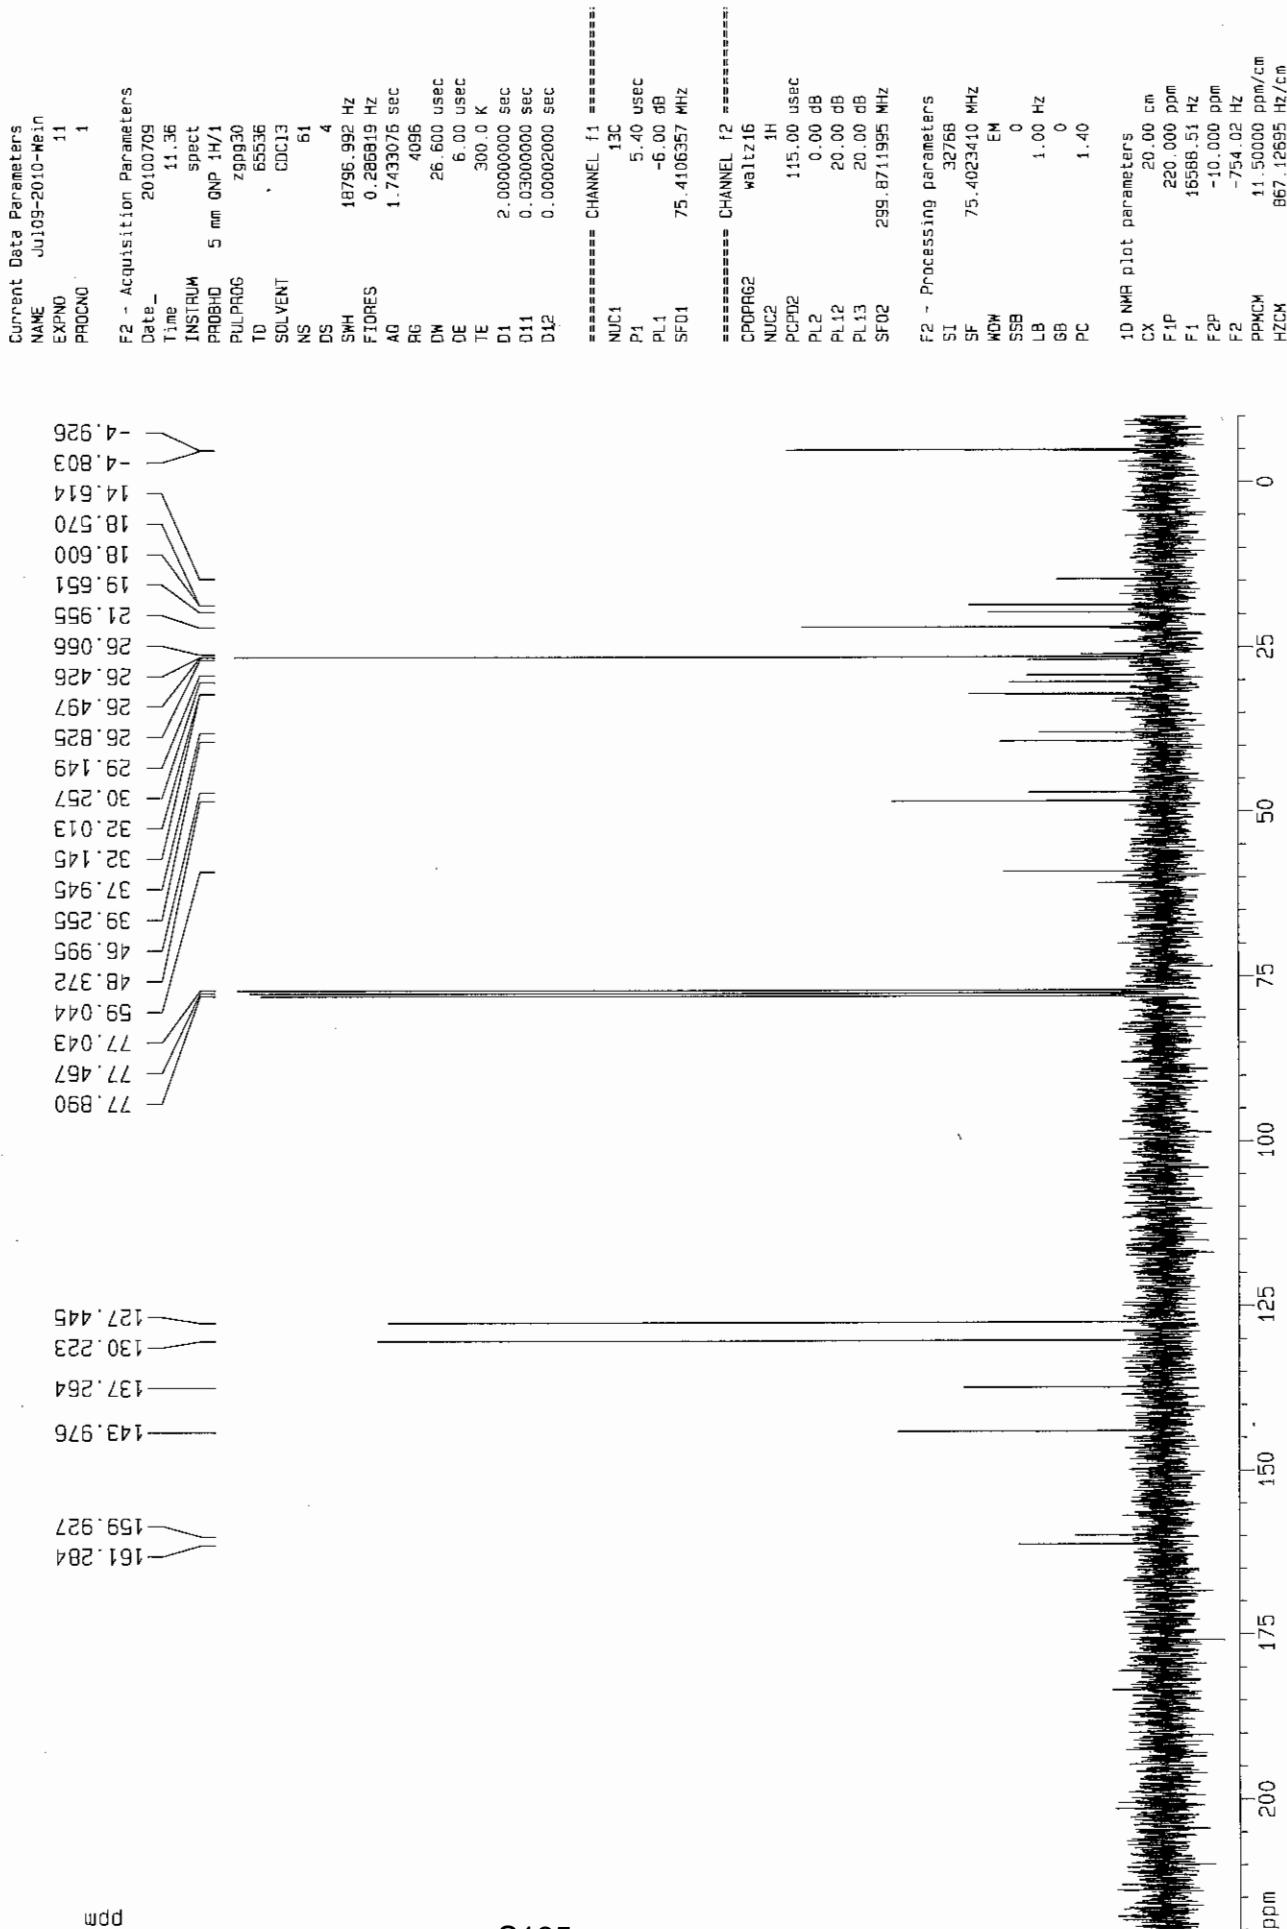

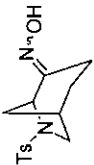

39

PL - II - p94 - P

Current Data Parameters  
 NAME Jul15-2010-wein  
 EXPNO 30  
 PROCNO 1

F2 - Acquisition Parameters  
 Date\_ 20100715  
 Time 21.12  
 INSTRUM spect  
 PROBHD 5 mm QNP 1H/1  
 PULPROG zg30  
 TD 65536  
 SOLVENT CDCl3  
 NS 16  
 DS 2  
 SWH 6172.839 Hz  
 FIDRES 0.094190 Hz  
 AQ 5.3084660 sec  
 RG 203.2  
 DW 81.000 usec  
 DE 6.00 usec  
 TE 300.0 K  
 D1 1.00000000 sec

===== CHANNEL f1 =====  
 NUC1 1H  
 P1 11.70 usec  
 PL1 0.00 dB  
 SFO1 299.8718518 MHz

F2 - Processing parameters  
 SI 32768  
 SF 299.8700382 MHz  
 WDW EM  
 SSB 0  
 LB 0.30 Hz  
 GB 0  
 PC 1.00

1D NMR plot parameters  
 CX 20.00 cm  
 F1P 11.000 ppm  
 F1 3298.57 Hz  
 F2P -1.000 ppm  
 F2 -299.87 Hz  
 PPMCM 0.60000 ppm/cm  
 HZCM 179.92201 Hz/cm

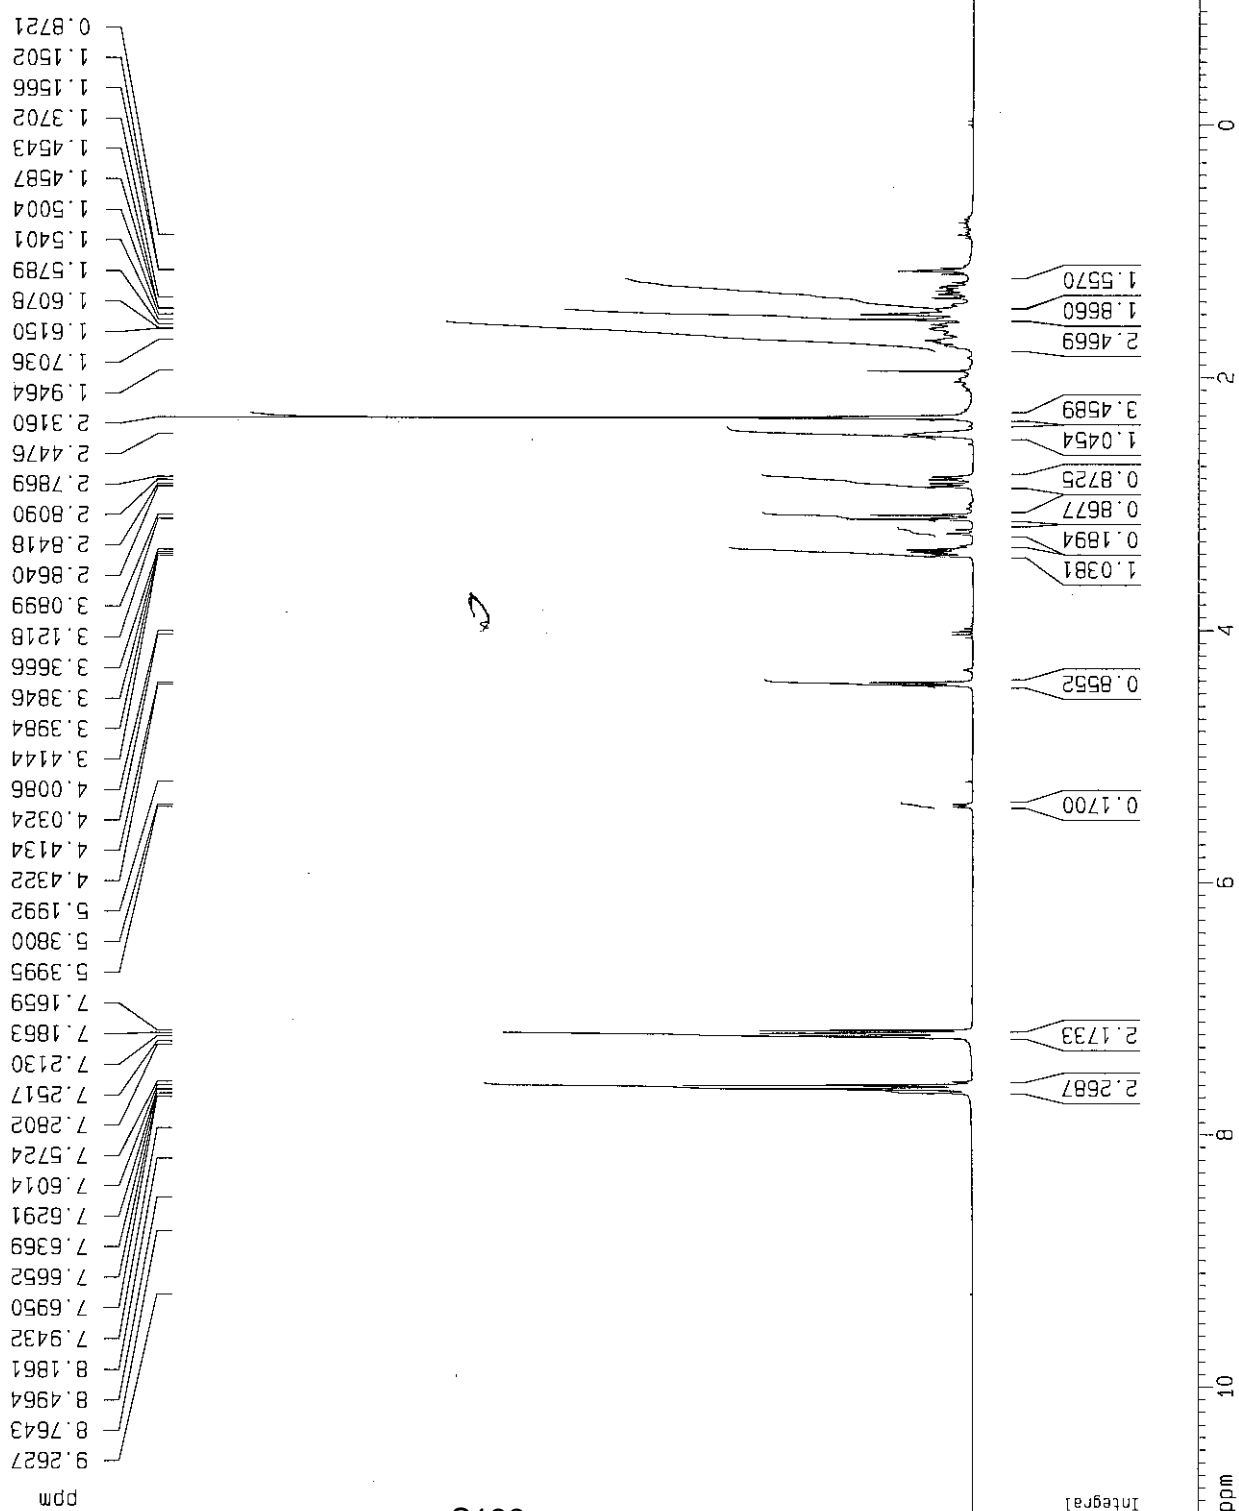

S136



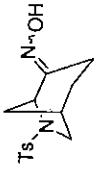

39

PL - II - p94 - P

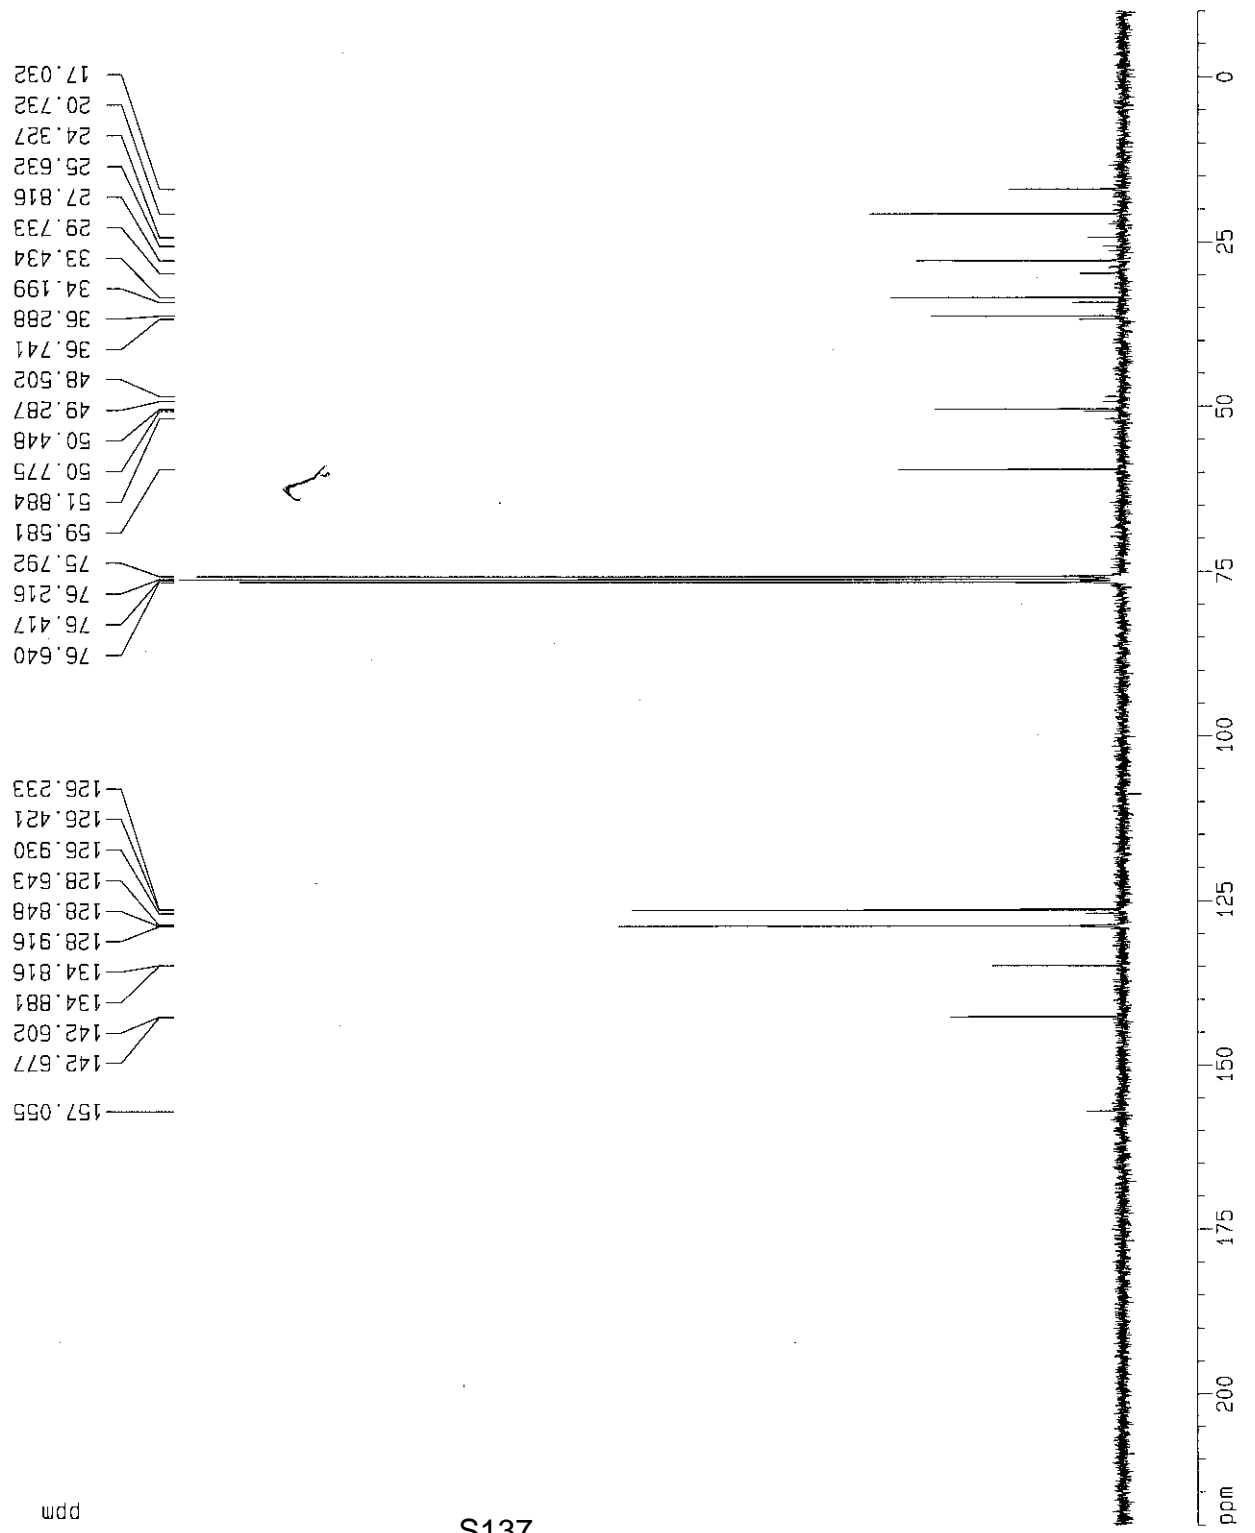

Current Data Parameters  
 NAME Jul15-2010-Main  
 EXPNO 31  
 PROCNO 1

F2 - Acquisition Parameters  
 Date\_ 20100715  
 Time 22.08  
 INSTRUM spect  
 PROBHD 5 mm QNP 1H/1  
 PULPRG zpg30  
 TD 65536  
 SOLVENT CDCl3  
 NS 875  
 DS 4  
 SWH 18796.992 Hz  
 FIDRES 0.286819 Hz  
 AQ 1.7433076 sec  
 RG 2048  
 DM 26.600 usec  
 DE 6.00 usec  
 TE 300.0 K  
 D1 2.00000000 sec  
 D11 0.03000000 sec  
 D12 0.00002000 sec

===== CHANNEL f1 =====  
 NUC1 13C  
 P1 5.40 usec  
 PL1 -6.00 dB  
 SF01 75.4106357 MHz

===== CHANNEL f2 =====  
 CPOPRG2 waltz16  
 NUC2 1H  
 PCPD2 115.00 usec  
 PL2 0.00 dB  
 PL12 20.00 dB  
 PL13 20.00 dB  
 SF02 299.8711995 MHz

F2 - Processing parameters  
 SI 32768  
 SF 75.4024348 MHz  
 WDW EM  
 SSB 0  
 LB 1.00 Hz  
 GB 0  
 PC 1.40

1D NMR plot parameters  
 CX 20.00 cm  
 FIP 220.000 ppm  
 F1 16588.54 Hz  
 F2 -10.000 ppm  
 F2 -754.03 Hz  
 PPMCM 11.50000 ppm/cm  
 HZCM 867.12799 Hz/cm

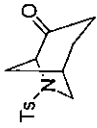

40

PL - II - p95 - P

Current Data Parameters  
 NAME Jul19-2010-wein  
 EXPNO 10  
 PROCNO 1

F2 - Acquisition Parameters  
 Date\_ 20100719  
 Time 11.21  
 INSTRUM spect  
 PROBHD 5 mm GNP 1H/1  
 PULPROG zg30  
 TD 65536  
 SOLVENT CDCl3  
 NS 16  
 DS 2  
 SWH 6172.839 Hz  
 FIDRES 0.094190 Hz  
 AQ 5.3084660 sec  
 RG 352  
 DW 81.000 usec  
 DE 6.00 usec  
 TE 300.0 K  
 D1 1.00000000 sec

----- CHANNEL f1 -----  
 NUC1 1H  
 P1 11.70 usec  
 PL1 0.00 dB  
 SF01 299.8718518 MHz

F2 - Processing parameters  
 SI 32768  
 SF 299.8700283 MHz  
 WDW EM  
 SSB 0  
 LB 0.30 Hz  
 GB 0  
 PC 1.00

1D NMR plot parameters  
 CX 20.00 cm  
 F1P 11.000 ppm  
 F1 3298.57 Hz  
 F2P -1.000 ppm  
 F2 -299.87 Hz  
 PPMCM 0.60000 ppm/cm  
 HZCM 179.92201 Hz/cm

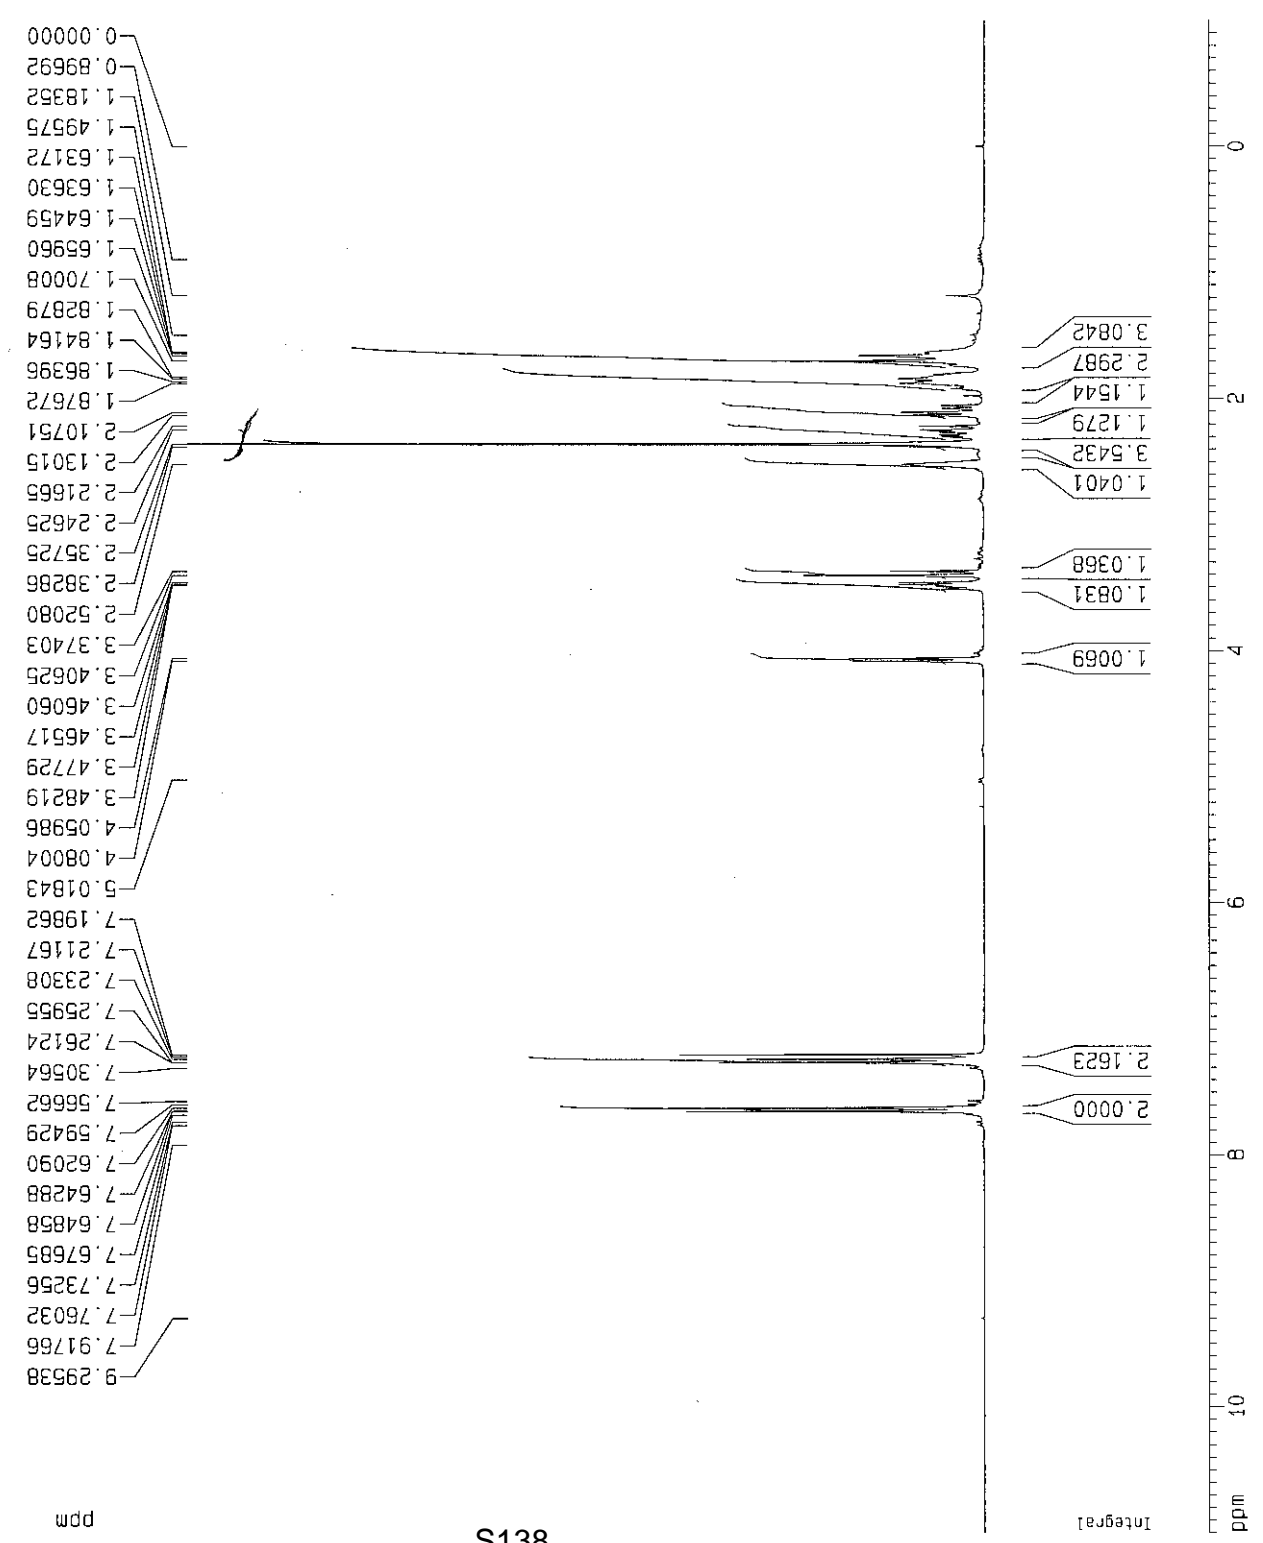

S138

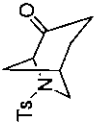

40

PL - II - p95 - P

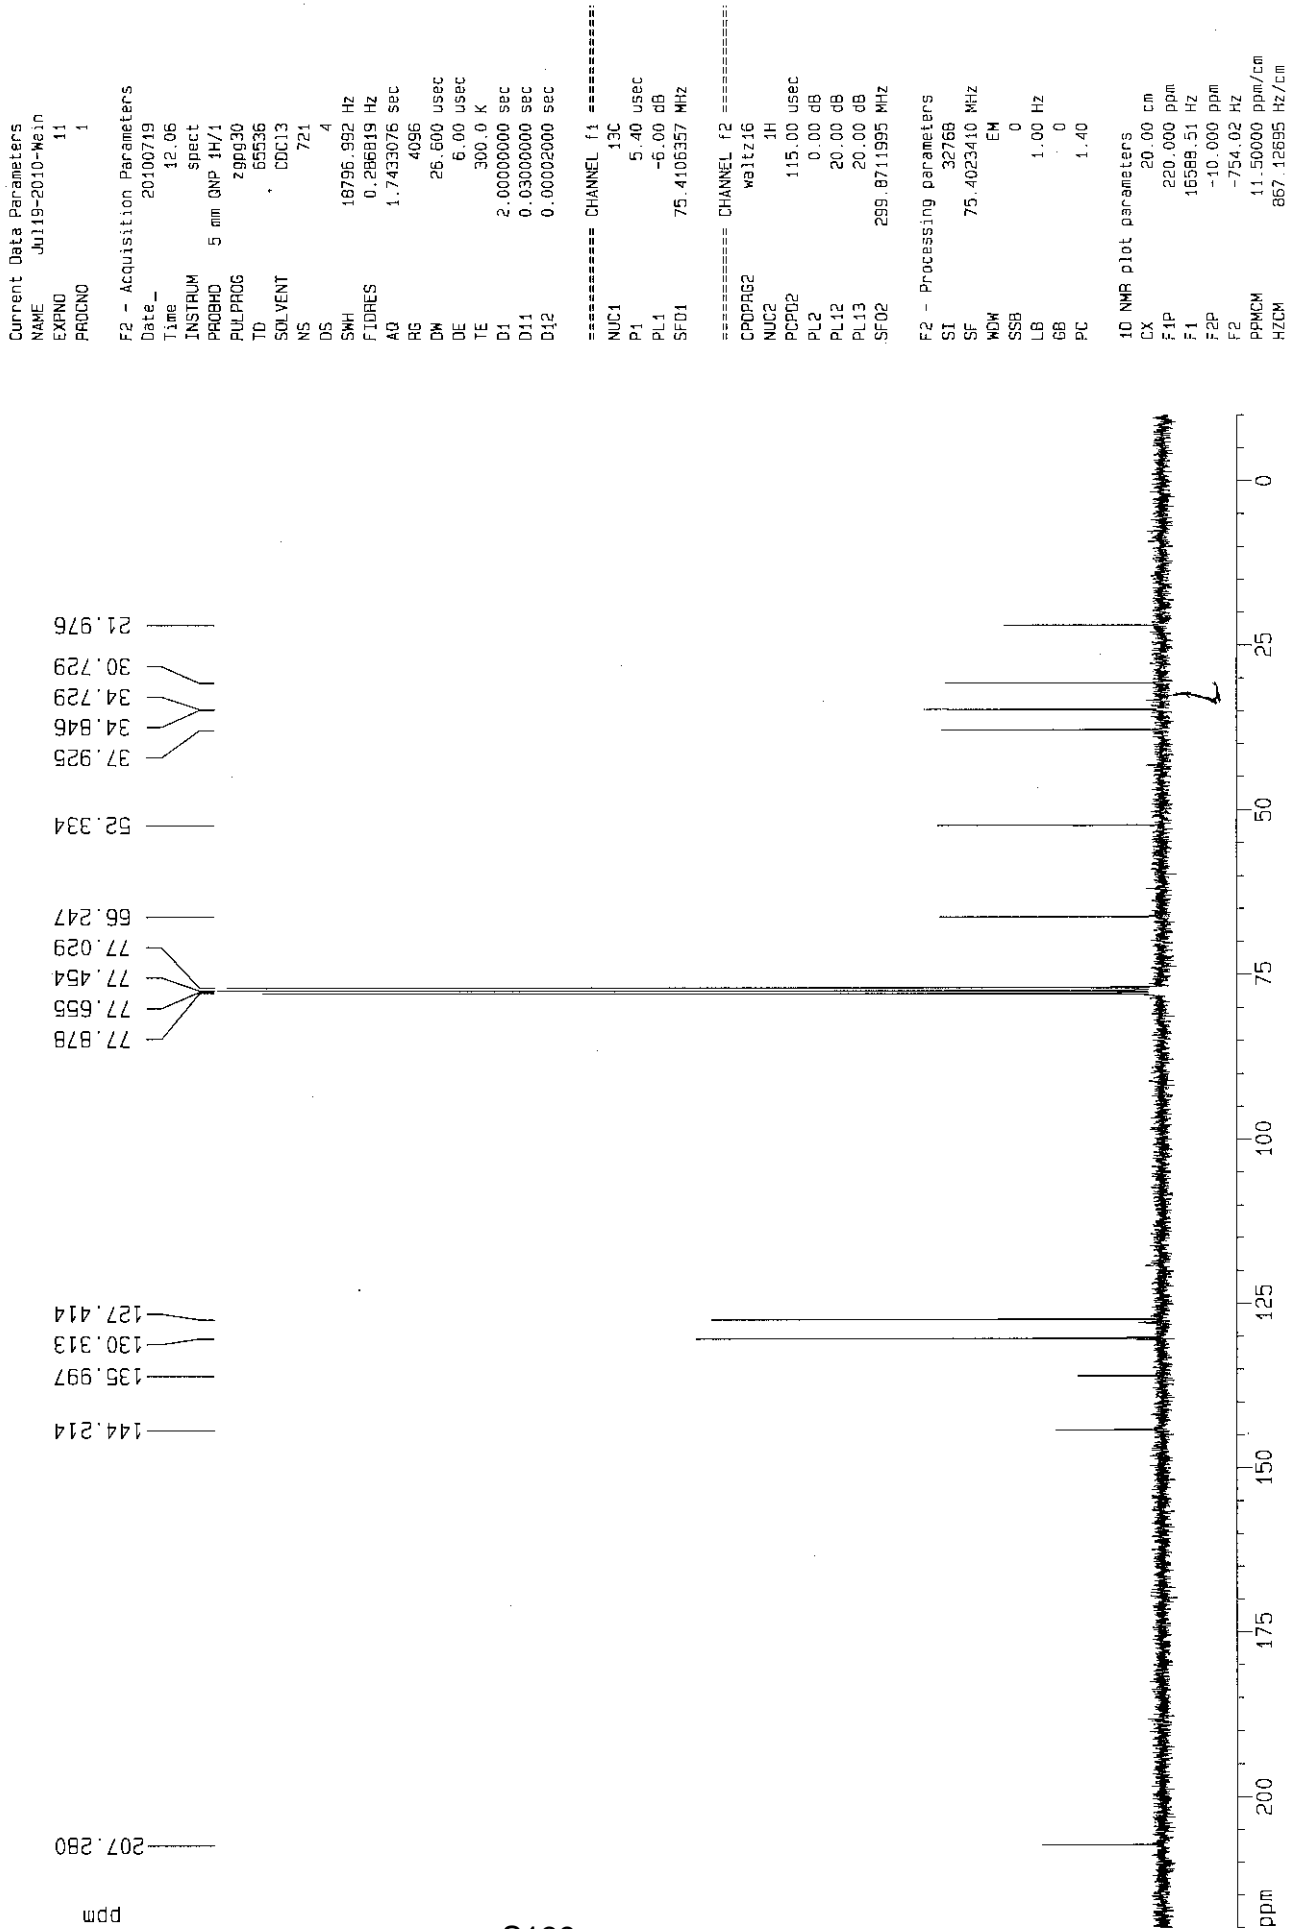

613S
